# Supplementary material
Source: publisher figshare collection journal article supplement (https://gsapubs.figshare.com/articles/dataset/_/23638812)
Supplement: Supplementary file 1 [file 1]

## Sheet: U-Pb LA-ICP-MS data
Sequence 1 (09.2021)
grain	sample	207Pba	Ub	Pbb	Thb	206Pbcc	206Pbd	±2s	207Pbd	±2s	207Pbd	±2s	rhoe	206Pb	±2s	207Pb	±2s	207Pb	±2s	concf	Preferred age	±2s
		(cps)	(ppm)	(ppm)	U	(%)	238U	(%)	235U	(%)	206Pb	(%)		238U	(Ma)	235U	(Ma)	206Pb	(Ma)	(%)	(Ma)	(Ma)
Sample Lev 6-7 (Leviathan 1 borehole, Middle-Late Miocene)
U006		42326.6	51.3605	23.4036	1.28097	0.0171085	0.352978	1.11972	6.11388	1.69296	0.125679	1.26978	0.661395	1948.8	18.8603	1992.23	14.8356	2037.59	23.2458	95.6427	2037.59	23.2458
U007		21854.8	203.955	19.7004	0.350336	0.0144349	0.0955162	1.12122	0.794402	1.87076	0.0603472	1.49753	0.599341	588.079	6.3097	593.666	8.41914	615.077	32.6672	95.6106	588.079	6.3097
U008		15098.9	132.474	14.656	0.7137	0.0514088	0.100053	1.1298	0.858342	2.22815	0.0622481	1.92047	0.507058	614.718	6.63239	629.218	10.4586	681.681	41.2831	90.1767	614.718	6.63239
U009		15657.1	144.691	19.671	1.93424	0.00811293	0.0939856	1.10911	0.778544	1.95448	0.0601057	1.6093	0.567471	579.066	6.15026	584.653	8.69627	606.409	35.1077	95.4909	579.066	6.15026
U010		22307.9	146.06	20.5957	0.717861	0.00522959	0.127642	1.04519	1.15857	1.78302	0.0658598	1.44455	0.58619	774.402	7.63793	781.281	9.7317	800.98	30.6347	96.6818	774.402	7.63793
U011		10669.7	101.389	11.0549	0.830905	0.00701977	0.09569	1.15774	0.777988	2.1849	0.058993	1.85295	0.529883	589.101	6.52553	584.335	9.71558	565.859	40.6065	104.107	589.101	6.52553
U012		13340.2	77.7626	10.7155	0.399221	0.0708529	0.132969	1.12685	1.26094	2.05511	0.0688082	1.71863	0.548314	804.779	8.53624	828.331	11.6514	892.065	35.8176	90.2152	804.779	8.53624
U013		15199.4	110.45	13.91	0.664007	0.0122407	0.114607	1.10618	1.0099	2.02898	0.0639382	1.70093	0.545187	699.447	7.34168	708.822	10.3629	738.636	36.3	94.6943	699.447	7.34168
U014		56017	122.966	26.7749	0.762617	5.2591	0.167958	1.11194	1.92992	2.74145	0.0833743	2.50582	0.405604	1000.85	10.3219	1091.51	18.3505	1277.12	49.1309	78.3681
U015		14317	117.841	13.1461	0.526485	0.00480852	0.105577	1.12839	0.897794	1.9318	0.0617026	1.56799	0.584113	647.007	6.95497	650.548	9.28995	662.852	33.9144	97.6096	647.007	6.95497
U016		44811.5	284.018	38.0609	0.498927	b.d.	0.12861	1.05	1.16786	1.58357	0.0658883	1.18541	0.663057	779.932	7.72456	785.641	8.67864	801.886	25.2825	97.2622	779.932	7.72456
U017		9441.56	39.4295	8.55924	1.15511	0.0198586	0.177387	1.2025	1.80884	2.22543	0.07399	1.87257	0.540347	1052.68	11.6926	1048.66	14.5692	1040.29	38.1227	101.192	1040.29	38.1227
U018		27796.4	265.764	30.5203	1.06379	0.00453754	0.0956891	1.03312	0.787077	1.73236	0.0596827	1.39059	0.596367	589.096	5.82482	589.512	7.75753	591.117	30.499	99.6581	589.096	5.82482
U019		8430.86	48.9736	7.72903	0.823666	0.058286	0.138213	1.27686	1.27247	2.30018	0.0668024	1.91323	0.555114	834.548	10.0051	833.493	13.0903	830.683	40.178	100.465	834.548	10.0051
U020		14641.8	102.158	12.0791	0.307098	0.0200955	0.117798	1.13536	1.04355	1.9737	0.0642793	1.61445	0.575246	717.876	7.72261	725.683	10.2457	749.883	34.4258	95.7317	717.876	7.72261
U021		9028.92	83.5559	9.84731	1.10927	0.0161881	0.0975348	1.21224	0.803459	2.39048	0.0597721	2.06031	0.507112	599.946	6.95205	598.778	10.8213	594.359	44.8848	100.94	599.946	6.95205
U022		2165.52	12.1553	1.58917	0.209231	1.30501	0.131169	1.73399	1.22467	4.59802	0.0677454	4.25852	0.377118	794.532	12.9689	811.907	25.7071	859.842	88.5147	92.4044	794.532	12.9689
U023		19446	94.17	16.1477	0.502006	0.276262	0.161857	1.12422	1.64282	2.20063	0.0736463	1.8918	0.510865	967.09	10.1093	986.795	13.9061	1030.88	38.5603	93.8119	1030.88	38.5603
U024		18899.7	145.617	19.1353	0.971474	0.00458475	0.112008	1.08233	0.979459	1.8611	0.0634497	1.51403	0.58155	684.401	7.03732	693.327	9.3625	722.385	32.4644	94.7419	684.401	7.03732
U025		34477	163.235	29.4712	0.907556	0.000136854	0.155672	1.09006	1.55163	1.7085	0.0723222	1.31558	0.63802	932.683	9.47869	951.144	10.5689	994.108	27.1919	93.8211	932.683	9.47869
U026		14008.3	134.127	15.931	1.23564	0.0190562	0.0954767	1.09836	0.782163	1.96826	0.0594421	1.63329	0.558038	587.846	6.17905	586.717	8.78032	582.349	35.7614	100.944	587.846	6.17905
U027		184650	145.249	72.0989	0.581131	0.00233676	0.434628	1.02477	9.62749	1.45935	0.160727	1.03901	0.70221	2326.55	20.0521	2399.8	13.5225	2462.56	18.7163	94.4766	2462.56	18.7163
U028		38958.5	286.434	33.292	0.195676	0.0182626	0.119739	1.06069	1.05201	1.64801	0.0637499	1.26129	0.64362	729.061	7.32221	729.879	8.59321	732.392	27.128	99.5452	729.061	7.32221
U029		1811.01	179.985	1.1517	0.645667	6.35392	0.00515071	1.96463	0.0321923	11.7708	0.0453501	11.6057	0.166907	33.1184	0.649228
U030		32185.1	237.449	27.4658	0.453475	0.00342785	0.110826	1.06738	0.966663	1.75842	0.063289	1.3974	0.60701	677.542	6.87441	686.742	8.78842	717.001	30.0431	94.4967	677.542	6.87441
U031		104520	1126.74	37.4318	0.666075	b.d.	0.0247376	3.60789	0.242537	3.79171	0.0711403	1.16626	0.951522	157.528	5.6152	220.496	7.51659	960.529	24.3269	16.4001
U032		47213.6	207.312	38.3464	0.659536	0.0030416	0.167441	1.05695	1.6965	1.61275	0.073517	1.21812	0.65537	997.995	9.78692	1007.22	10.3254	1027.33	25.1299	97.1446	1027.33	25.1299
U033		181910	297.543	115.507	1.29688	0.00502307	0.298802	1.03762	4.46767	1.47086	0.10849	1.04249	0.705451	1685.37	15.4149	1724.99	12.2596	1773.4	19.8658	95.0359	1773.4	19.8658
U034		15898.6	143.691	18.4426	1.46325	0.0269801	0.0977252	1.09723	0.809242	1.85917	0.060085	1.50086	0.590173	601.064	6.30515	602.029	8.45358	605.663	32.7881	99.2407	601.064	6.30515
Sample Lev 12 (Leviathan 1 borehole, Early Miocene)
U035		15171.4	72.3332	14.728	1.40812	0.0361604	0.157017	1.20826	1.58334	2.37313	0.0731682	2.04251	0.509144	940.178	10.5823	963.684	14.7833	1017.71	41.6637	92.3821	1017.71	41.6637
U036		36951.8	170.552	31.4459	0.879596	0.00339533	0.158035	1.0771	1.56769	1.71655	0.0719782	1.33656	0.627481	945.849	9.48912	957.514	10.6614	984.409	27.6495	96.0829	945.849	9.48912
U037		22885.2	145.66	19.9382	0.453466	0.00286263	0.132145	1.10032	1.20192	1.79454	0.0659961	1.41762	0.613149	800.09	8.29018	801.47	9.96108	805.31	30.0579	99.3518	800.09	8.29018
U038		24800.4	107.784	14.9938	0.538818	3.03101	0.119602	1.14226	1.12907	2.72631	0.0684977	2.47548	0.418976	728.274	7.87572	767.311	14.6896	882.721	51.4204	82.5033
U039		102037	339.175	80.3434	0.812517	0.00198295	0.208538	1.07222	2.35671	1.64334	0.0820003	1.24536	0.652461	1221.02	11.9447	1229.59	11.745	1244.64	24.9339	98.1023	1244.64	24.9339
U045		350544	242.423	136.728	0.687402	b.d.	0.481676	1.07338	11.285	1.47523	0.169996	1.01201	0.727601	2534.56	22.5352	2546.96	13.8685	2556.85	18.1807	99.1283	2556.85	18.1807
U046		140412	228.248	47.5909	0.3592	15.3704	0.151274	1.34566	1.35297	4.1109	0.0648958	3.88442	0.327339	908.104	11.4086	868.842	24.0088	770.015	81.9195	117.933
U047		12575.8	116.821	14.0639	1.28118	0.00257507	0.0956122	1.12862	0.800093	2.05259	0.0607185	1.71445	0.549851	588.644	6.35705	596.881	9.27245	628.307	37.2314	93.6873	588.644	6.35705
U048		3508.37	30.2025	3.68727	0.885311	0.0521113	0.106586	1.39897	0.891166	3.21906	0.0606672	2.89918	0.434588	652.888	8.6934	646.995	15.4087	626.486	62.6625	104.214	652.888	8.6934
U049		26636.1	183.383	24.8549	0.799768	0.125162	0.118653	1.12566	1.09202	1.87099	0.0667801	1.49449	0.60164	722.806	7.70651	749.486	9.9298	829.984	31.5296	87.0866
U050		7724.67	39.4671	6.57952	0.57791	0.0447824	0.15531	1.20012	1.48991	2.34484	0.0696074	2.01445	0.511811	930.661	10.4121	926.28	14.2608	915.867	41.7276	101.615	930.661	10.4121
U051		110545	345.389	51.0691	0.440407	0.956443	0.128589	1.53166	1.54575	1.98913	0.0872226	1.26911	0.770016	779.81	11.2576	948.799	12.2805	1364.55	25.0062	57.1477
U052		22106.7	137.995	20.6443	0.877985	0.025608	0.129262	1.10815	1.19407	1.95754	0.0670272	1.61368	0.566094	783.656	8.18776	797.845	10.8309	837.682	33.9487	93.5505	783.656	8.18776
U053		40850.7	325.75	30.2306	0.147748	0.974108	0.0943325	1.07684	0.796605	1.83204	0.0612739	1.48216	0.587781	581.109	5.99194	594.912	8.25806	647.897	32.1699	89.6916	581.109	5.99194
U054		8752.06	39.7792	7.67483	1.03146	0.0617235	0.1594	1.29016	1.6052	2.42779	0.0730692	2.05661	0.531413	953.441	11.4458	972.238	15.2033	1014.96	41.9642	93.9386	1014.96	41.9642
U055		82144.7	342.15	65.6631	0.672663	0.00983079	0.172351	1.02299	1.76219	1.56132	0.0741876	1.1795	0.655207	1025.05	9.71045	1031.65	10.1382	1045.67	24.3035	98.0285	1045.67	24.3035
U056		93257.1	378.523	64.7691	0.541408	0.119299	0.155761	1.13026	1.71182	1.69526	0.0797433	1.26349	0.666719	933.174	9.83213	1012.97	10.8876	1189.76	25.4634	78.434
U057		13842.5	117.35	14.1625	0.911567	0.0135179	0.103872	1.10976	0.886457	1.99604	0.0619231	1.6591	0.555979	637.062	6.74037	644.464	9.53389	670.49	35.8056	95.0143	637.062	6.74037
U058		7209.23	31.5702	5.96262	0.642538	0.0247722	0.172521	1.22937	1.72631	2.45371	0.0726057	2.12352	0.501024	1025.99	11.6735	1018.38	15.7912	1002.06	43.3935	102.388	1002.06	43.3935
U059		9690.15	88.3019	8.85675	0.306516	0.0514529	0.100545	1.14538	0.824356	2.35985	0.0594908	2.06325	0.48536	617.6	6.75366	610.476	10.8353	584.127	45.024	105.731	617.6	6.75366
U060		23367.3	193.174	19.8179	0.272025	0.0238745	0.103081	1.11648	0.870309	1.83044	0.0612614	1.45051	0.609952	632.442	6.73427	635.735	8.65939	647.46	31.4995	97.6805	632.442	6.73427
U061		1272.59	13.51	1.11247	0.0314578	0.139446	0.0896053	1.86895	0.670637	5.27192	0.054306	4.92951	0.354511	553.202	9.91229	521.099	21.4913	382.75	110.874	144.534
U062		2654.55	21.3625	2.34325	0.31827	0.246423	0.108908	1.50196	0.905638	4.02178	0.060338	3.73079	0.373457	666.4	9.51579	654.736	19.4123	614.745	80.7071	108.403	666.4	9.51579
U063		27634.3	212.732	23.3178	0.296036	0.0324237	0.10929	1.07364	0.941107	1.7405	0.0624815	1.36991	0.616856	668.625	6.82825	673.461	8.58051	689.672	29.5917	96.9481	668.625	6.82825
U064		20087.2	186.294	23.1348	1.28775	0.00226536	0.0980381	1.07049	0.805843	1.92786	0.0596417	1.60333	0.555275	602.901	6.16982	600.119	8.74477	589.623	35.0749	102.252	602.901	6.16982
U065		15190.6	141.02	12.9545	0.306676	0.0400845	0.0912891	1.13092	0.753131	2.03332	0.0598612	1.6898	0.556195	563.156	6.10605	570.039	8.87783	597.589	36.8871	94.2382	563.156	6.10605
U066		279558	1308.16	88.2759	0.956203	10.0028	0.0409878	1.40169	0.660292	3.07383	0.11689	2.73563	0.456009	258.953	3.56048	514.793	12.4175	1908.39	49.469	13.5692
U067		29000.6	253.13	26.7542	0.381646	0.0043975	0.10367	1.04221	0.86296	1.69511	0.0603995	1.33686	0.614834	635.878	6.31997	631.738	7.98442	616.947	29.2274	103.068	635.878	6.31997
U068		276765	235.363	98.0606	0.251234	0.00209087	0.387795	1.05688	9.21474	1.46998	0.172415	1.02169	0.718978	2112.59	19.0716	2359.58	13.56	2580.48	18.3052	81.8684
U069		163196	107.802	57.5117	0.506447	0.00668864	0.467685	1.07884	11.4144	1.52349	0.177089	1.07571	0.708134	2473.4	22.2008	2557.6	14.3292	2625.05	19.0953	94.223	2625.05	19.0953
U070		9367.81	50.6426	7.80499	0.764039	0.233086	0.134259	1.22246	1.35404	2.67538	0.0731785	2.37976	0.456929	812.115	9.33801	869.304	15.6367	1017.99	48.4507	79.7765
U071		62724.4	269.511	57.489	0.617713	0.538775	0.199047	1.41311	2.06845	1.93138	0.0754019	1.31657	0.731657	1170.2	15.1351	1138.42	13.2424	1078.33	26.8934	108.52	1078.33	26.8934
U072		56224.6	376.069	31.8001	1.2059	1.05265	0.0604765	1.5016	0.828305	4.05126	0.0993797	3.7627	0.370649	378.523	5.52394	612.671	18.6411	1611.66	70.3211	23.4865
U073		7047.13	43.9211	6.45967	0.609954	0.0481739	0.136359	1.27546	1.2493	2.41955	0.0664776	2.05606	0.527149	824.041	9.87612	823.087	13.6567	820.511	43.2044	100.43	824.041	9.87612
U074		56511.3	339.353	54.1515	0.982339	0.0156282	0.134192	1.06515	1.24757	1.59075	0.0674576	1.1815	0.669589	811.736	8.13558	822.306	8.98311	850.999	25.0211	95.3862	811.736	8.13558
U075		107596	460.633	85.7119	0.502909	0.00102312	0.175496	1.06528	1.81476	1.49689	0.0750318	1.0516	0.711659	1042.32	10.2676	1050.8	9.82538	1068.45	21.7194	97.5548	1068.45	21.7194
U076		211695	542.025	73.4743	0.7099	13.9058	0.087505	1.38061	0.799129	4.1602	0.066264	3.92444	0.331861	540.765	7.16713	596.337	18.7672	813.787	82.1859	66.4504
U077		60515.3	42.5808	26.2927	1.02253	0.0277574	0.494585	1.11158	11.0229	1.62095	0.161714	1.17978	0.685755	2590.48	23.753	2525.06	15.1873	2472.9	20.9475	104.755	2472.9	20.9475
U078		24258.1	261.034	25.2602	0.67401	0.0019906	0.0881946	1.06478	0.706879	1.77961	0.0581563	1.42592	0.598324	544.851	5.57071	542.891	7.49248	534.672	31.5435	101.904	544.851	5.57071
U079		35257.5	266.539	30.9095	0.405403	0.00823332	0.112773	1.06655	0.997651	1.72804	0.0641903	1.35963	0.617201	688.83	6.97754	702.617	8.77581	746.955	29.1166	92.2184	688.83	6.97754
U085		7458.72	77.3015	9.5246	1.54894	0.138465	0.0923824	1.17458	0.735167	2.45246	0.0577419	2.15288	0.478941	569.611	6.41072	559.582	10.5574	518.997	47.4714	109.752	569.611	6.41072
U086		170377	119.596	64.8928	0.830174	0.0019378	0.446797	1.04142	11.1526	1.46219	0.181116	1.02637	0.712235	2381	20.7714	2535.96	13.7338	2662.37	18.2893	89.4314
U087		64811.2	91.9284	37.347	0.882263	0.00421143	0.343197	1.05695	5.41718	1.61133	0.114531	1.21624	0.65595	1902.03	17.4388	1887.58	13.8711	1871.71	22.6924	101.62	1871.71	22.6924
U088		32027.5	284.658	26.8499	0.0321099	0.0613666	0.101671	1.06203	0.843079	1.6962	0.0601682	1.32257	0.626123	624.192	6.3271	620.843	7.88959	608.655	28.9609	102.553	624.192	6.3271
U089		6217.61	48.9848	6.5433	0.717684	0.0639954	0.122524	1.2227	1.02961	2.50001	0.0609743	2.18061	0.489077	745.073	8.61246	718.732	12.8868	637.358	47.1457	116.9
U090		32485.2	175.464	24.8513	0.145661	0.0174592	0.146897	1.08014	1.37822	1.76435	0.0680772	1.39508	0.612199	883.545	8.93087	879.681	10.3993	869.973	29.307	101.56	883.545	8.93087
U091		30438.3	203.488	26.8437	0.399249	0.00645485	0.128571	1.04434	1.16031	1.73601	0.0654824	1.38675	0.601577	779.707	7.68098	782.099	9.48252	788.929	29.4928	98.8311	779.707	7.68098
U092		34796.2	159.283	28.0391	0.577437	0.0282816	0.162407	1.1042	1.64861	1.70125	0.0736559	1.29421	0.649054	970.14	9.95876	989.019	10.7732	1031.14	26.6261	94.0838	1031.14	26.6261
U093		22003.4	184.794	19.2888	0.240595	0.0234558	0.106118	1.07699	0.905782	1.81848	0.0619337	1.46525	0.592249	650.165	6.66978	654.813	8.78713	670.859	31.6952	96.9153	650.165	6.66978
U094		46314.7	389.094	40.2451	0.256288	0.0536248	0.1042	1.03992	0.929287	1.64937	0.0647106	1.28024	0.630494	638.976	6.33537	667.26	8.07957	763.995	27.3914	83.6362
U095		80107.4	62.6772	32.1633	0.464791	0.0337795	0.459999	1.13308	10.5508	1.59051	0.166426	1.11617	0.712404	2439.55	23.0506	2484.39	14.848	2521.27	19.863	96.759	2521.27	19.863
U096		30224	231.779	27.3762	0.412068	0.024088	0.114585	1.05873	1.00649	1.70753	0.0637344	1.33968	0.620035	699.322	7.02642	707.098	8.71029	731.875	28.7671	95.5521	699.322	7.02642
U097		3221.5	26.8844	3.2784	0.777775	0.611704	0.108194	1.3873	0.922022	4.03654	0.0618346	3.79065	0.343686	662.251	8.73846	663.428	19.6669	667.431	81.2882	99.2239	662.251	8.73846
U098		83886.8	70.8988	26.569	0.119446	0.0960529	0.35776	1.13997	8.32961	1.61084	0.168938	1.1381	0.707688	1971.55	19.3921	2267.55	14.6843	2546.39	20.1761	77.4252
U099		131234	89.4374	45.8151	0.476	0.0441977	0.449636	1.0971	10.9635	1.53188	0.176922	1.06913	0.716178	2393.63	21.9737	2520.04	14.3569	2623.48	18.9947	91.2389	2623.48	18.9947
U100		101734	150.654	58.8102	0.888404	0.00142239	0.32828	1.03123	5.21707	1.50248	0.115312	1.09271	0.686353	1830.04	16.4588	1855.41	12.8641	1883.96	20.5228	97.1381	1883.96	20.5228
U101		25588.1	149.122	19.9535	0.456043	0.0143087	0.126292	1.12545	1.20714	1.78032	0.0693548	1.37945	0.632166	766.677	8.14558	803.877	9.90188	908.385	28.8242	84.3999
U102		26940.5	200.87	28.3592	0.990075	0.0136133	0.11918	1.091	1.04949	1.91326	0.0638959	1.57172	0.570229	725.839	7.49941	728.632	9.96038	737.233	33.5981	98.4546	725.839	7.49941
U103		334736	226.037	132.766	0.76262	0.00157992	0.490603	1.03788	11.3944	1.43415	0.168521	0.989735	0.723693	2573.29	22.0638	2555.96	13.4995	2542.25	17.8494	101.221	2542.25	17.8494
U104		95195.7	846.596	75.4964	0.102493	0.0143964	0.0938699	1.07778	0.81037	1.59384	0.0626399	1.17419	0.676218	578.384	5.97028	602.662	7.2558	695.069	25.4565	83.2125
U105		9716.11	112.412	11.6401	1.22087	0.0523095	0.082179	1.15311	0.641798	2.33983	0.0566671	2.03596	0.492819	509.116	5.65141	503.419	9.29368	477.609	45.231	106.597	509.116	5.65141
U106		12208.2	85.308	12.8438	1.13088	0.0274561	0.123325	1.1463	1.08888	2.13675	0.0640653	1.80325	0.536468	749.673	8.12252	747.96	11.3211	742.835	38.4225	100.921	749.673	8.12252
U107		10229.8	66.4793	9.67501	0.651696	0.057956	0.133453	1.14184	1.19814	2.24136	0.0651437	1.9287	0.509441	807.537	8.67738	799.728	12.4168	778.034	40.8306	103.792	807.537	8.67738
U108		7077.23	79.5052	6.81502	0.350627	0.0408911	0.0852199	1.1793	0.679517	2.57963	0.0578567	2.29428	0.45716	527.205	5.97656	526.482	10.6035	523.351	50.5249	100.736	527.205	5.97656
U109		9000.23	68.3552	7.13553	0.427541	0.650739	0.0980138	1.24465	0.887535	2.59887	0.0657041	2.28144	0.478921	602.758	7.16943	645.044	12.4158	796.02	48.0689	75.7215
U110		316943	234.965	128.786	0.634177	0.000615135	0.473467	1.061	10.6885	1.44896	0.163803	0.986786	0.732254	2498.75	22.0185	2496.43	13.5604	2494.54	17.8554	100.169	2494.54	17.8554
U111		328927	218.035	125.447	0.751794	0.00141948	0.479904	1.04088	11.6737	1.43977	0.176501	0.994742	0.722948	2526.85	21.801	2578.59	13.5794	2619.51	17.8461	96.4626	2619.51	17.8461
U112		11531.3	56.6956	10.0349	0.515001	0.124053	0.167147	1.13781	1.6112	2.14314	0.069943	1.81616	0.530909	996.374	10.5177	974.575	13.4437	925.758	37.623	107.628	996.374	10.5177
U113		73825.5	314.001	56.6787	0.232855	0.0335278	0.182425	1.06327	1.8782	1.5662	0.0747056	1.14997	0.678886	1080.21	10.5906	1073.43	10.4033	1059.69	23.6759	101.937	1059.69	23.6759
U114		220897	514.902	87.1558	1.02973	6.23868	0.110705	1.44607	1.5179	3.4823	0.0994885	3.16785	0.415263	676.839	9.29832	937.632	21.3253	1613.7	59.264	41.9433
U115		42113.5	195.867	39.0798	0.936123	0.0190031	0.170584	1.06819	1.68798	1.71034	0.0717997	1.33575	0.624548	1015.33	10.0494	1004	10.9271	979.351	27.6532	103.674	1015.33	10.0494
U116		29361.8	139.332	20.1704	0.254145	2.23095	0.139363	1.08496	1.30925	2.46285	0.0681662	2.21099	0.440532	841.062	8.56683	849.799	14.1899	872.681	46.0486	96.3768	841.062	8.56683
U117		8572.97	73.9982	8.98312	0.792863	0.039918	0.107862	1.1514	0.916744	2.32366	0.0616698	2.01833	0.495512	660.32	7.23512	660.636	11.2935	661.715	43.5003	99.7892	660.32	7.23512
U118		12734.9	125.836	13.158	0.632136	0.0370266	0.0966838	1.13829	0.800693	1.96612	0.0600906	1.6031	0.578953	594.945	6.47692	597.22	8.88629	605.866	34.9778	98.1974	594.945	6.47692
U119		17783.4	117.149	16.3295	0.588889	0.333307	0.128011	1.09504	1.1625	2.07192	0.0658931	1.7589	0.528516	776.511	8.02173	783.132	11.322	802.04	37.1482	96.817	776.511	8.02173
U120		8492.6	44.6715	8.887	1.1514	0.030646	0.163573	1.2868	1.47051	2.45856	0.0652303	2.09491	0.523395	976.604	11.673	918.337	14.8722	780.828	44.2842	125.073
U121		8804.29	57.5887	9.41853	1.06422	0.267119	0.136197	1.16801	1.21987	2.39376	0.0649888	2.08945	0.487941	823.123	9.03643	809.716	13.3679	773.029	44.2243	106.48	823.123	9.03643
U122		50200.4	258.582	38.5236	0.354685	0.00411409	0.145096	1.04902	1.39266	1.61762	0.0696442	1.23137	0.648496	873.413	8.58145	885.826	9.57927	916.955	25.791	95.2515	873.413	8.58145
U123		147092	124.736	52.6298	0.580064	0.0103898	0.362082	1.413	8.34028	1.81929	0.167135	1.14597	0.776677	1992.04	24.2373	2268.71	16.567	2528.4	20.326	78.7864
U124		60916.2	40.3496	21.9611	0.871531	0.0319415	0.432983	1.27355	10.6075	1.73908	0.177762	1.18426	0.732314	2319.15	24.8375	2489.37	16.2256	2631.35	20.787	88.1354
U125		48717.7	242.949	41.2042	0.425763	0.0118165	0.164148	1.0453	1.58906	1.58591	0.0702423	1.19267	0.659119	979.786	9.51584	965.928	9.9052	934.522	24.9471	104.843	979.786	9.51584
U126		144484	94.8153	70.4804	2.05247	0.000961004	0.497137	1.04471	12.1774	1.47379	0.177735	1.03954	0.708858	2601.48	22.4062	2618.17	13.9431	2631.1	18.5265	98.8743	2631.1	18.5265
U127		12002.3	70.3868	9.67762	0.256567	0.230561	0.137535	1.16416	1.30706	2.14264	0.0689567	1.79879	0.543328	830.711	9.08448	848.835	12.3394	896.516	37.4333	92.6598	830.711	9.08448
U128		78592.2	101.389	40.7354	0.695842	0.0103624	0.349746	1.0985	6.02776	1.60194	0.125054	1.16597	0.685735	1933.39	18.3785	1979.86	14.0161	2028.76	21.4943	95.2986	2028.76	21.4943
U129		60708.6	274.33	52.5313	0.683811	0.0129361	0.173078	1.05201	1.7326	1.5642	0.0726356	1.15758	0.672556	1029.05	10.021	1020.72	10.0943	1002.89	24.0114	102.608	1002.89	24.0114
U135		12639.9	82.9769	12.19	0.551442	0.0777854	0.138627	1.25826	1.24191	2.17384	0.0650037	1.77266	0.578821	836.892	9.88555	819.749	12.24	773.511	37.6001	108.194	836.892	9.88555
U136		46511.9	50.8801	25.2277	1.95551	0.251374	0.327	1.3026	6.98954	1.92257	0.155094	1.41404	0.67753	1823.82	20.7151	2110.1	17.1382	2402.1	24.8812	75.9263
U137		22808.1	154.154	21.2675	0.662229	0.00807406	0.125195	1.13763	1.11967	1.90086	0.0648931	1.52285	0.598482	760.393	8.1699	762.817	10.2085	769.925	32.41	98.762	760.393	8.1699
U138		2000.33	18.9407	2.39409	1.37247	0.321735	0.0977538	1.80214	0.790137	5.02734	0.0586493	4.69323	0.358468	601.232	10.3501	591.249	22.5348	553.121	102.52	108.698	601.232	10.3501
U139		63760.1	266.835	37.4684	0.931923	0.634618	0.114829	1.05532	1.9031	2.41296	0.120255	2.16994	0.437357	700.733	7.01728	1082.17	16.0781	1959.2	39.1788	35.7662
U140		34261	223.183	34.041	0.808246	0.00305915	0.135258	1.04642	1.23333	1.68364	0.0661624	1.31896	0.621521	817.79	8.04884	815.854	9.45702	810.578	27.9982	100.89	817.79	8.04884
U141		40235.6	310.105	32.8926	0.0868687	0.76782	0.110666	1.07411	0.941981	1.80761	0.0617623	1.45387	0.594216	676.612	6.90866	673.919	8.9147	664.927	31.4838	101.757	676.612	6.90866
U142		26244.5	188.266	23.9147	0.454508	0.0484453	0.121819	1.1307	1.10476	1.90146	0.0658033	1.52875	0.594647	741.026	7.92504	755.652	10.1471	799.183	32.3872	92.723	741.026	7.92504
U143		13421.6	92.1612	13.3812	0.749268	0.0403655	0.12989	1.15064	1.16081	2.24375	0.0648458	1.92625	0.512819	787.235	8.53737	782.337	12.2507	768.39	40.841	102.453	787.235	8.53737
U144		389796	573.37	89.02	0.978388	38.0324	0.0629437	3.09563	0.533472	7.86725	0.0614969	7.23262	0.393483	393.503	11.8189	434.111	27.7916	655.696	155.215	60.013
U145		66572.5	291.82	64.8282	1.40595	0.0230124	0.168108	1.07366	1.76742	1.60796	0.0762859	1.197	0.667713	1001.68	9.97513	1033.57	10.4509	1101.68	24.4624	90.9227	1101.68	24.4624
U146		80113.2	48.3206	28.987	0.537252	0.0436655	0.520167	1.13116	13.0259	1.62657	0.181701	1.16885	0.695425	2699.89	24.993	2681.53	15.4464	2667.71	20.4958	101.206	2667.71	20.4958
U147		25965.2	199.292	21.9632	0.268896	0.0917814	0.110123	1.09991	0.976333	1.8426	0.0643302	1.4783	0.596933	673.461	7.04288	691.723	9.25467	751.556	31.5716	89.6088	673.461	7.04288
U148		95068.6	211.021	65.374	0.75131	0.00922195	0.273173	1.05321	3.58725	1.50046	0.0952836	1.06871	0.701922	1556.89	14.5912	1546.71	11.9605	1532.84	20.8438	101.569	1532.84	20.8438
U149		18741.4	113.18	15.8475	0.316357	0.024553	0.13894	1.09997	1.27424	1.85565	0.0665452	1.49449	0.59277	838.668	8.66186	834.285	10.5722	822.631	31.5646	101.949	838.668	8.66186
U150		11873.4	75.3053	10.6347	0.688162	1.05742	0.1259	1.28963	1.13911	3.20067	0.0656497	2.92936	0.402926	764.436	9.30533	772.087	17.3142	794.284	61.6183	96.2421	764.436	9.30533
U151		10633.1	111.501	9.37861	0.0103829	0.0251319	0.0914041	1.14777	0.757158	2.04632	0.0601056	1.69413	0.560892	563.836	6.20392	572.369	8.96169	606.407	36.9273	92.9798	563.836	6.20392
U152		57547	95.1521	41.2404	1.58623	0.0117417	0.318063	1.07649	4.81003	1.61446	0.109731	1.20318	0.666781	1780.26	16.7728	1786.65	13.6257	1794.13	22.6423	99.2273	1794.13	22.6423
U153		6607.48	54.8379	5.97659	0.0964984	0.0870697	0.11544	1.17561	0.986218	2.66517	0.0619884	2.39188	0.441101	704.264	7.85222	696.788	13.4453	672.745	51.3746	104.685	704.264	7.85222
U154		90786.9	79.6477	45.0328	1.42094	0.0590954	0.420794	1.17698	9.0599	1.63097	0.156224	1.12906	0.721646	2264.08	22.5038	2344.07	14.9993	2414.43	20.2206	93.7728	2414.43	20.2206
U155		12982.2	104.932	11.4701	1.11143	1.14062	0.085983	1.21054	0.850567	3.15817	0.0717778	2.91696	0.383304	531.736	6.18511	624.96	14.7452	978.731	59.6344	54.3291
U156		48171.1	132.712	20.1286	0.534174	8.69745	0.119759	1.21582	1.72186	3.6289	0.104323	3.41917	0.335037	729.178	8.39152	1016.72	23.3199	1701.59	63.2245	42.8528
U157		164565	107.402	65.2328	0.730416	0.00160009	0.51228	1.02729	12.4565	1.46322	0.176434	1.04196	0.702077	2666.36	22.4784	2639.45	13.8698	2618.88	18.5776	101.813	2618.88	18.5776
U158		18328	84.6688	15.6617	0.881133	0.379443	0.157999	1.09983	1.72889	2.12991	0.0793976	1.82397	0.516376	945.648	9.6869	1019.34	13.7192	1181.17	36.4149	80.06
U159		401383	127.094	106.965	0.670322	0.000906722	0.671111	1.04481	24.8235	1.43286	0.268387	0.980534	0.729181	3310.16	27.1066	3301.3	14.1646	3295.92	17.1279	100.432	3295.92	17.1279
U160		65231.7	63.1742	40.3818	2.37743	0.0060721	0.405134	1.12532	8.26012	1.59079	0.147939	1.12439	0.707402	2192.64	20.9488	2259.96	14.49	2321.46	20.2866	94.4505	2321.46	20.2866
U161		9177.31	72.8729	8.60239	0.42012	0.0387128	0.114435	1.23082	0.991812	2.43664	0.0628877	2.10292	0.505132	698.451	8.15592	699.644	12.3289	703.48	44.9998	99.2851	698.451	8.15592
U162		20350.1	201.7	17.9289	0.343826	0.350077	0.0864536	1.12133	0.748589	2.02968	0.0628281	1.69181	0.552464	534.529	5.75915	567.405	8.83137	701.461	36.3206	76.2022
U163		12537.9	74.301	8.80206	0.257988	0.394941	0.116035	1.24082	1.08859	2.34564	0.0680723	1.99058	0.52899	707.699	8.32506	747.818	12.4242	869.825	41.5292	81.3611
U164		20409.4	98.38	19.2816	0.941564	0.127219	0.16594	1.13098	1.63377	1.9143	0.0714387	1.54448	0.590809	989.702	10.39	983.312	12.0759	969.075	31.8943	102.128	989.702	10.39
U165		24716.7	107.834	20.1203	0.561707	0.0206287	0.173339	1.12757	1.80348	1.7451	0.0754934	1.3319	0.646135	1030.48	10.7524	1046.72	11.4211	1080.77	27.1865	95.3474	1080.77	27.1865
U166		54540	298.909	41.3143	0.669915	0.00540901	0.124037	1.08549	1.31665	1.78095	0.0770212	1.41191	0.609501	753.761	7.73229	853.044	10.294	1120.84	28.6068	67.2495
U167		54634.3	52.9078	7.31786	0.807131	0.45766	0.0650236	7.12388	1.55856	7.33266	0.173918	1.73731	0.971527	406.104	28.0388	953.895	45.359	2594.96	29.7255	15.6497
U168		47828.6	218.367	39.7272	0.543565	0.00797822	0.169481	1.11932	1.7396	1.69224	0.0744768	1.26918	0.66144	1009.25	10.4707	1023.31	10.9329	1053.51	26.0482	95.7991	1053.51	26.0482
U169		155357	94.084	58.8181	0.864278	0.00032311	0.506316	1.06314	12.9259	1.48614	0.18524	1.03844	0.715369	2640.88	23.0796	2674.27	14.124	2699.61	18.4359	97.8247	2699.61	18.4359
Sample Lev 17 (Leviathan 1 borehole, Early Miocene)
U170		128098	150.841	67.4532	0.712211	0.0432298	0.38734	1.07492	6.71656	1.52617	0.12582	1.0834	0.704321	2110.48	19.3794	2074.8	13.5619	2039.57	20.0754	103.477	2039.57	20.0754
U171		10872.8	74.8125	10.3582	0.630923	0.037185	0.12705	1.15533	1.1296	2.20351	0.0645123	1.87635	0.524312	771.016	8.4058	767.562	11.8793	757.52	39.8651	101.782	771.016	8.4058
U172		29656.1	274.055	25.4179	0.00355225	0.0104766	0.100935	1.06523	0.84267	1.72758	0.0605774	1.36008	0.6166	619.885	6.30437	620.618	8.03302	623.293	29.6928	99.4532	619.885	6.30437
U173		774744	460.433	141.72	0.427437	0.626503	0.238912	2.33288	7.78161	2.59956	0.236334	1.14689	0.897416	1381.04	29.0101	2206.08	23.4377	3094.73	19.6803	44.6255
U174		7910.43	32.6329	6.57068	0.447648	0.0765825	0.193506	1.26479	1.99729	2.4007	0.0748926	2.0405	0.526844	1140.34	13.2334	1114.59	16.2612	1064.72	41.3385	107.103	1064.72	41.3385
U175		15941.8	73.5371	12.7943	0.481754	0.07534	0.163543	1.19696	1.65065	2.03049	0.0732348	1.64018	0.589493	976.437	10.858	989.802	12.8567	1019.55	33.5777	95.7716	1019.55	33.5777
U176		73905.4	89.5022	39.0406	0.638557	0.0244948	0.385488	1.06467	6.75938	1.62656	0.12723	1.2297	0.654555	2101.87	19.129	2080.42	14.4567	2059.26	22.5162	102.069	2059.26	22.5162
U177		11677.1	48.5462	9.61785	0.593482	0.0560866	0.182651	1.18544	1.89511	2.15636	0.0752846	1.80128	0.549742	1081.44	11.8164	1079.38	14.3512	1075.21	36.5125	100.58	1075.21	36.5125
U178		25953.2	271.611	32.7875	1.44801	0.00800906	0.0924549	1.07901	0.754446	1.75395	0.0592096	1.38278	0.615189	570.039	5.89459	570.801	7.6682	573.834	30.416	99.3387	570.039	5.89459
U179		16094.4	185.107	18.6551	0.868943	0.0166144	0.0880185	1.10101	0.70729	1.99807	0.0583066	1.66736	0.551033	543.808	5.74913	543.136	8.41299	540.317	36.7474	100.646	543.808	5.74913
U180		48920.8	128.344	20.2684	1.10314	11.7436	0.0990929	1.33876	0.985759	4.27797	0.0721809	4.06309	0.312944	609.091	7.78772	696.554	21.5683	990.131	82.7857	61.5162
U181		42157.7	333.623	36.2854	0.367036	0.618448	0.104597	1.05841	0.927823	1.74708	0.0643638	1.38998	0.605817	641.29	6.46989	666.489	8.54971	752.659	29.7237	85.2032
U182		34437.1	199.764	29.8994	0.397832	0.00690958	0.14547	1.06441	1.35459	1.62781	0.0675663	1.23158	0.653893	875.518	8.72659	869.541	9.52719	854.345	26.0305	102.478	875.518	8.72659
U183		4183.91	42.7577	5.18764	1.33673	0.00926063	0.095736	1.31614	0.781714	3.06297	0.0592471	2.76578	0.429693	589.372	7.4196	586.461	13.6511	575.209	60.3053	102.462	589.372	7.4196
U184		13605.7	66.91	12.0244	0.71417	0.0793749	0.160563	1.09897	1.6027	2.14721	0.0724271	1.84466	0.511813	959.906	9.81467	971.265	13.4418	997.054	37.802	96.2742	959.906	9.81467
U185		23714.6	169.48	23.6723	0.728739	0.00586515	0.125403	1.07776	1.11612	1.79427	0.0645799	1.43451	0.600669	761.59	7.75251	761.117	9.62315	759.731	30.619	100.245	761.59	7.75251
U186		83196.3	397.48	49.1961	0.387815	4.0406	0.109109	1.10664	0.994484	2.44984	0.0661352	2.18565	0.45172	667.57	7.02705	701.006	12.4124	809.717	45.9724	82.4448
U187		11093.8	58.4821	9.62741	0.480361	0.0718634	0.156445	1.21653	1.51813	2.20513	0.0704112	1.8392	0.55168	936.988	10.6209	937.722	13.5139	939.447	38.0147	99.7383	936.988	10.6209
U188		130813	60.2423	43.0687	0.192918	0.0821975	0.652445	1.11889	19.2976	1.56944	0.214611	1.10056	0.712923	3237.75	28.5315	3056.81	15.2926	2939.97	19.1368	110.129	2939.97	19.1368
U189		44177.7	366.442	38.7435	0.0875022	0.00901049	0.112231	1.06345	0.960403	1.58799	0.062092	1.17931	0.669685	685.69	6.92729	683.505	7.91291	676.318	25.6374	101.386	685.69	6.92729
U195		18896.4	167.361	17.5347	0.280354	0.00793796	0.105556	1.07443	0.891486	1.83381	0.0612811	1.48609	0.585899	646.887	6.62203	647.168	8.78701	648.148	32.2521	99.8054	646.887	6.62203
U196		6837.6	31.9277	5.81078	0.542936	0.154984	0.170067	1.25169	1.7207	2.63647	0.0734141	2.3204	0.474759	1012.48	11.7405	1016.28	16.9449	1024.5	47.2094	98.827	1024.5	47.2094
U197		32105.1	212.759	33.7176	1.02886	0.0173209	0.132265	1.06722	1.19988	1.6715	0.0658246	1.28645	0.638483	800.773	8.04798	800.532	9.27311	799.861	27.3721	100.114	800.773	8.04798
U198		36064.3	273.35	29.4187	0.375779	b.d.	0.106199	1.09559	1.01066	1.67564	0.0690522	1.26786	0.653833	650.635	6.78931	709.206	8.56578	899.373	26.5961	72.3432
U199		20805.2	119.131	18.4351	0.43088	0.02851	0.149209	1.13939	1.39899	1.87299	0.0680322	1.48657	0.608326	896.527	9.54849	888.509	11.107	868.603	31.185	103.215	896.527	9.54849
U200		3020.05	25.0692	3.02384	0.629547	0.334369	0.110973	1.53135	0.928773	4.32414	0.0607279	4.0439	0.354141	678.393	9.86734	666.989	21.1475	628.642	87.258	107.914	678.393	9.86734
U201		8673.15	58.9753	10.1422	1.44627	0.0148381	0.131983	1.19946	1.18366	2.28752	0.0650731	1.94783	0.524349	799.17	9.02549	793.016	12.6019	775.755	41.2448	103.018	799.17	9.02549
U202		23740.1	209.965	28.4172	1.30069	0.0279405	0.107224	1.08928	0.933866	1.83596	0.0631955	1.47792	0.5933	656.606	6.80915	669.667	9.01379	713.862	31.7485	91.9794	656.606	6.80915
U203		1746.23	30.5386	2.62001	1.99079	0.126259	0.0586706	1.81163	0.437567	4.92376	0.054115	4.57837	0.367935	367.536	6.4751	368.535	15.2196	374.826	103.133	98.055	367.536	6.4751
U204		80819.1	489.852	38.8599	1.02697	6.3905	0.0521302	1.36703	0.541573	3.23522	0.075381	2.93221	0.422545	327.586	4.36982	439.461	11.5444	1077.78	59.066	30.3947
U205		65288.6	133.092	29.8488	0.778579	9.64176	0.160035	1.25097	1.47725	3.64618	0.0669782	3.42487	0.343091	956.969	11.137	921.103	22.0865	836.159	71.5091	114.448
U206		10941.6	70.7267	16.8701	3.61856	0.0254095	0.124389	1.21159	1.2091	2.30934	0.0705305	1.96599	0.524648	755.774	8.64995	804.779	12.8458	942.916	40.5723	80.1528
U207		57308.3	291.134	48.215	0.430921	0.0171303	0.158829	1.11547	1.56637	1.71817	0.071558	1.30684	0.64922	950.266	9.86879	956.99	10.6679	972.478	27.1003	97.716	950.266	9.86879
U208		3999.49	46.8676	5.24526	1.62167	0.194521	0.0823134	1.48264	0.655353	3.50097	0.0577696	3.17153	0.423493	509.916	7.27404	511.768	14.0778	520.047	69.7484	98.0521	509.916	7.27404
U209		127165	557.209	76.8146	0.277478	3.43147	0.127329	1.10478	1.20752	2.2428	0.0688112	1.95182	0.49259	772.613	8.05461	804.051	12.4689	892.157	40.5935	86.6005
U210		12831.7	40.4942	8.17321	0.460706	2.83704	0.18008	1.23657	1.91498	2.87515	0.0771599	2.59565	0.430089	1067.41	12.1778	1086.32	19.1929	1124.43	51.9841	94.9296	1124.43	51.9841
U211		21873.2	207.046	21.1881	0.455575	0.075211	0.0982743	1.10181	0.859498	1.89509	0.0634598	1.54188	0.581402	604.288	6.3638	629.849	8.90457	722.723	33.0475	83.6127
U212		37462.2	229.911	29.5899	0.553305	0.060098	0.11756	1.1147	1.1785	1.73793	0.0727384	1.33337	0.641391	716.504	7.56869	790.614	9.56142	1005.76	27.5021	71.24
U213		5247.47	58.3451	7.0156	1.47819	0.119459	0.0921819	1.31115	0.730893	2.88058	0.057531	2.56488	0.45517	568.428	7.1403	557.077	12.3566	510.958	56.5566	111.248
U214		23298.4	118.491	18.0325	0.351702	0.292936	0.146964	1.17705	1.45814	1.96042	0.071992	1.56774	0.600408	883.921	9.73391	913.242	11.8242	984.8	32.2894	89.7564	883.921	9.73391
U215		6469.39	66.5408	7.26006	0.812866	0.0626454	0.0964036	1.24149	0.775714	2.51721	0.0583851	2.18976	0.493201	593.298	7.0441	583.036	11.1725	543.261	48.0817	109.21	593.298	7.0441
U216		39798.3	166.296	29.0491	0.423171	0.168236	0.164562	1.10724	1.7995	1.77122	0.0793444	1.38248	0.62513	982.077	10.0999	1045.28	11.5823	1179.85	27.8055	83.2373
U217		40788.4	29.0722	17.8632	1.17673	0.132746	0.465459	1.24267	11.0483	1.75706	0.172229	1.24218	0.707246	2463.62	25.4779	2527.21	16.4501	2578.67	21.7812	95.5383	2578.67	21.7812
U218		14306	58.527	12.4517	1.03601	0.613237	0.174038	1.13693	1.83601	2.32911	0.0765465	2.03276	0.488141	1034.32	10.8787	1058.43	15.3273	1108.5	40.9249	93.3081	1108.5	40.9249
U219		12681.6	65.8409	11.6787	0.81124	0.0282221	0.155458	1.16117	1.51529	2.10952	0.0707258	1.76118	0.550441	931.485	10.0833	936.578	12.9196	948.578	36.3799	98.198	931.485	10.0833
U220		18194.7	189.605	15.4267	0.0535501	0.150447	0.08682	1.15701	0.708804	1.95514	0.0592381	1.57604	0.591779	536.702	5.96516	544.036	8.2429	574.879	34.5707	93.3592	536.702	5.96516
U221		109755	36.5447	36.1019	1.70585	0.0663367	0.654482	1.14485	23.7818	1.57329	0.263658	1.07915	0.727679	3245.69	29.2462	3259.49	15.4897	3267.99	18.5499	99.3177	3267.99	18.5499
U222		11290.9	75.8618	9.13877	0.473594	1.39669	0.110708	1.23131	1.01221	3.00589	0.0663414	2.74212	0.409631	676.86	7.91988	709.99	15.3608	816.226	57.505	82.9255
U223		528418	417.983	166.539	0.52104	b.d.	0.370121	1.08093	8.63502	1.4906	0.169283	1.02639	0.725166	2029.97	18.8548	2300.25	13.6543	2549.82	18.4132	79.6124
U224		14207.9	100.534	13.7425	0.475547	0.0582251	0.131045	1.15942	1.22928	2.04675	0.0680651	1.68669	0.56647	793.826	8.67008	814.013	11.4733	869.605	35.2833	91.2858	793.826	8.67008
U225		8033.1	37.8885	8.78647	1.57704	0.0476075	0.174314	1.211	1.74397	2.44875	0.072594	2.12834	0.494539	1035.84	11.6013	1024.93	15.8181	1001.73	43.4928	103.405	1001.73	43.4928
U226		246467	170.939	76.4584	0.775389	5.18138	0.320944	1.34248	7.90761	1.97496	0.178777	1.44852	0.679749	1794.34	21.0485	2220.55	17.8661	2640.81	24.9671	67.9465
U227		30880.3	304.051	32.1068	0.54751	0.00348371	0.0994068	1.10368	0.821378	1.72434	0.0599544	1.32486	0.640055	610.932	6.44136	608.817	7.90666	600.955	29.0454	101.66	610.932	6.44136
U228		22976.8	159.654	18.3798	0.647197	1.60386	0.099764	1.18276	0.923451	2.67067	0.0671636	2.39448	0.44287	613.026	6.92429	664.183	13.027	841.915	50.0676	72.8132
U229		573167	594.825	256.256	0.600622	0.234951	0.369754	1.06057	7.31629	1.44638	0.143573	0.983468	0.733257	2028.24	18.4874	2150.8	13.0029	2269.97	18.0725	89.351
U230		179397	119.41	69.0369	0.599391	0.0148293	0.4961	1.09854	12.0722	1.50681	0.176567	1.03135	0.729053	2597.01	23.5236	2610.03	14.2405	2620.14	18.4116	99.1174	2620.14	18.4116
U231		23907.3	126.088	20.9492	0.389407	0.0448844	0.161653	1.09316	1.60657	1.83888	0.0721124	1.47867	0.594474	965.959	9.82006	972.774	11.5274	988.199	30.4838	97.7494	965.959	9.82006
U232		215999	346.467	122.547	0.432423	0.00639881	0.330544	1.03666	5.19552	1.46062	0.11405	1.02896	0.709735	1841.02	16.6309	1851.88	12.5007	1864.11	19.4606	98.7612	1864.11	19.4606
U233		17391.4	116.862	15.2609	0.433439	0.021791	0.125148	1.19906	1.1567	1.99166	0.0670641	1.59028	0.602039	760.125	8.6071	780.401	10.8591	838.829	33.4603	90.6174	760.125	8.6071
U234		23719.9	113.443	21.3046	0.54282	0.0130983	0.176916	1.12326	1.78089	1.81785	0.0730409	1.42929	0.617904	1050.1	10.8992	1038.51	11.8418	1014.18	29.3836	103.542	1014.18	29.3836
U235		21585.1	192.028	20.0155	0.241855	0.0330002	0.105861	1.04809	0.901583	1.75383	0.0617967	1.40621	0.597602	648.663	6.47704	652.573	8.45488	666.118	30.4689	97.3797	648.663	6.47704
U236		37175.4	239.713	35.0774	0.592038	0.019387	0.134817	1.19602	1.25427	1.76884	0.067506	1.3032	0.676159	815.285	9.16991	825.331	10.0089	852.489	27.5016	95.6359	815.285	9.16991
U237		35915.7	256.947	37.6708	1.09549	0.0376249	0.11908	1.06561	1.09252	1.6865	0.0665707	1.3072	0.631846	725.266	7.3199	749.726	8.95532	823.433	27.7026	88.0783
U238		6009.12	51.5955	6.25368	0.655153	0.0786705	0.110967	1.25081	0.954979	2.64873	0.0624446	2.33479	0.472229	678.36	8.06196	680.692	13.1459	688.412	50.0318	98.5398	678.36	8.06196
U239		122037	99.7047	54.1615	0.867748	0.00651392	0.444721	1.06646	9.85723	1.49517	0.160828	1.04795	0.71327	2371.74	21.2005	2421.52	13.8814	2463.62	18.8566	96.2705	2463.62	18.8566
U240		11415.8	99.2369	12.3757	1.17088	0.250282	0.100034	1.16322	0.924837	2.50867	0.0670827	2.22269	0.463681	614.61	6.82698	664.915	12.2473	839.405	46.5279	73.2196
U241		9767.38	85.7779	10.567	0.717822	0.0338368	0.111487	1.18571	0.948181	2.27416	0.0617108	1.94059	0.521383	681.378	7.6755	677.155	11.248	663.138	41.8347	102.751	681.378	7.6755
U242		10517.4	47.3093	10.6563	1.17809	0.0300204	0.184116	1.19848	1.9009	2.13127	0.074914	1.76237	0.562333	1089.42	12.027	1081.4	14.1996	1065.29	35.7895	102.265	1065.29	35.7895
U243		55109.3	242.26	46.4748	0.558682	0.039864	0.177257	1.12927	1.87098	1.67764	0.0765877	1.24065	0.67313	1051.97	10.9754	1070.88	11.125	1109.58	25.2905	94.8084	1109.58	25.2905
U244		21880.6	113.104	16.1017	0.448321	2.01684	0.129907	1.13987	1.25771	2.51842	0.070249	2.2457	0.452611	787.336	8.45867	826.877	14.2564	934.719	46.3235	84.2324
U245		181633	220.596	55.4069	2.26342	11.5613	0.101134	1.55157	0.931563	8.04127	0.066836	7.89016	0.192951	621.05	9.19243	668.457	39.381	831.729	164.557	74.6697
U246		37281.7	167.214	33.0109	0.563487	0.0446916	0.183853	1.07827	1.86638	1.70922	0.0736589	1.32618	0.630857	1087.99	10.8106	1069.25	11.3238	1031.23	27.2609	105.504	1031.23	27.2609
U247		10108.3	49.9028	6.85599	1.10796	5.26174	0.101143	1.27215	0.975621	4.20623	0.0699906	4.00924	0.302444	621.103	7.53997	691.357	21.0964	927.153	82.4822	66.9903
U248		14496.6	79.1457	13.3274	0.504322	0.0398612	0.159697	1.11216	1.54852	2.05982	0.0703579	1.73377	0.539928	955.093	9.88592	949.902	12.7247	937.894	35.8809	101.834	955.093	9.88592
U249		183965	217.263	94.197	0.537839	0.00679031	0.390451	1.05656	7.03312	1.47199	0.1307	1.0249	0.717777	2124.92	19.1597	2115.62	13.1646	2106.6	18.9845	100.87	2106.6	18.9845
U255		168066	150.458	68.4322	0.433466	0.00559537	0.409084	1.18857	9.06588	1.60733	0.160802	1.08203	0.739473	2210.73	22.2758	2344.67	14.7854	2463.35	19.3986	89.7448	2463.35	19.3986
U256		60012.6	294.116	49.4713	0.12802	0.00345511	0.175256	1.0775	1.77988	1.59644	0.0736907	1.17797	0.674937	1041.01	10.3729	1038.14	10.4028	1032.1	24.3185	100.863	1032.1	24.3185
U257		16237.2	68.3477	13.2222	0.547611	0.295245	0.177703	1.17015	1.91752	2.10905	0.078296	1.75466	0.554825	1054.41	11.396	1087.2	14.0942	1153.5	35.1939	91.4097	1153.5	35.1939
U258		39796.9	182.875	33.9916	0.496749	0.0110946	0.175251	1.10532	1.79615	1.71814	0.0743661	1.3154	0.643322	1040.98	10.6397	1044.06	11.229	1050.51	26.974	99.0925	1050.51	26.974
U259		15265.9	163.002	15.8749	0.488604	0.195674	0.0922943	1.1075	0.768524	2.0623	0.0604194	1.73969	0.537021	569.092	6.04016	578.916	9.10823	617.658	37.8362	92.1371	569.092	6.04016
U260		143655	241.112	51.7188	0.0156735	0.119516	0.209909	1.05536	4.99597	1.54025	0.172696	1.12187	0.685187	1228.33	11.8214	1818.64	13.0897	2583.19	19.8704	47.5511
U261		9973.63	66.4025	8.22771	0.241161	0.196081	0.124334	1.20709	1.15092	2.28536	0.0671657	1.94057	0.528182	755.463	8.61452	777.677	12.428	841.98	40.6733	89.7245	755.463	8.61452
U262		12993.6	92.2679	13.6114	0.873024	0.0367345	0.127608	1.14571	1.14781	1.99188	0.0652655	1.6294	0.575188	774.207	8.36844	776.206	10.8214	781.961	34.5665	99.0084	774.207	8.36844
U263		45652.2	232.334	43.4923	0.776603	0.0255459	0.165151	1.06996	1.62475	1.6324	0.0713836	1.23285	0.655454	985.341	9.79079	979.83	10.2818	967.5	25.6356	101.844	985.341	9.79079
U264		6855.94	43.271	6.39826	0.44047	0.0595885	0.142748	1.25055	1.32126	2.61947	0.0671604	2.30169	0.477405	860.183	10.0807	855.065	15.1506	841.815	48.1462	102.182	860.183	10.0807
U265		33549.7	152.515	21.6347	0.662254	4.6794	0.116906	1.1279	1.13802	2.98128	0.0706331	2.75968	0.378329	712.731	7.62	771.571	16.1213	945.893	56.7227	75.3502
U266		111136	83.8222	51.2873	1.11269	b.d.	0.479864	1.08126	11.1064	1.55028	0.167939	1.11097	0.69746	2526.67	22.6423	2532.1	14.5433	2536.45	19.7602	99.6146	2536.45	19.7602
U267		35305.3	301.927	34.5245	0.350748	0.0029735	0.113073	1.04254	0.973518	1.64082	0.0624713	1.26705	0.635379	690.568	6.83725	690.275	8.23193	689.321	27.4286	100.181	690.568	6.83725
U268		8089.36	39.5196	6.60162	0.358334	0.12596	0.162355	1.30172	1.64057	2.50776	0.0733199	2.14346	0.519075	969.854	11.7324	985.932	15.8345	1021.9	43.6675	94.9072	1021.9	43.6675
U269		22031.1	129.11	20.8191	0.889976	0.190217	0.136252	1.12454	1.3332	1.91763	0.0709982	1.55329	0.586421	823.434	8.70397	860.275	11.1413	956.442	32.1311	86.0935
U270		18462.6	168.541	17.3307	0.156194	0.0503808	0.107178	1.07968	0.903507	1.91383	0.0611673	1.5802	0.564148	656.339	6.74672	653.6	9.23452	644.155	34.2755	101.892	656.339	6.74672
U271		4817.3	41.0088	4.30108	0.0343556	0.0460761	0.113049	1.33129	0.981934	2.70288	0.0630245	2.35228	0.492545	690.432	8.72436	694.596	13.6054	708.101	50.2439	97.5047	690.432	8.72436
U272		109243	347.224	56.7646	0.903854	9.21994	0.116843	1.18387	1.08593	3.6532	0.0674364	3.45606	0.324065	712.367	7.99334	746.525	19.3177	850.345	71.9971	83.7738
U273		16545.2	77.3496	15.7544	0.877198	0.00356381	0.177223	1.12728	1.80162	1.99023	0.0737625	1.64021	0.566405	1051.79	10.9543	1046.04	13.0148	1034.07	33.5081	101.713	1034.07	33.5081
U274		9343.83	47.7408	7.43237	0.100862	0.202422	0.162427	1.21805	1.57809	2.26088	0.0704965	1.90472	0.538748	970.25	10.984	961.617	14.0673	941.928	39.3323	103.007	970.25	10.984
U275		330475	224.351	139.069	0.940485	0.979156	0.483577	1.08902	11.6489	1.54073	0.174788	1.0899	0.70682	2542.83	22.9232	2576.6	14.5137	2603.28	19.3432	97.6778	2603.28	19.3432
U276		4790.35	26.7838	4.56874	0.726732	0.103164	0.152728	1.39087	1.46457	2.92506	0.0695803	2.57322	0.475502	916.236	11.8896	915.894	17.6606	915.068	53.1685	100.128	916.236	11.8896
U277		256873	202.702	100.544	0.152257	0.0913325	0.473538	1.05856	10.633	1.45544	0.162927	0.998873	0.727316	2499.06	21.9702	2491.59	13.6137	2485.51	18.0553	100.545	2485.51	18.0553
U278		4983.12	28.0137	4.49896	0.457138	0.101571	0.153251	1.3603	1.45354	2.76658	0.0688202	2.40906	0.491691	919.163	11.6633	911.338	16.6536	892.427	49.9784	102.996	919.163	11.6633
U279		11693.2	81.9051	12.9803	1.05343	0.0214169	0.132099	1.12628	1.18823	2.16229	0.0652671	1.84581	0.520872	799.828	8.48264	795.138	11.9343	782.015	39.0756	102.278	799.828	8.48264
U280		11349	103.096	11.8896	0.640605	0.051229	0.105713	1.19298	0.900472	2.13815	0.0618068	1.77439	0.55795	647.802	7.3607	651.98	10.2963	666.468	38.2777	97.1994	647.802	7.3607
U281		22110.9	134.165	22.4147	0.880335	0.0070662	0.144511	1.0978	1.37574	1.76953	0.0690763	1.38783	0.620392	870.119	8.94769	878.618	10.4217	900.093	29.0296	96.6699	870.119	8.94769
U282		50788.6	212.698	41.1129	0.718152	b.d.	0.178744	1.09883	1.9392	1.61876	0.0787198	1.18867	0.678813	1060.11	10.7564	1094.72	10.8699	1164.21	24.0984	91.0586	1164.21	24.0984
U283		24381.4	131.292	18.2142	0.106633	0.832554	0.142391	1.09283	1.39048	1.92342	0.0708561	1.5828	0.568171	858.167	8.79287	884.901	11.3761	952.345	32.7473	90.111	858.167	8.79287
U284		127397	91.0313	59.2189	1.40467	b.d.	0.48045	1.06745	11.599	1.52456	0.175173	1.0885	0.700169	2529.22	22.3726	2572.59	14.3584	2606.94	19.3168	97.0188	2606.94	19.3168
U285		15909.2	157.308	16.0865	0.336098	0.0375055	0.10142	1.11813	0.83227	1.95785	0.0595432	1.60715	0.571103	622.728	6.64554	614.871	9.03958	586.041	35.1775	106.26	622.728	6.64554
U286		32327.1	199.569	33.8032	1.15833	0.0270877	0.135884	1.0768	1.33103	1.69107	0.0710747	1.30392	0.636758	821.344	8.31563	859.33	9.82204	958.643	27.0951	85.6777
U287		11893.7	135.295	12.748	0.388992	0.0236312	0.09257	1.14295	0.744187	2.08156	0.0583318	1.7397	0.549085	570.719	6.25008	564.846	9.02611	541.265	38.3118	105.442	570.719	6.25008
U288		15414.9	154.729	16.0433	0.406841	0.0143923	0.101175	1.10134	0.844152	1.96781	0.0605396	1.63074	0.559677	621.294	6.5316	621.434	9.15586	621.945	35.4784	99.8953	621.294	6.5316
U289		35307.1	382.858	40.4601	0.670188	0.00305827	0.0968414	1.04889	0.788241	1.67315	0.0590598	1.30355	0.626896	595.872	5.97838	590.174	7.49928	568.323	28.7391	104.847	595.872	5.97838
U290		39244.5	217.069	35.3395	0.511795	0.400936	0.151518	1.09205	1.46416	1.9112	0.0701165	1.56847	0.571398	909.466	9.27584	915.726	11.5475	930.842	32.5601	97.7035	909.466	9.27584
U291		148246	127.091	72.9597	1.01412	0.00308849	0.460093	1.06452	10.1234	1.5228	0.159653	1.08891	0.699056	2439.97	21.6635	2446.11	14.1702	2451.22	19.5246	99.5408	2451.22	19.5246
U292		10559.5	67.0066	8.2478	0.530732	2.09392	0.109824	1.2061	1.02494	3.36685	0.0677169	3.14341	0.358228	671.724	7.70225	716.394	17.3106	858.967	65.4262	78.2014
U293		29626.1	137.702	27.2258	0.752936	0.00036436	0.175695	1.11065	1.79702	1.79631	0.0742142	1.4118	0.618295	1043.41	10.714	1044.38	11.7399	1046.39	28.9024	99.7155	1046.39	28.9024
U294		5350.85	52.6864	6.19928	0.896097	0.041604	0.101901	1.27351	0.864348	2.87132	0.0615468	2.57345	0.443528	625.538	7.59935	632.494	13.5236	657.434	55.3815	95.1485	625.538	7.59935
U295		52960	248.375	48.7244	0.726824	0.00345472	0.175226	1.0441	1.77498	1.55576	0.0735004	1.15337	0.671115	1040.84	10.0508	1036.34	10.1288	1026.87	23.8489	101.36	1026.87	23.8489
U296		7770.07	48.303	6.95116	0.494977	0.387659	0.134271	1.23294	1.26502	2.68401	0.0683614	2.38407	0.459364	812.184	9.41862	830.162	15.2314	878.6	49.5701	92.4407	812.184	9.41862
U297		16743.2	160.402	11.5641	0.48867	4.37134	0.0625258	1.13559	0.521866	3.32341	0.0605611	3.12338	0.341693	390.968	4.3129	426.397	11.5753	622.713	67.5251	62.7846
U298		48648.1	181.473	20.8284	0.730751	13.3095	0.0792268	1.39498	0.696232	4.58395	0.063764	4.36653	0.304319	491.506	6.6068	536.538	19.1081	732.86	92.6071	67.0668
U299		49956.3	192.269	35.616	0.299463	0.342355	0.179455	1.1293	1.95438	1.73795	0.0790221	1.32105	0.649786	1064	11.0911	1099.95	11.6977	1171.8	26.6412	90.8002	1171.8	26.6412
Sample Lev 22 (Leviathan 1 borehole, Early Miocene)
U305		9968.64	115.203	10.843	0.424181	0.0402557	0.0916414	1.11863	0.735797	2.3259	0.0582586	2.03924	0.480943	565.238	6.06116	559.95	10.0183	538.518	44.8426	104.962	565.238	6.06116
U306		210720	208.391	99.911	0.950579	0.00691095	0.387287	1.1984	8.39505	1.57474	0.157284	1.0216	0.761011	2110.23	21.5963	2274.64	14.3712	2425.91	18.4855	86.9873
U307		12143.6	90.7687	13.0239	0.390329	0.202178	0.139785	1.19083	1.31438	2.36679	0.0682267	2.04539	0.503142	843.449	9.42552	852.052	13.6605	874.517	42.627	96.4475	843.449	9.42552
U308		6138.68	48.7303	6.55951	0.589757	0.0729095	0.126033	1.23845	1.08518	2.55511	0.062476	2.23491	0.484696	765.194	8.94511	746.161	13.5115	689.483	47.9022	110.981
U309		8849.01	72.4363	8.81394	0.468257	0.0551343	0.116649	1.23948	1.02395	2.45119	0.0636929	2.11471	0.505666	711.249	8.35555	715.897	12.6012	730.496	45.0548	97.3652	711.249	8.35555
U310		6654.37	51.1302	6.90593	0.763261	0.0122232	0.120547	1.19683	1.08894	2.62506	0.0655452	2.33635	0.455924	733.711	8.30925	747.988	13.9039	790.942	49.254	92.7643	733.711	8.30925
U311		25866	297.123	26.1941	0.160821	0.0115382	0.0920238	1.07612	0.740788	1.73553	0.0584101	1.36163	0.620055	567.495	5.85374	562.865	7.50888	544.195	30.1048	104.282	567.495	5.85374
U312		26766.8	125.782	25.137	0.76089	0.082133	0.176278	1.18987	1.80016	1.86402	0.0740982	1.43484	0.638336	1046.61	11.5085	1045.52	12.1885	1043.24	29.3733	100.323	1043.24	29.3733
U313		19203	98.9815	17.424	0.532064	0.0331442	0.164683	1.12899	1.61715	1.91128	0.0712519	1.5422	0.590697	982.75	10.3042	976.887	12.01	963.731	31.8732	101.973	982.75	10.3042
U314		166348	126.732	66.7322	0.456557	0.0501812	0.465171	1.05897	11.4677	1.49394	0.178879	1.05378	0.70884	2462.35	21.7133	2561.96	14.0609	2641.76	18.7354	93.2088	2641.76	18.7354
U315		7504.97	55.6489	7.3896	0.499172	0.0689314	0.126123	1.18871	1.12289	2.28988	0.0646003	1.95717	0.519116	765.711	8.59208	764.356	12.3095	760.398	41.5399	100.699	765.711	8.59208
U316		20187.2	209.446	22.6644	0.587343	0.0158942	0.101097	1.08589	0.830654	1.86419	0.0596178	1.51527	0.582497	620.835	6.43568	613.975	8.59897	588.754	33.187	105.449	620.835	6.43568
U317		14011.4	67.6018	13.8394	0.888033	0.0663205	0.176057	1.10592	1.75405	2.13627	0.0722908	1.82773	0.517688	1045.4	10.6872	1028.66	13.8329	993.226	37.4821	105.253	1045.4	10.6872
U318		29726.2	289.99	31.6546	0.936949	b.d.	0.0928562	1.10377	0.809604	1.68712	0.0632638	1.27595	0.654236	572.407	6.05344	602.232	7.67508	716.156	27.502	79.9278
U319		62443.7	84.2344	37.2168	0.880922	0.00475053	0.37312	1.08419	6.39591	1.59062	0.124379	1.16387	0.681616	2044.06	19.0232	2031.71	14.0353	2019.18	21.4775	101.232	2019.18	21.4775
U320		16852.4	80.606	16.0742	0.664632	0.0390645	0.18213	1.12883	1.82922	1.97263	0.0728753	1.61771	0.572249	1078.6	11.2263	1056	12.97	1009.57	33.1756	106.837	1009.57	33.1756
U321		16173.5	100.368	13.7151	0.814823	1.07683	0.114187	1.12577	1.16128	2.80222	0.0737924	2.56614	0.401741	697.02	7.44683	782.554	15.2975	1034.89	52.0763	67.3523
U322		18293.8	172.917	20.2749	0.674554	0.0182752	0.106639	1.09424	0.891632	1.88549	0.0606684	1.53548	0.580351	653.201	6.80638	647.246	9.03479	626.528	33.4173	104.257	653.201	6.80638
U323		320683	288.073	139.165	0.651787	0.16442	0.411795	1.08501	9.72791	1.53204	0.171409	1.08162	0.708212	2223.12	20.4361	2409.35	14.2009	2570.69	19.2537	86.4795
U324		11343.2	123.606	11.9395	0.335415	0.0421342	0.0960875	1.11625	0.778473	2.13132	0.0587856	1.81563	0.523736	591.439	6.31606	584.612	9.48106	558.184	39.8495	105.958	591.439	6.31606
U325		58590.3	435.333	52.5419	0.424821	0.0520852	0.11472	1.13633	1.03138	1.65895	0.0652338	1.20867	0.684968	700.101	7.54798	719.616	8.56644	780.941	25.8414	89.6484	700.101	7.54798
U326		9442.16	79.2207	9.11193	0.260447	0.0993911	0.116223	1.20756	1.00554	2.38232	0.0627773	2.05359	0.506885	708.787	8.11417	706.62	12.1378	699.737	43.9821	101.293	708.787	8.11417
U327		29674.8	160.279	29.3213	0.824905	0.0310851	0.159244	1.07507	1.57378	1.7206	0.0717091	1.34339	0.62482	952.574	9.53373	959.917	10.7027	976.779	27.8166	97.522	952.574	9.53373
U328		8581.35	47.7569	8.04011	0.636208	0.0604619	0.153355	1.19766	1.49727	2.28784	0.0708429	1.94931	0.523489	919.745	10.2775	929.279	13.9424	951.965	40.1789	96.6154	919.745	10.2775
U329		101223	75.1098	43.1143	0.550121	0.0273442	0.502097	1.08105	11.6522	1.52145	0.168389	1.07058	0.710542	2622.8	23.3368	2576.87	14.335	2540.94	19.1171	103.222	2540.94	19.1171
U330		123675	160.061	72.1071	0.815261	0.000662574	0.383693	1.05102	6.69542	1.49633	0.126616	1.06507	0.702395	2093.51	18.821	2072.02	13.294	2050.71	19.7472	102.087	2050.71	19.7472
U331		14404.8	127.445	17.3768	1.05913	0.0128951	0.114604	1.12776	0.984634	2.01839	0.0623404	1.67394	0.55874	699.43	7.48437	695.979	10.1789	684.848	36.038	102.129	699.43	7.48437
U332		40632.3	378.883	39.7887	0.39693	0.0813815	0.101673	1.12218	0.886285	1.87097	0.06325	1.49708	0.599783	624.207	6.68461	644.371	8.93687	715.693	32.1421	87.2172
U333		15086.5	66.8787	12.3616	0.761904	1.17734	0.158302	1.15925	1.71901	2.40599	0.0787927	2.1083	0.481819	947.331	10.2257	1015.65	15.4605	1166.04	42.0768	81.2433
U334		3543.55	25.4599	3.38026	0.289008	0.177375	0.133728	1.51167	1.17676	3.48093	0.0638499	3.13556	0.434272	809.098	11.5026	789.804	19.115	735.709	66.5501	109.975	809.098	11.5026
U335		1944.14	21.1195	2.57481	1.29167	0.339276	0.0975139	1.6121	0.77564	4.66791	0.0577149	4.3807	0.345358	599.823	9.23908	582.993	20.708	517.969	96.278	115.803
U336		13890.4	100.542	16.1474	1.15823	0.0303672	0.131046	1.12315	1.1842	2.04628	0.0655685	1.7105	0.548873	793.831	8.39951	793.268	11.2778	791.688	36.2007	100.271	793.831	8.39951
U337		27502.9	197.422	20.3282	0.396439	1.54794	0.0954071	1.36845	0.973766	2.72917	0.0740573	2.3613	0.501417	587.436	7.68981	690.403	13.6797	1042.12	47.9076	56.3692
U338		9092.75	92.0716	9.41101	0.334112	0.0519662	0.101677	1.15329	0.84416	2.14557	0.0602413	1.80925	0.537522	624.232	6.86974	621.439	9.98132	611.281	39.3677	102.119	624.232	6.86974
U339		19313.5	168.052	19.2578	0.332062	0.0146254	0.113678	1.08419	0.979714	1.85117	0.062534	1.50045	0.585681	694.074	7.14381	693.458	9.31387	691.464	32.3353	100.377	694.074	7.14381
U340		195454	174.214	96.4832	1.03983	0.00755091	0.441466	1.03841	9.72243	1.45853	0.159798	1.02422	0.711953	2357.2	20.5399	2408.83	13.5281	2452.76	18.4941	96.1039	2452.76	18.4941
U341		50527	323.024	53.3415	0.807429	0.00304235	0.145603	1.0397	1.36188	1.54511	0.067868	1.14297	0.672899	876.266	8.53138	872.681	9.06574	863.594	24.1915	101.467	876.266	8.53138
U342		42931.1	217.992	46.5158	1.03221	0.00320752	0.181902	1.08045	1.83904	1.67811	0.0733578	1.28401	0.643848	1077.36	10.7351	1059.52	11.061	1022.94	26.4538	105.319	1022.94	26.4538
U343		59192.9	302.307	58.4517	0.929463	0.0094062	0.164481	1.06457	1.64805	1.58464	0.0727024	1.17378	0.671806	981.628	9.70758	988.802	10.0365	1004.76	24.3271	97.6981	1004.76	24.3271
U344		7762.45	78.54	9.26664	0.803801	0.0435413	0.105526	1.26794	0.873135	2.58557	0.0600363	2.25332	0.490393	646.715	7.80974	637.268	12.2453	603.912	48.9705	107.088	646.715	7.80974
U345		33304.5	161.408	37.997	1.58407	0.0231189	0.174982	1.08848	1.77191	1.81384	0.0734753	1.45094	0.600098	1039.5	10.4645	1035.22	11.7942	1026.18	29.7653	101.298	1026.18	29.7653
U346		7363.39	79.0554	8.68698	0.650751	0.0107041	0.10139	1.21081	0.828974	2.4617	0.0593254	2.14335	0.491856	622.549	7.19304	613.043	11.3369	578.08	46.8007	107.693	622.549	7.19304
U347		3567.87	29.5467	4.04707	0.809235	0.269246	0.121219	1.37326	1.03631	3.39847	0.0620321	3.10866	0.404081	737.573	9.57895	722.081	17.5683	674.253	66.642	109.391	737.573	9.57895
U348		10880.5	92.6302	11.3978	0.580963	0.0151862	0.115133	1.19371	1.01319	2.21128	0.063854	1.86139	0.53983	702.487	7.9538	710.486	11.3103	735.844	39.6869	95.4668	702.487	7.9538
U349		18204.2	88.035	18.4989	0.991229	0.0147818	0.177731	1.15997	1.81358	1.97401	0.0740403	1.59725	0.587619	1054.57	11.2986	1050.37	12.9396	1041.66	32.6146	101.239	1041.66	32.6146
U350		14914.5	81.4582	11.8774	0.231964	0.807815	0.144289	1.17366	1.40166	2.32385	0.0704857	2.00569	0.505051	868.872	9.55157	889.636	13.7844	941.613	41.388	92.2749	868.872	9.55157
U351		13876.5	110.366	11.792	0.133189	1.21492	0.108804	1.1248	0.9532	2.19038	0.0635673	1.87952	0.513516	665.798	7.12403	679.768	10.8638	726.311	40.1284	91.6684	665.798	7.12403
U352		5858.53	36.9352	5.7347	0.598621	0.156508	0.143463	1.32179	1.35599	2.73981	0.0685822	2.39988	0.48244	864.216	10.7006	870.145	16.0225	885.27	49.8446	97.6218	864.216	10.7006
U353		22079.6	107.736	19.6529	0.499667	0.0155612	0.172602	1.12583	1.76362	1.83708	0.0741399	1.45168	0.612838	1026.43	10.697	1032.18	11.9244	1044.37	29.7032	98.2825	1044.37	29.7032
U354		14759	154.156	15.153	0.188168	0.0363328	0.101806	1.11156	0.835319	1.91153	0.0595351	1.55512	0.581501	624.984	6.62935	616.559	8.84384	585.744	34.0598	106.699	624.984	6.62935
U355		24104.7	240.892	24.4427	0.2597	0.00257446	0.102934	1.09225	0.862638	1.77598	0.0608083	1.40039	0.615013	631.582	6.57998	631.562	8.36261	631.49	30.5121	100.015	631.582	6.57998
U356		44999.4	412.697	46.0669	0.40991	0.00183043	0.108495	1.08256	0.924294	1.64363	0.0618149	1.23676	0.658639	664.003	6.83965	664.628	8.02901	666.75	26.8858	99.5881	664.003	6.83965
U357		10221.5	62.5976	7.94784	0.460009	2.69071	0.114865	1.20016	1.07114	3.59867	0.0676631	3.39264	0.333501	700.941	7.98	739.299	18.9044	857.318	70.6049	81.7598
U358		9615.1	63.184	9.17271	0.280288	0.049568	0.146065	1.16726	1.34993	2.28413	0.0670591	1.96336	0.511028	878.87	9.6016	867.528	13.3362	838.672	41.1651	104.793	878.87	9.6016
U359		20741.9	112.824	18.7966	0.708666	0.645189	0.146236	1.1596	1.443	2.21884	0.0715992	1.89172	0.522615	879.827	9.54847	906.968	13.3219	973.653	38.8841	90.3635	879.827	9.54847
U365		13808.1	123.906	18.2843	1.43156	0.043899	0.114137	1.15638	0.973302	2.02614	0.061875	1.66374	0.57073	696.73	7.64581	690.164	10.1582	668.828	35.9134	104.172	696.73	7.64581
U366		3680.98	19.1422	3.429	0.616682	0.147547	0.16458	1.44136	1.62984	3.48177	0.0718558	3.16942	0.413973	982.181	13.1415	981.799	21.9203	980.944	64.7403	100.126	982.181	13.1415
U367		197533	133.596	80.8542	0.725711	0.0158139	0.504438	1.09301	12.5875	1.51667	0.181061	1.05148	0.720665	2632.84	23.6671	2649.28	14.3799	2661.87	18.6774	98.9095	2661.87	18.6774
U368		4174.7	39.1326	4.34975	0.392545	0.0775664	0.109004	1.35159	0.924451	2.94792	0.061537	2.61982	0.45849	666.959	8.57133	664.711	14.3859	657.093	56.3755	101.502	666.959	8.57133
U369		9847.49	68.4937	10.0128	0.658162	0.0311954	0.133194	1.18006	1.21696	2.1752	0.0662957	1.82728	0.542508	806.059	8.95174	808.382	12.1365	814.786	38.4932	98.9289	806.059	8.95174
U370		284194	217.022	128.242	1.04562	b.d.	0.465551	1.08171	11.4124	1.49562	0.177871	1.03285	0.723253	2464.02	22.1903	2557.44	14.0707	2632.37	18.4215	93.6046	2632.37	18.4215
U371		14207.4	108.802	13.8631	0.351237	0.0648281	0.125409	1.18484	1.12893	2.0677	0.0653178	1.69457	0.573022	761.621	8.52105	767.242	11.1455	783.645	35.914	97.1896	761.621	8.52105
U372		227398	163.543	101.787	0.898764	0.00546094	0.50761	1.09676	12.4856	1.4907	0.178474	1.0096	0.735739	2646.42	23.8473	2641.65	14.1285	2638	18.0562	100.319	2638	18.0562
U373		20759.7	202.426	19.8638	0.0153804	0.0536514	0.106259	1.07235	0.894881	1.83323	0.0611072	1.48688	0.584951	650.987	6.64908	648.988	8.80192	642.043	32.3002	101.393	650.987	6.64908
U374		53224.8	471.037	61.5111	0.870686	0.00173646	0.113324	1.05237	0.981193	1.58516	0.0628242	1.18544	0.663887	692.023	6.91527	694.217	7.9853	701.327	25.6677	98.6733	692.023	6.91527
U375		50046.3	88.7876	29.213	1.04782	0.0342502	0.253596	1.29579	3.84151	1.84633	0.109914	1.31524	0.701819	1457	16.9161	1601.49	14.9149	1797.16	24.6137	81.072
U376		70236.7	486.306	70.0389	0.574938	0.000359345	0.133582	1.04729	1.22089	1.56777	0.0663169	1.16665	0.668016	808.265	7.96748	810.182	8.76839	815.455	24.8468	99.1183	808.265	7.96748
U377		301072	495.648	90.3824	0.779498	17.1602	0.102974	1.55171	1.59875	4.02271	0.112654	3.71138	0.385739	631.814	9.34494	969.723	25.1371	1841.86	67.4259	34.3031
U378		9980.69	93.0602	11.1312	0.567005	0.0400485	0.11274	1.13805	0.955962	2.22696	0.0615259	1.9142	0.511035	688.639	7.44213	681.202	11.0612	656.705	41.3157	104.863	688.639	7.44213
U379		18791	122.688	19.447	0.697008	0.01472	0.143854	1.12533	1.33935	1.90162	0.0675562	1.5329	0.591776	866.418	9.13501	862.945	11.0704	854.035	32.2043	101.45	866.418	9.13501
U380		10489.9	69.8762	10.8302	0.644701	0.0238655	0.14213	1.22427	1.31605	2.28547	0.0671864	1.9299	0.535675	856.697	9.8319	852.784	13.1992	842.62	40.4488	101.671	856.697	9.8319
U381		24544.8	198.441	24.8828	0.36452	0.015801	0.123673	1.05433	1.08383	1.78788	0.0635889	1.44392	0.589711	751.671	7.49132	745.504	9.45569	727.032	30.9709	103.389	751.671	7.49132
U382		5460.04	48.5029	6.11718	0.664409	0.0674319	0.116309	1.28076	0.995747	2.66054	0.0621196	2.33198	0.481392	709.286	8.61072	701.648	13.487	677.267	50.0621	104.728	709.286	8.61072
U383		8106	85.9417	9.25537	0.585358	0.021933	0.100841	1.2037	0.833698	2.5009	0.0599879	2.19217	0.481306	619.338	7.11576	615.662	11.5529	602.164	47.6671	102.852	619.338	7.11576
U384		13768.2	115.593	14.2286	0.472964	0.0243034	0.117714	1.12673	1.03384	2.1234	0.0637265	1.79981	0.530625	717.391	7.65915	720.846	10.9707	731.614	38.4182	98.0558	717.391	7.65915
U385		26842.2	146.46	25.8484	0.624267	0.0795118	0.161445	1.13598	1.58709	1.76811	0.0713298	1.3549	0.642483	964.802	10.1923	965.156	11.0331	965.961	28.091	99.88	964.802	10.1923
U386		39464.7	238.55	38.9424	0.879874	0.0420007	0.138262	1.17353	1.31312	1.81691	0.0689122	1.38708	0.645894	834.825	9.19994	851.496	10.489	895.184	29.0353	93.2573	834.825	9.19994
U387		13753.7	99.3666	14.5784	0.633965	0.038627	0.134865	1.13304	1.23198	2.05579	0.0662822	1.71537	0.551147	815.561	8.69095	815.239	11.5351	814.36	36.1754	100.147	815.561	8.69095
U388		13513.5	36.0142	8.17887	0.786677	5.09747	0.178217	1.29881	2.00457	3.54263	0.081614	3.29596	0.366622	1057.23	12.6771	1117.06	24.0111	1235.39	64.8496	85.5787
U389		46676.8	269.285	33.5834	0.498365	2.11808	0.11048	1.14464	1.10065	2.98496	0.0722872	2.75677	0.383468	675.535	7.34994	753.667	15.8888	993.124	56.2606	68.0212
U390		6981.85	73.2695	8.06353	0.682058	0.0674824	0.100288	1.25284	0.832188	2.53665	0.0602096	2.20567	0.493895	616.097	7.3687	614.826	11.7063	610.144	47.895	100.976	616.097	7.3687
U391		5083.34	58.8779	5.93491	0.640235	0.0979533	0.0927777	1.25573	0.744957	2.60739	0.0582615	2.2851	0.481602	571.944	6.87947	565.294	11.3093	538.627	50.1956	106.186	571.944	6.87947
U392		9204.63	69.1164	9.44545	0.34453	0.0664492	0.135524	1.19447	1.19651	2.22698	0.064061	1.87954	0.536362	819.304	9.20042	798.976	12.3297	742.695	40.0252	110.315	819.304	9.20042
U393		6371.64	50.5582	6.76754	0.759532	0.0703847	0.119031	1.28705	1.05338	2.59523	0.0642123	2.2536	0.49593	724.986	8.83391	730.555	13.5274	747.679	47.8518	96.9648	724.986	8.83391
U394		4546.56	47.8904	4.88773	0.454284	0.186853	0.0981506	1.28161	0.820848	3.05484	0.0606825	2.773	0.419533	603.562	7.39127	608.521	13.9894	627.031	59.9451	96.2571	603.562	7.39127
U395		6206.64	59.2583	6.64143	0.857654	0.934526	0.0952155	1.24552	0.817146	3.1033	0.062271	2.84238	0.401353	586.309	6.98737	606.455	14.1758	682.469	60.8814	85.91
U396		15378.5	69.402	14.3567	0.822788	0.0258956	0.179706	1.16692	1.90397	2.07427	0.0768764	1.71491	0.562569	1065.37	11.4732	1082.48	13.8287	1117.09	34.5894	95.3702	1117.09	34.5894
U397		15897.9	135.661	15.3544	0.287234	0.0685588	0.113012	1.14695	0.996234	1.94435	0.0639632	1.57004	0.589888	690.218	7.51646	701.896	9.86425	739.462	33.5512	93.3405	690.218	7.51646
U398		37110.9	402.3	44.4375	0.827926	0.00584182	0.0970765	1.08287	0.794875	1.72256	0.0594126	1.33963	0.628639	597.253	6.18516	593.934	7.75637	581.272	29.4534	102.749	597.253	6.18516
U399		5128.35	33.0179	5.1938	0.706766	0.106327	0.141756	1.34242	1.31528	2.85438	0.0673244	2.519	0.470304	854.583	10.754	852.446	16.475	846.889	52.6073	100.908	854.583	10.754
U400		773.782	55.4704	1.02366	0.539392	0.217136	0.0175841	2.06632	0.117106	7.05573	0.0483227	6.74638	0.292857	112.37	2.30258	112.445	7.51066	114.035	159.226	98.5392	112.37	2.30258
U401		11182.7	125.537	12.3525	0.426884	0.0447769	0.0955948	1.18699	0.78502	2.1398	0.0595855	1.78039	0.554719	588.541	6.68392	588.343	9.56359	587.582	38.8984	100.163	588.541	6.68392
U402		18394.3	148.381	18.2652	0.294972	0.012666	0.123505	1.13651	1.09949	1.96964	0.0645956	1.60867	0.577015	750.705	8.06382	753.105	10.4861	760.242	34.2499	98.7454	750.705	8.06382
U403		39301.6	352.225	39.1215	0.189263	0.00321743	0.114593	1.09885	0.983482	1.62701	0.0622734	1.19987	0.675382	699.367	7.29244	695.389	8.20505	682.55	26.0447	102.464	699.367	7.29244
U404		85218.5	491.42	50.9915	0.20463	3.27368	0.0961658	1.10964	0.858502	2.28926	0.0647761	2.00235	0.484718	591.9	6.28345	629.305	10.746	766.125	42.4482	77.259
U405		17275.4	150.191	17.541	0.296061	0.021888	0.117167	1.07822	1.01722	1.98722	0.0629946	1.66928	0.542574	714.238	7.29975	712.515	10.1866	707.091	35.8132	101.011	714.238	7.29975
U406		6299.17	55.0077	6.66382	0.434789	0.0638741	0.117275	1.2089	1.00592	2.79807	0.0622372	2.52344	0.432047	714.862	8.18895	706.81	14.2556	681.31	54.1026	104.925	714.862	8.18895
U407		35584.1	235.843	36.5531	0.605727	0.00285359	0.143453	1.07759	1.33357	1.69672	0.0674526	1.31059	0.635102	864.16	8.72717	860.434	9.86279	850.845	27.6596	101.565	864.16	8.72717
U408		106180	154.94	61.9535	0.676926	0.0126642	0.349557	1.09588	6.02104	1.57299	0.124982	1.12843	0.696687	1932.48	18.3274	1978.89	13.763	2027.75	20.8586	95.3019	2027.75	20.8586
U409		30812.4	202.878	31.4241	0.624528	0.010306	0.142709	1.1328	1.33634	1.7889	0.0679454	1.38453	0.633241	859.965	9.13149	861.642	10.4061	865.956	29.1086	99.3082	859.965	9.13149
U410		8109.65	76.6592	10.9726	1.46384	0.0204278	0.110092	1.17033	0.940908	2.50577	0.0620134	2.21567	0.467054	673.282	7.49076	673.357	12.3428	673.611	47.6156	99.9512	673.282	7.49076
U411		5156.68	38.7802	5.54282	0.606788	0.0621308	0.132875	1.31659	1.20352	2.70161	0.0657209	2.35909	0.487335	804.246	9.96405	802.209	14.9926	796.556	49.6851	100.965	804.246	9.96405
U412		29982.7	196.075	36.2056	1.19066	0.0060549	0.151753	1.07312	1.42093	1.66428	0.0679407	1.27209	0.644798	910.782	9.12778	897.753	9.93727	865.814	26.8129	105.194	910.782	9.12778
U413		22524.4	154.188	20.9011	0.231819	0.0254267	0.13765	1.12115	1.27595	1.77925	0.0672592	1.38157	0.630124	831.359	8.75605	835.048	10.1442	844.874	29.1395	98.4004	831.359	8.75605
U414		58191.7	93.9123	41.0832	1.16702	0.0141608	0.351468	1.10824	5.58781	1.59126	0.115358	1.14189	0.696453	1941.61	18.6084	1914.22	13.7664	1884.68	21.3721	103.02	1884.68	21.3721
U415		22355.3	121.693	24.9498	1.37212	0.00462612	0.1577	1.1242	1.55429	1.84333	0.0715146	1.46084	0.609872	943.982	9.88472	952.201	11.4077	971.242	30.1997	97.1933	943.982	9.88472
U416		29440.8	190.376	28.0821	0.280239	0.00511853	0.147931	1.11216	1.38455	1.81246	0.0679116	1.43113	0.613619	889.356	9.25135	882.38	10.7025	864.924	30.0666	102.825	889.356	9.25135
U417		24440.7	217.183	29.412	0.86206	0.0380101	0.118701	1.0941	1.03087	1.7911	0.0630149	1.4181	0.610853	723.082	7.49369	719.362	9.24445	707.777	30.5209	102.163	723.082	7.49369
U418		234627	175.829	106.35	0.929334	0.00336934	0.489225	1.06277	12.0144	1.47546	0.178192	1.02347	0.720299	2567.32	22.5483	2605.53	13.9434	2635.37	18.2732	97.418	2635.37	18.2732
U419		89941.1	59.9089	43.1752	2.12239	b.d.	0.481538	1.10108	12.8346	1.6251	0.193395	1.19522	0.677547	2533.96	23.1101	2667.59	15.4153	2770.52	20.7717	91.4617	2770.52	20.7717
U425		9659.41	107.131	10.9701	0.587759	0.0821379	0.0950597	1.18173	0.78601	2.39135	0.0599965	2.07896	0.494167	585.391	6.62033	588.906	10.6935	602.475	45.2265	97.1645	585.391	6.62033
U426		219775	170.462	90.3434	0.434863	0.00227682	0.472694	1.04685	11.4297	1.47515	0.175449	1.03931	0.709658	2495.36	21.7017	2558.86	13.8829	2609.56	18.5469	95.6238	2609.56	18.5469
U427		10049.1	56.5271	11.3114	1.18145	0.021947	0.162438	1.18428	1.57627	2.20464	0.0704103	1.85955	0.537176	970.313	10.6808	960.901	13.712	939.421	38.4285	103.288	970.313	10.6808
U428		77124.9	57.072	35.6467	0.969667	0.0117402	0.501745	1.13407	12.1386	1.61688	0.175541	1.15247	0.701392	2621.29	24.4657	2615.17	15.2719	2610.44	20.3157	100.416	2610.44	20.3157
U429		7738.17	64.2595	7.9133	0.282786	0.100083	0.123729	1.24797	1.08421	2.48053	0.0635823	2.14374	0.503105	751.992	8.86707	745.688	13.1121	726.812	45.6933	103.464	751.992	8.86707
U430		4594.97	32.9478	4.48221	0.388092	0.0305747	0.132852	1.34317	1.2235	3.20283	0.0668237	2.90758	0.41937	804.115	10.1633	811.376	17.9035	831.346	60.807	96.7245	804.115	10.1633
U431		7540.17	67.5969	8.34477	0.536958	0.11691	0.116515	1.22695	0.993967	2.41862	0.0618993	2.0843	0.507292	710.472	8.26265	700.742	12.2512	669.668	44.8486	106.093	710.472	8.26265
U432		19260.4	141.054	21.2401	0.839552	0.0307746	0.131885	1.10358	1.20863	1.88619	0.0664952	1.52965	0.585085	798.612	8.30028	804.561	10.4948	821.063	32.298	97.2656	798.612	8.30028
U433		13985.8	120.997	15.052	0.481472	0.0291333	0.118793	1.11825	1.03712	1.98996	0.0633479	1.64604	0.561947	723.611	7.66396	722.481	10.2987	718.978	35.2571	100.644	723.611	7.66396
U434		7166.18	73.2874	8.83848	0.90299	0.0182233	0.104797	1.19688	0.865356	2.51392	0.0599158	2.21073	0.476098	642.458	7.32674	633.042	11.8496	599.561	48.0874	107.155	642.458	7.32674
Sample Lev 29 (Leviathan 1 borehole, Late Oligocene)
U435		22992.7	121.523	23.3552	0.773202	0.0242046	0.171012	1.12096	1.72132	1.89503	0.0730349	1.52794	0.591524	1017.68	10.5669	1016.52	12.1907	1014.01	31.3567	100.362	1014.01	31.3567
U436		8410.95	86.876	10.177	0.908395	0.0281025	0.101355	1.2105	0.850004	2.27934	0.0608514	1.93134	0.531075	622.344	7.18897	624.652	10.6422	633.016	41.8409	98.3141	622.344	7.18897
U437		37557.8	52.0076	23.0243	0.928557	0.0245425	0.367305	1.11731	6.4476	1.71128	0.127369	1.29619	0.65291	2016.71	19.3789	2038.78	15.1067	2061.19	23.6443	97.8421	2061.19	23.6443
U438		70732.1	366.937	54.3068	0.972624	3.17657	0.108632	1.25002	0.918514	3.57819	0.0613509	3.35274	0.349344	664.8	7.90399	661.574	17.4004	650.594	72.1291	102.184	664.8	7.90399
U439		333213	303.062	141.649	0.362226	0.00196845	0.426808	1.08371	9.7319	1.46142	0.165447	0.980471	0.741544	2291.31	20.9336	2409.73	13.5557	2511.35	17.7381	91.2385	2511.35	17.7381
U440		20921	211.027	22.8379	0.375365	0.00899133	0.10668	1.11974	0.901368	1.8829	0.0613072	1.51376	0.594691	653.44	6.967	652.458	9.07427	649.064	32.8356	100.674	653.44	6.967
U441		226610	342.247	114.031	0.335016	0.137076	0.31326	1.08057	5.36455	1.46972	0.124257	0.996215	0.735222	1756.73	16.6425	1879.21	12.6433	2017.44	18.6443	87.0768
U442		6791.95	27.8124	5.92913	0.679015	0.613023	0.189105	1.3871	2.09115	3.00563	0.0802371	2.66641	0.461501	1116.53	14.2329	1145.9	20.6604	1201.94	52.7989	92.8939	1201.94	52.7989
U443		17853.7	82.1375	15.1516	0.418909	0.0793303	0.175986	1.14756	1.87013	1.91935	0.0771057	1.53852	0.597888	1045.01	11.0847	1070.58	12.7194	1123.03	31.0858	93.0528	1123.03	31.0858
U444		11996.4	124.4	14.1566	0.643922	0.0309237	0.105115	1.13456	0.882995	2.15338	0.0609521	1.83025	0.526874	644.313	6.96522	642.599	10.2625	636.577	39.6556	101.215	644.313	6.96522
U445		16599.5	132.727	17.7203	0.809967	0.226362	0.114173	1.25585	0.999205	2.4136	0.0635019	2.06114	0.520323	696.935	8.30433	703.406	12.2581	724.128	43.9705	96.2448	696.935	8.30433
U446		14913.3	30.4627	11.5725	1.50827	0.190773	0.284733	1.28144	4.58143	2.23114	0.11675	1.82645	0.57434	1615.16	18.3283	1745.89	18.6336	1906.24	33.3222	84.7298
U447		10145.6	109.912	12.6524	0.928607	0.0356941	0.0983463	1.17375	0.805808	2.17932	0.0594521	1.83623	0.538586	604.711	6.78277	600.1	9.88282	582.716	40.1335	103.775	604.711	6.78277
U448		13747.5	180.284	17.382	0.744224	0.0833779	0.0865174	1.09202	0.687247	2.00302	0.0576373	1.67916	0.545189	534.908	5.61283	531.145	8.29205	515.014	37.1585	103.863	534.908	5.61283
U449		5140.31	145.853	6.4757	0.704629	0.466426	0.0395922	1.30468	0.286207	3.56882	0.0524523	3.32179	0.365579	250.305	3.2059	255.569	8.06537	304.151	75.8277	82.2961
U450		19755.4	56.8569	10.2518	0.496365	9.0366	0.143721	1.32396	1.49484	4.50394	0.0754689	4.30496	0.293955	865.669	10.7349	928.287	27.4088	1080.11	86.5211	80.1462
U451		5064.58	33.5333	5.14496	0.52535	0.0720274	0.145314	1.33773	1.34519	3.01251	0.0671694	2.6992	0.44406	874.641	10.9513	865.479	17.5553	842.094	56.3824	103.865	874.641	10.9513
U452		14136.4	60.8048	9.91592	0.558688	4.11	0.139142	1.2573	1.34432	3.46386	0.0701031	3.22762	0.362976	839.809	9.91024	865.101	20.1772	930.452	66.4312	90.2583	839.809	9.91024
U453		36224	174.312	34.4013	0.628317	0.0100734	0.180565	1.05883	1.88543	1.64075	0.0757656	1.25337	0.645332	1070.06	10.4553	1075.98	10.9106	1087.98	25.6145	98.3526	1087.98	25.6145
U454		5825.68	57.4575	6.33645	0.310283	0.0683267	0.110814	1.29972	0.922011	2.81494	0.0603722	2.49692	0.461722	677.471	8.3662	663.423	13.7188	615.97	54.1125	109.984	677.471	8.3662
U455		58507.2	331.327	43.3374	0.174817	0.797196	0.130592	1.24232	1.4444	1.80692	0.080254	1.3121	0.687536	791.241	9.26014	907.551	10.8589	1202.35	26.3601	65.8079
U456		101346	85.7569	51.4037	1.17538	b.d.	0.519943	1.32219	12.7303	2.06571	0.177654	1.58712	0.640069	2698.94	29.1927	2659.9	19.5311	2630.35	27.2132	102.608	2630.35	27.2132
U457		239394	174.187	117.554	1.47155	b.d.	0.490613	1.08386	12.146	1.49989	0.179634	1.03678	0.722627	2573.33	23.038	2615.75	14.1831	2648.75	18.4646	97.1525	2648.75	18.4646
U458		6710.36	58.6853	7.57941	0.701382	0.0104924	0.117505	1.29646	1.02568	2.59569	0.0633358	2.24873	0.499466	716.186	8.7962	716.764	13.354	718.571	47.9712	99.6682	716.186	8.7962
U459		200757	125.784	77.5115	0.536991	0.00621235	0.530652	1.0539	14.2826	1.4733	0.195294	1.02952	0.715331	2744.2	23.5989	2768.66	14.107	2786.53	18.2129	98.4808	2786.53	18.2129
U460		432270	345.305	183.01	0.719286	0.0198411	0.438428	1.10716	10.3533	1.47819	0.171347	0.979406	0.748998	2343.6	21.79	2466.89	13.7897	2570.09	17.6596	91.1873	2570.09	17.6596
U461		9773.78	117.145	14.1473	1.51037	0.0187052	0.0916589	1.13988	0.736655	2.28786	0.0583154	1.98368	0.498231	565.341	6.17714	560.452	9.8613	540.648	43.6181	104.567	565.341	6.17714
U462		111505	97.4484	55.1661	1.04059	0.00679608	0.450345	1.118	10.6382	1.56126	0.171403	1.08977	0.71609	2396.79	22.4154	2492.05	14.5894	2570.64	19.3818	93.2371	2570.64	19.3818
U463		83029.8	57.6498	34.6279	0.67853	0.00920627	0.506122	1.12534	12.9273	1.579	0.18533	1.10763	0.712692	2640.05	24.4188	2674.37	14.9924	2700.41	19.5021	97.7648	2700.41	19.5021
U464		3410.03	39.1206	4.02278	0.759214	0.0484664	0.0923534	1.39117	0.768159	3.11611	0.060352	2.78833	0.446445	569.441	7.5882	578.706	13.7515	615.248	60.3915	92.5547	569.441	7.5882
U465		27618	249.455	26.4826	0.577193	0.769289	0.0956654	1.09189	0.877655	2.21796	0.0665676	1.93057	0.492296	588.957	6.15382	639.715	10.5357	823.335	40.583	71.533
U466		7762.42	66.9302	7.82942	0.326851	0.0931775	0.11598	1.17144	1.02437	2.53077	0.0640868	2.24333	0.462879	707.382	7.8572	716.107	13.0123	743.547	47.6669	95.1361	707.382	7.8572
U467		14006.7	155.751	18.4802	1.15113	0.00731266	0.0974547	1.15399	0.813599	2.07085	0.0605761	1.71951	0.557255	599.475	6.61377	604.471	9.44192	623.247	37.3701	96.1858	599.475	6.61377
U468		15177.2	136.584	16.0458	0.445921	0.0170314	0.113374	1.13271	0.969212	1.90319	0.0620298	1.52941	0.595164	692.312	7.44469	688.058	9.52277	674.174	33.0365	102.69	692.312	7.44469
U469		90431.6	798.358	73.7342	0.114197	0.474626	0.0959358	1.06732	0.916681	1.68208	0.0693317	1.30009	0.634521	590.547	6.03121	660.603	8.18091	907.698	27.2171	65.0598
U470		46025.5	431.321	44.5399	0.133986	0.00502056	0.108283	1.12299	0.922522	1.67432	0.0618171	1.24186	0.670716	662.771	7.08191	663.693	8.17027	666.825	26.9931	99.392	662.771	7.08191
U471		35391.1	209.287	26.8979	0.721249	3.65947	0.105525	1.08959	0.979034	2.80352	0.0673187	2.58312	0.388649	646.707	6.71343	693.109	14.0903	846.714	53.9369	76.3785
U472		6052.32	63.7973	7.34838	0.742119	0.0376393	0.104376	1.22896	0.875018	2.49335	0.060829	2.16944	0.492895	640.003	7.49538	638.288	11.8227	632.223	46.9458	101.231	640.003	7.49538
U473		60063.4	374.78	45.5459	0.344861	1.83125	0.112984	1.11493	1.03354	1.99694	0.066375	1.65672	0.558317	690.054	7.30546	720.697	10.3172	817.285	34.9449	84.4326
U474		34997.7	247.671	34.4018	0.410278	0.0697454	0.133822	1.05634	1.27602	1.76896	0.0691867	1.41893	0.597153	809.634	8.04885	835.079	10.086	903.383	29.6479	89.6224	809.634	8.04885
U475		39409.6	231.305	25.1013	0.219136	4.66674	0.0996763	1.18296	0.876659	3.01436	0.0638165	2.77254	0.39244	612.512	6.91993	639.177	14.3044	734.601	58.8967	83.3802
U476		77381.6	302.312	42.8037	0.640333	7.14116	0.110397	1.18098	1.31077	3.17778	0.0861518	2.95019	0.371635	675.052	7.57759	850.466	18.3122	1340.72	57.2483	50.3498
U477		18314.5	292.512	24.7598	0.938444	0.00472338	0.0730225	1.09055	0.570604	1.82734	0.0566985	1.46625	0.596794	454.34	4.79039	458.405	6.74811	478.833	32.7167	94.8848	454.34	4.79039
U478		20294.9	144.797	19.1083	0.413335	1.76251	0.123778	1.15207	1.0454	2.48723	0.0612818	2.20432	0.463194	752.275	8.19003	726.601	12.9172	648.173	47.5696	116.061
U479		146736	157.378	68.7183	0.80861	0.0126522	0.359197	1.11449	8.03232	1.53069	0.162257	1.04925	0.728098	1978.37	19.016	2234.66	13.9049	2478.55	18.8584	79.8194
U485		5410.81	61.6635	7.53466	1.48484	0.153359	0.0913275	1.32239	0.742661	2.82986	0.0590042	2.50188	0.467298	563.383	7.1402	563.957	12.2514	566.272	54.6671	99.4898	563.383	7.1402
U486		32411.5	130.958	27.3919	0.974931	2.05552	0.168898	1.09266	1.91769	2.42662	0.0823852	2.1667	0.450279	1006.04	10.1919	1087.27	16.2115	1253.81	42.6986	80.2382
U487		11009.8	101.718	12.0104	0.50331	0.0286148	0.112434	1.1498	0.965834	2.16198	0.0623305	1.83088	0.531827	686.866	7.50042	686.314	10.7955	684.506	39.3648	100.345	686.866	7.50042
U488		47065.4	95.3069	19.0478	0.637817	15.4721	0.133279	1.48323	1.23439	4.71484	0.0672023	4.47546	0.314588	806.544	11.2531	816.335	26.4537	843.115	93.2557	95.6625	806.544	11.2531
U489		17515.1	158.076	17.8381	0.317568	0.0101112	0.11235	1.14679	0.970332	1.8772	0.0626672	1.48618	0.610905	686.383	7.47583	688.635	9.39854	695.997	32.0116	98.6188	686.383	7.47583
U490		4090.78	37.0594	4.17924	0.180806	0.130153	0.116823	1.36996	0.990334	2.96668	0.0615101	2.63143	0.461781	712.253	9.24568	698.89	14.996	656.153	56.6324	108.55	712.253	9.24568
U491		5809.96	8.50989	3.65634	1.17444	0.104314	0.33817	1.69481	5.84372	3.16115	0.125386	2.66843	0.536135	1877.86	27.628	1952.92	27.4399	2033.45	47.5979	92.3485	2033.45	47.5979
U492		303583	426.506	103.972	4.40605	0.241114	0.113719	1.57042	5.36523	5.40029	0.342332	5.1669	0.290804	694.313	10.3437	1879.32	46.2367	3672.52	79.3065	18.9056
U493		4481.51	31.559	4.50043	0.557548	0.164393	0.132301	1.4053	1.20681	2.79942	0.0661864	2.42113	0.501997	800.978	10.5936	803.723	15.5539	811.337	50.8618	98.7233	800.978	10.5936
U494		19784.7	216.405	22.6038	0.465626	0.00497226	0.100437	1.10246	0.825921	1.80507	0.0596677	1.42929	0.610755	616.968	6.49485	611.347	8.30091	590.572	31.3316	104.47	616.968	6.49485
U495		225279	185.09	91.2622	0.347899	0.0025488	0.446553	1.07568	11.079	1.48162	0.180021	1.01887	0.726018	2379.91	21.444	2529.8	13.9054	2652.31	18.1843	89.7295	2652.31	18.1843
U496		294840	484.716	154.227	2.58307	b.d.	0.274241	1.5091	5.60895	1.85187	0.148403	1.07332	0.814909	1562.29	20.9538	1917.47	16.0115	2326.84	19.4489	67.1424
U497		2639.82	29.7242	3.03834	0.619475	0.102658	0.0946894	1.50447	0.791449	3.46375	0.0606479	3.11996	0.434347	583.211	8.39483	591.993	15.5432	625.799	67.417	93.1947	583.211	8.39483
U498		491096	387.113	217.969	0.662209	b.d.	0.538821	1.20445	13.3369	1.57571	0.179599	1.01596	0.764385	2778.51	27.2277	2703.8	14.9966	2648.42	18.1434	104.912	2648.42	18.1434
U499		197868	166.455	96.44	1.16284	0.00609123	0.448674	1.11541	10.7798	1.54616	0.174331	1.07073	0.721406	2389.36	22.3063	2504.33	14.4673	2598.91	19.0488	91.9368	2598.91	19.0488
U500		49268.5	237.381	52.0313	1.20874	b.d.	0.177416	1.10143	1.88304	1.62348	0.0770123	1.19271	0.678436	1052.84	10.7137	1075.13	10.7916	1120.61	24.3166	93.9525	1120.61	24.3166
U501		27753.3	193.044	29.3389	0.537437	0.0185587	0.143301	1.11197	1.3354	1.73121	0.0676167	1.32687	0.642311	863.304	8.99653	861.229	10.0685	855.892	27.972	100.866	863.304	8.99653
U502		38863.9	186.684	36.2866	0.780587	0.0888261	0.169036	1.10687	1.81419	1.88775	0.077875	1.52919	0.586344	1006.8	10.3313	1050.59	12.3773	1142.79	30.818	88.0996
U503		12253.3	93.258	13.0721	0.504562	0.011822	0.133504	1.17044	1.20141	2.14823	0.0652968	1.80137	0.544841	807.826	8.89718	801.239	11.9167	782.97	38.1433	103.175	807.826	8.89718
U504		18664.2	172.131	19.4981	0.310018	0.0535706	0.112831	1.10695	0.964223	1.92492	0.0620072	1.5748	0.575062	689.169	7.2445	685.482	9.60597	673.397	34.0019	102.342	689.169	7.2445
U505		38989.7	312.234	41.0959	0.485319	0.0113915	0.125235	1.076	1.13685	1.75843	0.0658675	1.3908	0.611908	760.625	7.73063	771.013	9.51361	801.227	29.5216	94.9325	760.625	7.73063
U506		15595.3	23.1699	6.50496	1.16787	14.4294	0.17282	1.62349	2.47064	5.05353	0.103731	4.78565	0.321259	1027.63	15.4315	1263.48	36.538	1691.1	88.4368	60.7668
U507		112373	179.58	37.2527	0.762359	b.d.	0.170393	1.23146	3.42595	1.72787	0.145889	1.21205	0.712701	1014.28	11.57	1510.37	13.6193	2297.52	21.7619	44.1466
U508		10020.4	71.8684	11.0769	0.711123	0.0169448	0.139832	1.18638	1.29378	2.19341	0.0671353	1.84487	0.540884	843.71	9.3931	842.974	12.5751	841.037	38.7016	100.318	843.71	9.3931
U509		113775	107.421	52.9668	0.330542	0.00273786	0.455508	1.06887	10.6331	1.52641	0.169378	1.0897	0.700251	2419.69	21.6027	2491.6	14.2676	2550.76	19.4059	94.8618	2550.76	19.4059
U510		13568.4	153.644	16.6644	0.688564	0.0121668	0.0991433	1.15071	0.810999	1.94884	0.0593542	1.57286	0.590455	609.386	6.69894	603.014	8.87102	579.134	34.4783	105.224	609.386	6.69894
U511		3171.27	34.1052	3.47672	0.597697	0.250709	0.0940268	1.39715	0.807393	3.30054	0.0623056	2.99025	0.423309	579.308	7.74699	600.99	14.9765	683.655	64.018	84.7369
U512		17884.5	132.492	18.753	0.458835	0.0141317	0.135731	1.08696	1.22742	1.97105	0.0656162	1.64425	0.551463	820.475	8.38552	813.165	11.0424	793.212	34.8151	103.437	820.475	8.38552
U513		78297.4	51.6952	40.4809	1.63519	0.0618923	0.569136	1.61854	13.9631	2.00344	0.178016	1.18073	0.807877	2904.27	37.8758	2747.21	19.0748	2633.73	20.7282	110.272	2633.73	20.7282
U514		30038.8	311.739	30.6559	0.0865081	0.0192959	0.104575	1.05675	0.867276	1.66562	0.0601759	1.28746	0.634448	641.165	6.45856	634.087	7.86696	608.933	28.2105	105.293	641.165	6.45856
U515		57302.4	565.346	58.3284	0.165198	0.029998	0.106857	1.03522	0.920925	1.53954	0.0625341	1.13952	0.67242	654.467	6.45209	662.849	7.5079	691.467	24.7441	94.649	654.467	6.45209
U516		3481.51	40.5366	4.69746	1.03794	0.0307427	0.0986447	1.34919	0.787729	3.13864	0.0579425	2.83385	0.429865	606.461	7.81595	589.883	14.0483	526.603	62.2866	115.165
U517		23000.9	172.007	22.1741	0.119087	0.0315363	0.135336	1.07084	1.22474	1.76575	0.0656635	1.40399	0.606451	818.236	8.24037	811.941	9.88558	794.723	29.8237	102.959	818.236	8.24037
U518		91459.7	876.731	89.3494	0.0761477	0.00632561	0.108497	1.13181	0.925582	1.58139	0.0618998	1.10444	0.715705	664.016	7.15009	665.308	7.73153	669.686	24.0895	99.1533	664.016	7.15009
U519		6429.27	32.7868	10.4765	3.53501	0.00119658	0.174423	1.27841	1.8011	2.71518	0.0749252	2.39539	0.470839	1036.43	12.2522	1045.86	17.7414	1065.59	48.4247	97.2639	1065.59	48.4247
U520		960612	9638.19	2569.69	6.49082	b.d.	0.10469	1.02043	0.912367	1.40019	0.0632348	0.958769	0.728784	641.838	6.24348	658.315	6.79763	715.183	20.8986	89.7447	641.838	6.24348
Sample Lev 32 (Leviathan 1 borehole, Early Oligocene)
U521		12656.7	82.1446	12.2761	0.179179	0.0417791	0.154064	1.14948	1.44198	2.0463	0.0679127	1.69294	0.561735	923.705	9.90449	906.542	12.2847	864.958	35.4366	106.792	923.705	9.90449
U522		67435.8	228.209	42.1788	0.418806	3.58228	0.160565	1.08486	1.6502	2.309	0.0745727	2.03828	0.469837	959.914	9.68906	989.627	14.6141	1056.1	41.3458	90.8922	1056.1	41.3458
U523		80668.7	114.885	45.5795	0.408898	0.0168048	0.369127	1.12285	6.48377	1.57683	0.127452	1.10707	0.712093	2025.29	19.5452	2043.7	13.9409	2062.33	20.4341	98.2043	2062.33	20.4341
U524		53122.2	145.449	49.5188	1.38288	0.00473636	0.264278	1.09678	3.34813	1.64473	0.0919255	1.22565	0.666845	1511.69	14.8014	1492.35	12.8995	1464.99	23.8968	103.188	1464.99	23.8968
U525		17582.6	196.917	20.8278	0.63112	0.0148676	0.0975118	1.09704	0.813475	1.97461	0.0605314	1.64183	0.55557	599.811	6.29148	604.401	9.00321	621.654	35.7173	96.4863	599.811	6.29148
U526		262485	340.204	140.234	0.474165	0.00302034	0.374937	1.05016	7.10465	1.44974	0.137492	0.999457	0.724378	2052.59	18.4934	2124.63	12.9848	2195.08	18.4339	93.5088	2195.08	18.4339
U527		10898.8	126.475	16.2427	1.59662	0.00726595	0.0963695	1.16649	0.781436	2.09576	0.0588367	1.74113	0.556593	593.098	6.61731	586.302	9.3431	560.077	38.2243	105.896	593.098	6.61731
U528		18194.1	122.956	20.0071	0.643284	0.00972317	0.149836	1.09862	1.38262	1.89186	0.0669546	1.54019	0.580708	900.043	9.24135	881.555	11.1633	835.425	32.4451	107.735	900.043	9.24135
U529		23450.4	231.441	23.9331	0.153366	0.0128838	0.107862	1.10136	0.917083	1.8461	0.0616929	1.48159	0.596588	660.318	6.92145	660.816	8.97838	662.516	32.0833	99.6683	660.318	6.92145
U530		33489.2	188.607	32.6172	0.521481	0.0101964	0.162916	1.11848	1.61349	1.75069	0.0718617	1.34682	0.638882	972.962	10.1144	975.467	10.9945	981.11	27.868	99.1695	972.962	10.1144
U531		17621	147.935	17.1301	0.365698	0.359292	0.111862	1.11562	1.01072	1.99741	0.0655606	1.65681	0.558536	683.555	7.24474	709.24	10.2062	791.434	35.0858	86.3692
U532		20387.7	139.808	19.553	0.391219	0.0574623	0.135933	1.08142	1.32915	1.79002	0.0709482	1.42643	0.604139	821.624	8.35386	858.508	10.3884	955.001	29.5766	86.0338
U533		22631.1	159.556	22.9688	0.421676	0.0192437	0.139207	1.13953	1.28636	1.90064	0.0670492	1.52114	0.599553	840.177	8.98767	839.68	10.8729	838.366	32.0385	100.216	840.177	8.98767
U534		84273.9	415.131	74.9733	0.329577	0.0010855	0.178513	1.07717	1.86103	1.58802	0.0756444	1.16684	0.678308	1058.85	10.5333	1067.35	10.5137	1084.77	23.9267	97.6099	1084.77	23.9267
U535		55568.1	175.327	29.388	0.598031	6.24818	0.132271	1.18315	1.61983	4.10182	0.0888583	3.92748	0.288444	800.808	8.92014	977.923	25.7601	1400.25	75.4551	57.1905
U536		26720.2	148.287	25.0303	0.31706	0.0178337	0.167604	1.07499	1.67186	1.74714	0.0723785	1.37728	0.615282	998.896	9.96174	997.893	11.1213	995.69	28.4198	100.322	998.896	9.96174
U537		89409.2	419.638	92.5071	1.13205	0.0450498	0.177759	1.0865	1.93036	1.57869	0.0787954	1.14533	0.688228	1054.72	10.5862	1091.66	10.5856	1166.11	23.2539	90.4478	1166.11	23.2539
U538		175759	142.318	75.3333	0.417126	0.0140868	0.472684	1.05387	11.5641	1.49322	0.177515	1.05785	0.705773	2495.32	21.8464	2569.77	14.0641	2629.04	18.813	94.9137	2629.04	18.813
U539		399346	315.986	185.722	0.722496	b.d.	0.49823	1.07134	12.2148	1.46098	0.17789	0.993331	0.7333	2606.19	23.0089	2621.05	13.8274	2632.55	17.8111	98.9985	2632.55	17.8111
U545		347379	488.863	175.684	0.133776	0.00163619	0.356486	1.06699	6.23883	1.5038	0.126986	1.05969	0.709527	1965.49	18.1066	2009.91	13.2307	2055.86	19.6481	95.6043	2055.86	19.6481
U546		59485.2	288.788	53.1274	0.684685	0.203247	0.163139	1.07334	1.79293	1.80251	0.079744	1.4481	0.595467	974.2	9.71868	1042.89	11.7707	1189.77	29.0431	81.881
U547		3099.31	30.4959	3.40169	0.397485	0.222522	0.109085	1.36873	0.909436	3.73241	0.0604925	3.47239	0.366714	667.431	8.68566	656.758	18.0559	620.266	75.0673	107.604	667.431	8.68566
U548		5477.13	35.7702	5.49873	0.360013	0.0802364	0.151484	1.36111	1.40436	2.90511	0.0672677	2.56652	0.468522	909.277	11.5533	890.781	17.2401	845.139	53.6062	107.589	909.277	11.5533
U549		4019.25	37.0858	5.37861	1.41787	0.0624371	0.112764	1.35073	0.979239	2.86768	0.0630106	2.52964	0.47102	688.778	8.83146	693.214	14.414	707.63	54.0046	97.3359	688.778	8.83146
U550		15013	151.161	16.4286	0.383963	0.00898049	0.106831	1.28653	0.912687	2.23653	0.0619895	1.82946	0.575234	654.318	8.01252	658.485	10.8456	672.784	39.4083	97.2552	654.318	8.01252
U551		9758.96	93.3928	12.8972	1.58322	0.149104	0.101784	1.20906	0.930833	3.03046	0.0663572	2.77882	0.39897	624.853	7.20802	668.073	14.8412	816.724	58.2649	76.5072
U552		12471.8	25.2816	11.2083	1.95827	0.014445	0.308205	1.29319	4.52095	2.28883	0.106435	1.88849	0.565003	1731.87	19.6621	1734.83	19.0674	1738.41	35.0822	99.6239	1738.41	35.0822
U553		7414.77	61.7927	8.59501	0.80459	0.0217513	0.12306	1.24167	1.08445	2.47246	0.0639421	2.13806	0.5022	748.149	8.77987	745.802	13.0708	738.763	45.4871	101.271	748.149	8.77987
U554		23571.6	171.01	23.3145	0.29412	0.00854672	0.136472	1.10809	1.25652	1.78127	0.0668068	1.39465	0.622081	824.683	8.58923	826.345	10.0871	830.817	29.4697	99.2617	824.683	8.58923
U555
U556		21905.3	160.852	16.8366	0.749346	3.86101	0.085475	1.17098	0.82738	3.08558	0.070236	2.85475	0.379501	528.72	5.95085	612.157	14.1915	934.337	58.7658	56.5877
U557		229250	351.381	120.878	0.162498	0.000938035	0.343292	1.20006	5.81923	1.581	0.122997	1.02927	0.759056	1902.49	19.7966	1949.28	13.763	1999.35	19.2304	95.1552	1999.35	19.2304
U558		20342.5	153.166	22.7762	0.83173	b.d.	0.131665	1.09241	1.23578	1.88824	0.068103	1.54016	0.578535	797.354	8.20433	816.967	10.6119	870.758	32.2723	91.5701	797.354	8.20433
U559		212111	247.252	118.136	0.618814	0.00361922	0.422413	1.03716	8.10734	1.48107	0.139263	1.05729	0.700277	2271.43	19.8923	2243.06	13.4739	2217.28	19.3498	102.442	2217.28	19.3498
U560		11994.1	113.442	14.4338	0.784192	0.0706951	0.113171	1.13635	1.00057	2.13935	0.0641513	1.8126	0.531168	691.14	7.45659	704.1	10.8749	745.673	38.6016	92.6868	691.14	7.45659
U561		15231.9	110.953	14.2398	0.430583	0.357501	0.120992	1.14384	1.13516	2.07333	0.0680759	1.72926	0.551692	736.272	7.96838	770.21	11.2047	869.934	36.1556	84.6354
U562		9301.93	82.2729	10.6626	0.661315	0.0290796	0.11867	1.15491	1.03215	2.23061	0.0631095	1.90835	0.517755	722.903	7.90725	720.001	11.5142	710.968	40.8348	101.679	722.903	7.90725
U563		18215.4	137.538	19.7458	0.57989	0.00413973	0.134337	1.13527	1.21889	1.99501	0.0658361	1.64049	0.569057	812.561	8.67797	809.27	11.1413	800.226	34.6996	101.541	812.561	8.67797
Sample Dol 4 (Dolphin 1 borehole, Middle-Late Miocene)
U564		16896.9	113.885	16.6817	0.320262	0.0405176	0.145288	1.15437	1.36583	1.99547	0.068212	1.62767	0.578498	874.498	9.45177	874.377	11.7125	874.072	34.0492	100.049	874.498	9.45177
U565		23751.6	119.703	23.484	0.667966	0.0111203	0.177481	1.09238	1.82108	1.82746	0.0744511	1.46504	0.597756	1053.2	10.6292	1053.07	11.9996	1052.81	29.9332	100.036	1052.81	29.9332
U566		11644.8	117.47	13.1607	0.706545	0.777902	0.0992763	1.1824	0.833758	3.31988	0.060938	3.10218	0.356159	610.167	6.89145	615.695	15.3325	636.078	66.9212	95.9264	610.167	6.89145
U567		83412.7	118.402	41.9473	0.612259	0.00144228	0.309312	1.1583	6.00985	1.64909	0.140981	1.17382	0.702383	1737.32	17.6642	1977.27	14.4187	2238.52	21.2357	77.6104
U568		3020.37	21.8806	3.38002	0.811556	0.154696	0.1361	1.47654	1.22987	3.40683	0.0655687	3.07023	0.433406	822.569	11.4111	814.281	19.0873	791.695	64.5909	103.9	822.569	11.4111
U569		13038.2	89.2703	14.0759	1.1159	0.173205	0.128325	1.18916	1.30038	2.68807	0.0735283	2.41073	0.442384	778.302	8.72829	845.891	15.4398	1027.64	49.0044	75.7368
U570		18701.8	163.479	21.7034	0.609281	0.0205352	0.123236	1.09762	1.07099	1.84649	0.0630583	1.48484	0.594436	749.163	7.77347	739.227	9.70885	709.242	31.9171	105.629	749.163	7.77347
U571		19609.6	152.696	23.4958	0.924721	0.00603485	0.132717	1.12044	1.2054	1.86159	0.0659024	1.48665	0.601873	803.344	8.47367	803.077	10.3458	802.336	31.4998	100.126	803.344	8.47367
U572		11098.3	84.034	11.0842	0.274406	0.0512787	0.132698	1.13387	1.21385	2.30444	0.0663737	2.00618	0.492038	803.238	8.5739	806.96	12.8413	817.244	42.1906	98.2862	803.238	8.5739
U573		10787.1	92.8135	11.6209	0.390811	0.0236821	0.122588	1.12522	1.07442	2.1361	0.0635944	1.81571	0.526765	745.445	7.93113	740.906	11.2451	727.214	38.7794	102.507	745.445	7.93113
U574		189676	134.427	74.0284	0.483296	0.0254145	0.476941	1.04196	12.9385	1.46272	0.19684	1.02658	0.712344	2513.93	21.7322	2675.18	13.9062	2799.44	18.1561	89.8012	2799.44	18.1561
U575		375654	168.405	78.1283	0.114714	48.0946	0.154518	4.17249	0.546834	23.4568	0.0256785	23.0827	0.17788	926.241	36.0026
U576		215548	311.817	66.5885	0.310849	23.6874	0.129391	1.84522	1.30208	5.05996	0.0730173	4.71152	0.364671	784.391	13.6343	846.638	29.0656	1013.52	95.6145	77.3926
U577		18360.1	85.5995	19.2313	0.949523	0.0323338	0.192138	1.11228	2.02024	2.02853	0.0762926	1.6964	0.548317	1132.95	11.5722	1122.34	13.7987	1101.86	34.2978	102.821	1101.86	34.2978
U578		40518.3	163.724	34.8911	0.487181	0.111395	0.200727	1.13043	2.57716	1.71289	0.0931604	1.28689	0.659959	1179.22	12.1985	1294.18	12.5612	1490.3	24.9562	79.1266
U579		21467.8	208.247	25.3407	0.535128	b.d.	0.115726	1.1099	0.984988	1.86968	0.0617581	1.50461	0.593629	705.917	7.43081	696.16	9.43231	664.779	32.5597	106.188	705.917	7.43081
U580		7068.21	45.3766	6.75297	0.208323	0.0435255	0.152313	1.25729	1.44135	2.49198	0.0686636	2.15155	0.504534	913.914	10.7243	906.28	14.9514	887.722	44.7214	102.95	913.914	10.7243
U581		5092.24	62.815	6.32538	0.609062	0.047484	0.0941779	1.28553	0.753508	2.98531	0.0580541	2.69434	0.430618	580.199	7.13957	570.258	13.0314	530.82	59.1948	109.302	580.199	7.13957
U582		11562	56.9678	10.3187	0.305632	0.113581	0.178889	1.20219	1.88921	2.12572	0.0766287	1.75311	0.565548	1060.9	11.7736	1077.31	14.1326	1110.64	35.376	95.5213	1110.64	35.376
U583		5009.51	44.3868	5.20927	0.604971	0.436151	0.105921	1.35106	0.925614	3.34025	0.0634076	3.05482	0.404478	649.016	8.34884	665.325	16.3094	720.977	64.9991	90.019	649.016	8.34884
U584		23156.9	118.626	23.6144	0.773938	0.00727706	0.176273	1.14244	1.81176	1.82966	0.0745778	1.42916	0.624399	1046.58	11.0507	1049.72	11.9921	1056.24	29.2067	99.0859	1056.24	29.2067
U585		24418.2	238.885	30.6334	0.878806	0.0062175	0.111857	1.07663	0.94622	1.86771	0.0613796	1.52618	0.576445	683.522	6.99189	676.132	9.23166	651.596	33.0862	104.9	683.522	6.99189
U586		168981	121.615	67.3558	0.23169	0.00622961	0.514426	1.09533	12.8577	1.50636	0.181357	1.0341	0.727136	2675.5	24.0275	2669.28	14.3072	2664.58	18.4062	100.41	2664.58	18.4062
U587		8900.4	7.6361	4.00546	0.378352	0.167054	0.479511	1.67038	10.6385	2.6189	0.160982	2.01704	0.637817	2525.14	34.9251	2492.07	24.366	2465.24	34.6842	102.43	2465.24	34.6842
U588		156155	368.234	71.2467	1.76854	1.71038	0.121147	1.82138	2.82982	5.06051	0.169488	4.72137	0.359921	737.163	12.6934	1363.47	37.9782	2551.84	79.3429	28.8875
U589		11996.7	61.8803	12.6377	0.880657	0.0370732	0.176638	1.25941	1.821	2.34613	0.0748032	1.97944	0.536803	1048.58	12.2007	1053.04	15.3942	1062.31	40.1339	98.7074	1062.31	40.1339
U590		52157.4	503.924	53.1592	0.15149	0.00369467	0.109912	1.0888	0.944786	1.62996	0.062371	1.21297	0.667992	672.236	6.95992	675.384	8.05336	685.895	26.3064	98.0085	672.236	6.95992
U591		15250.9	165.651	20.3405	1.01042	0.000547308	0.104538	1.09269	0.877192	1.936	0.0608854	1.59817	0.564407	640.951	6.67553	639.465	9.1962	634.218	34.7133	101.062	640.951	6.67553
U592		30612.3	387.746	34.6396	0.30076	0.00543737	0.0896032	1.08184	0.722238	1.72893	0.0584858	1.34863	0.62573	553.19	5.7427	551.987	7.37154	547.027	29.8105	101.127	553.19	5.7427
U593		58422.8	627.948	64.2739	0.236657	0.000393028	0.104674	1.07224	0.877021	1.58726	0.0607949	1.17033	0.675533	641.74	6.5586	639.373	7.54294	631.016	25.6272	101.699	641.74	6.5586
RM0 (n=24)		28529.5	290	26.2921	0.0248	0.0981265	0.0981	1.05459	0.81255	1.29166	0.0601	0.920603	0.505322	603.264	6.06375	603.877	5.87065	606.174	19.8103	99.5463	603.264	6.06375
RM1 (n=12)		26626.5	290.817	26.8479	0.321397	0.0980883	0.0920475	0.731634	0.749925	1.69124	0.0591125	1.15325	0.603695	567.647	3.97829	568.177	7.35317	570.259	25.1507	99.5824	567.647	3.97829
RM2 (n=12)		61.9869	3.50904	0.0481413	0.234131	0.0980883	0.0140375	20.3824	0.0531575	135.12	0.0273427	134.418	0.0929171	89.8544	18.1758	52.041	69.9057	-1917.75	5822.34	-5.53399
RM3 (n=12)		6880.72	30.6631	5.47366	0.301071	0.0980883	0.1766	1.54679	1.82875	1.94137	0.0751483	1.73939	0.475629	1048.32	14.907	1055.85	12.5901	1071.46	34.8036	97.8673	1071.46	34.8036
RM0
A001	GJ1	30901.2	279.047	25.466	0.0248448	0.0219543	0.09872	0.395467	0.8219	0.804645	0.06041	0.700757	0.49148	606.898	2.31347	609.133	3.70909	617.456	15.8136	98.2901	606.898	2.31347
A002	GJ1	32614.8	300.815	27.2306	0.0245463	0.0143852	0.09797	0.428399	0.8098	0.790764	0.05997	0.664666	0.541754	602.523	2.48524	602.333	3.61596	601.617	15.1024	100.151	602.523	2.48524
A040	GJ1	31375.8	291.329	26.2936	0.0250008	0.0192795	0.09762	0.451105	0.8115	0.881152	0.06032	0.756923	0.511949	600.454	2.60623	603.304	4.02901	614.023	16.9855	97.7902	600.454	2.60623
A041	GJ1	31199.8	290.181	26.3287	0.0248728	0.0258138	0.09818	0.450788	0.8122	0.827879	0.06003	0.694388	0.544509	603.715	2.61792	603.689	3.78981	603.593	15.7121	100.02	603.715	2.61792
A080	GJ1	30954.4	291.402	26.1983	0.0245492	0.0258696	0.09727	0.430206	0.8037	0.949817	0.05995	0.846802	0.452936	598.384	2.47917	598.903	4.31653	600.869	18.8981	99.5863	598.384	2.47917
A081	GJ1	30852.8	290.57	26.2284	0.0249643	0.0164544	0.09768	0.424275	0.8075	0.956872	0.05999	0.857668	0.443397	600.801	2.455	601.075	4.35991	602.105	19.1228	99.7834	600.801	2.455
A130	GJ1	29772.4	283.241	25.8506	0.0246961	0.0203897	0.09879	0.404257	0.8149	0.850474	0.05985	0.748252	0.475332	607.304	2.36539	605.185	3.89913	597.26	16.8453	101.682	607.304	2.36539
A131	GJ1	30184.3	290.942	26.4367	0.0250645	0.00909913	0.09837	0.495519	0.8122	0.973405	0.05991	0.837842	0.509057	604.841	2.87904	603.698	4.4488	599.411	18.714	100.906	604.841	2.87904
A190	GJ1	29319.5	284.048	26.1369	0.0248773	0.0245466	0.09953	0.409556	0.8259	0.928912	0.06021	0.833752	0.440899	611.648	2.41217	611.318	4.28646	610.093	18.599	100.255	611.648	2.41217
A191	GJ1	29491.5	291.974	26.4748	0.0248808	0.0161769	0.09815	0.448921	0.8098	0.850631	0.05987	0.722526	0.527751	603.531	2.6065	602.363	3.88647	597.968	16.3082	100.93	603.531	2.6065
A250	GJ1	29131.3	293.154	26.4753	0.0243003	0.023455	0.09769	0.384425	0.811	0.890273	0.06024	0.802996	0.431805	600.88	2.22885	603.032	4.06894	611.129	17.9529	98.3228	600.88	2.22885
A251	GJ1	29032.1	295.702	26.6136	0.0250409	0.0200456	0.09738	0.463904	0.8082	0.866806	0.06022	0.73222	0.535188	599.042	2.67305	601.424	3.95502	610.414	16.4808	98.137	599.042	2.67305
A300	GJ1	27869	289.07	26.0764	0.0242643	0.0284815	0.09754	0.510239	0.8132	1.00959	0.06049	0.871167	0.505391	600.002	2.94086	604.221	4.61573	620.079	19.355	96.7622	600.002	2.94086
A301	GJ1	28174.2	293.131	26.5624	0.0247698	0.0210369	0.09806	0.476965	0.8092	0.922023	0.05988	0.78907	0.517303	603.022	2.76466	602.018	4.2074	598.24	17.6951	100.799	603.022	2.76466
A360	GJ1	27710.3	290.928	26.405	0.024745	0.0189555	0.09815	0.418487	0.8219	0.924659	0.06076	0.824538	0.452585	603.548	2.43266	609.094	4.25565	629.777	18.3535	95.8353	603.548	2.43266
A361	GJ1	27299.4	287.056	26.0699	0.0253164	0.0225239	0.09821	0.501128	0.8169	0.888618	0.06036	0.733835	0.563941	603.898	2.90689	606.322	4.07772	615.392	16.5028	98.1323	603.898	2.90689
A420	GJ1	26476.3	287.77	26.0305	0.0247348	0.0319851	0.09785	0.462575	0.8069	1.03539	0.05983	0.926315	0.446763	601.786	2.67716	600.688	4.71242	596.544	20.5854	100.879	601.786	2.67716
A421	GJ1	26265.9	284.973	25.9167	0.0251202	0.0130342	0.09843	0.46321	0.8135	0.87802	0.05997	0.745892	0.527563	605.177	2.6952	604.4	4.0202	601.488	16.786	100.613	605.177	2.6952
A480	GJ1	26644.4	294.398	26.8658	0.0243952	0.0267788	0.09878	0.49811	0.812	0.894171	0.05964	0.742582	0.557063	607.267	2.90498	603.575	4.08928	589.735	16.7451	102.973	607.267	2.90498
A481	GJ1	26356.7	292.735	26.5495	0.0251674	0.0256603	0.09816	0.466268	0.8071	1.00172	0.05966	0.886591	0.465466	603.613	2.70604	600.829	4.56114	590.338	19.7657	102.249	603.613	2.70604
A540	GJ1	25774.4	287.136	25.8738	0.0246085	0.022235	0.09749	0.4924	0.81	0.826087	0.06029	0.663296	0.596064	599.682	2.83784	602.452	3.776	612.888	15.0511	97.8452	599.682	2.83784
A541	GJ1	25803.9	289.036	26.1865	0.0247485	0.0191949	0.09801	0.480359	0.8128	0.932478	0.06017	0.799231	0.515143	602.754	2.78289	604.034	4.26512	608.84	17.8802	99.0004	602.754	2.78289
A594	GJ1	25591.1	289.304	26.2288	0.0249291	0.0096876	0.09813	0.498778	0.811	0.953535	0.05996	0.812681	0.523083	603.467	2.89145	602.988	4.355	601.184	18.1816	100.38	603.467	2.89145
A595	GJ1	25912.9	292.051	26.5116	0.0247627	0.00971814	0.09824	0.473249	0.8181	0.858429	0.06042	0.716195	0.551297	604.097	2.74809	606.978	3.94375	617.748	16.1321	97.7902	604.097	2.74809
		28529.5	290	26.2921	0.0248	0.0981265	0.0981	1.05459	0.81255	1.29166	0.0601	0.920603	0.505322	603.264	6.06375	603.877	5.87065	606.174	19.8103	99.5463	603.264	6.06375
RM1
B003	BB	30874.7	301.536	28.0269	0.331331	b.d.	0.09253	1.10564	0.7608	1.74722	0.05966	1.3529	0.6328	570.49	6.04425	574.478	7.67549	590.289	29.6953	96.6458	570.49	6.04425
B042	BB	29181.8	289.602	26.7536	0.324406	0.000895575	0.09201	1.10169	0.7515	1.79714	0.05926	1.41986	0.613021	567.441	5.99187	569.109	7.83916	575.779	31.2036	98.5518	567.441	5.99187
B082	BB	28049.1	286.051	26.2762	0.316232	b.d.	0.09169	1.04081	0.7408	1.77151	0.05863	1.43351	0.587528	565.538	5.64349	562.9	7.66449	552.253	31.6173	102.406	565.538	5.64349
B132	BB	28042.9	284.389	26.3296	0.320735	0.00441928	0.09218	1.10024	0.7514	1.80847	0.05915	1.43528	0.608384	568.394	5.99367	569.04	7.88774	571.621	31.5564	99.4355	568.394	5.99367
B192	BB	28082.1	292.983	27.3519	0.333388	b.d.	0.09277	1.10675	0.7608	1.79841	0.0595	1.41753	0.615402	571.916	6.06472	574.476	7.89975	584.616	31.1092	97.8275	571.916	6.06472
B252	BB	27031.9	295.791	27.3141	0.323319	0.000809883	0.0921	1.08363	0.7477	1.76288	0.0589	1.3905	0.614694	567.965	5.89914	566.881	7.66758	562.536	30.6377	100.965	567.965	5.89914
B302	BB	24790	280.345	25.6142	0.296208	0.000304819	0.09183	1.0771	0.7409	1.78837	0.05854	1.42763	0.602281	566.364	5.84787	562.925	7.73752	549.05	31.5066	103.153	566.364	5.84787
B362	BB	26089.4	295.078	27.2131	0.321317	0.0161566	0.09196	1.10557	0.7495	1.86887	0.05913	1.50678	0.591571	567.147	6.00995	567.932	8.13868	571.076	33.0991	99.312	567.147	6.00995
B422	BB	24354	287.271	26.3571	0.31614	0.000613219	0.09167	1.08201	0.7449	1.89481	0.05896	1.5555	0.571036	565.406	5.86492	565.254	8.22234	564.646	34.185	100.135	565.406	5.86492
B482	BB	24512.3	290.867	26.8511	0.320417	0.00446945	0.0921	1.10018	0.7484	1.84418	0.05896	1.48007	0.596568	567.965	5.98896	567.31	8.02482	564.685	32.5573	100.581	567.965	5.98896
B542	BB	24478.6	294.328	27.0787	0.326195	0.00433173	0.09167	1.09266	0.7517	1.82719	0.0595	1.46449	0.598001	565.401	5.92249	569.194	7.97082	584.374	32.1189	96.7534	565.401	5.92249
B596	BB	24031.8	291.568	27.0079	0.32708	0.00209093	0.09206	1.10957	0.7507	1.80992	0.05916	1.42991	0.613052	567.737	6.03767	568.626	7.88973	572.18	31.438	99.2235	567.737	6.03767
		26626.5	290.817	26.8479	0.321397	0.0980883	0.0920475	0.731634	0.749925	1.69124	0.0591125	1.15325	0.603695	567.647	3.97829	568.177	7.35317	570.259	25.1507	99.5824	567.647	3.97829
RM2
C004	Monastery	74.8107	3.66005	0.0501364	0.241083	6.36051	0.01402	7.46986	0.03959	167.613	0.02049	167.446	0.0445662	89.7636	6.65892	39.4221	64.8102	-2533.51	7165.78	-3.54306
C043	Monastery	68.6506	3.79933	0.044468	0.231443	5.12345	0.01201	7.62999	0.05232	71.7138	0.03162	71.3068	0.106395	76.9422	5.83593	51.7792	36.202	-1001.96	2114.87	-7.67918
C083	Monastery	64.509	3.5189	0.0484921	0.235052	4.78847	0.01448	7.28628	0.06865	67.9037	0.0344	67.5116	0.107303	92.6768	6.70457	67.42	44.2939	-758.172	1898.19	-12.2237
C133	Monastery	73.369	3.64496	0.0533494	0.229853	4.27159	0.0155	6.72235	0.09559	55.4923	0.04474	55.0837	0.12114	99.1653	6.61544	92.696	49.1611	-70.7921	1345.86	-140.08
C193	Monastery	63.7925	3.66927	0.0591775	0.233519	4.39165	0.01703	7.32926	0.06546	85.4062	0.0279	85.0911	0.0858165	108.833	7.90991	64.3864	53.2828	-1389.34	2756.4	-7.83344
C253	Monastery	62.2351	3.36059	0.0406039	0.23837	4.80199	0.0124	8.19706	0.05514	79.5332	0.03227	79.1097	0.103065	79.4316	6.47125	54.5007	42.2034	-941.445	2315.02	-8.4372
C303	Monastery	46.8886	3.27251	0.0457176	0.233808	5.06688	0.0148	8.366	0.01883	288.272	0.009232	288.151	0.0290212	94.6872	7.8638	18.9375	54.0856	-9937.32	68293.1	-0.952844
C363	Monastery	43.3303	3.24213	0.0422885	0.243644	6.94395	0.01357	8.92514	-0.02268	233.424	-0.01212	233.253	0.0382358	86.8967	7.70376	-23.2902	54.9931	0	0
C423	Monastery	60.1447	3.59553	0.0526499	0.234105	5.92502	0.01462	8.10197	0.04676	111.78	0.0232	111.486	0.0724813	93.5737	7.52672	46.3998	50.6986	-2033.05	4212.85	-4.60264
C483	Monastery	69.3199	3.66952	0.0526658	0.23324	3.54393	0.01433	7.21735	0.09432	43.2142	0.04777	42.6072	0.167013	91.6988	6.57156	91.5239	37.8212	86.9662	1010.34	105.442	91.6988	6.57156
C543	Monastery	66.2716	3.3333	0.0454111	0.23227	4.94098	0.01327	8.36461	0.1006	44.2534	0.05499	43.4557	0.189016	84.9892	7.0625	97.3172	41.0668	411	971.808	20.6786
C597	Monastery	50.5208	3.34246	0.0427351	0.223187	6.31228	0.01242	8.97375	0.02331	176.123	0.01362	175.894	0.0509517	79.5943	7.0988	23.3992	40.7401	-4845.42	13526.3	-1.64267
		61.9869	3.50904	0.0481413	0.234131	0.0980883	0.0140375	20.3824	0.0531575	135.12	0.0273427	134.418	0.0929171	89.8544	18.1758	52.041	69.9057	-1917.75	5822.34	-5.53399
RM3
D005	91500	7824.78	31.532	5.59442	0.30261	0.0523369	0.1758	1.25544	1.817	2.65594	0.07502	2.34049	0.47269	1043.74	12.1106	1051.62	17.4096	1068.03	47.3101	97.7264	1068.03	47.3101
D044	91500	7441	29.8563	5.32407	0.303017	0.0151223	0.1764	1.3323	1.856	2.71166	0.07635	2.3618	0.491322	1047.17	12.8894	1065.53	17.9074	1103.31	47.4915	94.911	1103.31	47.4915
D084	91500	7626.89	31.4505	5.5511	0.301375	0.0891697	0.1743	1.26853	1.832	2.90992	0.07627	2.61887	0.435933	1035.86	12.1515	1057.1	19.1282	1101.23	52.6215	94.0645	1101.23	52.6215
D134	91500	7384.51	31.2265	5.57681	0.296056	0.0605571	0.1767	1.30736	1.828	2.62709	0.07506	2.27869	0.497645	1049.04	12.6695	1055.57	17.2576	1069.08	46.0679	98.1258	1069.08	46.0679
D194	91500	6849.09	29.1991	5.22508	0.300557	0.049338	0.1769	1.38482	1.844	2.80304	0.0756	2.43707	0.494042	1050.23	13.4326	1061.14	18.4666	1083.65	49.1287	96.9161	1083.65	49.1287
D254	91500	6895.13	30.5221	5.48157	0.30093	0.0659046	0.1777	1.29686	1.831	2.74721	0.07478	2.42184	0.472065	1054.34	12.6264	1056.76	18.0569	1061.75	48.9814	99.3025	1061.75	48.9814
D304	91500	6605.1	29.9662	5.30239	0.304796	0.0617625	0.1749	1.33115	1.811	2.72622	0.07515	2.37914	0.488278	1039.04	12.7862	1049.61	17.8499	1071.67	48.057	96.9551	1071.67	48.057
D364	91500	6512.16	30.5419	5.47	0.301783	0.0869014	0.1772	1.2903	1.811	2.83972	0.07419	2.52965	0.454377	1051.52	12.5316	1049.62	18.592	1045.66	51.2609	100.56	1045.66	51.2609
D424	91500	6757.12	32.449	5.78494	0.303558	0.0386601	0.1765	1.28895	1.817	2.84392	0.07472	2.53505	0.453229	1047.56	12.4751	1051.64	18.6399	1060.11	51.2601	98.8161	1060.11	51.2601
D484	91500	6383.13	31.0758	5.53244	0.303525	0.0766336	0.1759	1.36747	1.812	2.7638	0.07477	2.40179	0.494781	1044.49	13.1979	1049.98	18.0992	1061.42	48.5824	98.4052	1061.42	48.5824
D544	91500	6208.06	30.4494	5.45992	0.298961	0.0926344	0.1773	1.40855	1.822	2.97809	0.07455	2.62393	0.472971	1052.19	13.6859	1053.28	19.5354	1055.53	53.0764	99.6833	1055.53	53.0764
D598	91500	6081.73	29.6887	5.38119	0.295689	0.0531169	0.1796	1.40924	1.864	2.93458	0.07532	2.57406	0.480219	1064.65	13.8417	1068.39	19.4066	1076.05	51.92	98.9407	1076.05	51.92
		6880.72	30.6631	5.47366	0.301071	0.0980883	0.1766	1.54679	1.82875	1.94137	0.0751483	1.73939	0.475629	1048.32	14.907	1055.85	12.5901	1071.46	34.8036	97.8673	1071.46	34.8036
Sequence 2 (09.2021)
grain	sample	207Pba	Ub	Pbb	Thb	206Pbcc	206Pbd	±2s	207Pbd	±2s	207Pbd	±2s	rhoe	206Pb	±2s	207Pb	±2s	207Pb	±2s	concf	Preferred age	±2s
		(cps)	(ppm)	(ppm)	U	(%)	238U	(%)	235U	(%)	206Pb	(%)		238U	(Ma)	235U	(Ma)	206Pb	(Ma)	(%)	(Ma)	(Ma)
Sample Dol 4 (Dolphin 1 borehole, Middle-Late Miocene)
U006		21209.9	125.459	13.9746	0.609008	1.95099	0.0963958	1.19709	0.949211	2.91993	0.0714494	2.66326	0.409972	593.252	6.79221	677.692	14.4453	969.381	54.5616	61.1991
U007		21917.4	133.196	18.8503	0.660258	0.571133	0.126761	1.16838	1.15793	2.54976	0.0662814	2.26631	0.45823	769.36	8.48333	780.982	13.9025	814.335	47.6167	94.4771	769.36	8.48333
U008		5109.92	32.2575	4.76254	0.760642	0.115707	0.131041	1.36584	1.18375	3.23286	0.065546	2.93016	0.422487	793.802	10.21	793.057	17.8022	790.966	61.6676	100.358	793.802	10.21
U009		8806.98	67.7504	8.11675	0.500259	0.125925	0.113303	1.05825	0.96725	2.50012	0.061943	2.26511	0.423279	691.9	6.95264	687.045	12.4903	671.179	48.6871	103.087	691.9	6.95264
U010		63240.9	408.689	51.514	0.307353	0.0693686	0.124704	0.809497	1.11939	1.31106	0.065132	1.03131	0.617435	757.584	5.80015	762.684	7.05022	777.659	22.1984	97.4185	757.584	5.80015
U011		65102.1	349.538	44.2839	0.0282607	0.00403615	0.135785	0.968963	1.29237	1.41107	0.0690606	1.02578	0.686688	820.782	7.48049	842.348	8.09783	899.623	21.7047	91.2363	820.782	7.48049
U012		19813.5	184.85	18.9929	0.501921	0.0462003	0.097507	0.876844	0.802335	1.83678	0.0597055	1.61397	0.477382	599.782	5.03215	598.145	8.31241	591.943	35.2903	101.324	599.782	5.03215
U013		34300.6	144.131	26.6327	0.474059	0.0920323	0.174612	0.91958	1.75807	1.56276	0.0730563	1.26356	0.588435	1037.47	8.82971	1030.14	10.1389	1014.6	26.0776	102.254	1014.6	26.0776
U014		67224.7	575.854	53.7919	0.073382	0.0903842	0.0992283	0.865431	0.831399	1.27455	0.060795	0.935684	0.67901	609.885	5.04671	614.388	5.8899	631.021	20.6759	96.6505	609.885	5.04671
U015		62331.9	98.4754	33.5209	1.07852	0.861912	0.265807	0.983452	4.33062	1.68035	0.118216	1.36249	0.585268	1519.49	13.3376	1699.21	13.9093	1928.63	25.1038	78.7857
U016		19071.1	161.047	16.0904	0.408187	0.880553	0.095045	1.01132	0.781562	2.32797	0.0596662	2.09682	0.43442	585.305	5.66717	586.374	10.3774	590.515	45.7009	99.1178	585.305	5.66717
U017		141840	189.87	49.821	0.52324	b.d.	0.231319	1.15135	4.10462	1.55943	0.128753	1.05178	0.73831	1341.41	13.9617	1655.22	12.7819	2080.22	19.4749	64.4839
U018		21482	139.684	18.1435	0.350587	0.0615011	0.127578	0.939471	1.14551	1.61721	0.0651501	1.31634	0.580922	774.036	6.86473	775.119	8.78308	778.241	28.0805	99.4596	774.036	6.86473
U019		84055.4	562.323	50.8282	0.1491	2.20672	0.0890409	1.21613	0.788749	1.98844	0.0642751	1.57319	0.6116	549.863	6.41655	590.462	8.91197	749.747	33.5636	73.3397
U020		22850.3	101.631	17.5488	0.360193	0.0179991	0.168742	0.971347	1.67806	1.62619	0.072157	1.30422	0.597314	1005.18	9.05659	1000.25	10.3687	989.458	26.9825	101.589
U021		175780	202.257	88.8452	1.21469	2.62958	0.320579	1.10851	4.82019	2.08228	0.109099	1.76269	0.532353	1792.56	17.3736	1788.43	17.5525	1783.61	32.6386	100.502	1783.61	32.6386
U022		20645.7	87.2436	17.4616	0.884334	0.0483487	0.171037	0.945709	1.7521	1.84258	0.0743298	1.58137	0.513254	1017.82	8.92084	1027.94	11.9315	1049.53	32.2616	96.979	1049.53	32.2616
U023		27778.9	280.555	23.9652	0.0964983	0.0285794	0.0906206	0.86517	0.729431	1.61066	0.0584052	1.35857	0.537152	559.207	4.64383	556.219	6.90823	544.011	30.0396	102.793	559.207	4.64383
U024		57234.5	509.845	49.7501	0.207331	0.0343935	0.100069	0.8702	0.82871	1.387	0.0600893	1.08005	0.627398	614.814	5.11349	612.896	6.39569	605.817	23.8093	101.485	614.814	5.11349
U025		15346.3	64.4623	13.2416	0.972304	0.0805564	0.172482	0.993085	1.74207	2.00646	0.0732849	1.74347	0.494943	1025.77	9.43364	1024.23	12.9621	1020.93	35.6405	100.474	1020.93	35.6405
U026		5184.26	36.7981	4.95411	0.831435	0.387684	0.11709	1.41477	0.988183	3.72064	0.0612365	3.44116	0.380248	713.794	9.56713	697.793	18.7831	646.586	74.0724	110.394	713.794	9.56713
U027		7439.56	60.322	6.29826	0.269446	0.0377972	0.105205	1.06156	0.888641	2.61346	0.0612891	2.38815	0.40619	644.841	6.52326	645.639	12.4937	648.431	51.4983	99.4463	644.841	6.52326
U028		24558	115.203	23.8158	1.42011	0.0109551	0.157174	0.934296	1.54272	1.7295	0.0712196	1.45542	0.540213	941.055	8.19609	947.591	10.6741	962.806	30.1274	97.7409	941.055	8.19609
U029		19831.4	160.046	17.0602	0.00556411	0.0977041	0.115643	0.937145	0.975511	1.75613	0.0612081	1.48518	0.533641	705.435	6.27343	691.3	8.81776	645.587	32.2459	109.27	705.435	6.27343
U030		4353.52	41.2694	4.32059	0.680887	0.242808	0.095384	1.23435	0.768363	3.88624	0.0584501	3.685	0.317621	587.3	6.93604	578.823	17.1502	545.69	80.6459	107.625	587.3	6.93604
U031		46010.6	197.245	37.1594	0.889036	1.41989	0.157954	0.964481	1.47372	2.27084	0.0676985	2.05584	0.424724	945.395	8.49614	919.656	13.7509	858.403	42.948	110.134	945.395	8.49614
U032		128577	98.7323	50.4117	0.792179	0.458947	0.419486	0.986851	9.785	1.43879	0.169253	1.04702	0.685888	2258.15	18.8387	2414.74	13.356	2549.52	18.7366	88.5715
U033		52936.8	273.477	45.1543	0.521044	0.0121221	0.155484	0.860623	1.47578	1.41438	0.0688702	1.1224	0.608483	931.631	7.48201	920.502	8.58346	893.925	23.6707	104.218	931.631	7.48201
U034		106705	392.534	40.0818	0.0927057	7.85637	0.0885967	1.36188	0.766745	3.30562	0.0627953	3.01205	0.411988	547.233	7.15106	577.894	14.572	700.348	64.3078	78.1372
U035		39957.1	332.146	31.502	0.00708419	0.0133306	0.103047	0.850472	0.866788	1.43927	0.0610341	1.16112	0.590906	632.24	5.13291	633.822	6.79929	639.468	25.3986	98.8696	632.24	5.13291
U036		29759.9	236.406	32.0362	1.30269	0.0530489	0.104745	0.96048	0.891917	1.67324	0.0617851	1.37011	0.574025	642.159	5.8806	647.399	8.02167	665.715	29.707	96.4616	642.159	5.8806
U037		19764.2	84.3884	15.0245	0.890966	0.240143	0.147146	1.12146	1.44944	2.50198	0.0714737	2.23657	0.448231	884.944	9.28534	909.64	15.0458	970.075	45.8925	91.2242	884.944	9.28534
U038		22191.2	199.591	21.7577	0.760999	0.00199113	0.096787	0.874593	0.802733	1.66078	0.0601794	1.41183	0.526617	595.552	4.98549	598.369	7.51999	609.06	30.8657	97.7822	595.552	4.98549
U039		18437.6	161.712	17.0553	0.353709	0.0548952	0.104261	0.93954	0.847873	1.81474	0.0590067	1.5526	0.517726	639.334	5.72876	623.481	8.46543	566.364	34.1128	112.884
U045		45366	377.64	37.5268	0.13815	0.0245774	0.103887	0.896854	0.866618	1.43528	0.0605287	1.12057	0.624862	637.146	5.45162	633.729	6.77982	621.559	24.6097	102.508	637.146	5.45162
U046		37451	167.396	25.8718	0.723614	0.0191912	0.136765	0.909366	1.59785	1.58586	0.0847723	1.29924	0.57342	826.344	7.06664	969.369	9.92606	1309.46	25.7516	63.1057
U047		44864.1	372.806	36.2805	0.126872	0.012212	0.102068	0.995873	0.855494	1.52517	0.0608163	1.15515	0.65296	626.519	5.95516	627.66	7.15285	631.775	25.3026	99.168	626.519	5.95516
U048		41007.2	281.2	31.3277	0.415541	0.201187	0.106151	0.873971	0.998204	1.57756	0.0682322	1.31334	0.554003	650.355	5.41779	702.898	8.01618	874.685	27.6186	74.353
U049		13488.5	114.584	11.5681	0.283617	0.0291044	0.101288	0.984527	0.856251	2.0421	0.061339	1.7891	0.482116	621.953	5.84666	628.074	9.57421	650.178	38.6912	95.6589	621.953	5.84666
U050		10295.2	41.4049	8.4197	0.812761	0.0398258	0.177428	1.09896	1.81605	2.31715	0.0742676	2.03997	0.474274	1052.91	10.6904	1051.26	15.1898	1047.84	41.4294	100.484	1047.84	41.4294
U051		16920.4	69.2322	12.4416	0.325697	0.205531	0.176388	1.05909	1.81074	2.1395	0.0744869	1.85898	0.495015	1047.21	10.2522	1049.34	14.0133	1053.78	37.7769	99.3765	1053.78	37.7769
U052		27375.6	222.909	22.9889	0.199073	0.0184414	0.106064	0.882136	0.89096	1.69118	0.0609513	1.44288	0.521611	649.85	5.46415	646.885	8.10281	636.55	31.3917	102.089	649.85	5.46415
U053		34129.9	141.45	14.9041	0.131814	7.54034	0.0941614	1.23315	0.76902	4.22934	0.0592596	4.04557	0.291571	580.102	6.84815	579.201	18.6726	575.669	88.0678	100.77	580.102	6.84815
U054		27875.9	163.396	22.7701	0.459008	0.0429101	0.132745	0.94916	1.21682	1.71319	0.0665124	1.42622	0.554031	803.509	7.1833	808.322	9.56423	821.603	30.1613	97.7977	803.509	7.1833
U055		4366.28	43.9027	4.50946	0.83367	0.147895	0.0899549	1.2217	0.720057	3.67581	0.0580812	3.46684	0.332362	555.271	6.50657	550.7	15.629	531.842	76.0649	104.405	555.271	6.50657
U056		9283.7	14.1876	3.47492	1.21711	12.6852	0.149344	2.00775	1.1305	9.76897	0.054926	9.56042	0.205524	897.283	16.8245	767.992	52.6368	408.207	213.95	219.811
U057		2838.99	13.1678	2.28166	0.775792	0.145378	0.152025	1.60023	1.4503	3.73052	0.0692213	3.36988	0.428955	912.302	13.6217	909.999	22.4287	904.415	69.6221	100.872	912.302	13.6217
U058		214962	239.181	105.819	1.02336	0.245899	0.353938	0.829393	6.53664	1.25503	0.134005	0.941924	0.660852	1953.38	14.0158	2050.85	11.1402	2150.32	17.5528	90.841	2150.32	17.5528
U059		20456.5	142.778	15.0383	0.130033	0.51679	0.108726	0.928373	0.949612	1.92653	0.0633734	1.68809	0.481889	665.344	5.87959	677.901	9.53918	719.832	36.1371	92.4305	665.344	5.87959
U060		13092.4	97.8054	11.1456	0.234799	0.0843372	0.116407	1.08018	0.987818	2.04947	0.0615733	1.7417	0.527055	709.849	7.2705	697.606	10.3521	658.357	37.6317	107.821	709.849	7.2705
U061		15090.8	61.1175	11.6136	0.736073	0.887423	0.166549	1.01476	1.65724	2.6657	0.0722001	2.465	0.380673	993.067	9.35451	992.321	16.8944	990.672	50.3728	100.242	993.067	9.35451
U062		14066	60.0822	10.9091	0.659903	0.388854	0.162518	1.0158	1.62023	2.20032	0.0723382	1.95181	0.461661	970.756	9.16912	978.079	13.831	994.557	39.976	97.6069	970.756	9.16912
U063		10727.1	84.4092	8.51801	0.422643	0.27937	0.0957357	1.08454	0.808563	2.62177	0.0612821	2.38693	0.413666	589.37	6.11657	601.648	11.9086	648.185	51.4744	90.9262	589.37	6.11657
U064		68430.9	107.655	38.6032	1.40633	0.365596	0.267532	1.03901	4.67573	1.70778	0.126814	1.35535	0.608396	1528.26	14.1605	1762.91	14.3355	2053.47	24.6732	74.4233
U065		87350.5	163.835	31.4166	0.447164	15.444	0.144024	1.37348	1.3505	5.07281	0.0680383	4.88334	0.270753	867.379	11.1562	867.776	29.6006	868.788	101.324	99.8379	867.379	11.1562
U066		12359.8	59.521	7.99582	0.260214	0.383308	0.132237	1.13416	1.24152	2.37287	0.0681233	2.08427	0.47797	800.614	8.54975	819.572	13.3565	871.377	43.4479	91.8791	800.614	8.54975
U067		3421.5	17.5818	2.54147	0.258439	0.214895	0.145147	1.44278	1.40159	3.76215	0.0700657	3.4745	0.3835	873.704	11.798	889.608	22.3022	929.356	71.4982	94.0117	873.704	11.798
U068		27179.7	183.558	21.6772	0.252671	0.0219793	0.11938	0.905025	1.04869	1.56484	0.0637397	1.27658	0.578349	726.992	6.23417	728.232	8.14844	732.051	27.4484	99.3089	726.992	6.23417
U069		36260.4	266.651	30.1269	0.289961	0.0146775	0.113209	0.898108	0.97349	1.46456	0.062394	1.15687	0.613227	691.36	5.8994	690.261	7.35057	686.682	25.1258	100.681	691.36	5.8994
U070		39691.6	342.166	30.3517	0.0361124	0.316573	0.0949879	0.898523	0.774496	1.62515	0.0591623	1.35416	0.552887	584.969	5.03439	582.339	7.2131	572.095	29.8091	102.25	584.969	5.03439
U071		19203.5	141.936	17.3195	0.640971	0.0235999	0.111551	0.932849	0.965015	1.77843	0.0627704	1.51414	0.524534	681.749	6.04596	685.891	8.88046	699.502	32.5831	97.462	681.749	6.04596
U072		47498.1	316.679	37.83	0.210074	0.0187061	0.122167	0.969838	1.06803	1.41525	0.0634347	1.0307	0.685277	743.022	6.81792	737.776	7.43842	721.882	22.3681	102.928	743.022	6.81792
U073		65660	493.051	56.9009	0.477693	0.0458275	0.109438	0.862067	0.939649	1.50752	0.0623007	1.23672	0.571844	669.481	5.49349	672.698	7.42952	683.488	26.8154	97.9507	669.481	5.49349
U074		40164.3	317.116	33.5993	0.29525	0.0278269	0.10591	0.885457	0.892454	1.44262	0.0611426	1.13891	0.613783	648.95	5.47742	647.687	6.92187	643.287	24.9145	100.88	648.95	5.47742
U075		59566.2	366.177	31.0056	0.0735736	3.24944	0.0832424	1.05208	0.670783	2.9337	0.0584698	2.73856	0.358619	515.448	5.21906	521.188	11.9646	546.427	60.003	94.3306	515.448	5.21906
U076		19199.5	69.8627	14.5928	1.4395	1.2756	0.150673	1.15727	1.60695	3.31301	0.0773859	3.10431	0.349311	904.735	9.7807	972.922	20.7464	1130.26	62.0305	80.0469
U077		8890.26	41.5336	7.32342	0.617408	0.0718313	0.162186	1.1108	1.57239	2.42316	0.0703461	2.15356	0.458409	968.916	10.0063	959.37	15.0537	937.551	44.4255	103.345	968.916	10.0063
U078		43900.2	55.1708	21.9065	0.663115	0.0403853	0.349518	0.950942	5.70567	1.48946	0.118449	1.14638	0.638449	1932.3	15.9104	1932.23	12.9352	1932.15	21.3523	100.007	1932.15	21.3523
U079		25154.5	202.521	23.2256	0.571213	0.0182242	0.106863	0.896311	0.888384	1.77853	0.0603207	1.53616	0.503962	654.505	5.5894	645.501	8.50708	614.127	33.4985	106.575	654.505	5.5894
U085		22189	165.734	19.8517	0.342166	0.00994222	0.119264	0.951969	1.01517	1.76877	0.061762	1.49074	0.538208	726.326	6.55063	711.48	9.06042	664.916	32.2652	109.236	726.326	6.55063
U086		11150.2	78.7113	8.73751	0.21718	0.0567193	0.113275	1.09548	0.96514	2.26032	0.0618231	1.97711	0.484656	691.739	7.19496	685.956	11.2815	667.032	42.5857	103.704	691.739	7.19496
U087		6703.46	29.6978	5.79361	1.06471	0.0617358	0.160856	1.1586	1.611	2.80152	0.0726697	2.55072	0.413559	961.532	10.362	974.498	17.564	1003.84	52.0057	95.7852	1003.84	52.0057
Sample Dol 8 (Dolphin 1 borehole, Middle-Late Miocene)
U088		3954.57	33.6432	4.05119	1.40838	0.922363	0.090746	1.58406	0.724364	5.00882	0.0579193	4.75174	0.316255	559.948	8.5009	553.24	21.3678	525.724	104.278	106.51	559.948	8.5009
U089		8803.13	58.3388	7.76145	0.677579	0.0819602	0.119994	1.06588	1.0402	2.54558	0.0629003	2.31168	0.418719	730.529	7.37194	724.018	13.1875	703.905	49.4174	103.782	730.529	7.37194
U090		6971.49	38.3085	5.99003	0.308183	0.41551	0.156006	1.27787	1.35905	3.00612	0.0632104	2.72099	0.42509	934.542	11.1282	871.461	17.5946	714.362	57.997	130.822
U091		75256.4	244.809	27.6203	3.92724	b.d.	0.0817025	1.15236	2.1561	1.61053	0.191482	1.12511	0.715517	506.277	5.61746	1167.02	11.1998	2754.2	19.7088	18.382
U092		13531.3	120.7	11.9585	0.489731	0.0293592	0.0941159	0.920725	0.782233	2.12481	0.0603069	1.91496	0.433321	579.833	5.11503	586.756	9.47777	613.633	41.6214	94.4919	579.833	5.11503
U093		27859.6	218.308	22.8602	0.165286	0.0114612	0.108777	0.948756	0.921925	1.65467	0.0614966	1.35565	0.573382	665.644	6.01078	663.377	8.07195	655.683	29.4474	101.519	665.644	6.01078
U094		14671.9	127.279	13.2421	0.505289	0.0467772	0.0982818	0.996843	0.803048	2.12436	0.0592874	1.87596	0.469243	604.332	5.75957	598.546	9.61573	576.687	41.0313	104.794	604.332	5.75957
U095		20635.4	184.463	18.6115	0.401656	0.0295264	0.098702	0.943344	0.813048	1.76077	0.0597702	1.48674	0.535757	606.797	5.47268	604.162	8.02802	594.289	32.5451	102.105	606.797	5.47268
U096		6227.54	67.7308	6.19473	0.765166	0.116533	0.0814431	1.21377	0.635289	2.9054	0.0565993	2.63972	0.417762	504.731	5.89874	499.385	11.4658	474.961	58.5529	106.268	504.731	5.89874
U097		14876.3	87.7489	13.0924	1.02299	0.0230126	0.121397	1.08099	1.0888	1.88973	0.0650777	1.55001	0.572035	738.601	7.55415	747.92	10.0148	775.904	32.9456	95.1923	738.601	7.55415
U098		15523	63.5003	12.0747	0.569964	0.0275396	0.176341	0.97283	1.77374	1.82338	0.0729846	1.54218	0.53353	1046.95	9.4177	1035.89	11.8604	1012.61	31.6481	103.391	1012.61	31.6481
U099		64979.6	364.984	43.3238	0.353876	0.00517175	0.1157	1.0657	1.09757	1.4939	0.0688318	1.04691	0.713369	705.769	7.13429	752.173	7.95365	892.776	22.151	79.0533
U100		26503.8	143.046	20.6123	0.284903	0.0532182	0.144111	0.92849	1.33011	1.6559	0.0669708	1.3711	0.560716	867.868	7.55348	858.93	9.61564	835.929	28.9632	103.821	867.868	7.55348
U101		199827	109.245	71.243	1.05201	0.652278	0.497018	0.85797	11.8054	1.30692	0.172347	0.985861	0.656483	2600.97	18.4153	2589.1	12.36	2579.82	17.7496	100.82	2579.82	17.7496
U102		4506.17	19.6099	3.58022	0.778152	0.451901	0.159931	1.52087	1.52571	3.68804	0.06922	3.35985	0.41238	956.395	13.5277	940.774	22.6301	904.377	69.4163	105.752	956.395	13.5277
U103		88899.1	553.106	74.059	0.733189	0.0134037	0.119577	0.961825	1.11448	1.36989	0.0676268	0.97544	0.70212	728.128	6.63373	760.328	7.34955	856.205	20.819	85.0414
U104		13096.9	54.3014	9.71801	0.556684	0.106305	0.164631	1.02732	1.61621	2.09303	0.071233	1.82357	0.490829	982.46	9.37629	976.522	13.1458	963.19	37.5642	102.001	982.46	9.37629
U105		8122.28	70.0748	7.14651	0.366651	0.414838	0.100161	1.10076	0.823532	3.09488	0.0596589	2.89251	0.355671	615.354	6.4687	610.017	14.198	590.249	62.8952	104.253	615.354	6.4687
U106		50892.8	222.949	29.5231	0.162506	1.48832	0.131195	2.18382	1.48812	2.7504	0.0823029	1.67203	0.793998	794.679	16.3328	925.55	16.7148	1251.85	33.1228	63.4801
U107		11665	87.3959	9.49508	0.330307	0.301023	0.107027	1.17339	0.892768	2.73	0.0605253	2.46497	0.429813	655.462	7.32143	647.855	13.0822	621.438	53.3771	105.475	655.462	7.32143
U108		49205.2	265.407	36.8079	0.515725	0.0545711	0.128149	1.09348	1.16514	1.55559	0.0659719	1.10642	0.702935	777.296	8.01793	784.37	8.5167	804.543	23.6503	96.6134	777.296	8.01793
U109		56289.2	220	42.8032	0.692658	0.0101161	0.174525	0.866996	1.78211	1.36719	0.0740917	1.05713	0.634146	1037	8.32334	1038.95	8.9204	1043.06	21.9012	99.4186	1043.06	21.9012
U110		79729.9	54.5801	27.552	0.300322	0.018512	0.467832	0.914733	10.3217	1.36847	0.160087	1.01783	0.668435	2474.05	18.8408	2464.05	12.7782	2455.82	18.3891	100.742	2455.82	18.3891
U111		5314.72	44.962	4.62613	0.478577	0.0622568	0.098036	1.22675	0.813287	3.0602	0.0601938	2.80355	0.400873	602.889	7.068	604.296	13.9427	609.578	60.7763	98.9027	602.889	7.068
U112		17609.7	76.0411	14.5488	0.878217	0.0676366	0.164358	1.06423	1.62691	1.8543	0.0718235	1.51849	0.573928	980.95	9.69832	980.665	11.6798	980.027	31.3207	100.094	980.95	9.69832
U113		7719.78	46.8588	6.2095	0.398339	0.0984748	0.128359	1.07698	1.18468	2.76958	0.0669681	2.5516	0.388862	778.495	7.90876	793.488	15.2591	835.845	53.3743	93.1387	778.495	7.90876
U114		87971.2	40.7124	27.563	0.801128	0.0132161	0.550472	0.969727	15.3246	1.33533	0.201998	0.918006	0.726208	2827.14	22.2456	2835.63	12.8734	2841.68	16.4967	99.4883	2841.68	16.4967
U115		5249.45	42.9503	4.60392	0.38846	0.052097	0.105005	1.17388	0.875126	3.02193	0.060472	2.78462	0.388453	643.675	7.19923	638.347	14.327	619.534	60.269	103.897	643.675	7.19923
U116		30497	120.034	24.4501	0.858323	0.0479892	0.175437	0.935266	1.79809	1.59428	0.0743674	1.29112	0.586639	1042	9.01587	1044.76	10.4269	1050.55	26.4931	99.1863	1050.55	26.4931
U117		22325.3	205.344	19.9656	0.412741	0.0193219	0.0944603	0.848702	0.768035	1.61109	0.0589964	1.36942	0.526789	581.862	4.73222	578.635	7.11711	565.985	30.1667	102.805	581.862	4.73222
U118		238026	277.612	96.2101	0.0702297	0.00255421	0.350763	0.902225	5.83834	1.24248	0.120773	0.854249	0.72615	1938.24	15.1387	1952.12	10.8525	1966.87	16.3428	98.5444	1966.87	16.3428
U119		35911.1	202.839	30.0197	0.578199	0.0311286	0.137191	0.883343	1.25883	1.67084	0.0665787	1.41825	0.528681	828.758	6.88402	827.381	9.47146	823.684	29.9875	100.616	828.758	6.88402
U120		194258	204.193	101.836	1.41747	0.0463469	0.366908	0.894505	6.41216	1.20941	0.126806	0.81396	0.739622	2014.84	15.5156	2033.94	10.713	2053.37	15.5788	98.1235	2053.37	15.5788
U121		32793.8	345.419	19.597	0.338491	3.44383	0.0524483	1.17888	0.528294	2.73116	0.0730867	2.46364	0.431639	329.535	3.79129	430.677	9.59068	1015.45	50.1597	32.4523
U122		123505	192.312	51.2932	0.788609	0.0786217	0.225579	1.86566	4.45265	2.16783	0.143223	1.10399	0.860613	1311.29	22.1476	1722.19	18.013	2265.77	20.0408	57.8739
U123		42577.8	48.8435	21.3015	0.908294	0.0508192	0.361724	0.972946	6.04152	1.56271	0.121189	1.22288	0.622604	1990.34	16.6948	1981.85	13.6806	1973	22.5826	100.879	1973	22.5826
U124		7399.17	29.6408	5.77693	0.891787	0.133182	0.165266	1.21666	1.68689	2.90672	0.0740623	2.63984	0.41857	985.974	11.1361	1003.59	18.5423	1042.26	53.5	94.5997	1042.26	53.5
U125		37085.7	193.135	29.4979	1.28694	4.58496	0.108919	1.65003	0.579338	5.79378	0.0385942	5.55385	0.284794	666.468	10.4536
U126		24016.4	104.214	27.6542	2.67231	0.1773	0.156889	0.919798	1.53187	1.96493	0.0708469	1.73635	0.468108	939.467	8.05674	943.247	12.0884	952.081	35.8577	98.6752	939.467	8.05674
U127		15425.3	96.7909	13.373	0.553262	0.0329838	0.130013	1.00317	1.15324	1.92303	0.0643619	1.64064	0.52166	787.938	7.4523	778.773	10.4713	752.596	34.9592	104.696	787.938	7.4523
U128		14887.7	123.345	14.926	1.05963	0.0813819	0.0994955	1.06121	0.835163	2.09774	0.0609063	1.80952	0.505882	611.452	6.19919	616.473	9.70252	634.957	39.2227	96.2981	611.452	6.19919
U129		30080.6	256.236	34.257	1.64301	0.0318068	0.097658	1.10439	0.821194	1.76382	0.0610144	1.37528	0.626132	600.669	6.34218	608.714	8.0862	638.773	29.9431	94.0348	600.669	6.34218
U135		6278.28	53.3404	5.35835	0.498614	0.0487546	0.0985828	1.3554	0.897687	3.42039	0.0660721	3.14037	0.396272	606.098	7.84741	650.491	16.4347	807.719	65.8912	75.0382
U136		20663.6	26.6089	10.9119	1.02256	0.186871	0.329144	1.09062	5.19713	1.96579	0.11457	1.6355	0.5548	1834.23	17.4379	1852.15	16.7867	1872.32	30.0621	97.9656	1872.32	30.0621
U137		4108.14	37.3357	3.62392	0.417392	0.112156	0.0943267	1.29073	0.772709	3.10264	0.0594395	2.82142	0.416009	581.075	7.17874	581.316	13.7379	582.255	61.4393	99.7974	581.075	7.17874
U138		24772.5	190.043	21.3387	0.496318	0.0217287	0.106304	0.90967	0.897624	1.63512	0.0612689	1.35872	0.556332	651.246	5.64553	650.457	7.86596	647.72	29.5495	100.544	651.246	5.64553
U139		13435.2	110.914	13.0897	0.919434	0.0291735	0.101135	0.996453	0.854817	1.89092	0.061329	1.60707	0.526967	621.057	5.90913	627.289	8.85889	649.827	34.8162	95.5726	621.057	5.90913
U140		5276.36	43.9059	4.80655	0.681473	0.213781	0.0983155	1.20776	0.79991	3.00966	0.0590355	2.7567	0.401295	604.53	6.97688	596.778	13.5873	567.425	60.1864	106.539	604.53	6.97688
U141		4990.27	30.6107	3.56727	0.706882	2.37367	0.100107	1.49775	0.871708	4.8816	0.0631829	4.64615	0.306816	615.038	8.79212	636.494	23.0888	713.435	98.8334	86.2079
U142		117543	156.684	27.7846	0.583773	0.286924	0.127676	4.18267	2.12989	4.30937	0.121043	1.03731	0.970597	774.595	30.5307	1158.55	29.7868	1970.86	19.4148	39.3024
U143		30925.8	71.8095	17.734	0.642213	2.94046	0.215718	0.971238	2.83019	2.95546	0.095197	2.79132	0.328625	1259.21	11.13	1363.57	22.1937	1531.13	52.839	82.2405
U144		9854.02	79.6824	7.92967	0.268858	0.0567167	0.0999025	1.05344	0.831315	2.21429	0.0603786	1.94765	0.475747	613.838	6.17682	614.341	10.2148	616.199	42.3055	99.6169	613.838	6.17682
U145		19571	72.6464	13.5563	0.4584	0.814657	0.174717	0.978539	1.805	2.06269	0.0749613	1.81581	0.4744	1038.05	9.39847	1047.27	13.4963	1066.56	36.8471	97.3266	1066.56	36.8471
U146		52224.8	182.057	43.5677	0.792156	2.67302	0.21162	0.852489	2.1814	3.60802	0.0747949	3.50586	0.236276	1237.44	9.62118	1175.12	25.1325	1062.09	70.7093	116.51
U147		75405.5	105.464	37.5808	0.510578	0.274897	0.322319	1.1655	4.94334	1.58855	0.111283	1.07939	0.733692	1801.04	18.3393	1809.69	13.4722	1819.66	20.4186	98.977	1819.66	20.4186
U148		70398.7	45.957	26.8117	0.762902	0.050385	0.490192	1.01365	11.573	1.41372	0.171307	0.985452	0.717011	2571.51	21.5387	2570.5	13.3281	2569.7	17.7537	100.07	2569.7	17.7537
U149		4293.75	35.9607	3.75109	0.539412	0.0707039	0.0980243	1.28339	0.816303	3.23691	0.0604243	2.97162	0.396487	602.82	7.39288	605.984	14.7772	617.833	64.3115	97.5701	602.82	7.39288
U150		25112.1	108.567	17.5357	0.450485	0.0838992	0.152952	1.04677	1.51939	1.76897	0.0720786	1.42602	0.59174	917.492	8.96533	938.23	10.8511	987.245	29.4312	92.9346	917.492	8.96533
U151		12717.5	78.4681	9.97897	0.346726	0.128958	0.124507	1.02291	1.10908	2.18984	0.0646344	1.93625	0.467117	756.453	7.31231	757.732	11.704	761.51	41.0944	99.3359	756.453	7.31231
U152		14313.9	71.3457	12.1873	0.832191	0.0498093	0.14797	0.98305	1.38117	2.1693	0.0677281	1.93378	0.453164	889.572	8.18223	880.939	12.7904	859.312	40.4252	103.521	889.572	8.18223
U153		10425.4	84.6192	9.43106	0.653612	0.122028	0.100704	1.06945	0.83551	2.3971	0.0602005	2.14531	0.446142	618.532	6.31611	616.665	11.0872	609.816	46.5992	101.429	618.532	6.31611
U154		10823.6	101.484	10.6008	0.440314	1.12873	0.101786	1.38908	0.87586	3.95432	0.0624366	3.70231	0.351281	624.869	8.27925	638.744	18.7522	688.139	79.1316	90.8056	624.869	8.27925
U155		16455.9	106.822	13.8838	0.510682	0.0214805	0.123055	0.960337	1.09219	1.99546	0.0644009	1.74917	0.481261	748.125	6.79509	749.567	10.5894	753.873	37.2236	99.2374	748.125	6.79509
U156		88982.7	247.385	53.2027	0.375688	4.56781	0.19799	0.968182	1.93853	2.60116	0.0710435	2.41426	0.372212	1164.51	10.3337	1094.49	17.4395	957.745	49.5904	121.589
U157		6218.49	32.3011	3.94022	0.0984193	2.81556	0.122177	1.26955	0.906201	3.94713	0.0538181	3.73739	0.321638	743.083	8.91924	655.036	19.0584	362.433	84.4107	205.027
U158		52499.5	303.906	36.3426	1.6913	3.13559	0.0730841	1.66292	0.645104	6.31143	0.0640473	6.08842	0.263477	454.71	7.30497	505.461	25.1325	742.241	128.849	61.2617
U159		5278.65	55.6796	5.49542	0.849747	0.0817662	0.0865632	1.14076	0.68244	2.99834	0.0572038	2.77285	0.380465	535.18	5.86558	528.248	12.3543	498.409	61.2442	107.378	535.18	5.86558
U160		15677.9	83.0256	12.9741	0.684599	0.0430638	0.140384	0.981752	1.31253	2.01968	0.0678399	1.76501	0.486093	846.832	7.80403	851.237	11.6539	862.734	36.9304	98.1568	846.832	7.80403
U161		303906	180.081	105.058	0.840662	0.00318013	0.471188	0.85619	11.1748	1.12787	0.172084	0.734178	0.759125	2488.77	17.7273	2537.82	10.6522	2577.27	13.9402	96.5662	2577.27	13.9402
U162		125839	76.6518	43.1587	0.537979	0.0213824	0.491148	0.889997	11.5668	1.26753	0.170881	0.902513	0.702153	2575.64	18.9474	2569.99	11.9743	2565.54	16.4788	100.394	2565.54	16.4788
U163		41677	271.809	34.311	2.39497	b.d.	0.0918187	0.940352	0.967148	4.78297	0.0764285	4.68962	0.196604	566.284	5.10688	686.992	23.8818	1105.42	93.8751	51.2281
U164		23477.2	33.961	13.047	0.943711	b.d.	0.322016	1.1137	4.74904	1.82056	0.10701	1.44018	0.611732	1799.57	17.5139	1775.94	15.3179	1748.28	26.9747	102.934	1748.28	26.9747
U165		15863	117.001	13.3081	0.39799	0.0192307	0.110848	0.925728	0.951403	1.87706	0.0622775	1.6329	0.49318	677.67	5.96592	678.833	9.3038	682.693	35.1815	99.2642	677.67	5.96592
U166		9947.39	54.8415	7.81752	0.471516	0.0427418	0.135359	1.07636	1.2472	2.16152	0.0668565	1.87447	0.497963	818.363	8.28392	822.14	12.1939	832.369	39.3655	98.3174	818.363	8.28392
U167		11774.6	64.1299	10.2174	0.819492	0.0599491	0.138374	1.02242	1.25842	2.18115	0.0659878	1.92668	0.468751	835.461	8.02398	827.195	12.3534	805.048	40.617	103.778	835.461	8.02398
U168		12762.6	104	11.3618	0.538719	0.161091	0.101842	0.998849	0.824346	2.06025	0.0587322	1.80193	0.484818	625.195	5.96088	610.47	9.46175	556.204	39.5656	112.404
U169		10656.5	91.484	13.8175	2.3035	0.0426376	0.0970631	0.986923	0.806201	2.17303	0.0602675	1.93598	0.45417	597.175	5.63797	600.321	9.857	612.219	42.0824	97.5426	597.175	5.63797
U170		5462.13	45.1642	5.06559	0.795149	0.119971	0.0980394	1.16751	0.81097	3.13132	0.0600203	2.90553	0.372849	602.909	6.72763	602.998	14.244	603.334	63.0397	99.9296	602.909	6.72763
U171		13448.4	107.383	12.4465	0.844625	0.16054	0.0997883	1.0793	0.85399	2.33682	0.0620965	2.07265	0.461864	613.168	6.32142	626.837	10.9378	676.473	44.5517	90.6419	613.168	6.32142
U172		9588.99	84.7599	10.3427	1.30916	0.0709568	0.0949483	1.02232	0.773543	2.52715	0.0591142	2.31113	0.404537	584.736	5.72334	581.794	11.1989	570.325	50.4954	102.527	584.736	5.72334
U173		573.781	3.91486	0.485643	0.0217535	0.608598	0.133211	2.73451	1.04554	10.2876	0.0569499	9.91755	0.265805	806.16	20.7263	726.671	53.3945	488.602	218.869	164.993
U174		171173	100.469	56.6779	0.522494	0.097747	0.489084	1.00101	12.3006	1.37614	0.182488	0.944313	0.727407	2566.71	21.2389	2627.61	13.0454	2674.87	17.0214	95.9565	2674.87	17.0214
U175		41607	51.6583	19.3632	0.881114	1.91302	0.29859	1.23805	4.72945	2.65353	0.114929	2.347	0.46657	1684.31	18.3732	1772.47	22.2735	1877.96	42.6955	89.6884	1877.96	42.6955
U176		5249.38	28.8257	3.91866	0.315486	0.366095	0.133476	1.22039	1.19428	3.48381	0.0649224	3.26306	0.350304	807.667	9.27432	797.941	19.2606	770.875	68.854	104.773	807.667	9.27432
Sample Dol 12 (Dolphin 1 borehole, Early Miocene)
U177		27716	219.573	26.4729	0.838907	0.0353994	0.104763	0.890191	0.879121	1.57142	0.0608881	1.29497	0.566487	642.264	5.45263	640.508	7.47748	634.317	28.2572	101.253	642.264	5.45263
U178		17509.1	67.7014	13.2256	0.686856	0.0741247	0.17523	0.980579	1.79076	1.77027	0.0741519	1.47388	0.553916	1040.86	9.44156	1042.1	11.5558	1044.7	30.1434	99.6331	1044.7	30.1434
U179		8608.67	61.364	8.07454	1.26768	0.193161	0.101662	1.03263	0.938727	3.65918	0.067	3.51045	0.282202	624.141	6.15196	672.215	17.996	836.836	73.2804	74.5834
U180		22062.8	133.304	19.7369	0.694485	0.0226286	0.134405	0.952858	1.19392	1.77263	0.0644544	1.49475	0.537539	812.948	7.29069	797.775	9.80996	755.626	31.895	107.586	812.948	7.29069
U181		5974.47	34.3245	6.95323	2.01794	0.954561	0.13539	1.22835	1.06046	6.06905	0.0568334	5.94344	0.202396	818.539	9.45255	734.051	31.7201	484.082	131.316	169.091
U182		86507.8	53.2961	31.6716	0.871319	0.0394511	0.483437	0.961082	11.3357	1.35992	0.170139	0.962137	0.706719	2542.22	20.2364	2551.15	12.8071	2558.26	17.4041	99.3731	2558.26	17.4041
U183		12744.2	55.3396	9.25069	0.597678	0.0868489	0.151718	1.11702	1.51976	2.24047	0.0726832	1.94215	0.498564	910.585	9.49817	938.382	13.7358	1004.22	39.7248	90.6759	1004.22	39.7248
U184		40699.2	216.451	31.5877	0.822184	0.702921	0.123868	0.887971	1.19299	2.05855	0.0698828	1.85718	0.431358	752.79	6.32186	797.346	11.3837	923.988	38.469	81.4718
U185		62418	341.662	49.429	0.558774	0.0843479	0.133452	0.827289	1.25198	1.4159	0.0680714	1.14908	0.584283	807.528	6.29394	824.296	8.01238	869.798	24.294	92.8409	807.528	6.29394
U186		76864.1	325.501	51.8029	0.166745	0.0105462	0.163345	0.853072	1.63777	1.24721	0.0727514	0.909841	0.683982	975.341	7.73912	984.856	7.89145	1006.12	19.1098	96.9406	1006.12	19.1098
U187		20980.9	158.363	19.0572	0.648311	0.0256142	0.10983	0.96785	0.932961	1.67623	0.0616361	1.36859	0.577396	671.763	6.18482	669.191	8.22755	660.541	29.6988	101.699	671.763	6.18482
U188		3487.29	27.6761	3.37558	0.801067	0.0825206	0.108108	1.25785	0.896119	3.39106	0.0601452	3.14915	0.370932	661.752	7.91881	649.651	16.2789	607.829	68.2474	108.871	661.752	7.91881
U189		16430.4	139.559	13.7805	0.250406	0.00531868	0.100255	0.947928	0.832381	1.82422	0.0602434	1.55859	0.519635	615.904	5.57784	614.933	8.42459	611.357	33.9936	100.744	615.904	5.57784
U195		89024	124.189	51.2085	1.2211	0.0378854	0.321564	0.854902	5.05842	1.30496	0.114141	0.985939	0.655115	1797.36	13.444	1829.16	11.133	1865.55	18.7183	96.345	1865.55	18.7183
U196		54583.2	58.0639	21.6734	0.622777	0.660218	0.318193	1.08722	6.14613	1.58337	0.140154	1.15109	0.686652	1780.9	16.9448	1996.82	13.894	2228.33	20.8775	79.9209
U197		117720	65.0526	38.7783	0.491798	0.0169656	0.521068	0.905511	13.399	1.3058	0.186582	0.940828	0.693455	2703.71	20.0489	2708.18	12.4747	2711.53	16.9373	99.7116	2711.53	16.9373
U198		159905	87.269	49.2743	0.380589	0.0305197	0.503306	0.915932	12.8669	1.23568	0.185496	0.82944	0.741238	2627.99	19.8181	2669.95	11.7828	2701.89	15.2778	97.2647	2701.89	15.2778
U199		25608.6	110.264	17.9799	0.374618	0.0462479	0.157698	0.919616	1.55954	1.70107	0.0717568	1.43106	0.540611	943.972	8.09102	954.283	10.5441	978.133	29.5712	96.5075	943.972	8.09102
U200		5768.89	31.2708	4.43233	0.276234	0.121906	0.141891	1.19358	1.28626	3.05904	0.065776	2.81657	0.390183	855.346	9.5719	839.637	17.4844	798.314	59.2226	107.144	855.346	9.5719
U201		508471	383.96	188.383	0.770289	b.d.	0.460697	0.986705	10.3749	1.21691	0.163405	0.712246	0.810825	2442.63	20.1039	2468.82	11.3944	2490.44	13.6585	98.0803	2490.44	13.6585
U202		512836	313.874	165.859	0.442058	0.017349	0.467564	0.904401	11.3465	1.15989	0.176083	0.72622	0.779732	2472.87	18.6218	2552.04	10.9616	2615.57	13.8063	94.5443	2615.57	13.8063
U203		16102.6	61.7399	11.0863	0.478845	0.0598273	0.16824	1.01318	1.71247	1.8749	0.0738562	1.57756	0.540394	1002.41	9.42125	1013.21	12.0387	1036.63	32.2452	96.6985	1036.63	32.2452
U204		21139.8	50.345	11.1977	0.9202	3.65568	0.173413	1.0867	2.05269	2.6632	0.0858883	2.4314	0.408044	1030.89	10.3676	1133.19	18.1997	1334.8	47.3133	77.2318
U205		6758.43	34.7395	5.33241	0.383143	0.10542	0.14959	1.29813	1.39573	2.61999	0.0677009	2.27579	0.495471	898.665	10.8998	887.13	15.5104	858.477	47.4874	104.681	898.665	10.8998
U206		17743.7	78.1946	12.8067	0.365671	0.0881523	0.159105	0.968265	1.54144	2.00169	0.0702969	1.75192	0.483723	951.802	8.58301	947.079	12.3443	936.116	36.2591	101.676	951.802	8.58301
U207		15006.4	75.3193	11.8567	0.551036	0.393844	0.145024	1.00645	1.39784	2.41973	0.0699374	2.20049	0.415936	873.011	8.23072	888.02	14.3357	925.592	45.4641	94.3192	873.011	8.23072
U208		505165	268.631	146.131	0.153076	0.113094	0.508793	0.874468	13.0653	1.11648	0.186325	0.69414	0.783238	2651.47	19.0625	2684.38	10.6876	2709.25	13.3107	97.8675	2709.25	13.3107
U209		136241	90.1327	50.4619	0.746931	0.0310753	0.467759	0.890251	10.615	1.24814	0.164661	0.874825	0.713259	2473.73	18.3372	2490.02	11.7054	2503.34	16.1074	98.8171	2503.34	16.1074
U210		183942	95.8959	68.4343	0.97252	5.63696	0.54257	1.98836	12.1796	3.0952	0.162882	2.37207	0.642399	2794.2	45.1089	2618.34	29.0981	2485.04	40.516	112.441
U211		436604	282.069	141.108	0.305129	0.00264145	0.458154	0.821547	10.9066	1.10939	0.172732	0.745528	0.740538	2431.4	16.691	2515.2	10.4593	2583.54	14.1042	94.1111	2583.54	14.1042
U212		9549.19	100.96	8.53329	0.317924	0.0671366	0.0843387	0.988783	0.663354	2.25431	0.0570706	2.02588	0.43862	521.968	4.96557	516.663	9.13534	493.27	44.8906	105.818	521.968	4.96557
U213		11706.6	62.7185	9.98318	0.778055	0.0612125	0.140244	0.979934	1.32065	2.43062	0.0683278	2.22433	0.403162	846.041	7.78282	854.796	14.0571	877.582	46.2886	96.4059	846.041	7.78282
U214		406005	159.269	111.905	0.738973	0.0432862	0.563275	0.994213	17.0614	1.25954	0.21978	0.7733	0.789343	2880.15	23.1445	2938.29	12.2452	2978.35	14.3445	96.7027	2978.35	14.3445
U215		364292	201.887	124.492	0.766981	0.143273	0.515573	1.51992	13.3141	1.73423	0.187376	0.835103	0.876424	2680.38	33.3621	2702.18	16.4816	2718.53	15.3514	98.5967	2718.53	15.3514
U216		8264.86	36.9295	5.56211	1.71415	6.15966	0.10047	1.52678	0.883174	7.59376	0.0637831	7.43869	0.201058	617.161	8.99177	642.696	36.1638	733.492	157.613	84.1401
U217		25223.6	101.616	18.1884	0.494042	0.0442714	0.167672	0.946641	1.71725	1.80077	0.0743134	1.53188	0.525685	999.27	8.77908	1015	11.5762	1049.08	31.2785	95.2516	1049.08	31.2785
U218		3489.9	20.7539	2.92491	0.675336	0.984966	0.124778	1.57939	1.02869	4.81191	0.0598192	4.54533	0.328225	758.008	11.3021	718.274	24.78	596.066	98.5821	127.169
U219		3979.76	31.5232	3.89179	0.901056	0.140207	0.106005	1.26484	0.887167	3.32753	0.0607258	3.07776	0.380115	649.505	7.82263	644.846	15.8896	628.566	66.4791	103.331	649.505	7.82263
U220		28226.9	171.573	20.0229	0.337976	1.09076	0.112018	0.961738	0.996865	1.90669	0.064572	1.64637	0.504402	684.455	6.25598	702.217	9.67669	759.472	35.0415	90.1225	684.455	6.25598
U221		45809.1	59.3579	24.3967	0.765263	0.106578	0.35444	1.02485	5.61165	1.50707	0.114879	1.10496	0.680028	1955.76	17.3202	1917.89	13.0533	1877.18	20.7479	104.186	1877.18	20.7479
U222		13386.3	124.675	14.2544	1.11872	0.0421387	0.0935344	0.984979	0.77102	1.97561	0.059812	1.71256	0.49857	576.406	5.4398	580.348	8.74211	595.805	37.3871	96.7442	576.406	5.4398
U223		16876.2	85.59	12.4879	0.427645	0.0174346	0.139671	1.24961	1.32429	2.19816	0.0687972	1.80842	0.56848	842.8	9.8826	856.388	12.7302	891.738	37.6574	94.5121	842.8	9.8826
U224		8039.47	46.8978	6.56623	0.537581	0.121467	0.130297	1.05978	1.17798	2.67275	0.0655994	2.45367	0.396512	789.559	7.88676	790.374	14.6881	792.675	51.6907	99.607	789.559	7.88676
U225		362569	431.646	90.4796	0.663867	23.4386	0.124086	1.85195	1.82071	4.60014	0.106466	4.21089	0.402585	754.038	13.1848	1052.94	30.1582	1738.95	77.3996	43.3617
U226		149182	190.073	76.3034	0.839511	0.0519245	0.337017	0.857742	5.41886	1.25838	0.116668	0.920766	0.681621	1872.3	13.9736	1887.84	10.8629	1904.98	17.5443	98.2848	1904.98	17.5443
U227		6585.32	40.0138	6.25173	0.973851	0.101643	0.132432	1.20626	1.19498	2.68529	0.0654731	2.39911	0.449211	801.722	9.10379	798.266	14.8539	788.631	50.5833	101.66	801.722	9.10379
U228		4289	24.9492	3.592	0.657408	0.216016	0.130068	1.33066	1.17517	3.80111	0.0655575	3.56059	0.350072	788.255	9.88208	789.06	20.8589	791.336	74.8591	99.6106	788.255	9.88208
U229		5693.15	61.7897	5.47863	0.46473	0.164872	0.085103	1.36558	0.660384	3.65818	0.0563048	3.39374	0.373294	526.51	6.90986	514.849	14.7776	463.413	75.3396	113.616
U230		4409.03	39.2017	5.21137	1.57284	0.0189185	0.100253	1.31131	0.839007	2.85847	0.0607243	2.53995	0.458745	615.891	7.70948	618.597	13.2485	628.513	54.9249	97.9917	615.891	7.70948
U231		17998.4	139.984	13.8677	0.0550833	0.0264153	0.106011	0.975322	0.907522	1.78719	0.0621155	1.4976	0.545729	649.541	6.03641	655.74	8.64504	677.125	32.348	95.9263	649.541	6.03641
U232		17661.1	148.659	15.2775	0.288142	0.0110494	0.103489	0.988511	0.854006	1.85999	0.059877	1.57557	0.531461	634.824	5.98586	626.845	8.70985	598.158	34.4303	106.13	634.824	5.98586
U233		128764	133.007	52.4722	0.415697	0.0199219	0.361405	0.89851	6.53865	1.266	0.131277	0.891875	0.709722	1988.83	15.4129	2051.12	11.2365	2114.32	16.7799	94.0647	2114.32	16.7799
U234		10046.6	87.5186	9.73646	0.664065	0.0371918	0.101694	1.03373	0.839769	2.15219	0.0599183	1.88767	0.480315	624.328	6.16024	619.018	9.98373	599.65	41.1293	104.115	624.328	6.16024
U235		6328.41	61.2548	6.42859	0.821182	0.047099	0.0921483	1.10674	0.743935	2.63258	0.0585789	2.38863	0.420403	568.23	6.02732	564.699	11.4094	550.5	52.3477	103.221	568.23	6.02732
U236		71288.6	71.0408	31.2781	0.618238	0.0801981	0.384788	0.928355	7.00273	1.3346	0.132051	0.958808	0.695606	2098.61	16.667	2111.78	11.9446	2124.62	17.8645	98.7757	2124.62	17.8645
U237		69539.4	92.1818	36.9692	0.795728	0.008653	0.344923	0.943027	5.48402	1.30783	0.115364	0.906149	0.721065	1910.31	15.6242	1898.1	11.3053	1884.77	17.3265	101.355	1884.77	17.3265
U238		794325	451.853	124.808	0.634174	63.6801	0.0729988	6.24684	0.572074	15.0232	0.0568631	13.6629	0.415813	454.197	27.3976	459.355	55.5109	485.236	301.667	93.6033	454.197	27.3976
U239		83243.7	504.4	58.9112	0.38443	b.d.	0.11646	1.13927	1.1545	2.15749	0.07193	1.83216	0.528054	710.156	7.67029	779.365	11.7508	983.044	37.6277	72.2405
U240		3166.79	27.2595	3.54855	1.46368	0.172386	0.0991729	1.34201	0.825115	3.9495	0.0603692	3.7145	0.339793	609.56	7.81233	610.898	18.1347	615.863	80.3409	98.9765	609.56	7.81233
U241		5277.72	53.759	5.32666	0.794929	0.0444964	0.0876204	1.19144	0.70398	2.69635	0.0582974	2.41884	0.441872	541.449	6.19434	541.165	11.317	539.973	53.0981	100.273	541.449	6.19434
U242		142212	86.2041	46.7482	0.354621	0.0222471	0.49047	0.893535	12.0161	1.20204	0.177765	0.804043	0.743351	2572.71	19.0047	2605.67	11.406	2631.38	14.9438	97.7703	2631.38	14.9438
U243		11418	81.9074	10.7178	1.63277	0.979227	0.0930043	1.14142	0.899757	3.18248	0.0701967	2.97074	0.358658	573.28	6.26853	651.598	15.311	933.189	61.1481	61.4324
U244		26296.8	117.476	22.4167	0.785465	0.017356	0.169424	1.00928	1.66945	1.5851	0.071498	1.22225	0.63673	1008.94	9.44154	996.978	10.0883	970.768	25.4116	103.932	1008.94	9.44154
U245		7596.59	68.9793	6.72002	0.365084	0.0868312	0.0952901	1.18706	0.760906	2.64443	0.0579399	2.36302	0.448892	586.748	6.66488	574.533	11.6092	526.502	51.9992	111.443
U246		6626.48	39.748	5.85215	0.781637	0.108324	0.128935	1.16319	1.13977	2.75481	0.0641415	2.4972	0.422238	781.789	8.57408	772.4	14.9088	745.348	52.9959	104.889	781.789	8.57408
U247		55603.9	221.402	42.6591	0.593995	0.0850854	0.176832	0.84513	1.82415	1.29249	0.0748507	0.977894	0.653879	1049.64	8.20553	1054.18	8.507	1063.59	20.2933	98.6887	1063.59	20.2933
U248		210208	203.89	99.0424	1.1733	3.06633	0.362291	0.959908	6.03638	1.77197	0.120896	1.48945	0.541718	1993.03	16.4909	1981.11	15.4939	1968.69	27.207	101.236	1968.69	27.207
U249		12793.7	67.8662	9.16278	0.311262	0.0348774	0.132957	1.04044	1.25932	2.02539	0.0687256	1.73772	0.513699	804.711	7.88279	827.6	11.4767	889.587	36.2218	90.4589	804.711	7.88279
U255		74105.7	98.3382	39.2564	0.710711	0.0379837	0.348793	0.946859	5.53348	1.38209	0.115113	1.00679	0.685093	1928.83	15.818	1905.81	11.956	1880.85	19.0497	102.551	1880.85	19.0497
U256		3789.43	17.0025	2.87039	0.456153	0.359015	0.159578	1.49732	1.52459	3.7644	0.0693225	3.45381	0.397756	954.432	13.2931	940.325	23.0916	907.424	71.3146	105.18	954.432	13.2931
U257		11428.5	116.256	14.0179	1.61242	0.0163666	0.0891541	1.05778	0.716507	2.42989	0.0583141	2.18757	0.435322	550.532	5.58947	548.603	10.3057	540.599	48.0554	101.838	550.532	5.58947
U258		36848.2	166.324	27.3122	0.423256	0.0252926	0.157059	0.899703	1.57405	1.45625	0.072719	1.14508	0.617821	940.413	7.88879	960.023	9.0656	1005.22	23.7554	93.553	1005.22	23.7554
U259		23884.7	141.308	20.2425	0.558124	0.0524624	0.133323	0.916289	1.21337	1.75536	0.0660362	1.49724	0.521994	806.793	6.96206	806.737	9.78632	806.581	31.6985	100.026	806.793	6.96206
U260		21124.7	202.338	19.5088	0.559743	0.0638239	0.0895879	0.984339	0.729765	1.77154	0.0591055	1.4729	0.555641	553.099	5.22574	556.415	7.59829	570.005	32.3748	97.0342	553.099	5.22574
U261		19674	113.957	16.486	0.407606	0.0241059	0.14076	0.931767	1.28366	1.68592	0.0661705	1.40503	0.552677	848.957	7.42546	838.481	9.63929	810.833	29.7728	104.702	848.957	7.42546
U262		35220.2	157.025	21.6773	0.48935	3.16843	0.121127	1.17513	1.00432	3.24703	0.0601622	3.02692	0.36191	737.047	8.19398	705.999	16.5274	608.439	65.6043	121.137
U263		23439.7	158.197	15.3874	0.0241943	1.73748	0.101336	0.941002	0.820492	2.14343	0.0587498	1.92583	0.439017	622.232	5.59143	608.323	9.81772	556.854	42.2466	111.741
U264		45315.3	286.876	39.3545	0.631499	0.00988133	0.125322	0.939128	1.12509	1.45064	0.0651411	1.10562	0.647388	761.122	6.75435	765.41	7.81564	777.95	23.7262	97.8369	761.122	6.75435
U265		23095.8	192.599	20.0222	0.305279	0.0321373	0.103822	0.955838	0.864723	1.70337	0.0604338	1.40991	0.561146	636.77	5.80554	632.698	8.03202	618.173	30.7797	103.008	636.77	5.80554
U266		20311.6	113.484	15.3512	0.117964	0.0475345	0.141578	0.953067	1.30354	1.63447	0.066807	1.32784	0.583103	853.579	7.63326	847.282	9.40918	830.824	28.0962	102.739	853.579	7.63326
U267		45930.5	180.365	32.9848	0.579016	0.122907	0.165576	0.923635	1.67593	1.53171	0.0734434	1.2219	0.603008	987.687	8.47462	999.437	9.76433	1025.3	25.2119	96.3311	1025.3	25.2119
U268		62280.3	67.4583	29.485	0.593751	0.0269751	0.388811	0.895764	6.89155	1.40948	0.128609	1.08823	0.635527	2117.31	16.2058	2097.57	12.5792	2078.26	20.0892	101.879	2078.26	20.0892
U269		16346.5	65.0594	8.13497	0.841676	7.83898	0.0936256	1.16697	0.839943	5.3793	0.0650952	5.25119	0.216938	576.944	6.44768	619.114	24.9381	776.47	110.545	74.3034
U270		20945.1	152.198	18.2627	0.437503	0.0423989	0.115502	0.981715	1.00079	1.78908	0.0628705	1.49568	0.548726	704.624	6.56359	704.212	9.09922	702.896	32.1769	100.246	704.624	6.56359
U271		6123.61	37.2613	5.80835	1.09043	0.0819251	0.126958	1.25287	1.17252	2.68036	0.0670123	2.36953	0.467424	770.488	9.10795	787.824	14.6984	837.218	49.5869	92.0296	770.488	9.10795
U272		25997.5	88.0261	12.911	0.934817	7.4502	0.107597	1.05585	1.00822	4.06607	0.0679905	3.92659	0.259673	658.776	6.62145	707.973	20.7331	867.333	81.541	75.9543
U273		25278.8	120.389	20.2182	0.464733	0.0132184	0.160356	0.959363	1.55673	1.55787	0.0704405	1.22743	0.615816	958.753	8.562	953.169	9.6532	940.299	25.6259	101.963	958.753	8.562
U274		147185	95.3842	61.3049	1.53645	0.0815543	0.454875	0.941436	10.9187	1.30198	0.174171	0.899364	0.723079	2416.89	19.0187	2516.23	12.2312	2597.38	16.4036	93.051	2597.38	16.4036
U275		42866.2	165.67	32.1274	0.762506	0.218726	0.169491	1.24027	1.81468	1.89368	0.0776869	1.431	0.65495	1009.31	11.5999	1050.77	12.4173	1137.98	28.9134	88.6926
U276		10555.6	107.443	9.23688	0.206006	0.30028	0.0879121	1.0278	0.707683	2.27067	0.0584097	2.02474	0.45264	543.177	5.3619	543.37	9.56181	544.179	44.4852	99.8159	543.177	5.3619
U277		13170.3	62.0445	9.1734	0.156709	0.323732	0.151335	0.986669	1.47675	2.39789	0.0708049	2.18549	0.411473	908.44	8.37449	920.899	14.5307	950.865	44.986	95.5383	908.44	8.37449
U278		14208.6	125.867	11.2571	0.0197735	0.0724026	0.0968064	1.067	0.7881	1.97295	0.0590706	1.65953	0.540815	595.666	6.07932	590.093	8.83861	568.72	36.4076	104.738	595.666	6.07932
U279		8226.17	49.7268	6.72226	0.306071	0.0506834	0.134578	1.15803	1.20906	2.20233	0.0651881	1.87329	0.525823	813.929	8.86551	804.76	12.2514	779.468	39.6646	104.421	813.929	8.86551
U280		4634.39	38.7156	4.1371	0.378692	0.016196	0.105317	1.26517	0.895401	3.4524	0.0616901	3.21223	0.36646	645.491	7.77865	649.267	16.5661	662.418	68.9849	97.4446	645.491	7.77865
U281		16384.8	90.619	15.7247	1.10162	0.0567166	0.142204	1.01467	1.34163	2.08597	0.0684565	1.82256	0.486425	857.116	8.15642	863.938	12.1496	881.477	38.006	97.2363	857.116	8.15642
U282		21869.1	42.9187	7.13848	1.45916	20.0222	0.0883867	1.93649	0.845319	9.70479	0.0693949	9.50963	0.19954	545.989	10.1419	622.077	45.1424	909.576	195.895	60.0267
U283		2278.52	18.974	2.81286	2.53365	0.69475	0.0897887	1.66516	0.780446	6.99486	0.0630689	6.79377	0.238055	554.287	8.84907	585.738	31.1357	709.598	144.522	78.1128
U284		48871.7	67.9658	26.078	0.653748	0.0606745	0.33965	1.15219	5.37068	1.66089	0.114734	1.19625	0.693716	1884.98	18.8583	1880.19	14.2746	1874.9	22.3371	100.538	1874.9	22.3371
U285		140940	261.384	78.1375	0.22288	0.00688092	0.297887	0.928256	4.11375	1.26921	0.100203	0.865579	0.731367	1680.82	13.7635	1657.04	10.4282	1627.01	17.025	103.307	1627.01	17.025
U286		4268.02	34.3275	3.4414	0.0461981	0.0567316	0.107659	1.31658	0.906948	3.03264	0.0611262	2.73194	0.434137	659.135	8.25667	655.434	14.6519	642.712	58.9109	102.555	659.135	8.25667
U287		24103.3	107.114	15.6892	0.11585	0.846996	0.150026	1.06231	1.43137	1.99442	0.0692276	1.68796	0.53264	901.112	8.94663	902.124	11.9377	904.604	35.1241	99.6139	901.112	8.94663
U288		16186.9	64.956	12.7298	0.688678	0.0784558	0.17499	1.09047	1.78597	1.90816	0.0740552	1.56588	0.571473	1039.54	10.4838	1040.36	12.4407	1042.06	31.9873	99.7582	1042.06	31.9873
U289		27059	229.473	24.8363	0.475125	0.0277902	0.103387	0.901211	0.868326	1.5462	0.0609415	1.2564	0.582856	634.225	5.4541	634.658	7.30943	636.2	27.4304	99.6895	634.225	5.4541
U290		18355.2	117.066	12.9744	0.531294	0.0501207	0.102774	1.23178	1.12329	2.27859	0.0793053	1.91695	0.540587	630.646	7.40796	764.55	12.251	1178.88	38.2478	53.4956
U291		17611.5	111.889	10.5998	0.466405	3.27369	0.0832807	1.28402	0.731753	3.29247	0.063755	3.03178	0.389987	515.675	6.36945	557.582	14.1315	732.561	64.3912	70.3934
U292		16033.8	137.385	13.9983	0.22387	0.0511189	0.104084	1.00553	0.867226	1.9654	0.0604567	1.68869	0.511619	638.296	6.12029	634.06	9.27865	618.988	36.7358	103.119	638.296	6.12029
U293		41805.2	177.201	33.3885	0.628325	0.0129619	0.171595	0.86412	1.74034	1.38053	0.0735907	1.07665	0.625932	1020.89	8.17692	1023.59	8.92955	1029.36	22.326	99.1777	1029.36	22.326
U294		25548.2	109.226	19.3425	0.467228	0.0197801	0.167748	0.958869	1.71383	1.73417	0.0741318	1.44496	0.552927	999.693	8.89556	1013.72	11.1414	1044.15	29.5706	95.7423	1044.15	29.5706
U295		16542	39.0583	6.57667	0.739631	9.75447	0.122267	1.64919	1.37586	6.31753	0.0816506	6.09847	0.261049	743.598	11.5893	878.671	37.1524	1236.27	119.707	60.1486
U296		15705.3	99.876	13.9496	0.527914	0.0374835	0.131733	1.02389	1.17989	1.98835	0.0649893	1.70445	0.514948	797.744	7.69472	791.263	10.9409	773.043	36.1793	103.195	797.744	7.69472
U297		14220.2	117.876	12.4244	0.200512	0.0386267	0.108559	0.95401	0.903289	2.02113	0.0603744	1.78181	0.472018	664.377	6.03302	653.484	9.74985	616.05	38.7488	107.845	664.377	6.03302
U298		130443	172.802	26.1033	0.428943	18.2534	0.074953	2.3858	0.937215	4.80013	0.0907286	4.16524	0.497028	465.927	10.7268	671.423	23.5845	1440.06	79.5716	32.3548
U299		134991	102.176	49.2028	0.842329	0.00553699	0.393265	0.999034	9.10361	1.31358	0.167966	0.852888	0.760544	2137.95	18.2141	2348.47	12.1234	2536.72	15.7443	84.2801
U305		178159	111.645	63.1566	0.53415	0.0101152	0.493054	0.906527	11.9456	1.2385	0.175796	0.84386	0.731953	2583.88	19.3477	2600.15	11.7381	2612.85	15.5512	98.891	2612.85	15.5512
U306		200561	117.009	76.0828	0.931715	0.0109334	0.5224	0.915138	13.0125	1.23574	0.180739	0.8304	0.740561	2709.35	20.295	2680.56	11.7937	2658.92	15.3188	101.897	2658.92	15.3188
U307		13773.3	60.4586	11.9959	0.940462	0.0430098	0.168383	0.975435	1.68359	2.14117	0.072549	1.90608	0.455561	1003.19	9.07799	1002.34	13.6566	1000.47	39.02	100.272	1000.47	39.02
U308		267098	179.48	77.3358	0.346805	0.385919	0.379651	1.23691	9.18276	1.48758	0.175502	0.826418	0.831487	2074.65	21.9697	2356.4	13.7152	2610.07	15.2912	79.4865
U309		124104	176.637	60.2706	0.223527	0.0050933	0.334393	0.896791	5.26665	1.24596	0.11428	0.864977	0.719758	1859.64	14.5213	1863.47	10.7077	1867.75	16.6535	99.5654	1867.75	16.6535
U310		89797.9	110.968	53.9909	1.53573	0.0233894	0.356513	0.926441	6.01903	1.40403	0.122503	1.05499	0.659846	1965.62	15.7311	1978.6	12.299	1992.19	19.6777	98.6662	1992.19	19.6777
U311		49957.1	201.555	31.706	0.45061	1.13096	0.143226	1.02557	1.40295	1.87332	0.0710747	1.56766	0.547458	862.878	8.29553	890.183	11.122	958.643	32.4111	90.0103	862.878	8.29553
Sample Dol 16 (Dolphin 1 borehole, Early Miocene)
U312		3826.57	38.7292	3.97514	0.903233	0.090878	0.0883059	1.33733	0.727108	3.433	0.0597452	3.1618	0.389552	545.51	7.00122	554.854	14.68	593.385	68.6851	91.9319	545.51	7.00122
U313		8612.06	41.8786	7.16739	0.45192	0.111611	0.163727	1.08575	1.56309	2.28122	0.0692719	2.00627	0.475953	977.454	9.8612	955.69	14.1409	905.92	41.6229	107.896	977.454	9.8612
U314		5748.58	23.4936	4.35387	0.582269	0.187731	0.169429	1.36121	1.68279	2.96675	0.0720672	2.63605	0.458821	1008.96	12.7247	1002.04	18.9076	986.923	53.8662	102.233
U315		47451	63.7024	26.8481	0.767853	0.0375735	0.365429	1.04425	5.86638	1.61043	0.116483	1.22599	0.648427	2007.85	18.0479	1956.27	14.0338	1902.13	22.7932	105.558	1902.13	22.7932
U316		13642.5	84.268	12.7652	0.745872	0.01783	0.135347	0.985269	1.2338	2.04216	0.066144	1.78876	0.482465	818.298	7.58435	816.069	11.4665	809.996	37.7222	101.025	818.298	7.58435
U317		8492.78	79.8491	7.65729	0.123773	0.388303	0.100469	1.25848	0.777689	3.2394	0.0561652	2.98496	0.38849	617.158	7.41394	584.164	14.395	457.906	66.3617	134.778
U318		10214.9	59.9271	9.17804	0.695342	0.0458006	0.137989	1.07712	1.27196	2.24371	0.0668841	1.96826	0.480061	833.283	8.43133	833.268	12.7672	833.228	41.3011	100.007	833.283	8.43133
U319		2881.62	19.5216	2.46296	0.395029	0.341628	0.122193	1.64914	1.0529	4.89678	0.0625218	4.61073	0.336781	743.176	11.5828	730.315	25.506	691.046	98.4402	107.544	743.176	11.5828
U320		11023.3	87.8301	11.1994	0.852581	0.0644906	0.110919	0.996683	0.948645	2.03401	0.0620573	1.77308	0.490009	678.082	6.42527	677.397	10.0649	675.122	38.1968	100.438	678.082	6.42527
U321		10756.7	93.9736	10.1275	0.550668	0.0453284	0.100797	1.01977	0.844366	2.30363	0.0607821	2.06562	0.442679	619.08	6.0286	621.552	10.7168	630.563	44.7335	98.1789	619.08	6.0286
U322		9812.72	47.9597	8.5569	0.740704	0.0480816	0.159655	1.12174	1.5528	2.22967	0.0705714	1.92694	0.503099	954.858	9.96865	951.609	13.7863	944.102	39.7713	101.139	954.858	9.96865
U323		10904.4	53.5896	9.30407	0.809838	0.0741893	0.151151	1.1473	1.51427	2.09473	0.0726918	1.7526	0.547707	907.412	9.72333	936.164	12.8258	1004.46	35.9095	90.3384	1004.46	35.9095
U324		16998.6	144.873	16.9659	0.701512	0.0339905	0.105707	0.933533	0.890301	1.79675	0.0611122	1.5352	0.519567	647.767	5.76365	646.531	8.60383	642.219	33.3277	100.864	647.767	5.76365
U325		166407	124.858	55.7506	0.641353	1.42023	0.360601	0.971909	7.86507	1.50259	0.15826	1.14594	0.646822	1985.02	16.639	2215.69	13.6196	2436.39	20.4593	81.474
U326		38263.7	212.503	31.0162	0.598396	0.12134	0.131808	0.943099	1.24841	1.63698	0.0687244	1.33801	0.576122	798.169	7.09303	822.687	9.24593	889.551	28.0603	89.7272	798.169	7.09303
U327		6971.2	32.0767	5.93781	0.661138	0.0618629	0.168425	1.15688	1.68382	2.42452	0.0725409	2.13071	0.477158	1003.43	10.7635	1002.43	15.4604	1000.24	43.5502	100.319	1000.24	43.5502
U328		8723.32	63.0931	7.38333	0.338476	0.0780296	0.115453	1.04818	1.00841	2.32094	0.0633762	2.07077	0.451618	704.34	7.00386	708.072	11.8423	719.923	44.2031	97.8355	704.34	7.00386
U329		52902.4	260.131	43.5264	0.477152	0.0131501	0.158919	0.891566	1.54838	1.3861	0.0706959	1.06132	0.643217	950.768	7.89765	949.847	8.57579	947.714	22.2702	100.322	950.768	7.89765
U330		13720	95.4488	12.1663	0.422012	0.025889	0.123476	0.997254	1.07235	1.97293	0.063016	1.70233	0.505469	750.537	7.07688	739.894	10.3783	707.814	36.506	106.036	750.537	7.07688
U331		19496.4	61.3479	10.7177	0.371839	3.23952	0.157016	1.06967	1.57465	2.70159	0.0727673	2.4808	0.395943	940.17	9.3713	960.263	16.7897	1006.57	50.5726	93.4035	1006.57	50.5726
U332		13648.4	125.605	14.2948	0.86242	0.0232641	0.0992555	0.955336	0.828245	1.90516	0.0605478	1.64833	0.501446	610.045	5.57028	612.638	8.77357	622.237	35.8529	98.0406	610.045	5.57028
U333		16499.9	72.8742	12.3247	0.357449	0.0424672	0.164584	1.01995	1.64825	2.00771	0.0726657	1.72934	0.508014	982.199	9.3069	988.879	12.7059	1003.73	35.4457	97.8547	1003.73	35.4457
U334		25839.3	211.257	22.3879	0.455273	0.43567	0.100058	0.916715	0.842021	1.88131	0.0610611	1.64285	0.487276	614.749	5.38519	620.26	8.74226	640.42	35.6314	95.9917	614.749	5.38519
U335		11624.6	65.521	9.60681	0.282502	0.0880973	0.14679	1.04933	1.33653	2.04728	0.0660655	1.75791	0.512548	882.947	8.67139	861.722	11.9053	807.511	37.0964	109.342	882.947	8.67139
U336		22481.8	141.38	19.131	0.857874	0.0135899	0.11615	0.990241	1.15502	1.84234	0.0721544	1.55359	0.537491	708.367	6.65368	779.61	10.0402	989.383	31.9835	71.5968
U337		58060.8	221.063	32.3559	0.573719	3.92272	0.122357	1.07009	1.1604	2.79527	0.0688134	2.58234	0.38282	744.117	7.53084	782.144	15.2543	892.224	53.5424	83.4003
U338		40429.5	149.574	26.2269	0.629317	1.88368	0.150935	0.957874	1.50577	2.33947	0.0723873	2.13438	0.409441	906.204	8.11229	932.728	14.2887	995.936	43.6521	90.9902	906.204	8.11229
U339		47576.8	141.531	34.676	0.789788	0.771728	0.208997	1.02789	2.28553	2.49419	0.0793487	2.27254	0.412112	1223.47	11.4733	1207.83	17.6365	1179.96	45.2193	103.688	1179.96	45.2193
U340		6132.2	41.857	6.73364	1.23895	0.038483	0.129648	1.21356	1.15053	3.02658	0.0643914	2.77262	0.400967	785.857	8.98827	777.495	16.4497	753.563	58.7201	104.285	785.857	8.98827
U341		36608.7	284.647	32.3781	0.288111	0.00620827	0.114225	0.919959	0.981584	1.51413	0.0623535	1.2026	0.607584	697.237	6.09102	694.417	7.63028	685.295	26.0911	101.743	697.237	6.09102
U342		15928	97.7516	14.6445	0.631172	0.0596745	0.137305	0.976653	1.23907	1.88706	0.0654791	1.61466	0.517553	829.407	7.61391	818.461	10.618	788.824	34.2235	105.145	829.407	7.61391
U343		39103.4	368.374	43.3296	1.02133	0.0109619	0.0985517	0.933447	0.811513	1.48966	0.0597483	1.16093	0.626619	605.916	5.40795	603.302	6.78835	593.495	25.5773	102.093	605.916	5.40795
U344		12763.3	77.7141	10.4837	0.273759	0.0285388	0.135218	0.980646	1.24126	2.09403	0.0666076	1.85021	0.468307	817.564	7.54253	819.454	11.7888	824.588	38.9101	99.1482	817.564	7.54253
U345		26360.6	158.952	25.5977	0.847141	0.00604536	0.140699	0.935108	1.29388	1.58622	0.0667265	1.28128	0.589519	848.613	7.44916	843.017	9.10291	828.309	27.1501	102.451	848.613	7.44916
U346		41945	43.5985	19.1212	0.410751	0.0124841	0.405879	1.04605	7.48401	1.5369	0.133792	1.12598	0.680626	2196.05	19.5034	2171.07	13.845	2147.55	20.6005	102.259	2147.55	20.6005
U347		107201	91.2189	23.5785	0.843593	34.5179	0.114344	2.5129	1.10928	8.33959	0.0703922	7.95198	0.301322	697.926	16.6263	757.83	44.536	938.894	163.087	74.3349
U348		29633.8	103.649	17.0734	0.588106	4.28322	0.140127	0.993059	1.46889	4.24834	0.0760608	4.13064	0.233752	845.38	7.88094	917.671	25.6723	1095.77	82.8378	77.1493
U349		17811.4	85.3229	16.2471	0.983327	0.0189101	0.160192	1.0272	1.57875	1.97425	0.0715101	1.68598	0.5203	957.841	9.15727	961.877	12.29	971.114	34.7396	98.6332	957.841	9.15727
U350		25926.6	122.523	22.1895	0.71	0.0539399	0.161719	0.889349	1.60695	1.65362	0.0720999	1.39409	0.537821	966.322	7.99759	972.919	10.371	987.848	28.7885	97.8209	966.322	7.99759
U351		60993.1	272.049	48.7584	0.504361	0.0229088	0.168021	0.915449	1.70079	1.38513	0.0734483	1.03949	0.660912	1001.2	8.50603	1008.83	8.88339	1025.44	21.6055	97.6359	1025.44	21.6055
U352		71181.3	433.235	64.8918	0.694334	0.00681703	0.134285	0.916551	1.23745	1.30522	0.0668643	0.929258	0.702222	812.265	7.00837	817.726	7.35077	832.612	19.9523	97.5562	812.265	7.00837
U353		25128.4	111.879	23.1156	0.995416	0.0397859	0.17306	1.05932	1.7321	1.70045	0.0726224	1.33018	0.622962	1028.95	10.0895	1020.53	10.9684	1002.52	27.4511	102.636	1002.52	27.4511
U354		9469.84	95.2818	10.805	1.19116	0.0369074	0.0915855	0.994585	0.745903	2.24614	0.0590949	2.01394	0.442798	564.907	5.38782	565.844	9.7514	569.614	44.0643	99.1736	564.907	5.38782
U355		16912.9	83.6753	18.112	1.33627	0.0263793	0.173271	0.956844	1.69582	1.93432	0.0710149	1.68109	0.494666	1030.11	9.12599	1006.96	12.3741	956.923	34.7132	107.648
U356		19324.3	204.076	20.1668	0.668771	0.0213189	0.0898471	1.03533	0.727538	1.71023	0.0587551	1.36124	0.605374	554.633	5.51017	555.107	7.32301	557.052	30.034	99.5658	554.633	5.51017
U357		393001	245.368	128.973	0.191685	0.327751	0.487697	0.84608	12.045	1.15399	0.179205	0.784755	0.733178	2560.7	17.9323	2607.91	10.9636	2644.78	14.6505	96.821	2644.78	14.6505
U358		20215	227.659	21.5976	0.704174	0.0883357	0.0855625	0.882364	0.676033	1.63689	0.0573295	1.37871	0.539049	529.24	4.4922	524.374	6.71349	503.241	30.6781	105.166	529.24	4.4922
U359		114658	171.054	51.3552	0.88748	b.d.	0.246019	0.88858	4.98883	1.28653	0.147138	0.930367	0.69068	1417.91	11.3353	1817.43	10.9519	2312.15	17.168	61.3243
U365		162525	121.788	76.4142	1.30357	0.0316552	0.475184	0.87598	10.5381	1.21838	0.160914	0.846823	0.718971	2506.26	18.2392	2483.27	11.4245	2464.53	15.7092	101.693	2464.53	15.7092
U366		12197.5	58.3029	10.259	0.691618	0.0263399	0.158055	1.23826	1.55267	2.2798	0.0712794	1.91421	0.543144	945.961	10.9063	951.556	14.0952	964.519	39.3925	98.0759	945.961	10.9063
U367		27075.7	241.718	23.9549	0.136229	0.00322841	0.1039	0.912654	0.869515	1.57091	0.0607232	1.2786	0.580971	637.226	5.54795	635.304	7.4313	628.473	27.9354	101.393	637.226	5.54795
U368		97520.2	67.1716	37.3191	0.481716	0.0891073	0.491801	0.976796	11.3093	1.35961	0.166856	0.94573	0.718439	2578.46	20.8045	2548.97	12.8016	2525.59	17.1823	102.093	2525.59	17.1823
U369		17147.7	106.508	15.3137	0.502233	0.0272103	0.136399	0.989399	1.27334	2.0914	0.0677372	1.84256	0.47308	824.268	7.66813	833.884	11.908	859.591	38.5445	95.8907	824.268	7.66813
U370		7538.43	79.7609	10.0054	1.7515	0.0773806	0.0895684	1.15043	0.711388	2.61025	0.0576296	2.34305	0.440735	552.984	6.10364	545.57	11.0234	514.721	51.6652	107.434	552.984	6.10364
U371		14112.9	130.163	13.4231	0.434375	0.0703177	0.0993543	1.02871	0.828396	2.00458	0.0604986	1.72049	0.513181	610.624	6.00212	612.722	9.23131	620.483	37.4077	98.4111	610.624	6.00212
U372		6066.77	53.4886	5.82709	0.451324	0.0422887	0.10498	1.139	0.879234	2.9651	0.0607703	2.73761	0.384137	643.528	6.98432	640.569	14.0929	630.146	59.1541	102.124	643.528	6.98432
U373		81324.7	103.115	44.6851	0.913344	0.0108285	0.359128	0.931564	6.01678	1.3629	0.121565	0.994825	0.683517	1978.04	15.9032	1978.28	11.9424	1978.52	18.6828	99.9756	1978.52	18.6828
U374		10009.4	81.5977	10.3039	0.780487	0.026618	0.112067	1.05395	0.960582	2.3588	0.0621944	2.11024	0.446816	684.741	6.85654	683.598	11.7438	679.839	45.3264	100.721	684.741	6.85654
U375		22485.4	110.319	19.743	0.744541	0.0218916	0.158626	0.994692	1.57109	1.84675	0.0718654	1.55597	0.538619	949.136	8.79353	958.855	11.4768	981.214	32.0694	96.7308	949.136	8.79353
U376		57317.6	231.735	41.5501	0.174054	0.00894884	0.183497	1.0002	1.92666	1.50393	0.0761849	1.12312	0.665057	1086.05	10.0138	1090.38	10.0801	1099.03	23.0264	98.8188	1099.03	23.0264
U377		6380.51	56.714	6.12254	0.395929	0.159266	0.105205	1.13156	0.851999	3.19619	0.0587618	2.98919	0.354033	644.843	6.95224	625.746	14.9361	557.3	65.3448	115.708
U378		11890.5	82.5032	10.6366	0.392374	0.0247288	0.125852	1.11583	1.12672	2.2036	0.0649606	1.9002	0.506367	764.156	8.05108	766.187	11.8655	772.113	40.2727	98.9694	764.156	8.05108
U379		4293.35	38.3005	4.2609	0.671466	0.122224	0.101255	1.19949	0.866839	3.54979	0.0621179	3.34099	0.337904	621.759	7.11732	633.85	16.742	677.209	71.5646	91.8119	621.759	7.11732
U380		84717.4	26.6721	22.4625	0.631538	0.0209659	0.676418	0.961752	25.2624	1.35828	0.27099	0.959139	0.708068	3330.6	25.0792	3318.41	13.4571	3311.06	16.8199	100.59	3311.06	16.8199
U381		561564	363.71	186.545	0.386135	0.0154319	0.45754	0.974884	11.1312	1.2683	0.176526	0.811293	0.768652	2428.69	19.7706	2534.18	11.9416	2619.75	15.0589	92.7067	2619.75	15.0589
U382		10712.3	85.351	10.843	0.837128	0.0453346	0.110906	1.0785	0.953433	2.1831	0.0623777	1.89809	0.494021	678.007	6.95034	679.889	10.8291	686.125	40.7793	98.8168	678.007	6.95034
U383		23325.3	122.664	19.5629	0.475317	0.0766434	0.151046	1.00428	1.44136	1.84886	0.0692401	1.55233	0.543187	906.823	8.50932	906.285	11.1006	904.974	32.3561	100.204	906.823	8.50932
U384		246697	293.939	89.7248	0.108167	b.d.	0.299979	1.07181	6.16273	1.37654	0.149065	0.863773	0.778622	1691.21	15.9694	1999.18	12.1024	2334.46	16.089	72.4452
U385		9803.56	45.9825	8.69516	0.810615	0.134419	0.165203	1.13462	1.63612	2.47771	0.0718609	2.20266	0.45793	985.625	10.3835	984.22	15.6289	981.087	45.1305	100.463	985.625	10.3835
U386		41317.4	186.432	36.0563	0.697559	0.0275401	0.173829	0.90115	1.73929	1.43202	0.0726008	1.11292	0.629288	1033.18	8.62042	1023.2	9.25852	1001.92	23.1281	103.12	1001.92	23.1281
U387		10268.8	52.2888	8.81339	0.668207	0.317885	0.150906	1.3802	1.41691	3.02607	0.0681284	2.69298	0.456103	906.042	11.6762	896.065	18.0235	871.531	55.9969	103.96	906.042	11.6762
U388		19874.2	30.2174	13.0859	1.28361	0.0932738	0.336178	1.15553	5.20458	1.93853	0.112334	1.55649	0.596085	1868.26	18.7681	1853.37	16.5591	1836.7	28.7762	101.718	1836.7	28.7762
U389		14042.1	100.059	12.7916	0.365141	0.0200304	0.125914	0.998487	1.11316	2.21298	0.0641472	1.97492	0.451196	764.511	7.20989	759.692	11.848	745.536	42.0099	102.545	764.511	7.20989
U390		12350.6	64.5725	11.3234	0.85321	0.0712627	0.151467	1.05139	1.46445	2.06687	0.0701536	1.77947	0.50869	909.183	8.92887	915.844	12.4864	931.93	36.8419	97.5592	909.183	8.92887
U391		6870.45	34.0515	5.90576	0.483277	0.0171204	0.165665	1.21604	1.61274	2.54566	0.0706363	2.23643	0.47769	988.18	11.1534	975.172	15.9688	945.985	46.0562	104.46	988.18	11.1534
U392		2432.68	12.6265	2.05753	0.336649	0.366461	0.161324	1.65107	1.47929	4.53734	0.0665351	4.22627	0.363885	964.129	14.7942	921.942	27.4961	822.315	88.367	117.246
U393		11548.6	51.2515	9.2708	0.47291	0.0950958	0.171225	1.06223	1.72999	2.20796	0.0733111	1.93566	0.481091	1018.86	10.0255	1019.75	14.224	1021.65	39.4928	99.7262	1021.65	39.4928
U394		6826.19	33.3838	6.00576	0.725807	0.0381042	0.160803	1.17156	1.58658	2.62721	0.0715915	2.35153	0.445934	961.237	10.4747	964.954	16.376	973.433	48.2008	98.7471	961.237	10.4747
U395		95606.3	51.6703	32.9628	0.51914	0.0182207	0.551459	1.01517	14.8833	1.35542	0.19583	0.898103	0.748972	2831.24	23.3103	2807.8	13.0368	2791.02	16.2371	101.441	2791.02	16.2371
U396		7084.14	52.3709	5.55733	0.391837	1.34193	0.101207	1.48223	0.984418	7.79143	0.070577	7.64914	0.190239	621.478	8.78795	695.868	39.2487	944.267	156.752	65.8159
U397		4377.2	39.7458	4.27828	0.40074	0.121456	0.104885	1.26939	0.868537	3.47162	0.0600853	3.23122	0.365649	642.974	7.77565	634.772	16.3908	605.677	70.0432	106.158	642.974	7.77565
U398		7596.53	39.3158	6.34944	0.470141	0.0291403	0.153169	1.23527	1.49873	2.67186	0.070998	2.36917	0.462325	918.701	10.5883	929.869	16.2845	956.438	48.6829	96.0545	918.701	10.5883
U399		3419.77	34.2125	3.98724	1.1162	0.00747976	0.0963724	1.43912	0.801422	3.32244	0.0603396	2.99459	0.433151	593.114	8.16088	597.63	15.0138	614.805	64.8385	96.472	593.114	8.16088
U400		59096.8	38.8143	23.4653	0.7012	0.064674	0.510818	1.04298	12.7069	1.44399	0.180496	0.998653	0.722288	2660.12	22.777	2658.17	13.712	2656.68	17.8687	100.129	2656.68	17.8687
U401		15682.9	69.4085	15.7682	1.38621	0.0164855	0.176615	1.01025	1.82569	1.80377	0.0750056	1.49431	0.560076	1048.46	9.79158	1054.73	11.8552	1067.75	30.4507	98.1932	1067.75	30.4507
U402		7921.88	47.3219	7.19357	0.545773	0.330811	0.141159	1.17779	1.28198	2.78726	0.0658972	2.52619	0.422562	851.212	9.40283	837.734	15.9095	802.17	53.1263	106.114	851.212	9.40283
U403		92427.5	65.0164	37.9122	0.852025	0.0552471	0.476456	0.928317	10.9178	1.37855	0.166267	1.01914	0.6734	2511.81	19.3582	2516.15	12.9367	2519.66	18.3342	99.6887	2519.66	18.3342
U404		11795.5	51.4769	9.07167	0.458984	0.309947	0.165212	1.09293	1.67901	2.48549	0.0737403	2.23231	0.439723	985.677	10.0035	1000.61	15.8315	1033.46	45.3773	95.3765	1033.46	45.3773
U405		16613.7	108.498	17.2761	1.17484	0.0104555	0.127686	1.01835	1.16272	1.76458	0.0660734	1.44107	0.57711	774.651	7.44469	783.234	9.64736	807.762	30.5313	95.901	774.651	7.44469
U406		29709.8	167.649	25.6987	0.479416	0.0282827	0.144744	0.957824	1.35831	1.60558	0.0680912	1.28859	0.596558	871.435	7.82114	871.143	9.40856	870.401	27.1312	100.119	871.435	7.82114
U407		8089.01	61.8089	10.1233	0.21743	0.47873	0.169158	1.37478	1.41863	3.25386	0.0608515	2.94916	0.422508	1007.47	12.8338	896.79	19.3885	633.022	63.6685	159.153
U408		387045	146.908	55.3706	0.543383	7.53726	0.212315	2.26307	7.67952	2.77434	0.262451	1.60484	0.815712	1241.14	25.558	2194.21	24.9692	3260.77	26.3382	38.0628
U409		7930.97	36.3459	6.67198	0.651185	0.240253	0.164376	1.11934	1.61413	2.79154	0.0712515	2.5573	0.400976	981.048	10.2	975.712	17.5145	963.719	52.4534	101.798	981.048	10.2
U410		19538.5	176.725	18.4727	0.246836	0.0189096	0.10635	0.926782	0.892708	1.86339	0.0609066	1.61657	0.497364	651.518	5.75361	647.823	8.93485	634.968	35.1017	102.606	651.518	5.75361
U411		5844.56	39.0782	6.28061	1.24846	0.0902366	0.126669	1.12367	1.14773	2.81813	0.0657451	2.58442	0.398729	768.837	8.15428	776.172	15.3007	797.329	54.3825	96.4266	768.837	8.15428
U412		4692.57	42.1078	4.721	0.548257	0.0864237	0.105229	1.18753	0.890957	3.09838	0.0614348	2.86177	0.383274	644.981	7.29678	646.883	14.8296	653.528	61.5843	98.6922	644.981	7.29678
U413		1472.02	16.7148	1.2612	0.00213755	0.0506813	0.082208	1.87979	0.663305	5.35811	0.0585454	5.01754	0.350831	509.289	9.2092	516.634	21.699	549.251	109.662	92.7242	509.289	9.2092
U414		136733	88.2677	44.0563	0.399315	0.0265016	0.439311	0.994095	11.4775	1.33353	0.189569	0.888869	0.745459	2347.56	19.6	2562.75	12.5766	2737.69	16.1371	85.7495
U415		5175.43	25.3506	4.73275	0.78039	0.182667	0.163951	1.26518	1.59545	3.15497	0.0706092	2.89018	0.401012	978.698	11.5001	968.43	19.7033	945.201	59.3918	103.544	978.698	11.5001
U416		14895.1	121.312	15.4106	0.759726	0.039062	0.113014	1.01071	0.972806	1.98657	0.0624579	1.71024	0.508772	690.229	6.62603	689.909	9.95769	688.864	36.7831	100.198	690.229	6.62603
U417		47127.5	56.0432	24.0689	0.705863	0.0211352	0.370861	0.996921	6.63701	1.47976	0.129854	1.09354	0.673707	2033.45	17.4199	2064.28	13.133	2095.2	20.1489	97.053	2095.2	20.1489
U418		58401.5	37.6351	23.4646	0.869935	0.171352	0.504062	1.03393	12.5187	1.46278	0.180205	1.03476	0.70682	2631.23	22.3814	2644.13	13.8712	2654.02	18.4277	99.1415	2654.02	18.4277
U419		5613.7	46.8677	5.55166	0.481903	0.188085	0.113157	1.20266	0.933839	3.19083	0.0598805	2.9555	0.376912	691.056	7.88976	669.652	15.652	598.284	64.172	115.506
U425		10045.2	34.5713	6.888	0.500699	2.27445	0.179443	1.20246	1.84423	2.90352	0.074573	2.64282	0.414138	1063.93	11.8071	1061.37	19.13	1056.11	53.4506	100.741	1056.11	53.4506
U426		103856	77.2664	57.6293	1.99772	0.00115266	0.518203	0.916745	11.4943	1.30892	0.160945	0.934258	0.700385	2691.55	20.2228	2564.12	12.3505	2464.86	17.0648	109.197	2464.86	17.0648
U427		13863	85.8763	12.3642	0.530828	0.0897695	0.134537	1.01546	1.25835	2.18052	0.0678663	1.92964	0.465697	813.697	7.77475	827.167	12.3495	863.54	40.3138	94.228	813.697	7.77475
U428		45207.5	215.891	41.939	0.854248	0.0343995	0.167852	0.936824	1.6653	1.50349	0.0719879	1.17594	0.6231	1000.26	8.69638	995.395	9.56241	984.683	24.438	101.582	1000.26	8.69638
U429		11063.3	102.41	12.8015	1.32073	0.324062	0.0971395	1.29149	0.820243	3.10407	0.061269	2.82264	0.416064	597.623	7.37822	608.184	14.2088	647.724	60.8047	92.2651	597.623	7.37822
U430		4900.71	38.5914	5.77424	1.42733	0.159503	0.114361	1.23071	0.991273	3.21899	0.0628942	2.97443	0.382329	698.023	8.15046	699.37	16.2779	703.698	63.4745	99.1936	698.023	8.15046
U431		102466	62.4108	36.8818	0.44431	0.0199741	0.521785	1.00589	13.2261	1.37867	0.183923	0.942822	0.729609	2706.75	22.2806	2695.92	13.1432	2687.82	16.9876	100.704	2687.82	16.9876
U432		11369.1	68.3447	10.3589	0.880337	0.487336	0.127215	1.05974	1.13874	2.56241	0.0649501	2.33301	0.41357	771.958	7.72094	771.911	13.863	771.775	49.3329	100.024	771.958	7.72094
U433		28489.7	156.174	22.9646	0.125674	0.0470613	0.153332	0.956116	1.46109	1.5914	0.0691412	1.27216	0.600802	919.617	8.20899	914.458	9.61322	902.027	26.6731	101.95	919.617	8.20899
U434		26036.2	120.974	20.8814	0.285414	0.0210004	0.171958	0.973728	1.73772	1.66727	0.0733246	1.35338	0.584027	1022.89	9.2264	1022.62	10.7679	1022.03	27.8375	100.085	1022.03	27.8375
U435		15477.5	87.1912	13.7585	0.498528	0.0436177	0.148888	1.09746	1.41118	1.80861	0.0687729	1.43759	0.606797	894.725	9.18077	893.655	10.7652	891.007	30.0822	100.417	894.725	9.18077
U436		66454.3	260.061	57.9356	0.834666	0.0101008	0.193634	0.913181	2.06523	1.46586	0.0773894	1.14667	0.622966	1141.03	9.5691	1137.35	10.0581	1130.34	23.3891	100.945	1130.34	23.3891
U437		69482.9	48.7009	26.7143	0.557419	0.0241958	0.4763	0.960161	10.9497	1.34061	0.166807	0.935587	0.716213	2511.13	20.0147	2518.86	12.5902	2525.1	17.0256	99.4467	2525.1	17.0256
U438		11314.8	99.635	10.9634	0.276607	0.0356372	0.11115	0.996381	0.937476	2.07511	0.0611993	1.82025	0.480158	679.421	6.43536	671.56	10.2054	645.281	39.3864	105.291	679.421	6.43536
U439		6968.1	56.2003	6.02993	0.0655626	0.136813	0.114151	1.13046	0.97849	2.59529	0.0621973	2.33615	0.435582	696.809	7.47566	692.83	13.0413	679.938	50.1291	102.481	696.809	7.47566
U440		15882.3	109.531	16.5962	0.905809	0.0362121	0.130142	0.935281	1.15714	1.95057	0.0645155	1.71171	0.479492	788.673	6.95575	780.609	10.6375	757.626	36.418	104.098	788.673	6.95575
U441		23679.6	162.569	35.7988	2.97541	0.00600089	0.128644	0.893769	1.16165	1.69317	0.0655214	1.43806	0.527866	780.122	6.58036	782.732	9.25425	790.179	30.5504	98.7273	780.122	6.58036
Sample Dol 20 (Dolphin 1 borehole, Early Miocene)
U442		4391.66	64.6299	10.0964	2.98461	0.0499468	0.091451	1.34286	0.529946	5.58917	0.0420472	5.42545	0.240261	564.113	7.25953
U443		23991.7	116.198	21.8321	1.73831	1.11096	0.128383	0.989826	1.40058	2.70354	0.0791583	2.51583	0.366121	778.632	7.27177	889.182	16.0275	1175.21	50.0354	66.2549
U444		5961.62	35.3278	5.66517	0.633081	0.014313	0.14797	1.15194	1.3967	3.12895	0.0684893	2.90919	0.368154	889.574	9.58353	887.538	18.5246	882.468	60.3581	100.805	889.574	9.58353
U445		9326.03	36.7639	7.31599	0.387201	0.119169	0.19194	1.13835	2.00946	2.52903	0.0759643	2.25835	0.450112	1131.87	11.8324	1118.71	17.1633	1093.23	45.5016	103.535	1093.23	45.5016
U446		13853.9	120.624	14.7078	0.782245	0.609304	0.10606	1.21218	0.822294	2.868	0.0562561	2.59924	0.422658	649.825	7.50112	609.327	13.1472	461.493	57.793	140.809
U447		38968.1	350.482	34.3025	0.0722978	0.0083711	0.104384	0.905437	0.873031	1.42005	0.0606863	1.09395	0.63761	640.049	5.52745	637.212	6.7347	627.166	24.0249	102.054	640.049	5.52745
U448		10538.2	82.7466	10.4584	0.459225	0.0521507	0.121507	1.02195	1.05385	2.35421	0.0629316	2.12083	0.434094	739.233	7.14846	730.786	12.2755	704.965	45.3681	104.861	739.233	7.14846
U449		8051.35	43.4775	7.13831	0.598354	0.0946069	0.150633	1.20608	1.46203	2.59336	0.0704253	2.29584	0.465065	904.512	10.1899	914.845	15.6494	939.856	47.3097	96.2394	904.512	10.1899
U450		16984.9	82.2779	16.2119	1.0387	0.0487211	0.163195	0.989985	1.61803	1.81927	0.0719405	1.52633	0.544165	974.508	8.96884	977.227	11.436	983.343	31.4632	99.1015	974.508	8.96884
U451		176512	139.096	79.1571	1.11018	0.0734263	0.438257	0.863419	9.87435	1.17893	0.163483	0.802728	0.732378	2342.83	17.0065	2423.12	10.994	2491.25	15.0151	94.0424	2491.25	15.0151
U452		4679.25	45.219	4.81399	0.583471	0.0853927	0.0988281	1.24677	0.803634	2.95689	0.0590027	2.68119	0.421649	607.537	7.23593	598.876	13.3837	566.216	58.5592	107.298	607.537	7.23593
U453		7520.34	58.4801	6.83994	0.275753	0.0661646	0.117713	1.13765	1.0241	2.62578	0.0631265	2.36653	0.433262	717.385	7.73314	715.97	13.4984	711.539	50.5177	100.822	717.385	7.73314
U454		1579.09	15.2994	1.51245	0.225491	0.997538	0.0994593	1.72053	0.768032	6.42333	0.0560309	6.18861	0.267857	611.24	10.0387	578.633	28.3349	452.596	137.47	135.052
U455		3545.9	35.3578	4.04339	0.953638	0.0983666	0.097819	1.2864	0.800394	3.64838	0.059371	3.41406	0.352596	601.615	7.39604	597.051	16.474	579.751	74.3103	103.771	601.615	7.39604
U456		17392.7	116.514	17.0877	0.788206	0.0701874	0.128301	1.00572	1.16027	1.92702	0.065618	1.64376	0.521906	778.167	7.38405	782.083	10.5226	793.27	34.8046	98.0962	778.167	7.38405
U457		10927.9	107.177	10.3567	0.205827	0.0898976	0.0990828	1.10081	0.815985	2.51518	0.0597555	2.2615	0.437668	609.031	6.40564	605.806	11.4828	593.76	49.2288	102.572	609.031	6.40564
U458		10464.6	70.1184	12.4414	1.47119	0.0301594	0.135884	1.02762	1.22017	2.13506	0.0651548	1.87148	0.48131	821.343	7.93692	809.852	11.9271	778.392	39.6336	105.518	821.343	7.93692
U459		9021.24	71.0728	9.28564	0.746544	0.0548288	0.116164	1.04054	1.00014	2.42866	0.0624718	2.19446	0.428444	708.449	6.99138	703.883	12.3403	689.339	47.0446	102.772	708.449	6.99138
U460		3705.97	24.9323	4.44137	1.63945	0.113015	0.131589	1.3759	1.19821	3.67965	0.0660705	3.41272	0.373922	796.924	10.323	799.76	20.373	807.669	71.5776	98.6696	796.924	10.323
U461		38270.4	227.411	28.5923	0.782188	3.54879	0.102738	1.10348	0.841062	3.83625	0.0594007	3.67411	0.287646	630.434	6.63596	619.732	17.7999	580.836	79.9353	108.539	630.434	6.63596
U462		4721.73	34.3532	4.86007	0.84145	0.145344	0.122776	1.23312	1.08508	2.84356	0.0641273	2.56227	0.433654	746.519	8.70162	746.11	15.0341	744.882	54.3703	100.22	746.519	8.70162
U463		7162.13	53.763	7.21769	0.489121	0.0614663	0.127971	1.08313	1.10707	2.38356	0.0627707	2.12325	0.454419	776.28	7.9325	756.763	12.7264	699.515	45.4589	110.974
U464		20428.1	95.5116	15.9097	0.34607	0.312018	0.161466	1.00319	1.62859	1.9929	0.0731855	1.72199	0.503382	964.921	9.00515	981.316	12.555	1018.18	35.224	94.769	1018.18	35.224
U465		69561	344.327	52.1795	0.13862	0.161913	0.156069	0.980774	1.5279	1.44213	0.0710348	1.05727	0.680086	934.896	8.54998	941.655	8.87367	957.496	22.1595	97.6397	934.896	8.54998
U466		2582.17	28.0677	3.69493	1.88769	0.0719082	0.0926037	1.44427	0.745159	4.05965	0.0583868	3.79405	0.355762	570.917	7.8969	565.411	17.605	543.322	83.0583	105.079	570.917	7.8969
U467		103326	370.515	41.1411	0.312056	12.0871	0.0854145	1.21591	0.687076	4.27392	0.058367	4.09731	0.284495	528.361	6.17463	531.042	17.6773	542.581	89.6891	97.3791	528.361	6.17463
U468		19986.1	101.048	17.7481	0.65321	0.0841027	0.159425	0.995088	1.55922	1.78166	0.0709651	1.47788	0.558516	953.579	8.83524	954.157	11.041	955.489	30.6126	99.8002	953.579	8.83524
U469		26778.6	187.387	21.6373	0.205841	0.775057	0.115953	0.949273	1.04348	1.65281	0.0652976	1.35302	0.574339	707.229	6.36962	725.65	8.58392	782.996	28.8201	90.3235	707.229	6.36962
U470		59403	47.1047	28.4582	1.23719	0.0349816	0.462053	0.973412	10.2256	1.48965	0.16058	1.12762	0.653451	2448.61	19.8742	2455.4	13.879	2461.02	20.1294	99.496	2461.02	20.1294
U471		26728.1	71.2622	10.409	0.259061	16.9666	0.111552	1.69547	0.927181	6.81465	0.0603087	6.60036	0.248798	681.757	10.9748	666.15	33.2932	613.696	142.65	111.09
U472		15659.7	80.6832	13.7785	0.511223	0.0416674	0.160982	0.94484	1.58528	1.84674	0.0714535	1.58673	0.511626	962.229	8.46121	964.445	11.517	969.499	32.7445	99.2502	962.229	8.46121
U473		9156.65	63.9286	9.29401	0.688373	0.0668733	0.131769	1.1155	1.18185	2.5024	0.0650794	2.24002	0.445772	797.952	8.38318	792.177	13.7739	775.958	47.3538	102.834	797.952	8.38318
U474		12880.3	93.6177	11.8305	0.439151	0.11103	0.121018	1.11294	1.07584	2.36471	0.0645048	2.08644	0.470646	736.421	7.75513	741.601	12.4543	757.276	44.2708	97.246	736.421	7.75513
U475		9053.79	64.1815	6.73292	0.378211	2.28938	0.0974399	1.1789	0.853698	3.97478	0.0635714	3.79593	0.296594	599.388	6.75523	626.676	18.5918	726.447	80.6226	82.5096
U476		19556.3	137.971	22.5583	1.3134	0.0591616	0.127496	1.07412	1.14071	1.96598	0.0649189	1.64662	0.546352	773.565	7.84076	772.844	10.6501	770.761	34.9855	100.364	773.565	7.84076
U477		16134	163.52	17.0749	0.542062	0.0244498	0.0986358	0.930317	0.815309	1.93795	0.0599766	1.70005	0.480052	606.409	5.39408	605.428	8.84738	601.756	37.0823	100.773	606.409	5.39408
U478		17994	89.4495	15.3075	0.39761	0.0997405	0.16526	1.0473	1.64524	1.83755	0.072236	1.50988	0.569945	985.944	9.58943	987.725	11.6241	991.684	31.095	99.4212	985.944	9.58943
U479		13487.6	60.161	11.3234	0.582087	0.0218751	0.173649	1.02208	1.78878	2.08492	0.0747442	1.81721	0.490226	1032.18	9.76413	1041.38	13.5973	1060.73	36.906	97.3092	1060.73	36.906
U485		33676.6	38.7205	16.6532	0.46322	0.0543908	0.392943	0.954988	7.1486	1.54061	0.132004	1.20892	0.619877	2136.46	17.4041	2130.12	13.7996	2124	22.0338	100.587	2124	22.0338
U486		12848.6	127.688	13.1528	0.463849	0.0916339	0.0986106	1.06596	0.803605	2.1362	0.0591307	1.85124	0.498997	606.261	6.17643	598.86	9.67293	570.933	40.5357	106.188	606.261	6.17643
U487		3596.54	37.2275	4.01954	0.755791	0.0429881	0.0972569	1.2608	0.813798	3.35175	0.0607142	3.10558	0.376161	598.313	7.21113	604.583	15.2752	628.156	67.0816	95.249	598.313	7.21113
U488		21713.8	151.317	25.7579	1.42022	0.0106236	0.130836	0.918502	1.18842	1.85925	0.0659079	1.61653	0.494017	792.632	6.86366	795.228	10.2662	802.509	34.1904	98.7692	792.632	6.86366
U489		6830.23	62.6009	7.22605	0.67044	0.0445157	0.105016	1.16837	0.881541	2.62883	0.0609087	2.35492	0.444445	643.74	7.1662	641.815	12.5137	635.044	50.8987	101.369	643.74	7.1662
U490		123335	381.841	38.4525	0.293326	12.9282	0.0686842	1.89683	0.601321	4.48501	0.0635249	4.06415	0.422926	428.223	7.86209	478.072	17.1041	724.896	86.3224	59.0737
U491		14674.3	110.514	12.7418	0.354901	0.577708	0.111784	1.13083	0.994787	2.13799	0.064572	1.81444	0.528924	683.1	7.33862	701.16	10.8365	759.474	38.5568	89.9438	683.1	7.33862
U492		17022.9	103.423	15.8894	0.501758	0.0107492	0.145669	0.977068	1.35604	1.78294	0.0675459	1.49139	0.548008	876.641	8.02223	870.166	10.4366	853.718	31.3534	102.685	876.641	8.02223
U493		17225.1	92.7086	16.7448	0.756072	0.0582122	0.160302	1.01802	1.55587	1.98512	0.0704251	1.70421	0.512827	958.455	9.08106	952.827	12.2872	939.851	35.2701	101.979	958.455	9.08106
U494		58732.1	74.9988	32.9832	1.00563	0.0133407	0.359629	0.978851	6.5477	1.40607	0.132108	1.0094	0.696161	1980.41	16.7241	2052.34	12.4638	2125.39	18.6987	93.179	2125.39	18.6987
U495		27812.1	230.81	24.888	0.0953913	0.00193071	0.114225	0.839864	0.981193	1.56637	0.0623287	1.32218	0.536184	697.238	5.5628	694.217	7.89098	684.444	28.6099	101.869	697.238	5.5628
U496		9286.41	74.8441	8.73828	0.342994	0.0345122	0.115186	1.08938	1.00235	2.45877	0.0631412	2.20427	0.443059	702.797	7.26329	705.002	12.5068	712.033	47.081	98.7028	702.797	7.26329
U497		38718.2	144.369	27.4384	0.527423	1.58633	0.170785	0.943795	1.78082	1.91542	0.0756596	1.66676	0.492735	1016.43	8.89164	1038.48	12.4749	1085.18	33.7911	93.6653	1085.18	33.7911
U498		13300.7	92.1916	10.8242	0.586542	2.42303	0.103862	1.25572	0.892185	3.93412	0.0623294	3.72834	0.319187	637.001	7.62407	647.543	18.8403	684.471	79.7337	93.0647	637.001	7.62407
U499		5608.88	65.1712	5.48528	0.214356	0.106031	0.0862502	1.1047	0.681208	2.91078	0.0573079	2.69301	0.37952	533.322	5.66166	527.505	11.981	502.41	59.4501	106.153	533.322	5.66166
U500		35018.7	174.78	34.8037	0.987827	0.019282	0.167333	0.907146	1.64408	1.55219	0.0712914	1.25952	0.584428	997.398	8.39962	987.282	9.82293	964.862	26.18	103.372	997.398	8.39962
U501		23254.7	205.96	21.5584	0.122672	0.0283108	0.109989	0.898755	0.93284	1.61958	0.0615391	1.34732	0.554932	672.685	5.75231	669.128	7.94978	657.167	29.2641	102.361	672.685	5.75231
U502		10655.9	100.382	10.2578	0.321182	0.0702116	0.101468	1.03247	0.846345	2.246	0.0605217	1.99463	0.45969	623.008	6.14035	622.641	10.4624	621.308	43.278	100.274	623.008	6.14035
U503		17919.3	124.111	16.7635	0.476039	0.0130009	0.12857	0.976657	1.17107	1.77476	0.0660898	1.48187	0.550303	779.705	7.18466	787.144	9.735	808.279	31.3723	96.4648	779.705	7.18466
U504		343371	238.668	137.89	0.633945	0.0100413	0.493464	0.852388	12.1376	1.13203	0.178472	0.744938	0.752971	2585.65	18.2085	2615.1	10.7674	2637.98	14.0694	98.0162	2637.98	14.0694
U505		3233.77	35.7767	4.62885	1.91744	0.4036	0.0895145	1.57046	0.692674	4.59625	0.0561474	4.31962	0.341683	552.665	8.32301	534.406	19.1015	457.203	95.9311	120.88
U506		139233	89.2294	64.5101	1.59024	0.0417806	0.513704	0.943293	12.89	1.27115	0.182069	0.852065	0.74208	2672.42	20.686	2671.65	12.1148	2671.06	15.634	100.051	2671.06	15.634
U507		220206	178.958	90.8623	0.461094	0.0044958	0.453445	0.907417	10.3277	1.22193	0.165262	0.818353	0.742611	2410.55	18.295	2464.59	11.4354	2509.47	15.2394	96.0583	2509.47	15.2394
U508		69261.8	105.936	52.6814	2.03525	0.00467356	0.332139	0.907479	5.28131	1.34317	0.115376	0.990242	0.675627	1848.74	14.6191	1865.85	11.537	1884.96	18.7591	98.0786	1884.96	18.7591
U509		20219.1	258.498	23.2269	0.69272	0.0222202	0.081448	0.921569	0.645748	1.73172	0.0575277	1.46613	0.532171	504.76	4.4824	505.859	6.90789	510.832	32.5418	98.8114	504.76	4.4824
U510		6704.68	61.3985	6.92457	0.498011	0.0305757	0.107278	1.15548	0.910015	2.46175	0.0615508	2.17372	0.469373	656.918	7.22514	657.065	11.9176	657.573	46.8441	99.9003	656.918	7.22514
U511		15498	100.225	19.7028	1.85006	0.033144	0.13831	0.992726	1.27054	1.98359	0.0666548	1.7173	0.500469	835.097	7.78852	832.634	11.2847	826.067	36.1506	101.093	835.097	7.78852
U512		8436.57	46.9312	9.29526	1.2947	0.0560453	0.15637	1.15232	1.5127	2.3609	0.0701929	2.06058	0.488085	936.572	10.0574	935.531	14.4458	933.08	42.5597	100.374	936.572	10.0574
U513		26130.2	185.756	22.4082	0.298802	0.0707721	0.119221	1.04005	1.06395	1.64642	0.0647536	1.27632	0.631703	726.079	7.15236	735.771	8.63224	765.393	27.3043	94.8636	726.079	7.15236
U514		27484.3	133.562	22.9705	0.325421	0.0811285	0.169039	0.959952	1.67869	1.79143	0.0720573	1.51252	0.535858	1006.81	8.96418	1000.48	11.4196	986.645	31.1706	102.044	1006.81	8.96418
U515		71945.8	56.3893	31.9732	0.86294	0.0142366	0.465406	0.991195	10.4606	1.39993	0.163086	0.988604	0.708032	2463.38	20.336	2476.43	13.0832	2487.15	17.8921	99.0442	2487.15	17.8921
U516		11893.5	105.306	11.4193	0.622172	1.36472	0.0977697	1.12406	0.791655	2.90439	0.0587524	2.67806	0.38702	601.325	6.46158	592.11	13.0369	556.953	58.5818	107.967	601.325	6.46158
U517		26270	219.202	25.6397	0.432137	0.0236759	0.112644	0.903349	0.967659	1.69177	0.0623313	1.4304	0.533967	688.088	5.90707	687.256	8.46072	684.536	30.8914	100.519	688.088	5.90707
U518		36710.3	226.723	32.7686	0.339661	0.0177904	0.142181	0.871187	1.32823	1.48377	0.0677834	1.20108	0.587145	856.986	7.00599	858.107	8.61473	861.004	25.3835	99.5333	856.986	7.00599
U519		17088.5	86.7545	14.4747	0.394677	0.0618264	0.161255	1.03897	1.59246	1.87252	0.0716558	1.55784	0.554852	963.746	9.3148	967.263	11.6977	975.264	32.1347	98.819	963.746	9.3148
U520		51698.1	261.657	44.9259	0.384747	0.000377159	0.167187	0.905978	1.65086	1.32709	0.0716475	0.969733	0.682678	996.593	8.38259	989.879	8.41875	975.027	20.3702	102.212	996.593	8.38259
U521		8775.84	92.6532	9.15711	0.452397	0.00875132	0.0953936	1.11606	0.778144	2.50298	0.0591881	2.24038	0.445893	587.357	6.27336	584.424	11.129	573.045	48.9404	102.498	587.357	6.27336
U522		13730	132.292	13.3779	0.235942	0.060998	0.102922	0.997577	0.851831	1.97335	0.0600537	1.70263	0.505525	631.51	6.01057	625.654	9.22674	604.536	37.121	104.462	631.51	6.01057
U523		11392.2	66.4928	10.7085	0.698124	0.032146	0.144544	1.20968	1.41664	2.27337	0.0711137	1.92482	0.532106	870.307	9.85916	895.951	13.5453	959.763	39.6354	90.6793	870.307	9.85916
U524		16617.9	87.3059	15.0069	0.573786	0.0278303	0.159631	1.01145	1.56598	1.77099	0.0711806	1.45375	0.571119	954.729	8.99004	956.836	10.9936	961.686	30.0985	99.2766	954.729	8.99004
U525		6416.89	54.2209	5.96806	0.346874	0.0451448	0.108251	1.15157	0.939571	2.71487	0.0629783	2.45854	0.424171	662.584	7.25975	672.657	13.3616	706.54	52.5074	93.7787	662.584	7.25975
U526		5283.66	56.6128	8.77928	2.55175	0.0751882	0.0983062	1.11573	0.797185	3.32292	0.05884	3.13	0.335769	604.475	6.4459	595.24	14.9718	560.199	68.3752	107.904	604.475	6.4459
U527		2465.44	24.8151	2.59554	0.525206	0.538557	0.0986201	1.72458	0.779101	5.90579	0.0573221	5.64838	0.292015	606.317	9.98502	584.97	26.2634	502.956	124.402	120.551
U528		28445.1	253.955	29.0462	0.507726	0.0158484	0.108374	0.953367	0.91143	1.6459	0.0610226	1.34167	0.579237	663.301	6.0197	657.818	7.98145	639.063	29.2276	103.793	663.301	6.0197
U529		166922	115.856	72.324	0.988596	0.00127878	0.498905	0.951924	12.0669	1.26977	0.175498	0.840325	0.749685	2609.09	20.4728	2609.62	12.0378	2610.03	15.5	99.9639	2610.03	15.5
U530		7329.17	49.6598	6.60049	0.37051	0.0035603	0.130208	1.18057	1.19879	2.56678	0.0668035	2.27917	0.459943	789.052	8.77795	800.027	14.2199	830.714	47.7622	94.9848	789.052	8.77795
U531		6342.92	44.7159	6.81151	1.04151	0.112886	0.12606	1.16948	1.14497	2.95582	0.065904	2.71462	0.395653	765.349	8.44961	774.866	16.0293	802.385	57.0563	95.3843	765.349	8.44961
U532		24315.3	31.6471	15.5317	1.38834	0.0579681	0.370857	1.14626	6.37751	1.87505	0.124778	1.48388	0.61132	2033.43	20.0196	2029.18	16.516	2024.86	26.9564	100.424	2024.86	26.9564
U533		3487.82	36.0867	4.30916	1.25019	0.0139685	0.0952618	1.2997	0.797076	3.82248	0.0607121	3.59473	0.340016	586.581	7.29399	595.178	17.2198	628.079	77.6019	93.3929	586.581	7.29399
U534		74555.5	116.815	45.0501	0.667217	0.0138901	0.341315	0.861613	5.35628	1.29705	0.113868	0.969519	0.664286	1892.99	14.1699	1877.89	11.1713	1861.23	18.444	101.707	1861.23	18.444
U535		14325	61.8786	12.2247	0.616764	0.0216491	0.18027	1.08061	1.85098	1.99059	0.0745029	1.67174	0.54286	1068.45	10.655	1063.78	13.1425	1054.22	34.0397	101.35	1054.22	34.0397
U536		7477.34	37.1369	7.29433	1.00273	0.0377836	0.164327	1.26916	1.62419	2.54783	0.071717	2.20923	0.498133	980.779	11.5589	979.614	16.0257	977.003	45.2912	100.387	980.779	11.5589
U537		12590.9	109.897	14.4939	1.15215	0.078721	0.106406	1.01481	0.932989	2.23746	0.0636217	1.99409	0.453554	651.84	6.30114	669.206	10.975	728.125	42.5296	89.5232	651.84	6.30114
U538		26367.4	129.532	18.4084	0.861279	4.67469	0.110359	1.14794	0.870103	3.4439	0.0572078	3.24695	0.333325	674.835	7.36387	635.623	16.2757	498.562	71.6612	135.356
U539		7627.77	60.4269	7.69698	0.488452	0.0582483	0.121626	1.07996	1.06189	2.66797	0.0633505	2.43963	0.404785	739.914	7.55959	734.756	13.9606	719.062	52.002	102.9	739.914	7.55959
U545		11769.4	102.044	11.0097	0.178799	0.00736054	0.111657	0.992067	0.956366	1.94627	0.0621486	1.67445	0.509726	682.365	6.43391	681.412	9.67179	678.266	36.0865	100.604	682.365	6.43391
U546		40161.7	28.1486	17.7968	1.38366	b.d.	0.472021	1.07903	11.8531	1.70613	0.182207	1.32158	0.632442	2492.42	22.3446	2592.87	16.073	2672.32	22.8924	93.2678	2672.32	22.8924
U547		76062	109.709	45.083	0.954371	0.0411808	0.337654	0.958095	5.60968	1.38034	0.120548	0.993676	0.694101	1875.38	15.6226	1917.59	11.9665	1963.55	18.6875	95.5096	1963.55	18.6875
U548		15285.3	51.5289	11.4218	0.965295	2.66459	0.17867	1.40058	1.94968	3.78925	0.0791781	3.52091	0.369619	1059.7	13.698	1098.34	25.4424	1175.7	69.8414	90.1338	1175.7	69.8414
U549		9285.29	46.9352	9.04363	0.916155	0.121547	0.164158	1.13171	1.6195	2.55714	0.0715833	2.29307	0.44257	979.844	10.3007	977.796	16.0664	973.199	47.0169	100.683	979.844	10.3007
U550		13743.3	84.0132	12.8285	0.507155	0.0194974	0.144399	1.07941	1.36228	1.84452	0.0684536	1.4957	0.585199	869.489	8.79224	872.85	10.8169	881.388	31.3122	98.6499	869.489	8.79224
U551		7164.21	71.2499	8.67278	1.11862	0.0394823	0.099538	1.15011	0.815522	2.6016	0.0594485	2.33358	0.442077	611.701	6.71972	605.547	11.8732	582.584	50.8783	104.998	611.701	6.71972
U552		16921.5	146.092	15.8437	0.259265	0.455695	0.108623	1.01942	0.950218	2.22858	0.063474	1.98175	0.45743	664.745	6.44866	678.216	11.0351	723.197	42.3028	91.9176	664.745	6.44866
U553		16874.5	200.354	20.104	0.885608	0.0397206	0.0866602	0.944585	0.697579	1.82094	0.0584074	1.55679	0.518734	535.754	4.86452	537.344	7.60662	544.096	34.3279	98.4669	535.754	4.86452
U554		3208.7	33.0721	3.82215	0.936441	0.0492422	0.099118	1.33444	0.809489	3.96368	0.0592588	3.73229	0.336668	609.238	7.76443	602.168	18.0092	575.64	81.2676	105.837	609.238	7.76443
U555		11132.7	81.6993	11.8435	0.817108	0.056847	0.127849	1.08144	1.12111	2.20303	0.0636277	1.91933	0.490888	775.581	7.91343	763.507	11.8346	728.326	40.9537	106.488	775.581	7.91343
U556		68275.9	67.3532	29.9775	0.640786	0.213627	0.380602	1.1765	8.26871	1.58519	0.157638	1.06239	0.742182	2079.1	20.9376	2260.9	14.4413	2429.72	19.1305	85.5694
U557		27298.6	175.744	23.7732	0.244734	0.0173922	0.13671	0.878371	1.26505	1.71847	0.0671428	1.47703	0.511135	826.032	6.82432	830.172	9.76177	841.271	31.1167	98.1886	826.032	6.82432
U558		6321.51	60.4351	5.91613	0.143386	0.0451306	0.102477	1.18542	0.867857	2.60301	0.0614493	2.31742	0.455404	628.907	7.11106	634.403	12.2879	654.034	49.9401	96.1582	628.907	7.11106
U559		48348.1	314.523	30.7474	0.285424	1.99134	0.0913929	1.1249	0.82621	2.33878	0.0655952	2.05049	0.480976	563.77	6.07991	611.507	10.7519	792.542	43.2766	71.1344
U560		13934.1	77.5854	11.1612	0.399841	0.914975	0.135892	1.05609	1.26556	2.67192	0.0675743	2.45435	0.395255	821.391	8.15658	830.401	15.1657	854.591	51.2073	96.1151	821.391	8.15658
U561		28564.9	151.528	25.5926	0.503658	0.0321439	0.159068	1.0096	1.54738	1.62299	0.0705844	1.27076	0.622057	951.595	8.94631	949.45	10.0312	944.482	26.4823	100.753	951.595	8.94631
U562		29558.9	70.681	12.9536	0.479983	10.1532	0.140427	1.25979	1.23518	4.27818	0.0638227	4.08849	0.29447	847.074	10.0103	816.695	24.0117	734.807	86.6986	115.278
U563		18318.3	87.2541	16.2644	0.600165	0.16596	0.170656	0.919252	1.73354	2.12376	0.0737068	1.91451	0.432842	1015.72	8.6557	1021.07	13.6931	1032.54	39.0061	98.3711	1032.54	39.0061
U564		67066.5	45.4838	30.8147	1.27099	0.0112472	0.517258	1.00225	12.6079	1.44793	0.17686	1.04498	0.692198	2687.54	22.0732	2650.81	13.7403	2622.9	18.62	102.465	2622.9	18.62
U565		20529.2	155.404	18.1222	0.419119	0.343561	0.110661	1.00259	0.977095	1.89525	0.0640671	1.60835	0.529003	676.587	6.44974	692.114	9.52219	742.895	34.3355	91.0744	676.587	6.44974
U566		19163.4	173.299	19.1261	0.408779	0.0280673	0.107312	0.916844	0.919506	1.75644	0.0621727	1.49816	0.52199	657.119	5.73864	662.099	8.55521	679.093	32.3499	96.7643	657.119	5.73864
U567		14327.8	102.93	13.8784	0.526516	0.0149121	0.126933	1.0381	1.13147	1.98442	0.0646787	1.69123	0.523126	770.346	7.54889	768.454	10.7089	762.955	35.9598	100.969	770.346	7.54889
U568		54556.2	257.689	48.4404	0.620349	0.0318508	0.171683	0.882955	1.73468	1.39718	0.0733139	1.08282	0.631955	1021.38	8.35803	1021.49	9.02578	1021.73	22.4708	99.9653	1021.73	22.4708
U569		40392	307.371	33.4377	0.199207	b.d.	0.111812	1.1585	1.05177	1.65383	0.0682534	1.18027	0.700494	683.263	7.51943	729.757	8.6225	875.328	24.9079	78.058
U570		5153.83	49.8809	5.71713	0.702885	0.234383	0.103878	1.24986	0.849074	2.92612	0.0593086	2.64576	0.427137	637.093	7.58957	624.14	13.6497	577.466	57.6819	110.326	637.093	7.58957
U571		4838.3	45.9852	5.28142	0.637899	0.0923775	0.105393	1.15434	0.883568	3.39436	0.0608306	3.19204	0.340076	645.937	7.10332	642.908	16.1735	632.283	68.8937	102.159	645.937	7.10332
RM0 (n=24)		23564.3	290.003	26.2978	0.0248	0.0981205	0.0981	0.594024	0.812558	1.33295	0.0601004	1.01148	0.495195	603.264	3.42739	603.881	6.05761	606.168	21.9379	99.5506	603.264	3.42739
RM1 (n=12)		21870.4	219.459	20.0311	0.296074	0.0980889	0.0914608	0.919536	0.743333	1.52825	0.0589717	1.40511	0.543763	564.168	4.96688	564.342	6.60903	565.01	30.5839	99.9197	564.168	4.96688
RM2 (n=12)		41.274	2.42748	0.0331839	0.216285	0.0980889	0.01401	8.62093	0.103434	46.3098	0.0535833	46.1474	0.222157	89.6983	7.68523	99.7141	44.0669	269.564	1114.78	-15.6529
RM3 (n=12)		5754.07	23.4568	4.18258	0.287613	0.0980889	0.176425	1.23534	1.80742	4.63612	0.07434	4.91012	0.426756	1047.45	11.9289	1048.08	30.1957	1049.09	98.5738	100.053	1049.09	98.5738
RM0
A001	GJ1	21619.9	267.734	24.2978	0.0247095	0.0245508	0.09819	0.572629	0.8098	1.08478	0.05984	0.921329	0.527875	603.822	3.31644	602.341	4.94554	596.77	20.4794	101.182	603.822	3.31644
A002	GJ1	22171.9	274.533	24.8265	0.0250117	0.0176966	0.09787	0.400081	0.8083	0.718914	0.05993	0.597304	0.556507	601.889	2.32149	601.492	3.28844	599.997	13.7235	100.315	601.889	2.32149
A040	GJ1	26480.7	313.426	28.4886	0.0247483	0.0254593	0.09827	0.388269	0.8182	0.891215	0.06041	0.802191	0.435663	604.256	2.26275	607.03	4.09301	617.4	17.9199	97.871	604.256	2.26275
A041	GJ1	26274.8	311.216	28.2282	0.0249761	0.0232325	0.09805	0.370122	0.8199	0.981284	0.06067	0.908806	0.377182	602.971	2.15482	607.965	4.50773	626.623	20.1251	96.2254	602.971	2.15482
A080	GJ1	25758.8	300.016	27.2438	0.0246794	0.0118827	0.09825	0.445328	0.8118	0.920919	0.05995	0.806086	0.483569	604.15	2.58848	603.447	4.20973	600.808	18.0445	100.556	604.15	2.58848
A081	GJ1	24889	291.142	26.3455	0.0247245	0.0113169	0.09793	0.365134	0.8088	0.803033	0.05993	0.715219	0.454693	602.271	2.12407	601.782	3.66887	599.94	16.152	100.389	602.271	2.12407
A130	GJ1	25134	289.516	26.3233	0.0248326	0.0265077	0.09838	0.526497	0.8114	0.837362	0.05985	0.651134	0.628757	604.887	3.05704	603.258	3.8307	597.142	14.8326	101.297	604.887	3.05704
A131	GJ1	25058.5	288.038	26.1052	0.0244786	0.00407997	0.09807	0.433124	0.8146	0.871951	0.06027	0.756771	0.49673	603.101	2.5145	605.005	3.99564	612.14	16.9868	98.5234	603.101	2.5145
A190	GJ1	24752.6	281.806	25.6702	0.0247029	0.0110538	0.09855	0.453741	0.8201	1.08261	0.06038	0.982937	0.419117	605.925	2.64402	608.129	4.97044	616.349	21.7173	98.3086	605.925	2.64402
A191	GJ1	24744	288.266	25.9764	0.0246574	0.0207976	0.0975	0.498424	0.8028	0.935092	0.05975	0.791183	0.533021	599.713	2.87226	598.415	4.24767	593.502	17.7515	101.046	599.713	2.87226
A250	GJ1	24135.9	284.162	25.7879	0.0251614	0.0174622	0.09814	0.499894	0.8129	0.997885	0.0601	0.863643	0.500954	603.524	2.8981	604.069	4.56179	606.113	19.2369	99.5728	603.524	2.8981
A251	GJ1	23885.4	280.084	25.4054	0.0249221	0.0109163	0.09816	0.559479	0.8135	0.868825	0.06013	0.66471	0.643949	603.637	3.24006	604.411	3.97859	607.317	15.0916	99.394	603.637	3.24006
A300	GJ1	23702.7	285.905	25.8915	0.0248089	0.0340902	0.09794	0.439238	0.8097	0.901182	0.05999	0.786892	0.487402	602.319	2.54625	602.27	4.11447	602.084	17.6398	100.039	602.319	2.54625
A301	GJ1	24223.8	294.343	26.6252	0.0248899	0.011569	0.09786	0.401927	0.8089	0.969333	0.05998	0.882078	0.414642	601.831	2.33177	601.853	4.4204	601.936	19.6366	99.9825	601.831	2.33177
A360	GJ1	23282.2	290.585	26.2431	0.0252253	0.0186172	0.09766	0.364877	0.8117	1.00493	0.0603	0.936352	0.363086	600.706	2.11735	603.379	4.58991	613.437	20.7445	97.9245	600.706	2.11735
A361	GJ1	22718.6	283.751	25.8663	0.0248098	0.0207159	0.09864	0.519555	0.8131	0.897518	0.05981	0.731849	0.578879	606.434	3.02454	604.193	4.10752	595.796	16.5071	101.785	606.434	3.02454
A420	GJ1	22974	298.075	26.9825	0.0244939	0.0257197	0.09791	0.323481	0.8115	0.822358	0.06014	0.756064	0.393358	602.161	1.88737	603.298	3.76304	607.575	16.9832	99.1089	602.161	1.88737
A421	GJ1	22915.3	295.376	26.8231	0.0247043	0.00847062	0.09823	0.50705	0.821	0.842358	0.06064	0.672657	0.601941	604.005	2.94131	608.582	3.87823	625.657	15.2174	96.5394	604.005	2.94131
A480	GJ1	22098.6	289.593	26.4024	0.0249513	0.0188048	0.09857	0.435	0.8211	1.00686	0.06044	0.908046	0.432035	606.045	2.53697	608.676	4.62821	618.483	20.1336	97.989	606.045	2.53697
A481	GJ1	21870.1	291.834	26.5047	0.0242241	0.0256094	0.09824	0.574596	0.8123	0.921462	0.06	0.720369	0.62357	604.076	3.32905	603.741	4.2137	602.486	16.2531	100.264	604.076	3.32905
A540	GJ1	21888.5	295.614	26.7585	0.0249282	0.0261991	0.09797	0.499045	0.8027	0.932371	0.05945	0.787573	0.535243	602.501	2.88856	598.363	4.23515	582.713	17.7036	103.396	602.501	2.88856
A541	GJ1	22006.3	297.068	26.8199	0.0248986	0.0155816	0.09768	0.573535	0.8059	1.08794	0.05987	0.924484	0.527175	600.813	3.30583	600.167	4.94668	597.729	20.543	100.516	600.813	3.30583
A594	GJ1	21412.7	285.241	25.8178	0.0246563	0.0111166	0.09795	0.373582	0.8102	0.940901	0.06002	0.863558	0.397047	602.359	2.1724	602.554	4.29554	603.289	19.2432	99.8459	602.359	2.1724
A595	GJ1	21545.5	282.741	25.7126	0.0250048	0.00950009	0.09839	0.390775	0.8212	0.82741	0.06056	0.729317	0.472287	604.949	2.27955	608.711	3.8108	622.74	16.3923	97.1432	604.949	2.27955
		23564.3	290.003	26.2978	0.0248	0.0981205	0.0981	0.594024	0.812558	1.33295	0.0601004	1.01148	0.495195	603.264	3.42739	603.881	6.05761	606.168	21.9379	99.5506	603.264	3.42739
RM1
B003	BB	18670.2	186.622	16.9379	0.272967	0.0410668	0.09156	0.925641	0.7423	1.84424	0.05883	1.59512	0.501909	564.73	5.01406	563.768	7.98761	559.888	35.0677	100.865	564.73	5.01406
B042	BB	23274.2	226.167	20.665	0.285301	0.0281557	0.09184	0.873242	0.7407	1.61987	0.05852	1.36434	0.539083	566.435	4.74495	562.837	7.00953	548.318	30.1432	103.304	566.435	4.74495
B082	BB	23466.5	224.018	20.4268	0.299119	0.0388673	0.09129	0.859555	0.7342	1.73196	0.05836	1.50362	0.496289	563.136	4.64485	559.006	7.45494	542.229	33.1865	103.856	563.136	4.64485
B132	BB	23845.7	223.978	20.5077	0.304144	0.0295817	0.0916	0.893844	0.7423	1.61427	0.0588	1.34422	0.553713	564.979	4.8445	563.733	6.99373	558.709	29.6592	101.122	564.979	4.8445
B192	BB	23862.9	224.179	20.6482	0.300219	0.0307602	0.0922	1.00835	0.7446	1.65901	0.0586	1.31739	0.607805	568.524	5.49563	565.089	7.19989	551.287	29.1162	103.127	568.524	5.49563
B252	BB	23536.4	225.541	20.5992	0.306546	0.0139452	0.09124	0.903908	0.7448	1.7518	0.05923	1.50059	0.515987	562.881	4.88142	565.206	7.60268	574.576	32.947	97.9647	562.881	4.88142
B302	BB	21908.5	217.441	19.7577	0.291429	0.0102304	0.09116	0.8856	0.7436	1.60376	0.05919	1.33707	0.552203	562.387	4.77891	564.51	6.95548	573.077	29.4371	98.1346	562.387	4.77891
B362	BB	21161	214.806	19.638	0.29382	0.0208607	0.09171	0.974364	0.7506	1.70033	0.05938	1.39346	0.573044	565.654	5.28531	568.549	7.41247	580.148	30.6145	97.5017	565.654	5.28531
B422	BB	20945.3	221.99	20.1227	0.294195	0.0311435	0.09086	0.933879	0.7383	1.65122	0.05896	1.36177	0.565568	560.618	5.02326	561.401	7.13116	564.573	30.0089	99.2996	560.618	5.02326
B482	BB	20881.6	228.245	20.7966	0.308975	0.0326474	0.09104	0.908902	0.7362	1.80512	0.05867	1.5596	0.503513	561.69	4.89834	560.181	7.78127	554.057	34.3328	101.378	561.69	4.89834
B542	BB	20681.4	223.294	20.3367	0.297639	0.0584695	0.09104	0.928196	0.7495	1.73115	0.05973	1.46127	0.536174	561.688	5.00192	567.918	7.54019	592.941	32.0057	94.7292	561.688	5.00192
B596	BB	20211	217.22	19.936	0.298533	0.0157934	0.09199	0.970722	0.7529	1.67404	0.05939	1.36386	0.579867	567.292	5.28021	569.9	7.31112	580.319	29.978	97.7553	567.292	5.28021
		21870.4	219.459	20.0311	0.296074	0.0980889	0.0914608	0.919536	0.743333	1.52825	0.0589717	1.40511	0.543763	564.168	4.96688	564.342	6.60903	565.01	30.5839	99.9197	564.168	4.96688
RM2
C004	Monastery	37.6404	2.37719	0.0335829	0.214268	2.47742	0.01419	9.59128	0.06663	74.0706	0.03406	73.447	0.129488	90.8544	8.65312	65.4926	46.9794	-786.271	2077.64	-11.5551
C043	Monastery	34.1826	2.42616	0.0321233	0.215654	b.d.	0.01409	9.80762	0.115	47.9093	0.05922	46.8947	0.204712	90.192	8.78423	110.53	50.1738	574.397	1019.7	15.702
C083	Monastery	43.4154	2.61461	0.0331482	0.218538	0.0714774	0.01312	9.64499	0.1012	39.0142	0.05594	37.8032	0.247217	84.0429	8.05345	97.8617	36.3979	449.163	839.806	18.711
C133	Monastery	33.8217	2.32497	0.0313491	0.220524	0.733946	0.01406	9.64736	0.08645	53.0641	0.0446	52.1797	0.181806	90.0343	8.62569	84.1867	42.8711	-78.6951	1276.86	-114.409
C193	Monastery	65.1237	2.51258	0.0345797	0.213764	1.82049	0.01397	9.24028	0.1439	30.3919	0.07473	28.9532	0.304037	89.4563	8.20906	136.53	38.8256	1060.41	582.664	8.43601
C253	Monastery	50.1974	2.40041	0.0339921	0.221548	2.70455	0.01418	9.45403	0.09957	48.9718	0.05094	48.0506	0.19305	90.7842	8.52274	96.3834	45.0298	237.233	1108.33	38.2679
C303	Monastery	29.5833	2.65651	0.0343462	0.217	b.d.	0.01377	8.76848	0.08611	46.7698	0.04537	45.9405	0.187482	88.1788	7.67944	83.8768	37.6525	-36.9568	1115.2	-238.6
C363	Monastery	37.7151	2.45546	0.0335985	0.214111	b.d.	0.01473	9.50579	0.1275	39.7567	0.06276	38.6036	0.239099	94.2937	8.89826	121.81	45.6356	699.29	822.171	13.4842
C423	Monastery	34.4042	2.33283	0.0320466	0.218547	1.89625	0.01351	10.538	0.07005	55.9351	0.03763	54.9335	0.188397	86.4881	9.05338	68.7511	37.183	-512.223	1466.22	-16.8848
C483	Monastery	34.4531	2.26809	0.0293769	0.216072	b.d.	0.01337	10.4103	0.109	41.3766	0.05913	40.0456	0.251599	85.6169	8.85416	105.009	41.2778	570.92	871.283	14.9963
C543	Monastery	45.8798	2.49826	0.0339846	0.209355	0.0894114	0.01376	10.0526	0.1326	40.035	0.06993	38.7524	0.251094	88.104	8.79658	126.459	47.6021	925.499	796.083	9.51962
C597	Monastery	48.8711	2.26271	0.0360789	0.216043	3.45735	0.01537	9.96987	0.1032	34.6294	0.04869	33.1632	0.287902	98.3341	9.72953	99.6803	32.8786	131.997	779.839	74.4971
		41.274	2.42748	0.0331839	0.216285	0.0980889	0.01401	8.62093	0.103434	46.3098	0.0535833	46.1474	0.222157	89.6983	7.68523	99.7141	44.0669	269.564	1114.78	-15.6529
RM3
D005	91500	5913.25	24.1849	4.30109	0.284699	0.217908	0.1759	1.16376	1.803	2.74559	0.07439	2.48675	0.423866	1044.46	11.2353	1046.64	17.9474	1051.2	50.3588	99.3589	1051.2	50.3588
D044	91500	6229.52	25.0845	4.46206	0.286259	0.169709	0.1762	1.29079	1.775	3.20402	0.07309	2.93251	0.402865	1046.24	12.4784	1036.36	20.8214	1015.57	59.6193	103.02	1015.57	59.6193
D084	91500	6457.76	23.8751	4.30657	0.288049	0.196543	0.1778	1.17806	1.871	2.82392	0.07638	2.56646	0.417171	1054.89	11.4775	1071.04	18.702	1104.07	51.5569	95.5456	1104.07	51.5569
D134	91500	6075.73	23.01	4.09676	0.284476	0.106213	0.1766	1.19998	1.832	2.58096	0.07526	2.28503	0.464938	1048.29	11.6233	1056.88	16.967	1074.67	46.157	97.5455	1074.67	46.157
D194	91500	6202.78	22.8763	4.08265	0.290972	0.138743	0.1761	1.27482	1.893	2.72337	0.07798	2.40656	0.468106	1045.85	12.3201	1078.66	18.1092	1145.56	48.0882	91.2953	1145.56	48.0882
D254	91500	5586.89	22.3404	3.99225	0.287071	0.248023	0.1769	1.26951	1.749	3.05336	0.07174	2.77693	0.415777	1049.98	12.3136	1026.8	19.7377	977.723	56.8002	107.391
D304	91500	5538.28	22.7756	4.0742	0.291159	0.133432	0.1777	1.23333	1.768	2.90324	0.07217	2.62825	0.424813	1054.63	12.0122	1033.73	18.8416	989.763	53.6853	106.554
D364	91500	5512.43	22.8945	4.06598	0.290334	0.198556	0.1754	1.27293	1.807	2.78213	0.07476	2.47385	0.457538	1041.96	12.2597	1048.16	18.2011	1061.12	50.027	98.1937	1061.12	50.027
D424	91500	5433.56	23.5349	4.19604	0.288547	0.112094	0.1769	1.35815	1.801	3.32871	0.07388	3.03903	0.40801	1049.93	13.1709	1045.8	21.7437	1037.17	61.5715	101.23	1037.17	61.5715
D484	91500	5380.8	23.5846	4.19091	0.290303	0.141444	0.1762	1.25149	1.809	3.24489	0.07453	2.99384	0.38568	1045.96	12.0963	1048.88	21.2325	1054.95	60.502	99.1478	1054.95	60.502
D544	91500	5654.56	24.8313	4.37444	0.277806	0.313352	0.1739	1.33701	1.809	2.97156	0.07547	2.65378	0.449937	1033.7	12.7815	1048.73	19.4445	1080.19	53.4808	95.6962	1080.19	53.4808
D598	91500	5063.25	22.4895	4.04801	0.291678	0.211713	0.1775	1.24014	1.772	3.0821	0.07243	2.82159	0.40237	1053.5	12.0664	1035.3	20.0183	997.05	57.5395	105.662
		5754.07	23.4568	4.18258	0.287613	0.0980889	0.176425	1.23534	1.80742	4.63612	0.07434	4.91012	0.426756	1047.45	11.9289	1048.08	30.1957	1049.09	98.5738	100.053	1049.09	98.5738
Sequence 3 (09.2021)
grain	sample	207Pba	Ub	Pbb	Thb	206Pbcc	206Pbd	±2s	207Pbd	±2s	207Pbd	±2s	rhoe	206Pb	±2s	207Pb	±2s	207Pb	±2s	concf	Preferred age	±2s
		(cps)	(ppm)	(ppm)	U	(%)	238U	(%)	235U	(%)	206Pb	(%)		238U	(Ma)	235U	(Ma)	206Pb	(Ma)	(%)	(Ma)	(Ma)
Sample Kar 7 (Karish North 1 borehole, Middle-Late Miocene)
U114		7410.61	38.4775	7.33	0.820338	1.09323	0.162034	1.60289	1.45718	4.06891	0.0652531	3.73989	0.393936	968.069	14.4175	912.844	24.5089	781.564	78.7365	123.863
U115		27174.2	139.278	26.0219	0.452241	0.0323319	0.179048	1.39159	1.7774	2.08136	0.0720295	1.54775	0.668598	1061.77	13.6347	1037.23	13.543	985.859	31.8824	107.7
U116		7780.91	75.87	8.34022	0.351487	0.395116	0.107861	1.58199	0.872707	3.15955	0.0587079	2.73497	0.500701	660.316	9.93519	637.036	14.9567	555.299	59.8358	118.912
U117		2035.09	17.2488	1.83807	0.324601	1.50542	0.102863	2.11981	0.863163	5.88661	0.0608873	5.49168	0.360107	631.167	12.7499	631.848	27.6942	634.287	118.311	99.508	631.167	12.7499
U118		16948.6	98.5845	16.321	0.465955	0.102541	0.157213	1.37047	1.51463	2.23992	0.0699057	1.77174	0.611837	941.271	12.0128	936.312	13.714	924.662	36.7245	101.796	941.271	12.0128
U119		20078.3	99.4566	17.4442	0.610409	0.287635	0.155643	1.54806	1.50442	2.35435	0.0701347	1.77382	0.657534	932.518	13.4497	932.179	14.3742	931.377	36.7302	100.122	932.518	13.4497
U120		15046.7	76.2273	12.6859	0.530997	0.248262	0.154516	1.52411	1.67298	2.59933	0.0785617	2.10561	0.586347	926.23	13.1588	998.319	16.5331	1160.22	42.0586	79.8321
U121		6865.67	41.6703	6.49743	0.575188	0.6696	0.141841	1.61135	1.3153	3.31933	0.0672849	2.90198	0.485446	855.065	12.9115	852.455	19.1557	845.67	60.5548	101.111	855.065	12.9115
U122		36705.7	59.0826	22.7276	0.803676	0.379625	0.324736	1.61635	5.48796	2.42889	0.122624	1.81299	0.665468	1812.81	25.5604	1898.71	20.9012	1993.95	32.7728	90.9157	1993.95	32.7728
U123		31428.7	244.906	32.8844	0.733475	0.0904081	0.117708	1.44266	1.0397	2.13389	0.0640907	1.57233	0.676069	717.36	9.8015	723.768	11.0554	743.674	33.5772	96.4616	717.36	9.8015
U124		5920.09	58.8989	8.02381	1.44627	0.981959	0.102054	1.63628	0.776661	4.65561	0.0552197	4.35859	0.351464	626.437	9.77372	583.577	20.6687	420.125	97.4176	149.107
U125		4669.11	48.9164	6.14393	1.01316	0.138184	0.105772	1.59339	0.868301	3.28815	0.0595651	2.87629	0.484586	648.149	9.83145	634.645	15.5229	586.839	62.5797	110	648.149	9.83145
U126		158770	239.005	86.9196	0.235993	0.0469548	0.351385	1.34213	6.07096	1.79628	0.125363	1.19387	0.747171	1941.21	22.5206	1986.09	15.7178	2033.13	21.9602	95.4786	2033.13	21.9602
U127		31271.9	55.9449	19.6991	0.45252	0.114315	0.326355	1.4371	5.08255	2.11995	0.113002	1.5585	0.677895	1820.69	22.8156	1833.2	18.0298	1847.43	28.7782	98.5526	1847.43	28.7782
U128		262745	228.699	112.369	0.322319	0.0939811	0.451011	1.4762	10.024	1.88174	0.161268	1.16696	0.784485	2399.75	29.6065	2436.99	17.4525	2468.24	20.7489	97.2252	2468.24	20.7489
U129		16611.6	183.623	22.7711	1.25099	0.0675715	0.0984364	1.43862	0.800929	2.29833	0.0590381	1.7924	0.625942	605.239	8.31716	597.352	10.3866	567.523	39.2859	106.646	605.239	8.31716
U135		7324.75	82.759	8.48844	0.50906	0.137856	0.0972272	1.45033	0.784625	3.08704	0.0585556	2.72513	0.469812	598.139	8.29085	588.118	13.787	549.631	59.6785	108.826	598.139	8.29085
U136		28268.5	24.9533	11.6585	0.15278	0.037515	0.448399	1.51985	9.93659	2.25856	0.160793	1.67068	0.672926	2388.13	30.3584	2428.91	20.9015	2463.25	28.9627	96.9503	2463.25	28.9627
U137		47118.2	545.514	48.0688	0.186564	0.0256759	0.0907715	1.33242	0.742185	1.90758	0.0593275	1.3651	0.698489	560.098	7.15414	563.68	8.26034	578.16	30.0151	96.8761	560.098	7.15414
U138		19049.7	121.922	18.1928	0.535066	0.0142867	0.140045	1.41111	1.33325	2.23525	0.0690777	1.73353	0.631298	844.917	11.1835	860.295	12.9822	900.133	36.0787	93.8658	844.917	11.1835
U139		100757	133.893	57.8748	0.572764	0.0319151	0.385474	1.45326	6.75985	1.91154	0.127244	1.24178	0.760258	2101.8	26.0893	2080.48	16.9672	2059.44	22.7212	102.057	2059.44	22.7212
U140		22707.4	115.954	20.1028	0.270359	0.0693677	0.172832	1.45467	1.72972	2.25899	0.072618	1.72828	0.643949	1027.7	13.8298	1019.65	14.5511	1002.4	35.4314	102.524	1002.4	35.4314
U141		45383.4	241.844	28.856	0.664299	1.88036	0.102357	1.65191	1.3794	5.37852	0.097784	5.11857	0.307131	628.205	9.8935	880.183	31.666	1581.45	95.898	39.7235
U142		9366.3	100.003	11.9331	0.927973	0.102503	0.102101	1.48229	0.849782	2.52217	0.0603911	2.04063	0.587704	626.708	8.85872	624.529	11.7727	616.644	44.2986	101.632	626.708	8.85872
U143		95332.8	420.741	72.1153	0.127093	1.58652	0.169119	1.78442	2.79567	2.29152	0.119947	1.43768	0.778704	1007.25	16.6485	1354.38	17.1624	1954.62	26.3448	51.5319
U144		10717	45.3353	7.75376	0.507701	3.66113	0.149384	1.64628	1.43601	4.39905	0.0697508	4.07939	0.374236	897.507	13.8014	904.058	26.3382	920.1	84.0118	97.5445	897.507	13.8014
U145		35706.8	270.544	35.6675	0.272074	0.0109179	0.13267	1.36588	1.19173	1.97699	0.0651778	1.42929	0.690888	803.077	10.3223	796.761	10.9285	779.137	30.4198	103.073	803.077	10.3223
U146		5655.23	58.1793	7.88096	1.43143	0.584052	0.104061	1.59345	0.860996	4.19896	0.0600354	3.88486	0.379487	638.164	9.68771	630.667	19.7301	603.876	84.1814	105.678	638.164	9.68771
U147		6504.01	41.8904	6.51129	0.578913	0.189643	0.142992	1.55474	1.37288	3.0693	0.0696648	2.64639	0.506545	861.56	12.5469	877.396	18.0411	917.565	54.647	93.8964	861.56	12.5469
U148		23877.1	131.482	29.5581	1.53657	0.603831	0.167653	1.47124	1.57209	3.03874	0.0680394	2.65884	0.48416	999.165	13.628	959.25	18.8701	868.821	55.3153	115.002
U149		28485.7	234.103	30.4323	0.451774	0.0626814	0.124465	1.40357	1.09651	2.10352	0.0639233	1.56678	0.667248	756.212	10.0232	751.661	11.1827	738.143	33.4898	102.448	756.212	10.0232
U150		17239.2	110.428	19.4913	1.12551	0.631142	0.14102	1.57926	1.27731	3.01966	0.0657218	2.57376	0.522994	850.426	12.5905	835.654	17.2067	796.586	54.1664	106.759	850.426	12.5905
U151		11125.9	63.0774	11.7041	0.801608	0.129968	0.161583	1.47801	1.56986	2.67728	0.070495	2.23233	0.552057	965.568	13.2639	958.369	16.6192	941.885	46.0011	102.514	965.568	13.2639
U152		21305.7	187.561	30.2553	1.75564	0.295636	0.113144	1.48104	0.966031	2.37953	0.0619518	1.86244	0.622409	690.981	9.71136	686.416	11.8811	671.482	40.1173	102.904	690.981	9.71136
U153		87230.4	320.595	63.3022	0.183447	b.d.	0.202697	1.5257	2.45879	2.02115	0.0880173	1.32564	0.754865	1189.79	16.5881	1260.01	14.6142	1382	26.0144	86.0922
U154		11477.1	145.656	13.6668	0.348111	0.0648091	0.0936263	1.48543	0.729044	2.72714	0.0565002	2.28709	0.544684	576.948	8.20363	555.992	11.6819	471.084	50.8141	122.472
U155		20344	191.498	26.6454	0.28168	0.17639	0.142087	1.68499	1.24339	2.42015	0.063496	1.73722	0.696234	856.452	13.5213	820.416	13.6313	723.932	37.1474	118.306
U156		14536.5	96.8497	14.2486	0.598263	b.d.	0.140671	1.67601	1.34387	2.51145	0.0693185	1.87039	0.667349	848.454	13.3318	864.909	14.6329	907.307	38.8355	93.5134	848.454	13.3318
U157		15055.5	111.403	15.7855	0.506353	0.12576	0.133008	1.49882	1.19255	2.40774	0.0650569	1.88435	0.6225	805.003	11.3508	797.142	13.3084	775.23	39.9218	103.841	805.003	11.3508
U158		83884.8	68.303	34.8049	0.672196	0.00891216	0.427533	1.52719	9.84847	1.99734	0.167145	1.28727	0.764612	2294.59	29.5101	2420.7	18.4846	2528.5	22.5834	90.7489	2528.5	22.5834
U159		160456	129.32	71.0287	0.669075	0.0956901	0.461419	1.29426	11.1238	1.78224	0.174925	1.22527	0.726197	2445.82	26.3752	2533.55	16.6931	2604.58	21.4732	93.9044	2604.58	21.4732
U160		17041.2	96.3734	17.3151	0.716148	0.0864639	0.159417	1.51356	1.56277	2.45557	0.0711303	1.93364	0.616379	953.538	13.4254	955.567	15.2182	960.242	39.8114	99.3018	953.538	13.4254
U161		3220.34	36.1558	3.90893	0.693995	0.300891	0.0976861	1.70227	0.788312	4.10756	0.0585544	3.73822	0.414424	600.834	9.77094	590.214	18.3896	549.587	81.7534	109.325	600.834	9.77094
U162		5809.43	59.6116	6.96904	0.735176	0.194094	0.103791	1.53943	0.851978	3.36222	0.0595609	2.9891	0.45786	636.59	9.33773	625.734	15.7112	586.683	65.023	108.507	636.59	9.33773
U163		28740.9	181.379	26.5146	0.34593	0.0010452	0.144448	1.57007	1.34278	2.13071	0.0674506	1.44042	0.736877	869.768	12.7832	864.434	12.4141	850.783	30.3208	102.231	869.768	12.7832
U164		12157.7	130.323	13.3783	0.282035	0.0770496	0.103207	1.38878	0.852781	2.42788	0.0599545	1.99146	0.572013	633.176	8.38224	626.174	11.3547	600.959	43.3538	105.361	633.176	8.38224
U165		7949.49	55.4627	8.20363	0.443892	0.146951	0.141588	1.55791	1.29677	2.81946	0.0664554	2.34995	0.552557	853.635	12.4644	844.294	16.1739	819.812	49.3145	104.126	853.635	12.4644
U166		73903.1	114.483	44.0125	0.552713	0.0429754	0.344228	1.42563	5.78708	1.95025	0.121985	1.3308	0.731003	1906.98	23.5563	1944.48	16.9365	1984.66	24.4155	96.0859	1984.66	24.4155
U167		96719.3	137.645	60.3507	0.807481	0.191775	0.370942	1.4259	6.51204	1.93734	0.127381	1.31152	0.736009	2033.83	24.8949	2047.53	17.1095	2061.35	23.9056	98.6653	2061.35	23.9056
U168		14568.9	153.353	15.1941	0.223256	0.041643	0.101136	1.48533	0.846955	2.37309	0.0607646	1.85076	0.625908	621.06	8.80065	622.977	11.0577	629.944	40.137	98.5897	621.06	8.80065
U169		3937.61	30.4255	5.01802	1.36292	0.333152	0.127038	1.68518	1.12986	4.2175	0.0645336	3.86619	0.399569	770.944	12.252	767.687	22.7234	758.219	81.6906	101.678	770.944	12.252
U170		100735	152.665	64.9804	0.978057	0.650723	0.33722	1.73575	5.24181	2.43411	0.112788	1.70648	0.713094	1873.28	28.2351	1859.44	20.7944	1844	31.4168	101.588	1844	31.4168
U171		10106.8	58.0034	9.1916	0.243662	0.097516	0.159175	1.51144	1.52447	2.63342	0.0694922	2.15649	0.573946	952.192	13.3891	940.274	16.1599	912.459	44.6543	104.354	952.192	13.3891
U172		14584.6	82.8595	14.5436	0.45607	0.147769	0.167104	1.47474	1.62043	2.33262	0.0703618	1.80728	0.632224	996.136	13.6221	978.158	14.6615	938.009	37.3739	106.197	996.136	13.6221
U173		9236.13	82.2589	10.2694	0.393635	0.0971067	0.121951	1.4201	1.06954	2.67613	0.0636366	2.26825	0.530654	741.78	9.95845	738.515	14.052	728.623	48.3061	101.806	741.78	9.95845
U174		7001.23	48.2706	6.64013	0.31329	0.366343	0.134822	1.6148	1.24522	3.2852	0.0670162	2.86094	0.491537	815.314	12.3748	821.245	18.5087	837.34	59.7816	97.3696	815.314	12.3748
U175		7685.28	93.0495	9.00355	0.362448	0.137729	0.0958645	1.59109	0.732554	3.17577	0.0554467	2.74844	0.501011	590.128	8.97807	558.051	13.6395	429.279	61.4297	137.469
U176		10300.9	112.912	11.0509	0.182923	0.0796852	0.101168	1.44024	0.855429	2.63158	0.0613529	2.20247	0.547293	621.25	8.53636	627.624	12.3267	650.664	47.5109	95.4793	621.25	8.53636
U177		12851.2	97.5074	13.3691	0.2938	0.143111	0.136712	1.43561	1.21776	2.46627	0.0646323	2.00537	0.582099	826.043	11.1392	808.751	13.7615	761.44	42.5428	108.484	826.043	11.1392
U178		6393.63	61.9009	7.92847	1.0448	0.176305	0.104653	1.59761	0.886167	3.34721	0.0614409	2.94134	0.477297	641.62	9.76304	644.308	15.9739	653.74	63.2847	98.1461	641.62	9.76304
U179		3995.77	45.4714	4.65933	0.428322	0.154879	0.0994597	1.70914	0.829326	3.52007	0.0605023	3.07729	0.485542	611.242	9.97236	613.238	16.2091	620.617	66.5563	98.4894	611.242	9.97236
U180		6406.84	31.5127	7.58655	1.46476	0.21937	0.181092	1.76916	1.84032	3.02214	0.0737373	2.45019	0.585398	1072.94	17.4958	1059.98	19.8956	1033.38	49.7563	103.828	1033.38	49.7563
U181		3931.23	40.4916	4.80484	1.07787	0.850607	0.0955129	1.68995	0.792848	5.5284	0.0602312	5.26377	0.305685	588.059	9.50329	592.786	24.8275	610.92	113.85	96.2579	588.059	9.50329
U182		14949.3	126.98	16.9152	0.773518	0.0570723	0.116876	1.55799	1.04084	2.40311	0.0646178	1.82965	0.648321	712.56	10.5169	724.336	12.4543	760.967	38.8661	93.6387	712.56	10.5169
U183		2202.4	15.9097	2.21937	0.201736	0.685978	0.14283	2.11745	1.1138	7.3471	0.0565825	7.03536	0.288202	860.648	17.0659	760.003	39.3122	474.302	155.677	181.456
U184		7909.42	90.015	9.21745	0.381515	0.0575691	0.100707	1.48389	0.82056	2.81213	0.0591213	2.38876	0.527675	618.552	8.7583	608.361	12.8764	570.586	52.1755	108.406	618.552	8.7583
U185		3824.37	51.9266	4.91826	0.586353	0.192869	0.0888902	1.69283	0.68341	3.87246	0.0557855	3.48285	0.437145	548.97	8.91325	528.834	15.9668	442.843	77.5849	123.965
U186		12989.5	88.2522	13.0369	0.496199	0.666027	0.137126	1.45258	1.25537	2.89017	0.0664274	2.49862	0.502591	828.39	11.3006	825.826	16.3442	818.931	52.4133	101.155	828.39	11.3006
U187		2242.41	16.6555	2.13417	0.134393	0.438028	0.13269	1.90621	1.17708	4.88825	0.0643665	4.50127	0.389958	803.196	14.4016	789.952	26.8412	752.747	95.1514	106.702	803.196	14.4016
U188		9628.91	58.5513	12.0382	1.17936	0.335621	0.167201	1.68338	1.54745	2.86481	0.0671538	2.31805	0.587607	996.671	15.5543	949.476	17.6818	841.612	48.4867	118.424
U189		181985	249.542	110.966	0.987557	0.707635	0.351546	1.39335	6.01661	2.04732	0.124183	1.50003	0.680573	1941.98	23.3862	1978.25	17.8761	2016.39	27.2585	96.3098	2016.39	27.2585
U195		10706.4	119.046	13.3472	0.75529	0.278625	0.0988147	1.38982	0.78764	3.0074	0.0578363	2.66699	0.462134	607.459	8.06356	589.832	13.4605	522.579	58.6788	116.243
Sample Kar 13 (Karish Main 2 borehole, Early Miocene)
U196		24846.7	122.829	23.1199	0.33339	0.180985	0.183881	1.44436	1.84553	2.12136	0.0728247	1.5537	0.680867	1088.14	14.4736	1061.84	13.9889	1008.17	31.8991	107.933	1008.17	31.8991
U197		8889.34	82.7433	7.94221	0.127224	1.67286	0.0975122	1.56167	0.808998	3.23401	0.0601981	2.83197	0.482888	599.813	8.95026	601.892	14.6909	609.729	61.3872	98.3737	599.813	8.95026
U198		5173.95	29.2886	4.49036	0.73202	0.37612	0.134914	1.66905	1.51839	3.55051	0.0816621	3.13375	0.470088	815.839	12.7978	937.829	21.7454	1236.54	61.6687	65.9775
U199		19685.5	253.115	26.2289	0.88349	0.112535	0.0890291	1.40165	0.71584	2.36153	0.0583416	1.90058	0.593534	549.792	7.39254	548.208	10.0107	541.63	41.8045	101.507	549.792	7.39254
U200		16346.6	193.731	17.0041	0.36081	b.d.	0.0899535	1.43507	0.75059	2.35459	0.0605451	1.86673	0.609479	555.262	7.64066	568.567	10.2582	622.142	40.5299	89.2501
U201		3024.15	42.4213	5.04905	1.71452	0.430794	0.0868304	1.89177	0.653997	4.77658	0.054651	4.38599	0.396051	536.765	9.74733	510.935	19.1805	396.963	98.4251	135.218
U202		19575.7	51.7822	10.1521	0.680863	7.83552	0.143129	1.77887	1.39412	4.36674	0.0706751	3.98799	0.407369	862.334	14.3655	886.447	25.8262	947.109	81.7955	91.0491	862.334	14.3655
U203		43664.7	363.7	53.8903	0.85793	0.0404035	0.128414	1.35018	1.13336	1.99628	0.0640394	1.47042	0.676348	778.813	9.91375	769.352	10.7812	741.98	31.4535	104.964	778.813	9.91375
U204		20909.1	135.466	21.9644	0.599927	0.0738291	0.148589	1.43561	1.37943	2.23287	0.0673609	1.71019	0.642944	893.048	11.9818	880.196	13.1574	848.016	35.8831	105.31	893.048	11.9818
U205		27116.3	269.147	30.2441	0.306909	0.0315234	0.11224	1.37173	0.956978	2.08536	0.0618655	1.57069	0.65779	685.744	8.93103	681.73	10.3648	668.5	33.9413	102.579	685.744	8.93103
U206		2311.04	27.352	3.29785	1.32604	0.924274	0.0921869	1.96872	0.666003	5.90238	0.0524205	5.56437	0.333546	568.458	10.7164	518.279	23.961	302.77	126.916	187.752
U207		92805.8	83.0136	45.8394	0.570672	0.0838425	0.481127	1.46458	10.8912	1.95284	0.164252	1.29173	0.749977	2532.17	30.6989	2513.89	18.2415	2499.15	22.7055	101.321	2499.15	22.7055
U208		54745.2	300.859	44.3679	0.288916	0.0147515	0.145217	1.62207	1.47388	2.18955	0.0736444	1.47072	0.740824	874.096	13.2675	919.723	13.2603	1030.83	30.1398	84.7953
U209		15165.7	151.08	15.4882	0.366277	0.0306213	0.100422	1.62529	0.892626	2.5952	0.0644966	2.02324	0.626267	616.879	9.56698	647.779	12.4359	757.009	42.9472	81.4889
U210		61380.1	53.8811	29.7796	0.925984	1.2245	0.430718	1.53182	9.79661	2.20408	0.165035	1.58477	0.694992	2308.95	29.7535	2415.83	20.3733	2507.16	27.4484	92.0946	2507.16	27.4484
U211		114274	66.3611	41.7946	0.375288	0.0149272	0.552632	1.42912	16.1487	1.88122	0.21203	1.22337	0.759674	2836.11	32.826	2885.64	18.0945	2920.4	21.017	97.1138	2920.4	21.017
U212		31093.9	169.542	35.156	0.969982	0.063342	0.174351	1.44782	1.74257	2.14221	0.0725204	1.57889	0.675853	1036.04	13.8678	1024.42	13.8381	999.668	32.4437	103.638
U213		7679.52	57.3095	7.66141	0.173155	0.464363	0.136811	1.70307	1.22369	3.08538	0.0649	2.57276	0.55198	826.605	13.2198	811.463	17.2488	770.149	54.3722	107.331	826.605	13.2198
U214		16681.1	132.433	17.6383	0.36895	0.251044	0.129526	1.41873	1.16674	2.36321	0.0653599	1.88997	0.600339	785.163	10.4961	785.121	12.9322	784.999	39.9783	100.021	785.163	10.4961
U215		16139.4	95.4091	16.4894	0.409136	0.0643836	0.167106	1.41583	1.64656	2.26938	0.0714958	1.77356	0.623884	996.145	13.0789	988.233	14.3519	970.706	36.5113	102.621	996.145	13.0789
U216		26202.7	439.298	28.8218	0.223572	0.00169891	0.0682508	1.48322	0.626205	2.31616	0.0665737	1.77894	0.640379	425.609	6.11307	493.729	9.06227	823.526	37.4405	51.6813
U217		82246.6	132.142	49.6125	0.324074	0.0214645	0.357206	1.41094	5.96879	1.90985	0.121245	1.28715	0.738773	1968.91	23.9618	1971.31	16.6635	1973.82	23.6878	99.7515	1973.82	23.6878
U218		162144	153.424	77.987	0.478103	0.0290447	0.45192	1.40682	10.004	1.8522	0.160623	1.20478	0.759541	2403.78	28.2571	2435.15	17.1779	2461.47	21.3673	97.6566	2461.47	21.3673
U219		41255.2	37.962	24.0073	1.35502	0.0918697	0.473132	1.46513	10.5852	2.10945	0.162334	1.51762	0.694555	2497.28	30.3638	2487.41	19.6432	2479.36	26.4134	100.723	2479.36	26.4134
U220		43599.4	237.855	49.5405	1.09929	0.207703	0.167757	1.3987	1.656	2.07109	0.0716265	1.52743	0.675346	999.739	12.9641	991.846	13.1291	974.429	31.5261	102.597	999.739	12.9641
U221		9707.93	84.0453	11.5504	0.682521	0.0975004	0.123837	1.48823	1.06553	2.66644	0.0624321	2.21248	0.558133	752.613	10.5791	736.546	13.9757	687.985	47.4374	109.394	752.613	10.5791
U222		74450.9	59.6053	46.3743	2.22201	0.0991042	0.498412	1.37747	11.9911	1.89188	0.174567	1.29684	0.728093	2606.97	29.5692	2603.71	17.8193	2601.17	22.6155	100.223	2601.17	22.6155
U223		64222.6	367.356	47.3405	0.0301192	0.152657	0.135545	1.79542	1.59716	2.32982	0.0854982	1.48476	0.770628	819.422	13.8224	969.099	14.5628	1325.99	29.2235	61.7969
U224		58867.1	51.1151	32.9153	1.3007	0.0929106	0.483425	1.39375	11.0626	1.93842	0.166044	1.34719	0.719015	2542.17	29.3113	2528.41	18.1324	2517.4	23.5678	100.984	2517.4	23.5678
U225		34508.3	32.2173	19.428	1.05759	0.0818406	0.480777	1.45127	10.623	2.0966	0.160324	1.51312	0.692201	2530.65	30.4054	2490.72	19.5305	2458.32	26.3861	102.942	2458.32	26.3861
U226		11245.8	94.0873	11.6134	0.738647	0.0321706	0.109653	1.82924	1.01954	2.76905	0.0674649	2.07882	0.660603	670.734	11.6582	713.683	14.2026	851.223	43.47	78.7965
U227		149642	133.412	74.6343	0.69864	0.107595	0.471796	1.38983	10.5579	1.87467	0.162373	1.25808	0.741372	2491.43	28.751	2485.01	17.47	2479.77	22.196	100.47	2479.77	22.196
U228		24484.1	299.303	26.709	0.0262687	0.0694329	0.0965072	1.36429	0.775177	2.13372	0.0582821	1.64057	0.639395	593.907	7.74709	582.729	9.46908	539.401	36.1716	110	593.907	7.74709
U229		32284.8	24.4464	14.0049	0.333224	0.0922332	0.519122	1.515	12.9339	2.14661	0.180781	1.52076	0.705765	2695.46	33.4052	2674.85	20.3137	2659.31	26.0874	101.359	2659.31	26.0874
U230		23237	283.577	29.7108	0.634089	0.0107919	0.0965458	1.41959	0.786141	2.10054	0.0590828	1.54824	0.675819	594.134	8.06351	588.98	9.39595	569.17	34.0033	104.386	594.134	8.06351
U231		9002.62	73.585	9.08425	0.282346	0.0102886	0.125595	1.52812	1.14166	2.73842	0.0659569	2.2724	0.558028	762.687	10.9993	773.299	14.8317	804.067	47.8201	94.8536	762.687	10.9993
U232		5149.17	40.9341	5.76512	0.4677	0.33722	0.134452	1.70385	1.1543	4.02562	0.062294	3.64726	0.423251	813.213	13.0248	779.273	21.908	683.258	78.0213	119.02
U233		24856.3	272.296	26.5975	0.177951	b.d.	0.105699	1.49252	0.880258	2.20102	0.0604276	1.61767	0.678104	647.718	9.20405	641.122	10.4718	617.949	35.2216	104.817	647.718	9.20405
U234		18863.7	119.504	19.3113	0.504637	0.0710716	0.15089	1.54795	1.44043	2.25683	0.0692668	1.64228	0.685899	905.95	13.0918	905.897	13.5395	905.77	34.1861	100.02	905.95	13.0918
U235		90860.6	230.455	46.6504	0.112415	0.00464271	0.203804	2.31668	3.00446	2.61254	0.106966	1.20763	0.886753	1195.72	25.2918	1408.75	19.9259	1747.53	22.8314	68.4235
U236		38011.2	237.933	37.4611	0.164507	0.058754	0.162551	1.48653	1.5356	2.11825	0.0685458	1.50905	0.701771	970.939	13.409	944.742	13.0417	884.173	31.572	109.813	970.939	13.409
U237		31468.6	331.375	34.1894	0.157403	0.0241752	0.107277	1.38703	0.909557	2.00993	0.0615199	1.45463	0.690092	656.917	8.6699	656.822	9.73117	656.498	31.5418	100.064	656.917	8.6699
U238		151183	134.083	64.8013	0.677932	0.416958	0.394457	1.7175	9.29319	2.19197	0.170946	1.36196	0.783541	2143.47	31.3401	2367.35	20.159	2566.17	23.7172	83.5278
U239		8410.14	71.6719	8.57263	0.372915	0.42119	0.114984	1.57957	1.02585	3.03609	0.064735	2.59283	0.520265	701.629	10.5076	716.849	15.6182	764.786	54.8398	91.7418	701.629	10.5076
U240		12327.1	74.9563	12.4873	0.394139	0.0633348	0.161375	1.47949	1.56809	2.55118	0.0705062	2.07837	0.579924	964.414	13.2624	957.669	15.8307	942.209	42.8634	102.357	964.414	13.2624
U241		11290.4	138.585	13.8815	0.581502	0.175406	0.0923258	1.43865	0.764531	2.67538	0.0600851	2.25564	0.537738	569.277	7.84462	576.621	11.7766	605.666	49.0063	93.992	569.277	7.84462
U242		10990.9	82.5775	12.7962	0.637007	0.206746	0.141346	1.54934	1.30799	2.71698	0.067145	2.23193	0.570243	852.27	12.3773	849.242	15.6452	841.337	46.7053	101.3	852.27	12.3773
U243		4126.75	57.6169	6.45167	1.46688	0.116554	0.0853514	1.58078	0.677576	3.41363	0.0576025	3.02556	0.463079	527.986	8.01862	525.308	14.0044	513.688	66.6238	102.783	527.986	8.01862
U244		6464.97	40.1547	7.18471	0.751931	0.225909	0.158344	1.58788	1.5487	3.19031	0.0709674	2.76708	0.497718	947.57	14.0018	949.976	19.6945	955.555	56.7903	99.1643	947.57	14.0018
U245		13207.1	146.989	12.4293	0.526562	b.d.	0.0827984	1.5384	0.797628	2.49953	0.0698992	1.97002	0.615474	512.804	7.5883	595.49	11.2686	924.471	40.767	55.4701
U246		16806.2	215.496	18.9389	0.0132626	0.0188597	0.0955177	1.42142	0.778587	2.21547	0.0591449	1.69937	0.641589	588.087	7.99543	584.677	9.85556	571.456	37.2513	102.91	588.087	7.99543
U247		41623.7	467.362	39.0949	0.0737561	b.d.	0.0898721	1.51759	0.735742	2.4456	0.0594012	1.91777	0.620541	554.78	8.07265	559.918	10.5327	580.853	41.9059	95.5113	554.78	8.07265
U248		5284.45	44.0818	7.10551	1.23004	1.66369	0.12463	1.64281	0.900209	5.50477	0.05241	5.25392	0.298433	757.158	11.7429	651.839	26.4833	302.315	119.853	250.454
U249		9745.32	81.1323	12.1724	1.18937	0.0079115	0.119626	1.52985	1.09167	2.58552	0.0662151	2.08435	0.591697	728.412	10.5443	749.313	13.7112	812.243	43.8478	90	728.412	10.5443
U255		78886.4	76.1767	34.5474	0.352857	0.00104843	0.414524	1.47247	9.31243	1.95749	0.163007	1.28981	0.752221	2235.57	27.8422	2369.24	18.0208	2486.34	22.6968	90	2486.34	22.6968
U256		13304	95.4637	12.5474	0.250583	1.05838	0.129173	1.52599	1.18741	2.9655	0.0666995	2.54274	0.514582	783.145	11.2611	794.757	16.3544	827.466	53.26	94.6437	783.145	11.2611
U257		6322.63	50.1848	7.02908	0.334951	0.125734	0.138535	1.58144	1.25094	3.02506	0.0655199	2.57877	0.522779	836.372	12.4127	823.831	17.0793	790.13	54.3262	105.852	836.372	12.4127
U258		142388	119.853	68.6861	0.700095	0.0588651	0.480877	1.37218	11.7257	1.82651	0.176928	1.2055	0.751262	2531.09	28.756	2582.75	17.1787	2623.54	21.1328	96.476	2623.54	21.1328
U259		25692.6	281.792	22.2003	0.29346	0.0839657	0.0770214	2.36377	0.643192	3.02207	0.0605931	1.88295	0.782169	478.319	10.9001	504.281	12.0161	623.851	40.8663	76.672
U260		28417.3	250.427	31.7157	0.379086	0.09108	0.122916	1.48593	1.06779	2.17599	0.0630336	1.58964	0.682874	747.327	10.4929	737.657	11.4205	708.407	34.1274	105.494	747.327	10.4929
U261		100435	202.175	65.0934	0.177301	0.00937071	0.319899	1.4022	4.95986	1.8481	0.112499	1.20387	0.758724	1789.24	21.9287	1812.51	15.6652	1839.37	22.5501	97.2746	1839.37	22.5501
U262		6254.83	92.0612	8.31125	0.697815	0.346046	0.0815436	1.61565	0.645699	3.99639	0.0574558	3.65525	0.404278	505.33	7.85723	505.828	15.925	508.084	80.5079	99.4579	505.33	7.85723
U263		11962.5	133.724	13.5215	0.144585	0.0470633	0.105636	1.41519	0.883104	2.40739	0.0606591	1.94751	0.587849	647.351	8.72312	642.658	11.4718	626.198	42.2338	103.378	647.351	8.72312
U264		43405.2	217.312	42.679	0.404972	0.0413131	0.188866	1.37319	1.93683	1.97141	0.0744101	1.4145	0.696552	1115.23	14.0754	1093.9	13.2223	1051.71	28.9342	106.04	1051.71	28.9342
U265		140125	233.641	71.021	0.294163	0.482449	0.281711	1.68575	4.61364	2.20774	0.118832	1.42562	0.763562	1599.98	23.9003	1751.74	18.4622	1937.93	26.1795	82.561
U266		47825.6	81.4346	35.1547	0.86153	0.0947725	0.369478	1.41939	6.68357	2.1966	0.131254	1.67642	0.646178	2026.94	24.71	2070.45	19.4521	2114.03	30.018	95.8806	2114.03	30.018
U267		9335.55	103.04	12.4404	0.815943	0.639499	0.104763	1.62733	0.817773	3.7914	0.0566393	3.4244	0.429217	642.263	9.95389	606.805	17.3239	476.524	75.8471	134.781
U268		23589	151.007	27.0532	0.584861	0.0672125	0.167203	1.64356	1.61679	2.39633	0.0701624	1.74388	0.685866	996.682	15.1869	976.748	15.0482	932.188	36.1167	106.919	996.682	15.1869
U269		74816.3	143.982	47.7316	0.404635	0.0213759	0.308987	1.58647	4.79667	2.04514	0.11264	1.29063	0.775726	1735.72	24.1588	1784.32	17.2264	1841.63	24.0661	94.2493	1841.63	24.0661
U270		2085.99	25.9164	3.05478	0.936847	0.374942	0.102303	1.98816	0.789061	4.7617	0.0559652	4.32678	0.417531	627.889	11.8995	590.639	21.3282	449.989	96.2094	139.534
U271		39341	68.771	31.1095	1.21712	2.93471	0.335399	1.68208	4.06892	5.04319	0.0880261	4.7544	0.333536	1864.5	27.2526	1648.1	41.1207	1382.19	91.4954	134.894
U272		1857.42	21.887	2.34008	0.26286	0.0346331	0.110782	1.85843	0.819522	5.42787	0.0536768	5.09981	0.342386	677.286	11.9537	607.782	24.8269	356.5	115.229	189.982
U273		2461.68	13.8228	2.46416	0.391097	0.624973	0.171742	2.07262	1.6763	5.05639	0.0708218	4.61209	0.4099	1021.7	19.5908	999.577	32.1651	951.355	94.4919	107.395
U274		3995.48	24.5155	4.59438	0.846988	0.121868	0.163169	1.78336	1.59918	3.51995	0.071114	3.03474	0.506643	974.363	16.1353	969.892	22	959.774	62.2047	101.52	974.363	16.1353
U275		17344	148.952	20.8199	0.484523	0.439727	0.13253	1.4789	1.18155	2.53425	0.0646893	2.05798	0.583564	802.28	11.1645	792.034	13.9473	763.3	43.6326	105.107	802.28	11.1645
U276		24149.3	130.269	25.154	0.589888	0.0293145	0.178631	1.41968	1.82384	2.18187	0.074084	1.65682	0.650672	1059.49	13.882	1054.07	14.3268	1042.85	33.7975	101.596	1042.85	33.7975
U277		35504.8	201.668	42.5614	1.18346	0.0389301	0.168012	1.41217	1.65976	2.06309	0.0716802	1.50404	0.68449	1001.15	13.1057	993.284	13.0897	975.957	31.0482	102.581
U278		3559.47	49.4814	3.82942	1.14322	2.79086	0.0587408	2.1344	0.478065	7.61415	0.0590529	7.30887	0.280321	367.963	7.63641	396.744	25.0075	568.067	159.161	64.7747
U279		9117.08	60.955	11.2715	0.779239	0.284868	0.164624	1.43496	1.5903	2.6392	0.0700937	2.21501	0.543711	982.424	13.0863	966.415	16.4656	930.177	45.7289	105.617	982.424	13.0863
U280		15549.1	97.3773	15.9424	0.36819	0.0615486	0.159445	1.39095	1.55349	2.42283	0.0706954	1.98378	0.5741	953.69	12.3413	951.88	14.9807	947.699	40.9048	100.632	953.69	12.3413
U281		7479.68	55.5543	9.46705	0.813136	0.327973	0.150264	1.64345	1.35024	3.42093	0.0652005	3.0003	0.48041	902.443	13.8483	867.663	19.9647	779.867	63.2463	115.718
U282		44668.8	223.994	42.5807	0.560518	0.0455661	0.172978	1.56693	1.78408	2.09137	0.0748369	1.38511	0.749239	1028.5	14.9062	1039.67	13.6263	1063.22	28.3055	96.7344	1063.22	28.3055
U283		29761.6	365.555	35.3696	0.371307	0.044905	0.0946774	1.47316	0.782591	2.11644	0.0599767	1.51957	0.696058	583.141	8.21944	586.961	9.44292	601.762	33.2095	96.9055	583.141	8.21944
U284		238218	190.276	106.246	0.293611	0.0745395	0.511749	1.3974	12.0142	1.82824	0.170345	1.17888	0.76434	2664.09	30.5274	2605.51	17.2286	2560.29	20.8029	104.055	2560.29	20.8029
U285		5907.38	32.4107	4.81785	0.505913	3.34177	0.129597	1.66338	1.14547	4.25625	0.0641334	3.91776	0.39081	785.565	12.3093	775.102	23.0798	745.081	82.9516	105.434	785.565	12.3093
U286		16715.6	103.975	21.8698	1.37244	0.137258	0.161968	1.41141	1.58422	2.37549	0.0709711	1.91073	0.594154	967.702	12.6931	964.029	14.8012	955.661	39.3739	101.26	967.702	12.6931
U287		15319.9	173.993	20.1035	0.682221	0.050707	0.105083	1.35596	0.889567	2.3832	0.0614245	1.95985	0.568967	644.127	8.31906	646.137	11.4006	653.166	42.3127	98.6162	644.127	8.31906
U288		11857.2	125.432	12.6385	0.235156	0.152774	0.101877	1.48195	0.875992	2.41327	0.0623904	1.90465	0.614083	625.4	8.83907	638.816	11.4503	686.556	40.9157	91.0924	625.4	8.83907
U289		16722.6	90.0911	17.1997	0.481873	0.325363	0.179058	1.66548	1.77705	2.61596	0.0720115	2.01729	0.636659	1061.82	16.3147	1037.1	17.0118	985.351	41.3534	107.761
U290		26813.4	198.557	27.8843	0.916629	b.d.	0.132374	1.47442	1.21396	2.16342	0.0665417	1.58319	0.681522	801.396	11.1193	807.008	12.0575	822.524	33.3968	97.4314	801.396	11.1193
U291		16748.1	175.444	21.8946	0.694195	0.192466	0.113087	1.63634	0.947379	2.99014	0.0607864	2.50267	0.547243	690.649	10.7234	676.737	14.7777	630.716	54.105	109.502	690.649	10.7234
U292		8199.41	49.9013	8.62278	0.582711	0.0690794	0.159186	1.52837	1.5823	2.71602	0.0721239	2.24518	0.562724	952.25	13.5396	963.275	16.911	988.525	45.9405	96.3305	952.25	13.5396
U293		-52.8779	1.16346	0.0817434	0.0046196	1.24847	0.111918	7.1442	-1.00837	68.219	-0.0653756	67.8438	0.104725	683.878	46.3567	0	0	0	0
U294		25083.6	206.563	33.4217	1.09344	0.0814241	0.132544	1.42702	1.19978	2.14026	0.0656803	1.5951	0.666751	802.363	10.7746	800.485	11.8653	795.262	33.7835	100.893	802.363	10.7746
U295		3751.26	41.7511	5.32406	1.20263	0.189453	0.102425	1.64396	0.877394	3.80208	0.0621558	3.4283	0.432383	628.607	9.85189	639.574	18.0475	678.512	73.4114	92.6449	628.607	9.85189
U296		4328.61	46.1438	5.76326	1.17718	0.193152	0.0998054	1.77712	0.902823	3.7142	0.0656361	3.26146	0.478467	613.268	10.4014	653.235	17.8992	793.849	68.5693	77.2525
U297		8847.34	54.7669	8.95291	0.34781	0.169258	0.159347	1.57668	1.55821	2.77466	0.0709537	2.28316	0.568243	953.148	13.9792	953.757	17.1727	955.16	46.9428	99.7894	953.148	13.9792
U298		192330	126.646	76.4775	0.465924	0.588547	0.512919	1.54694	13.7499	2.0053	0.194511	1.27601	0.771424	2669.08	33.8385	2732.64	19.0718	2779.95	22.0134	96.0118	2779.95	22.0134
U299		38880.9	450.045	37.9952	0.0791896	0.0287972	0.0895036	1.59681	0.728068	2.1367	0.0590236	1.41974	0.747328	552.601	8.46154	555.419	9.14859	566.986	31.2453	97.4629	552.601	8.46154
U305		63508.8	49.8717	28.2583	0.364316	3.54672	0.481879	1.55487	10.7906	2.29306	0.16248	1.68537	0.678078	2535.45	32.6222	2505.26	21.3766	2480.88	29.1602	102.2	2480.88	29.1602
U306		245.484	3.08638	0.236534	1.79568	0.00677367	0.0768471	4.84152	0.71856	15.4511	0.0678468	14.673	0.313345	477.276	22.2742	549.816	65.5987	862.946	304.421	55.3078
U307		2887.92	21.9566	2.94168	0.0588749	0.788085	0.140392	1.91498	1.32382	4.43614	0.0684194	4.00152	0.431678	846.881	15.2043	856.184	25.6669	880.355	82.9231	96.1977	846.881	15.2043
U308		29088.8	366.949	35.7801	0.246692	0.00214069	0.0994957	1.37555	0.820087	1.98967	0.0598066	1.43759	0.691346	611.453	8.03095	608.097	9.11228	595.612	31.4841	102.66	611.453	8.03095
U309		2385.92	32.3286	3.79691	1.47894	0.205384	0.0895374	1.87566	0.727543	4.63334	0.0589587	4.23672	0.404818	552.801	9.94094	555.11	19.8168	564.592	92.3895	97.9115	552.801	9.94094
U310		1211.09	10.9033	1.54614	0.725614	0.650585	0.127702	2.41586	1.02107	7.80323	0.0580165	7.41984	0.309597	774.743	17.6406	714.45	40.0323	529.398	162.637	146.344
U311		161638	209.861	110.895	0.986924	0.765444	0.435746	1.4233	9.76163	2.15876	0.162549	1.6231	0.659313	2331.57	27.8743	2412.54	19.9504	2481.59	28.1358	93.9547	2481.59	28.1358
U312		7542.55	91.2055	9.29051	0.489773	0.0906166	0.0965979	1.54887	0.801382	2.78048	0.0601958	2.30912	0.557053	594.44	8.80112	597.608	12.5664	609.646	50.1253	97.5057	594.44	8.80112
U313		415549	337.522	225.08	1.07365	0.694467	0.50874	1.58403	11.1047	2.12362	0.158382	1.41444	0.745908	2651.25	34.4612	2531.95	19.8563	2437.7	24.8143	108.76	2437.7	24.8143
U314		50692.8	75.2812	36.1293	1.26859	0.0429375	0.371675	1.45567	6.63514	1.98922	0.129533	1.35573	0.731782	2037.27	25.4503	2064.03	17.6088	2090.85	24.5917	97.4376	2090.85	24.5917
U315		4420.06	49.7629	4.88794	0.131327	0.148844	0.102722	1.6276	0.867513	3.32019	0.0612781	2.89389	0.490214	630.343	9.77966	634.216	15.6664	648.044	62.3275	97.2686	630.343	9.77966
U316		24975.5	111.832	22.427	0.599691	1.59133	0.177005	1.44209	1.85369	2.54775	0.0759879	2.10033	0.566025	1050.59	13.9917	1064.74	16.8197	1093.85	42.3542	96.0453	1093.85	42.3542
U317		21750.6	269.305	27.6493	0.512185	0.039068	0.0971168	1.41701	0.808446	2.18953	0.0604019	1.66917	0.647177	597.49	8.09231	601.582	9.94703	617.031	36.3292	96.8331	597.49	8.09231
U318		206683	203.226	124.926	0.3327	0.302245	0.570957	1.4948	12.4496	1.9713	0.158214	1.28514	0.758283	2911.75	35.0566	2638.93	18.6147	2435.91	22.71	119.535
U319		15051.4	118.775	17.5081	0.575222	0.0317688	0.13709	1.45168	1.26929	2.3567	0.0671813	1.85652	0.615979	828.185	11.291	832.071	13.3965	842.463	38.9337	98.3052	828.185	11.291
U320		153505	143.616	80.2867	1.01176	0.400432	0.431991	1.43711	9.71994	1.97454	0.163261	1.35408	0.727819	2314.69	27.9749	2408.6	18.2525	2488.96	23.7316	92.9982	2488.96	23.7316
U321		20375.6	161.655	25.4793	0.807834	0.144439	0.138916	1.5075	1.28325	2.4079	0.0670273	1.87761	0.626064	838.531	11.8617	838.299	13.7531	837.686	39.3983	100.101	838.531	11.8617
U322		8695.85	70.5405	9.44307	0.277678	0.18323	0.133565	1.49647	1.1918	2.69403	0.0647449	2.24017	0.555478	808.168	11.3749	796.793	14.8841	765.108	47.4381	105.628	808.168	11.3749
U323		302535	220.53	126.899	0.446886	0.0664837	0.501821	1.3201	12.7711	1.7458	0.184661	1.14243	0.756158	2621.62	28.4698	2662.92	16.5388	2694.44	20.0493	97.2973	2694.44	20.0493
U324		5922.47	72.7441	6.15859	0.144263	0.0040896	0.0906171	1.50854	0.794267	2.95814	0.063599	2.54458	0.509964	559.186	8.08558	593.59	13.3023	727.369	54.1491	76.8779
U325		23494.1	242.842	26.4835	0.406931	0.260773	0.104532	1.56878	0.896466	2.71638	0.0622269	2.21758	0.577526	640.915	9.57702	649.837	13.0454	680.955	47.5995	94.12	640.915	9.57702
Sample Kar 15 (Karish North 1 borehole, Early Miocene)
U326		3496.19	11.2187	1.96909	0.422453	6.91125	0.142031	2.63947	1.41352	11.2873	0.0722125	10.9744	0.233844	856.139	21.1662	894.641	67.1259	991.021	223.232	86.3896
U327		96975.7	545.541	87.8994	0.122859	0.0170243	0.167079	1.37463	1.71657	1.82244	0.0745476	1.19652	0.754282	995.995	12.6972	1014.74	11.7133	1055.43	24.6068	94.3691	1055.43	24.6068
U328		8415.38	84.7436	9.8023	0.392724	0.069345	0.112575	1.54964	0.984555	2.68876	0.0634588	2.19728	0.576342	687.686	10.1147	695.938	13.5526	722.687	46.8534	95.1568	687.686	10.1147
U329		129175	93.9388	53.4256	0.291028	0.566038	0.511205	1.74963	12.4803	2.20011	0.177144	1.3339	0.795246	2661.77	38.1803	2641.25	20.7602	2625.56	23.165	101.379	2625.56	23.165
U330		648.411	7.09303	0.670996	0.339641	3.56816	0.0879239	4.84276	0.563852	21.5271	0.0465321	20.9754	0.224961	543.247	25.2318	454.031	78.8114	24.1985	503.301	2244.96
U331		53805.1	89.1116	40.4824	1.34949	0.0673187	0.340497	1.5019	5.7166	2.0401	0.12182	1.3807	0.736186	1889.06	24.6134	1933.88	17.6797	1982.25	25.2839	95.2989	1982.25	25.2839
U332		9962.65	103.702	10.7645	0.296152	0.0476204	0.103231	1.52717	0.885437	2.60577	0.062236	2.11135	0.586072	633.316	9.21811	643.915	12.4331	681.269	45.3395	92.9612	633.316	9.21811
U333		57286.7	304.294	49.7194	0.455117	0.277167	0.149928	1.79553	1.48407	2.52163	0.0718235	1.7705	0.712052	900.559	15.0988	923.896	15.3097	980.027	36.3995	91.8912	900.559	15.0988
U334		47683.7	106.081	26.2796	0.394013	0.441407	0.222538	2.05757	3.87846	2.64935	0.126459	1.66897	0.776632	1295.27	24.1542	1609.21	21.4148	2048.52	30.0885	63.2295
U335		3095.88	63.1268	5.5696	0.23134	b.d.	0.0973741	1.62847	0.478762	8.64022	0.0356755	8.48537	0.188475	599.001	9.32057
U336		4393.46	41.7494	5.1694	0.400139	0.27795	0.120074	1.58591	1.04604	3.50108	0.063211	3.12129	0.452977	730.99	10.9667	726.919	18.1814	714.383	66.4769	102.325	730.99	10.9667
U337		14893.8	203.316	17.4427	0.370279	0.0412713	0.0837401	1.51302	0.679867	2.32623	0.0589094	1.76695	0.650418	518.408	7.54161	526.694	9.56611	562.77	38.7659	92.1172	518.408	7.54161
U338		205250	174.367	100.644	0.802028	0.580931	0.462643	1.43171	10.4321	1.96665	0.163614	1.3483	0.727994	2451.22	29.2226	2473.91	18.2998	2492.6	23.6313	98.3398	2492.6	23.6313
U339		30609.1	322.034	38.8661	0.301156	1.95192	0.119261	3.17096	0.976175	3.95087	0.0593915	2.35678	0.802597	726.307	21.7843	691.641	19.822	580.499	51.3979	125.118
U340		11085.6	161.598	13.03	0.261611	0.0313183	0.0814712	1.3883	0.654449	2.45179	0.0582862	2.02087	0.566238	504.898	6.74743	511.213	9.85385	539.553	44.4352	93.5771	504.898	6.74743
U341		8077.01	97.1426	9.52208	0.228917	0.0620176	0.100105	1.48767	0.834183	2.82692	0.0604642	2.40382	0.52625	615.026	8.73285	615.931	13.0613	619.258	52.0815	99.3166	615.026	8.73285
U342		5218.51	45.0348	8.42313	1.95201	0.058464	0.131429	1.59694	1.19004	3.18176	0.0657001	2.75198	0.501904	796.012	11.9659	795.98	17.5636	795.892	57.8954	100.015	796.012	11.9659
U343		9505.48	55.9436	9.39327	0.411969	0.0874506	0.160513	1.57385	1.58897	2.6865	0.071829	2.17721	0.585837	959.627	14.0421	965.894	16.7548	980.184	44.6214	97.9028	959.627	14.0421
U344		6498.13	75.4084	7.59895	0.323949	0.159296	0.0998064	1.53004	0.814298	2.95511	0.0591996	2.52817	0.517762	613.274	8.95687	604.862	13.4735	573.466	55.1716	106.942	613.274	8.95687
U345		102967	97.427	48.4638	0.453672	0.00330949	0.443644	1.42306	10.0888	1.89536	0.165005	1.25191	0.750813	2366.93	28.2198	2442.94	17.5882	2506.85	22.0517	94.4188	2506.85	22.0517
U346		12154.7	67.7898	12.4907	0.545214	0.0833031	0.171099	1.51844	1.75765	2.60388	0.0745382	2.11531	0.583145	1018.16	14.3115	1029.98	16.8663	1055.17	42.8919	96.4929	1055.17	42.8919
U347		101054	279.041	70.2751	0.485807	0.184247	0.228762	1.54115	3.38659	1.99504	0.107417	1.2669	0.772493	1328.01	18.5097	1501.3	15.6726	1755.23	23.8645	75.66
U348		169912	159.876	78.8415	0.730245	0.39707	0.400373	1.46211	9.46853	2.00769	0.171598	1.37589	0.728252	2170.76	26.9725	2384.5	18.5096	2572.54	23.9294	84.3819
U349		23306.7	162.465	24.5713	0.646177	0.0861876	0.134895	1.52852	1.26778	2.3222	0.0681929	1.74822	0.65822	815.732	11.7201	831.395	13.1939	873.492	36.5253	93.3875	815.732	11.7201
U350		3145.72	31.4672	4.29707	1.00537	0.156465	0.11485	1.71395	0.982961	3.86933	0.062101	3.46902	0.442959	700.855	11.3885	695.122	19.4812	676.626	74.3027	103.581	700.855	11.3885
U351		13391.7	100.514	13.2003	0.530448	2.15345	0.119061	1.43846	1.07011	2.86666	0.065216	2.47963	0.50179	725.155	9.87343	738.795	15.0551	780.368	52.3346	92.9247	725.155	9.87343
U352		3964.3	46.6186	6.50306	2.41162	0.505488	0.0862746	1.6313	0.782905	4.68843	0.0658446	4.39548	0.347942	533.467	8.35699	587.139	20.9083	800.497	92.2136	66.642
U353		6128.45	38.4045	9.67297	2.2859	0.173525	0.165345	1.65259	1.59441	3.5766	0.0699687	3.17191	0.462055	986.411	15.1246	968.025	22.328	926.512	65.3302	106.465	986.411	15.1246
U354		9106.22	109.061	13.503	0.923235	0.0297847	0.108164	1.57623	0.917899	2.74524	0.0615751	2.24764	0.574168	662.078	9.92418	661.248	13.3483	658.42	48.4149	100.556	662.078	9.92418
U355		66893	96.2843	41.7243	0.766721	0.0301079	0.366545	1.47948	6.58427	1.95987	0.130339	1.28539	0.754886	2013.12	25.6045	2057.24	17.3329	2101.75	23.3718	95.7832	2101.75	23.3718
U356		41737.2	80.9229	30.0807	0.962231	0.0925109	0.297492	1.45845	4.50767	2.05015	0.109944	1.44084	0.71139	1678.86	21.5753	1732.39	17.0779	1797.66	26.8405	93.3916	1797.66	26.8405
U357		12717.9	66.2069	12.9273	0.7349	0.0502805	0.171891	1.65272	1.76962	2.51782	0.0747002	1.89945	0.656409	1022.52	15.6369	1034.38	16.35	1059.54	38.5531	96.5062	1059.54	38.5531
U358		11144.7	68.9994	12.2453	0.896983	0.123879	0.148979	1.57364	1.4654	2.79945	0.0713717	2.31529	0.562125	895.237	13.1621	916.236	16.907	967.16	47.5106	92.5634	895.237	13.1621
U359		14443.9	21.6951	9.16274	0.651768	0.0386219	0.370992	1.64437	6.65593	2.44455	0.130178	1.80883	0.672667	2034.07	28.7052	2066.79	21.6251	2099.58	32.3426	96.8799	2099.58	32.3426
RM0 (n=14)		19570.6	290.001	26.3108	0.0248	b.d.	0.0981007	0.916517	0.81255	1.5514	0.0601007	1.36855	0.550614	603.264	5.26828	603.876	7.07843	606.14	29.6117	99.5815	603.264	5.26828
RM1 (n=7)		18564.6	227.873	20.3966	0.247154	b.d.	0.09102	1.40302	0.7331	2.48615	0.05844	1.81898	0.631902	561.572	7.53052	558.354	10.7024	545.189	39.9884	103.125	561.572	7.53052
RM2 (n=7)		139.452	2.1322	0.0402992	0.217873	b.d.	0.0121057	46.4045	-0.0254557	-2928.06	-0.0210857	-2839.11	0.270905	77.5551	35.8221	-140.537	1218.84	640.236	3624.4	7.80303
RM3 (n=8)		4174.22	21.4148	3.75165	0.252555	b.d.	0.152738	81.0925	1.52713	81.5372	0.0634475	81.0491	0.407923	907.585	735.605	896.837	727.366	873.664	714.793	91.1306	907.585	735.605
RM0
A001	GJ1	19846.9	274.449	24.8997	0.0250912	0.0263686	0.09823	0.56628	0.809	1.0385	0.05976	0.87052	0.545288	604.022	3.28105	601.867	4.73327	593.756	19.417	101.729	604.022	3.28105
A002	GJ1	21923.3	300.746	27.1757	0.0245379	0.0269458	0.09771	0.711033	0.8173	1.27408	0.06069	1.05722	0.558075	600.953	4.0925	606.515	5.83253	627.347	23.248	95.7928	600.953	4.0925
A040	GJ1	20952.8	294.815	26.8053	0.0249711	0.0162946	0.09846	0.594966	0.8095	1.06534	0.05966	0.88372	0.558476	605.353	3.45293	602.175	4.85653	590.229	19.7055	102.562	605.353	3.45293
A041	GJ1	21095.3	296.091	26.9633	0.0247881	0.0196463	0.09856	0.443822	0.815	0.998501	0.06	0.894442	0.444488	605.965	2.58726	605.269	4.57124	602.665	19.8947	100.548	605.965	2.58726
A080	GJ1	20516.4	295.917	26.6211	0.0249895	0.0250848	0.09734	0.532794	0.8013	1.08816	0.05973	0.948796	0.48963	598.807	3.06351	597.534	4.93168	592.708	21.0727	101.029	598.807	3.06351
A081	GJ1	19918.6	280.015	25.4739	0.0240162	0.0702335	0.09825	0.651843	0.821	1.08548	0.06064	0.867963	0.600513	604.141	3.77302	608.63	4.98651	625.375	19.2728	96.6047	604.141	3.77302
A130	GJ1	20075.5	290.877	26.4414	0.0252564	0.11687	0.09808	0.654467	0.8129	1.12006	0.06014	0.908965	0.584312	603.145	3.78214	604.086	5.11616	607.619	20.1856	99.2638	603.145	3.78214
A131	GJ1	19667.4	287.176	25.9776	0.0248551	0.0497568	0.09775	0.598354	0.8138	0.956042	0.06041	0.745646	0.625866	601.206	3.44972	604.6	4.37492	617.341	16.7433	97.3864	601.206	3.44972
A190	GJ1	18882.5	287.054	26.3112	0.0247299	0.053188	0.09909	0.488997	0.8179	1.01565	0.05989	0.890186	0.481461	609.07	2.86058	606.896	4.65829	598.787	19.8165	101.717	609.07	2.86058
A191	GJ1	18633.2	286.023	25.9138	0.0249364	0.0462908	0.09795	0.594089	0.811	1.09531	0.06007	0.9202	0.542392	602.387	3.43176	602.987	4.99716	605.247	20.4295	99.5274	602.387	3.43176
A250	GJ1	18779.6	298.303	26.9456	0.0251292	0.0529435	0.09758	0.616897	0.8124	1.10273	0.06041	0.914034	0.559425	600.238	3.55024	603.8	5.03576	617.198	20.2633	97.2521	600.238	3.55024
A251	GJ1	18488.4	293.408	26.6152	0.0241688	0.0815203	0.09805	0.50081	0.8072	0.859559	0.05974	0.698592	0.582636	602.957	2.90074	600.889	3.91973	593.093	15.8222	101.663	602.957	2.90074
A300	GJ1	17404.3	281.011	25.5772	0.024679	0.0275252	0.09841	0.628638	0.8238	0.967212	0.06074	0.73506	0.649948	605.064	3.64501	610.161	4.45538	629.13	16.4964	96.1746	605.064	3.64501
A301	GJ1	17804.4	294.13	26.6306	0.0250513	0.0416036	0.09795	0.429354	0.8036	0.883285	0.05953	0.771911	0.486088	602.389	2.49016	598.848	4.0167	585.464	17.3684	102.891	602.389	2.49016
		19570.6	290.001	26.3108	0.0248	b.d.	0.0981007	0.916517	0.81255	1.5514	0.0601007	1.36855	0.550614	603.264	5.26828	603.876	7.07843	606.14	29.6117	99.5815	603.264	5.26828
RM1
B003	BB	19342.3	223.419	19.7883	0.246448	0.0199999	0.09019	1.43326	0.724	2.2006	0.05824	1.66985	0.651306	556.681	7.64971	553.014	9.39104	537.943	36.8158	103.483	556.681	7.64971
B042	BB	20379.2	234.123	20.9333	0.246479	0.0228851	0.09093	1.38322	0.7384	2.15575	0.05892	1.65347	0.641643	561.06	7.43864	561.498	9.30576	563.271	36.309	99.6075	561.06	7.43864
B082	BB	19315.4	228.801	20.4869	0.249743	0.0381974	0.09091	1.37875	0.7296	2.18659	0.05823	1.69712	0.630551	560.937	7.41309	556.296	9.37297	537.347	37.4116	104.39	560.937	7.41309
B132	BB	19000.7	228.966	20.43	0.248597	0.065305	0.09049	1.40284	0.7333	2.26695	0.0588	1.78076	0.618824	558.423	7.51003	558.482	9.74556	558.725	39.0907	99.946	558.423	7.51003
B192	BB	18084.6	228.704	20.5232	0.247522	0.024955	0.09129	1.45595	0.7372	2.22983	0.0586	1.6889	0.65294	563.138	7.85686	560.767	9.61563	551.158	37.1486	102.174	563.138	7.85686
B252	BB	17037.4	229.191	20.4818	0.244246	0.0244883	0.09114	1.38479	0.7213	2.25453	0.05742	1.77911	0.614226	562.293	7.46271	551.406	9.59973	506.685	39.3932	110.975
B302	BB	16792.8	221.906	20.1328	0.247046	0.0430388	0.09219	1.37458	0.7479	2.23938	0.05887	1.76786	0.613824	568.471	7.48566	567.018	9.73717	561.196	38.7958	101.296	568.471	7.48566
		18564.6	227.873	20.3966	0.247154	b.d.	0.09102	1.40302	0.7331	2.48615	0.05844	1.81898	0.631902	561.572	7.53052	558.354	10.7024	545.189	39.9884	103.125	561.572	7.53052
RM2
C004	Monastery	95.6496	2.05548	0.0363366	0.215275	17.42	0.01425	13.3018	-0.05556	294.135	-0.02828	293.834	0.0452236	91.2349	12.0505	-58.041	175.692	0	0
C043	Monastery	-12.9234	2.24792	0.0202388	0.217906	5.64929	0.0117	14.7901	-0.1524	110.657	-0.0945	109.664	0.133657	74.9998	11.0283	-167.899	202.035	0	0
C083	Monastery	255.378	2.16905	0.055328	0.226427	25.7741	0.01385	15.0452	0.2635	53.6958	0.138	51.545	0.280192	88.6878	13.2519	237.462	113.695	2201.54	895.124	4.02845
C133	Monastery	668.109	2.10693	0.116037	0.212847	62.4253	0.007448	42.2864	0.3797	61.532	0.3699	44.6995	0.687226	47.8338	20.1523	326.806	171.939	3790.34	677.274	1.26199
C193	Monastery	-106.946	2.1446	-0.00693034	0.210093	7.4507	0.009102	24.0726	-0.7648	49.712	-0.6097	43.4947	0.484242	58.4093	13.9972	-1469.55	1641.28	0	0
C253	Monastery	56.5229	2.02349	0.0336662	0.216799	8.4381	0.0144	12.6153	0.1038	78.3358	0.05232	77.3134	0.161042	92.138	11.5409	100.28	74.8009	298.426	1763.74	30.8747
C303	Monastery	20.3758	2.17793	0.0274188	0.225761	2.54464	0.01399	13.7374	0.04757	131.14	0.02466	130.419	0.104754	89.5822	12.2213	47.1834	60.4609	-1808.65	4666.4	-4.95299
		139.452	2.1322	0.0402992	0.217873	b.d.	0.0121057	46.4045	-0.0254557	-2928.06	-0.0210857	-2839.11	0.270905	77.5551	35.8221	-140.537	1218.84	640.236	3624.4	7.80303
RM3
D005	91500	5127.08	23.9372	4.43958	0.290262	0.276968	0.1849	1.66598	1.867	3.72888	0.07324	3.33602	0.446778	1093.91	16.7721	1069.4	24.6659	1019.74	67.7274	107.273	1019.74	67.7274
D044	91500	5295.23	24.7834	4.37807	0.29108	0.292614	0.1752	1.78885	1.805	3.91001	0.07478	3.47681	0.457505	1040.5	17.1975	1047.4	25.5595	1061.82	70.1291	97.992	1061.82	70.1291
D084	91500	4686.16	24.3337	4.1802	0.285823	0.220331	0.1719	1.74783	1.644	3.80938	0.06938	3.38474	0.458823	1022.77	16.5394	987.287	24.0604	909.224	69.8758	112.488
D134	91500	4895.97	24.5766	4.3474	0.286886	0.328925	0.1757	1.77749	1.769	3.39274	0.07305	2.88985	0.523909	1043.53	17.1342	1034.17	22.0197	1014.44	58.7679	102.867	1014.44	58.7679
D194	91500	4680.14	24.405	4.17162	0.28743	0.28307	0.1694	1.69558	1.728	3.46813	0.07398	3.02538	0.488904	1009.04	15.8465	1018.89	22.3154	1040.1	61.27	97.0141	1040.1	61.27
D254	91500	4644.77	24.7997	4.41584	0.28668	0.377513	0.1765	1.77632	1.788	3.7829	0.07349	3.33991	0.469567	1048.07	17.1917	1041.15	24.6446	1026.65	67.7358	102.087	1026.65	67.7358
D304	91500	4064.39	24.4828	4.08049	0.292282	0.0799175	0.1683	1.7871	1.616	4.27639	0.06966	3.88507	0.417899	1002.86	16.6063	976.398	26.8307	917.335	80.0578	109.323	1002.86	16.6063
		4174.22	21.4148	3.75165	0.252555	b.d.	0.152738	81.0925	1.52713	81.5372	0.0634475	81.0491	0.407923	907.585	735.605	896.837	727.366	873.664	714.793	91.1306	907.585	735.605
Sequence 3b (09.2021)
grain	sample	207Pba	Ub	Pbb	Thb	206Pbcc	206Pbd	±2s	207Pbd	±2s	207Pbd	±2s	rhoe	206Pb	±2s	207Pb	±2s	207Pb	±2s	concf	Preferred age	±2s
		(cps)	(ppm)	(ppm)	U	(%)	238U	(%)	235U	(%)	206Pb	(%)		238U	(Ma)	235U	(Ma)	206Pb	(Ma)	(%)	(Ma)	(Ma)
Sample Kar 17 (Karish North 1 borehole, Early Miocene)
U006		2.2813e+06	462.411	293.125	0.17995	b.d.	0.581062	1.33664	19.3343	1.48941	0.241435	0.657067	0.897429	2953.08	31.7064	3058.65	14.5292	3128.74	12.7514	94.3857	3128.74	12.7514
U007		697947	289.686	127.368	0.330788	0.00310064	0.400791	1.34246	9.56699	1.50783	0.173201	0.686567	0.890321	2172.68	24.788	2394	13.9567	2588.07	13.242	83.9499
U008		27124.9	101.962	11.957	0.580243	0.00708421	0.109647	1.34827	1.03558	1.72584	0.0685301	1.07736	0.781225	670.695	8.59576	721.713	8.92859	883.699	22.7941	75.8963
U009		13725.1	65.6119	7.84729	1.00835	0.0835712	0.0996952	1.37091	0.816384	1.93813	0.0594175	1.37002	0.707338	612.623	8.0185	606.029	8.85464	581.45	30.1047	105.361	612.623	8.0185
U010		8043.9	23.5001	3.71117	0.285537	0.139752	0.158918	1.60502	1.45241	2.3797	0.066315	1.75695	0.674465	950.759	14.197	910.871	14.3237	815.393	37.0314	116.601
U011		64665.7	344.015	28.8885	0.201355	0.00386987	0.0870249	1.31034	0.715964	1.55868	0.0596956	0.844101	0.84067	537.918	6.76859	548.282	6.61397	591.582	18.8672	90.9287	537.918	6.76859
U012		8463.24	41.207	4.35444	0.576774	0.0963822	0.098095	1.41006	0.799568	2.18159	0.0591429	1.66466	0.646345	603.235	8.12655	596.585	9.85053	571.382	36.5023	105.575	603.235	8.12655
U013		194067	64.2202	37.1814	0.440875	0.224019	0.511744	1.31037	12.4959	1.52089	0.177177	0.772019	0.861586	2664.07	28.6304	2642.42	14.411	2625.88	14.4728	101.455	2625.88	14.4728
U014		31599.9	155.518	15.958	0.417958	0.0101205	0.0996937	1.34452	0.81893	1.68426	0.0596036	1.0144	0.798285	612.614	7.86428	607.451	7.7107	588.24	22.4782	104.143	612.614	7.86428
U015		15877.8	77.6252	11.0764	1.88307	0.0544749	0.10034	1.35784	0.837932	1.89126	0.0605938	1.31648	0.717957	616.402	7.98888	618.004	8.76517	623.876	28.7616	98.802	616.402	7.98888
U016		23346.1	77.3221	11.8386	0.968115	0.0585549	0.127173	1.39421	1.13827	1.78791	0.0649448	1.11928	0.779801	771.718	10.1487	771.689	9.67825	771.602	24.0302	100.015	771.718	10.1487
U017		27907.8	79.5814	14.191	0.97419	0.117956	0.150446	1.37694	1.43174	1.81219	0.0690519	1.17817	0.75982	903.464	11.6178	902.275	10.8511	899.363	24.7793	100.456	903.464	11.6178
U018		35104.9	145.362	17.6321	0.498331	0.051216	0.115091	1.34301	0.978502	1.73017	0.0616898	1.0908	0.776226	702.248	8.94358	692.836	8.70126	662.408	23.8293	106.014	702.248	8.94358
U019		70934.8	57.2409	10.2151	0.783138	26.8051	0.0969751	2.08358	0.851892	5.96762	0.0637409	5.59206	0.349148	596.657	11.8782	625.687	27.8773	732.093	118.554	81.5002
U020		17407.4	47.3241	11.331	2.60563	1.14733	0.136625	1.37952	1.14163	3.40099	0.0606304	3.10864	0.405623	825.549	10.6987	773.284	18.416	625.179	67.1806	132.05
U021		36666	173.294	17.3345	0.271303	0.0522025	0.100685	1.32337	0.842446	1.65052	0.0607118	0.986359	0.80179	618.42	7.8107	620.495	7.67459	628.07	21.7509	98.4636	618.42	7.8107
U022		23363.5	16.4601	6.71977	0.821499	0.0921384	0.346305	1.43072	5.40369	1.86747	0.113221	1.2002	0.76613	1916.93	23.7462	1885.44	16.0522	1850.93	22.4596	103.566	1850.93	22.4596
U023		55344.3	273.009	20.7614	0.127375	0.0278173	0.0791057	1.49526	0.648516	1.73747	0.0594849	0.884877	0.860595	490.782	7.07097	507.565	6.94884	583.913	19.7486	84.0506
U024		18483	89.8499	11.2435	1.30116	0.0150736	0.0983055	1.36016	0.824563	1.85311	0.0608612	1.25857	0.733985	604.471	7.85472	610.591	8.51361	633.363	27.4886	95.4383	604.471	7.85472
U025		8030.25	28.4405	3.43341	0.373999	0.407812	0.116312	1.42381	1.02616	2.50424	0.0640154	2.0601	0.568557	709.303	9.57085	717.006	12.8872	741.187	43.8298	95.6983	709.303	9.57085
U026		6938.32	34.4327	3.59889	0.534224	0.148714	0.0984558	1.42227	0.794015	2.35794	0.058517	1.8807	0.603183	605.353	8.22424	593.447	10.6043	548.189	41.3275	110.428	605.353	8.22424
U027		99876.9	325.525	46.4611	0.571621	0.0269956	0.131618	1.32456	1.20383	1.54241	0.0663657	0.790297	0.85876	797.091	9.94044	802.353	8.57231	816.99	17.19	97.5644	797.091	9.94044
U028		65192.8	128.697	22.4093	0.215062	0.48322	0.173075	1.34752	1.79085	1.64076	0.0750788	0.936105	0.821276	1029.03	12.8281	1042.13	10.714	1069.71	19.4644	96.1974	1069.71	19.4644
U029		72243.9	255.512	28.0059	0.683537	b.d.	0.102181	1.44274	0.941248	1.69405	0.0668389	0.887873	0.85165	627.176	8.62882	673.535	8.35284	831.819	19.118	75.3982
U030		39399.7	109.298	17.6028	0.48737	0.0231373	0.152558	1.34699	1.44351	1.66462	0.0686564	0.978047	0.809189	915.284	11.504	907.18	10.0041	887.503	20.781	103.13	915.284	11.504
U031		43510.3	139.521	19.702	0.345833	0.0493181	0.139052	1.32117	1.28062	1.61399	0.0668247	0.927079	0.818573	839.299	10.4067	837.129	9.21991	831.377	19.9116	100.953	839.299	10.4067
U032		14780.6	54.6256	6.87954	0.385504	0.0771419	0.122868	1.36492	1.08016	1.97912	0.0637884	1.43315	0.689661	747.053	9.63633	743.712	10.4473	733.669	30.7136	101.824	747.053	9.63633
U033		393193	130.002	76.7942	0.620623	0.0241551	0.503614	1.31036	12.5476	1.4901	0.180782	0.709478	0.879377	2629.31	28.3274	2646.3	14.1285	2659.31	13.5465	98.8717	2659.31	13.5465
U034		13975.3	83.3864	7.59288	0.635837	0.121069	0.0831646	1.3859	0.652349	2.005	0.0569161	1.4489	0.691223	514.984	6.86508	509.923	8.04501	487.293	32.2916	105.683	514.984	6.86508
U035		311358	103.179	59.5394	0.654114	0.0029961	0.488776	1.31941	12.0174	1.48328	0.178401	0.677698	0.889522	2565.38	27.9578	2605.77	14.0164	2637.31	13.0984	97.2726	2637.31	13.0984
U036		11353.1	49.8276	6.08564	0.791498	0.167127	0.107216	1.3941	0.891408	2.10377	0.0603269	1.57554	0.662667	656.559	8.70947	647.125	10.0771	614.35	34.34	106.871	656.559	8.70947
U037		10521.2	49.5702	5.23606	0.476775	0.154674	0.100525	1.3716	0.82403	2.1155	0.0594791	1.61061	0.648358	617.483	8.08318	610.294	9.71295	583.701	35.2652	105.787	617.483	8.08318
U038		97094.3	334.544	46.091	0.580792	0.0137324	0.127366	1.32549	1.15609	1.54641	0.0658617	0.796538	0.857137	772.821	9.66229	780.116	8.43608	801.042	17.3524	96.4769	772.821	9.66229
U039		305809	151.735	71.6386	0.500597	0.0149274	0.425054	1.30745	8.30364	1.49075	0.141749	0.716173	0.877043	2283.38	25.1691	2264.72	13.5973	2247.9	13.8575	101.578	2247.9	13.8575
U045		49291.7	241.029	23.8611	0.335268	0.0195245	0.0979143	1.32236	0.806641	1.58995	0.0597762	0.882796	0.831694	602.174	7.60911	600.568	7.21969	594.509	19.6734	101.289	602.174	7.60911
U046		30448.5	71.8242	13.4072	0.732126	0.0634396	0.165423	1.35164	1.68447	1.69705	0.0738858	1.02618	0.796464	986.844	12.379	1002.67	10.834	1037.44	21.3095	95.1227	1037.44	21.3095
U047		4716	14.73	2.09798	0.48559	0.205765	0.134746	1.51426	1.22192	2.94058	0.0657992	2.52072	0.514951	814.883	11.5996	810.652	16.4294	799.052	53.0382	101.981	814.883	11.5996
U048		97297.3	343.889	38.7142	0.0574637	0.00593594	0.120023	1.31408	1.07863	1.5271	0.0652084	0.77796	0.860509	730.695	9.08616	742.966	8.06209	780.122	17.0261	93.6641	730.695	9.08616
U049		140301	302.655	57.3534	0.572981	0.0311072	0.173206	1.32762	1.78441	1.52391	0.0747525	0.748155	0.871191	1029.75	12.6471	1039.79	9.9415	1060.95	15.8601	97.0595	1060.95	15.8601
U050		33489.5	128.371	16.1808	0.462882	0.0559987	0.120124	1.32211	1.0399	1.68951	0.0628139	1.05189	0.782542	731.279	9.14846	723.868	8.75912	700.977	22.879	104.323	731.279	9.14846
U051		32713.8	146.006	18.738	1.01604	0.0147671	0.107451	1.3141	0.905265	1.68167	0.0611309	1.04935	0.781428	657.925	8.22679	654.537	8.12538	642.877	23.0272	102.341	657.925	8.22679
U052		18241.6	82.4563	9.76524	0.703953	0.0503012	0.106699	1.34421	0.89749	1.87269	0.0610325	1.30387	0.717794	653.551	8.36175	650.385	9.00473	639.413	28.4235	102.211	653.551	8.36175
U053		394585	121.597	79.5503	0.78421	0.311987	0.534859	1.33413	13.209	1.52673	0.179195	0.742287	0.873851	2761.89	30.0065	2694.7	14.5272	2644.68	14.0276	104.432	2644.68	14.0276
U054		23325.3	88.0174	10.6761	0.34071	0.445305	0.118858	1.35014	1.03292	1.97771	0.0630572	1.44515	0.682679	723.985	9.25403	720.388	10.215	709.203	31.0827	102.084	723.985	9.25403
U055		87802.2	262.35	36.9299	0.373898	0.328907	0.13558	1.36093	1.26725	1.64037	0.0678204	0.915803	0.829647	819.621	10.4837	831.159	9.32684	862.136	19.6001	95.0686	819.621	10.4837
U056		19031.1	48.4451	7.79279	0.3199	0.0775849	0.158385	1.35252	1.55213	1.84726	0.0711064	1.2582	0.732175	947.793	11.932	951.34	11.4256	959.556	26.1732	98.7741	947.793	11.932
U057		55508.8	192.248	22.4907	0.258137	0.443581	0.116162	1.39618	1.05604	1.84006	0.0659647	1.19853	0.758772	708.437	9.37462	731.872	9.60936	804.314	25.5432	88.0797
U058		15616.7	66.1096	6.64138	0.392006	b.d.	0.0996276	1.40898	0.876253	1.8856	0.0638181	1.25311	0.74723	612.226	8.2357	638.957	8.9522	734.654	26.9479	83.3353
U059		38173.5	137.275	19.2153	0.839751	0.0186729	0.121179	1.33137	1.08312	1.6523	0.0648554	0.978536	0.80577	737.344	9.28455	745.158	8.73801	768.702	21.1428	95.9206	737.344	9.28455
U060		16153.6	65.2476	7.70812	0.38005	0.0781951	0.115441	1.36904	0.99356	1.87448	0.0624495	1.28039	0.730356	704.268	9.14146	700.535	9.49779	688.579	27.7125	102.279	704.268	9.14146
U061		31793.7	112.398	15.2821	0.529694	0.0415763	0.127669	1.34624	1.1414	1.69637	0.0648702	1.03213	0.793603	774.552	9.834	773.171	9.19601	769.184	22.2426	100.698	774.552	9.834
U062		66768.2	152.985	30.346	0.901264	0.0175491	0.167573	1.31177	1.70688	1.54838	0.0739082	0.822657	0.847183	998.724	12.1483	1011.11	9.93766	1038.05	17.3382	96.2111	1038.05	17.3382
U063		70142.6	53.237	20.742	0.839418	0.0295511	0.328778	1.33643	5.20149	1.58525	0.114794	0.852628	0.84304	1832.46	21.339	1852.86	13.5595	1875.84	16.434	97.687	1875.84	16.434
U064		71467	209.595	31.6514	0.545451	0.0103376	0.140409	1.35214	1.32895	1.57163	0.0686765	0.801087	0.860343	846.977	10.7414	858.425	9.12474	888.109	17.2442	95.3685	846.977	10.7414
U065		61599.5	138.041	26.6611	0.519829	0.0371817	0.180953	1.32692	1.83651	1.59192	0.0736412	0.879494	0.833531	1072.18	13.1193	1058.61	10.4902	1030.74	18.4577	104.02	1030.74	18.4577
U066		251031	187.199	63.4402	0.407853	0.022902	0.313096	1.31767	5.29956	1.51244	0.122816	0.742435	0.871223	1755.92	20.2755	1868.79	12.9816	1996.74	14.4739	87.9394
U067		6768.37	34.9216	3.54735	0.575507	0.150998	0.0944459	1.42455	0.767097	2.47157	0.0589334	2.01973	0.576376	581.777	7.93086	578.096	10.9012	563.656	44.2332	103.215	581.777	7.93086
U068		10072.9	49.8921	6.34263	1.35484	0.0897611	0.0985003	1.40949	0.802007	2.13547	0.0590792	1.60424	0.660037	605.614	8.15383	597.96	9.65898	569.037	35.2121	106.428	605.614	8.15383
U069		275842	122.592	58.0895	0.49093	0.0473023	0.420244	1.34712	9.47912	1.55257	0.163667	0.771842	0.867671	2261.59	25.7243	2385.53	14.3521	2493.14	14.547	90.7125	2493.14	14.547
U070		19159.9	58.6349	8.42594	0.323128	0.0478282	0.142364	1.36282	1.33249	1.86719	0.067914	1.27636	0.729879	858.016	10.9581	859.967	10.8466	864.997	26.9032	99.193	858.016	10.9581
U071		481717	184.306	97.5547	1.01508	0.0423358	0.407745	1.35929	9.65069	1.5346	0.171737	0.71228	0.885758	2204.6	25.4075	2402.02	14.2132	2573.89	13.621	85.6526
U072		80788.2	66.6845	23.552	0.468424	0.0599413	0.326527	1.33153	4.90068	1.57246	0.108901	0.836454	0.846781	1821.52	21.1511	1802.37	13.3171	1780.29	16.2899	102.316	1780.29	16.2899
U073		13715.1	56.8613	7.18213	0.633674	0.0875729	0.115846	1.36729	0.983133	1.9652	0.0615782	1.41158	0.695748	706.607	9.15847	695.21	9.90361	658.529	30.619	107.301	706.607	9.15847
U074		23349.6	52.4771	10.0269	0.56764	0.0482191	0.176614	1.38163	1.799	1.77767	0.0739096	1.11857	0.777214	1048.45	13.3808	1045.09	11.6231	1038.09	23.1258	100.998	1038.09	23.1258
U075		23296.4	116.815	11.4958	0.34948	0.0398352	0.0970369	1.3399	0.79799	1.75402	0.0596698	1.13192	0.763905	597.02	7.64691	595.694	7.91486	590.647	24.9701	101.079	597.02	7.64691
U076		24176.5	89.2409	11.6236	0.478557	0.0364519	0.123951	1.34364	1.08895	1.7509	0.0637461	1.12263	0.767398	753.265	9.56071	747.995	9.28166	732.263	24.2409	102.868	753.265	9.56071
U077		1.05199e+06	516.039	230.327	0.247137	0.00847333	0.424266	1.31252	8.31399	1.47435	0.142189	0.671563	0.890237	2279.82	25.2337	2265.84	13.4516	2253.26	13.1708	101.179	2253.26	13.1708
U078		35778.6	154.558	18.3552	0.570749	0.0183383	0.11043	1.32821	0.937146	1.65675	0.0615761	0.990292	0.801696	675.247	8.52261	671.387	8.15105	658.456	21.734	102.55	675.247	8.52261
U079		25277	63.4522	10.6568	0.394357	0.0718402	0.162264	1.5042	1.59445	1.88677	0.071299	1.13898	0.797237	969.345	13.5475	968.041	11.7921	965.081	23.7661	100.442	969.345	13.5475
U085		8797.18	46.9962	5.08638	1.04509	0.0719614	0.0890017	1.4082	0.723098	2.27919	0.0589512	1.79211	0.617853	549.63	7.42497	552.494	9.71901	564.315	39.3004	97.3977	549.63	7.42497
U086		261573	318.593	67.11	0.56852	1.88715	0.177304	1.35688	2.4189	1.81926	0.0989908	1.21185	0.745841	1052.23	13.1851	1248.23	13.0969	1604.35	23.2656	65.5858
U087		35252.5	134.31	16.6068	0.251752	0.0603109	0.124958	1.33592	1.08603	1.6561	0.0630629	0.978769	0.806665	759.036	9.5745	746.575	8.76935	709.398	21.331	106.997	759.036	9.5745
U088		20848.2	82.5103	10.0586	0.48984	0.113717	0.115125	1.37474	1.0206	1.9089	0.0643252	1.32439	0.72017	702.443	9.15692	714.217	9.80221	751.393	28.3628	93.4855	702.443	9.15692
U089		20781.3	73.3228	10.2737	0.546453	0.0649371	0.131122	1.35194	1.16374	1.81565	0.0643982	1.21196	0.744602	794.262	10.1117	783.71	9.92975	753.785	26.0152	105.37	794.262	10.1117
U090		7803.66	32.6536	5.24953	1.71419	0.0498161	0.117288	1.41322	1.00414	2.32809	0.0621206	1.85008	0.607029	714.936	9.57114	705.911	11.8537	677.301	39.8177	105.557	714.936	9.57114
U091		209618	103.13	48.3234	0.507634	1.49494	0.409085	1.32444	7.61752	1.57778	0.135112	0.857474	0.83943	2210.74	24.8153	2186.93	14.2393	2164.68	16.1632	102.128	2164.68	16.1632
U092		10987.4	50.9014	5.09339	0.391268	0.291552	0.0964438	1.38753	0.817859	2.22266	0.0615316	1.73637	0.624265	593.534	7.87411	606.853	10.162	656.905	37.5271	90.3532	593.534	7.87411
U093		276535	107.379	55.5468	0.459808	0.0215241	0.457787	1.34974	11.6852	1.59738	0.18521	0.854282	0.844976	2429.78	27.3546	2579.51	15.0435	2699.35	15.6481	90.0137	2699.35	15.6481
U094		30120	133.253	13.6741	0.022268	0.0406056	0.110925	1.33091	0.938086	1.6786	0.0613633	1.02292	0.79287	678.115	8.57431	671.88	8.26249	651.028	22.4431	104.161	678.115	8.57431
U095		30835.1	107.482	13.4174	0.31227	0.0109441	0.124571	1.45547	1.1878	1.89517	0.0691867	1.21379	0.767988	756.818	10.4011	794.941	10.4615	903.385	25.4856	83.7758
U096		27768.8	138.121	14.9168	0.661885	0.0432995	0.0979638	1.34602	0.80863	1.74435	0.0598933	1.10949	0.771648	602.465	7.74862	601.685	7.92943	598.746	24.4613	100.621	602.465	7.74862
U097		460881	154.301	91.9278	0.4555	0.0480017	0.530536	1.58187	12.7388	1.74338	0.174224	0.732857	0.907355	2743.71	35.378	2660.53	16.5129	2597.89	13.9112	105.613	2597.89	13.9112
U098		6784.06	86.5998	4.62601	0.953368	0.105787	0.045619	1.399	0.324239	2.29188	0.051572	1.81535	0.610416	287.568	3.93767	285.158	5.70126	265.445	41.8851	108.334	287.568	3.93767
U099		12766.3	41.192	5.98986	0.461728	0.118084	0.138856	1.39392	1.27344	2.13688	0.0665442	1.61964	0.652318	838.188	10.9652	833.93	12.1668	822.603	34.1497	101.895	838.188	10.9652
U100		24633	100.713	12.8064	0.636024	0.0354962	0.116304	1.34337	0.997146	1.77376	0.0622096	1.15827	0.757358	709.256	9.03048	702.36	9.00504	680.362	25.1795	104.247	709.256	9.03048
U101		119122	94.6981	39.1595	1.13166	0.0285261	0.32893	1.31675	5.16754	1.54206	0.113992	0.802576	0.853888	1833.19	21.0327	1847.29	13.1791	1863.2	15.6088	98.3897	1863.2	15.6088
U102		20758.9	67.8934	9.51054	0.447933	0.0662803	0.133691	1.37657	1.21271	1.79387	0.0658187	1.15023	0.767373	808.886	10.4735	806.435	9.99788	799.674	24.5671	101.152	808.886	10.4735
U103		50447.2	114.388	22.2253	0.654778	0.0242898	0.175129	1.3318	1.78105	1.62824	0.0737924	0.93674	0.817937	1040.31	12.8068	1038.56	10.6116	1034.89	19.5642	100.524	1034.89	19.5642
U104		35247.2	124.695	18.7939	0.837963	0.0249319	0.131729	1.34555	1.19345	1.70269	0.0657379	1.04339	0.790248	797.721	10.1051	797.557	9.4224	797.098	22.3832	100.078	797.721	10.1051
U105		190510	75.5553	43.3629	0.881113	0.0189094	0.468655	1.32419	10.483	1.51356	0.162303	0.733071	0.874883	2477.66	27.272	2478.41	14.131	2479.03	13.974	99.9447	2479.03	13.974
U106		14931.5	65.7195	7.11702	0.277377	0.0595679	0.108841	1.3671	0.918312	1.91992	0.06122	1.348	0.712063	666.011	8.65783	661.467	9.34302	646.007	29.3301	103.097	666.011	8.65783
U107		12988.4	29.6239	5.38856	0.378995	0.09168	0.176597	1.40056	1.78455	1.99439	0.0733229	1.41987	0.702248	1048.36	13.5627	1039.84	12.9974	1021.98	29.1631	102.581	1021.98	29.1631
U108		321671	112.645	65.3451	0.657938	0.0178487	0.491768	1.32575	11.9324	1.49881	0.17606	0.699169	0.884531	2578.32	28.207	2599.11	14.1527	2615.35	13.414	98.584	2615.35	13.414
U109		10569.4	49.7231	5.20129	0.341922	0.0944122	0.103157	1.38136	0.849336	2.09237	0.0597411	1.57157	0.66019	632.885	8.33386	624.284	9.76656	593.237	34.372	106.683	632.885	8.33386
U110		77450.5	436.574	36.6275	0.102781	0.0103791	0.0887813	1.34669	0.718222	1.5814	0.058699	0.829011	0.85158	548.326	7.085	549.616	6.7224	554.97	18.6508	98.8028	548.326	7.085
U111		263858	89.4337	57.9574	1.03606	0.00860809	0.509255	1.3163	12.2334	1.49071	0.174303	0.699695	0.883002	2653.45	28.6668	2622.47	14.1058	2598.64	13.4279	102.109	2598.64	13.4279
U112		449461	143.976	80.0671	0.469815	0.0243253	0.484119	1.34153	12.1569	1.50975	0.182206	0.692572	0.888575	2545.18	28.2428	2616.58	14.276	2672.31	13.2998	95.2427	2672.31	13.2998
U113		17863.1	72.1027	8.78455	0.389048	0.0748439	0.118821	1.37951	1.01753	1.83868	0.0621367	1.21561	0.75027	723.772	9.45232	712.67	9.42839	677.856	26.3946	106.774	723.772	9.45232
U114		29633.4	154.755	16.4277	0.708654	0.0347688	0.0954007	1.33102	0.782692	1.72355	0.0595296	1.09499	0.772255	587.399	7.47938	587.018	7.69403	585.544	24.2027	100.317	587.399	7.47938
U115		11411.8	61.8276	6.37691	0.664483	0.0740893	0.0939618	1.38438	0.759074	1.98562	0.0586174	1.42345	0.6972	578.926	7.67142	573.475	8.70889	551.933	31.4016	104.891	578.926	7.67142
U116		8864.78	36.1476	4.29714	0.353043	0.0737966	0.117247	1.43321	1.02568	2.27687	0.0634752	1.76919	0.629465	714.701	9.70329	716.766	11.7162	723.236	37.8244	98.8199	714.701	9.70329
U117		13927.1	68.9265	7.73454	0.679135	0.093676	0.101797	1.36871	0.845711	1.95861	0.0602808	1.40099	0.698819	624.934	8.15889	622.292	9.1223	612.698	30.6162	101.997	624.934	8.15889
U118		20146.3	63.5211	10.1225	0.814479	0.052884	0.138323	1.36334	1.27606	1.81773	0.066938	1.20227	0.750023	835.17	10.6888	835.098	10.3633	834.907	25.5047	100.032	835.17	10.6888
U119		5960.55	23.7848	2.53313	0.0417717	0.614688	0.112754	1.50113	1.00994	2.91365	0.0649915	2.49719	0.515207	688.723	9.81242	708.843	14.8733	773.114	52.7625	89.0842
U120		87409.8	247.847	35.2153	0.411522	0.118785	0.134352	1.67635	1.31918	1.89982	0.071245	0.893953	0.882375	812.646	12.8065	854.155	10.988	963.532	18.903	84.3403
U121		28638.6	141.782	16.5393	0.813077	0.0552314	0.102267	1.33164	0.837863	1.68368	0.0594474	1.0303	0.790907	627.679	7.97144	617.966	7.80512	582.543	22.8362	107.748	627.679	7.97144
U122		57715	137.992	30.2877	1.33404	0.0112189	0.169874	1.31252	1.72045	1.58556	0.0734865	0.889546	0.827796	1011.42	12.298	1016.19	10.205	1026.49	18.6636	98.5317	1026.49	18.6636
U123		26260.9	80.8246	12.913	0.743501	0.0107947	0.14264	1.35087	1.35934	1.71666	0.0691481	1.05928	0.786919	859.573	10.8806	871.585	10.0602	902.235	22.3706	95.2716	859.573	10.8806
U124		119013	515.744	53.7915	0.2451	b.d.	0.109218	1.82725	1.00568	1.98122	0.0668129	0.765762	0.922285	668.203	11.6037	706.689	10.0984	831.01	16.6674	80.4086
U125		21752.6	91.734	10.7902	0.446951	0.0574903	0.112691	1.32949	0.965641	1.85865	0.0621756	1.29885	0.715301	688.358	8.68781	686.215	9.28299	679.193	28.1417	101.35	688.358	8.68781
U126		19868.8	54.6761	8.71699	0.387383	0.0957275	0.154201	1.36634	1.48122	1.7827	0.0696988	1.14506	0.766441	924.47	11.7778	922.728	10.8242	918.567	24.0443	100.643	924.47	11.7778
U127		10899	52.2167	5.62438	0.380178	0.0868365	0.105644	1.41095	0.875572	2.06477	0.0601371	1.50748	0.683346	647.398	8.69769	638.589	9.79686	607.539	32.9198	106.561	647.398	8.69769
U128		28783.4	168.79	23.4612	2.36312	0.00882874	0.0906077	1.3527	0.726899	1.74583	0.0582107	1.10368	0.77482	559.13	7.25083	554.731	7.47125	536.717	24.5759	104.176	559.13	7.25083
U129		23762.8	81.5367	12.5873	0.78648	0.0555376	0.135756	1.39863	1.2042	1.85773	0.0643625	1.22271	0.752867	820.618	10.7858	802.522	10.3197	752.616	26.243	109.035	820.618	10.7858
U135		29587.4	111.088	14.1538	0.778829	0.114065	0.111101	1.4264	1.05741	1.92321	0.0690587	1.29001	0.741675	679.138	9.20155	732.544	10.0487	899.565	27.0447	75.4963
U136		34040.7	158.776	18.0771	0.523566	0.0211304	0.107489	1.34861	0.906386	1.66822	0.0611845	0.981931	0.808416	658.151	8.44519	655.134	8.06581	644.761	21.6032	102.077	658.151	8.44519
U137		25049.8	134.285	13.9234	0.650497	0.0298998	0.0943811	1.33828	0.771215	1.73627	0.0592904	1.10619	0.770777	581.396	7.44666	580.46	7.68645	576.799	24.4748	100.797	581.396	7.44666
U138		113225	79.5113	31.6203	0.568381	0.0417961	0.355019	1.31264	5.88389	1.54452	0.120256	0.813936	0.849875	1958.52	22.195	1958.86	13.4706	1959.22	15.6838	99.964	1959.22	15.6838
U139		23356.5	83.8068	11.5456	0.409787	0.0725816	0.133543	1.35792	1.19317	1.82415	0.0648299	1.21802	0.744411	808.048	10.3218	797.431	10.0913	767.875	26.0858	105.232	808.048	10.3218
U140		64049.5	109.705	25.0916	0.476823	0.0194218	0.21504	1.32858	2.43876	1.57093	0.0822894	0.838268	0.845729	1255.61	15.1726	1254.11	11.3445	1251.53	17.199	100.326	1251.53	17.199
Sample Myr 17 (Myra 1 borehole, Late Oligocene)
U141		7681.85	39.3496	5.19247	1.5775	0.0604429	0.0978766	1.42555	0.800132	2.38167	0.0593167	1.90792	0.598551	601.953	8.19901	596.903	10.7567	577.762	41.7144	104.187	601.953	8.19901
U142		12288.5	65.6494	8.10047	1.30375	0.0508696	0.0973431	1.37179	0.794076	2.09195	0.0591904	1.57937	0.655751	598.82	7.85113	593.481	9.41025	573.127	34.6524	104.483	598.82	7.85113
U143		25041.1	111.255	12.6486	0.406451	0.0353208	0.110377	1.33523	0.937961	1.74257	0.0616595	1.11969	0.766242	674.937	8.56383	671.814	8.57583	661.356	24.4408	102.054	674.937	8.56383
U144		59738.4	158.121	24.7748	0.370947	0.0509613	0.151348	1.32816	1.50768	1.5932	0.0722815	0.87993	0.833643	908.514	11.2653	933.5	9.74676	992.963	18.5556	91.4953	908.514	11.2653
U145		97467.5	70.7065	26.2449	0.530762	0.034419	0.332789	1.38116	5.68955	1.60795	0.124052	0.823349	0.858956	1851.88	22.2536	1929.78	13.9481	2014.51	15.7753	91.9272	2014.51	15.7753
U146		9338.91	20.9219	4.0093	0.63881	0.132526	0.172841	1.45325	1.77014	2.26556	0.0743111	1.73805	0.641455	1027.75	13.817	1034.57	14.7166	1049.02	35.3879	97.972	1049.02	35.3879
U147		104129	225.316	41.5084	0.447816	b.d.	0.1811	1.44392	2.24065	1.94559	0.0897737	1.304	0.742151	1072.98	14.2839	1193.86	13.6833	1419.86	25.4884	75.5696
U148		16485.5	73.3372	8.49209	0.489527	0.0551695	0.110002	1.35459	0.932734	1.82186	0.0615251	1.2183	0.743522	672.758	8.66121	669.072	8.93911	656.679	26.5379	102.448	672.758	8.66121
U149		313142	238.157	65.2355	0.593251	1.33504	0.225426	1.43011	4.35648	2.29343	0.140225	1.79294	0.623566	1310.48	16.9736	1704.12	18.9751	2229.21	31.6579	58.7866
U150		8216.61	36.0929	4.81458	1.01501	0.0696731	0.111735	1.42278	0.958895	2.154	0.0622697	1.61722	0.66053	682.815	9.22538	682.724	10.7163	682.422	34.8511	100.058	682.815	9.22538
U151		11289.9	30.7676	6.61685	1.64777	0.0631148	0.156539	1.41938	1.52509	2.0437	0.0706912	1.4704	0.694514	937.517	12.3947	940.525	12.5496	947.578	30.4968	98.9382	937.517	12.3947
U152		21572.2	71.7869	10.9098	0.686467	0.0724213	0.136688	1.35217	1.24987	1.82888	0.0663479	1.23144	0.739342	825.907	10.4911	823.345	10.3314	816.432	26.1733	101.161	825.907	10.4911
U153		259603	97.5822	53.8324	0.439475	0.00688925	0.493285	1.32637	11.3975	1.50209	0.167651	0.704988	0.883018	2584.87	28.2786	2556.22	14.129	2533.57	13.5317	102.025	2533.57	13.5317
U154		23074	137.012	13.3358	0.622421	0.0159738	0.0895708	1.34586	0.714609	1.79848	0.057889	1.19298	0.748329	552.998	7.13841	547.479	7.62007	524.579	26.5505	105.417	552.998	7.13841
U155		12215.3	33.1046	5.19648	0.332915	0.119966	0.153588	1.41703	1.47182	1.98235	0.069533	1.38627	0.714822	921.045	12.1719	918.875	12.0016	913.669	28.9404	100.807	921.045	12.1719
U156		19467.2	82.9047	9.7348	0.353377	0.0228412	0.115769	1.35609	0.999195	1.7826	0.0626257	1.15701	0.760737	706.164	9.0782	703.401	9.05909	694.586	25.0986	101.667	706.164	9.0782
U157		8750.59	26.2793	3.83973	0.546236	0.0814544	0.134061	1.47566	1.25058	2.30742	0.0676867	1.77388	0.639527	810.992	11.2537	823.668	13.031	858.043	37.1391	94.5164	810.992	11.2537
U158		94820.2	500.172	44.547	0.0247701	0.00393787	0.096407	1.31829	0.799822	1.53512	0.0601975	0.786585	0.858752	593.318	7.47924	596.728	6.93874	609.71	17.614	97.3115	593.318	7.47924
U159		13997.6	71.016	8.32441	0.905906	0.023048	0.101107	1.37611	0.851464	1.82739	0.0611053	1.20236	0.753048	620.893	8.1524	625.452	8.5438	641.975	26.2612	96.7161	620.893	8.1524
U160		12623.6	65.0788	8.25122	1.26099	0.0296821	0.100654	1.36677	0.825925	2.0583	0.0595395	1.539	0.66403	618.238	8.06416	611.348	9.46272	585.905	33.7125	105.519	618.238	8.06416
U161		15829.8	82.7128	9.74443	1.03658	0.00779907	0.098499	1.34758	0.822053	1.83508	0.0605567	1.24561	0.734345	605.607	7.79615	609.193	8.41685	622.554	27.2597	97.2777	605.607	7.79615
U162		8867.45	33.5172	5.08023	1.04591	0.0769804	0.126227	1.43726	1.12135	2.17543	0.0644589	1.63303	0.660678	766.303	10.3924	763.62	11.6878	755.775	34.7829	101.393	766.303	10.3924
U163		21657.4	96.7306	10.768	0.314578	0.0394609	0.110779	1.40836	0.946238	1.82131	0.0619779	1.15486	0.773267	677.271	9.06168	676.142	9.00295	672.383	25.1385	100.727	677.271	9.06168
U164		314350	121.961	72.8706	0.997162	0.280356	0.46887	1.33014	11.2825	1.52054	0.1746	0.73672	0.874784	2478.6	27.4028	2546.76	14.2876	2601.49	13.9661	95.2764	2601.49	13.9661
U165		17941.3	45.2375	11.0163	1.71741	0.0179291	0.178834	1.37715	1.78444	1.86563	0.0724013	1.25858	0.73817	1060.6	13.4798	1039.8	12.1606	996.328	26.0452	106.451
U166		375040	149.022	79.1941	0.720191	0.00187128	0.445334	1.33001	10.7883	1.49518	0.175777	0.683121	0.889528	2374.48	26.4479	2505.06	13.998	2612.67	13.1839	90.8831	2612.67	13.1839
U167		7472.87	31.5272	3.36285	0.0654928	0.20682	0.1132	1.43318	0.987056	2.28613	0.0632689	1.78112	0.626904	691.305	9.40219	697.217	11.5406	716.325	38.117	96.5071	691.305	9.40219
U168		52675.3	124.569	21.345	0.513689	1.30576	0.155311	1.32366	1.54192	1.83654	0.0720369	1.2731	0.720738	930.664	11.4817	947.271	11.3301	986.069	26.3731	94.3812	930.664	11.4817
U169		287202	118.608	70.298	0.99735	0.0118665	0.474018	1.30539	10.6138	1.48321	0.162468	0.704182	0.88011	2501.16	27.0944	2489.91	13.8672	2480.75	13.5439	100.822	2480.75	13.5439
U170		6075.61	50.5019	3.58732	0.510383	0.0923754	0.0675654	1.42069	0.51366	2.53646	0.0551627	2.10126	0.560108	421.471	5.80065	420.907	8.74457	417.818	47.1451	100.874	421.471	5.80065
U171		30235.1	143.613	14.8726	0.0745005	0.0192214	0.110483	1.31338	0.926883	1.69035	0.060873	1.06409	0.77699	675.551	8.43123	665.993	8.26851	633.781	23.3701	106.591	675.551	8.43123
U172		49861.3	294.018	29.9866	0.79472	0.0117357	0.0895289	1.31896	0.71782	1.59897	0.0581763	0.90392	0.824877	552.75	6.99297	549.379	6.79464	535.424	20.2998	103.236	552.75	6.99297
U173		240614	88.1041	46.9799	0.303539	0.0798327	0.485692	1.3287	11.9307	1.50886	0.178238	0.715004	0.880595	2552.01	28.0345	2598.98	14.246	2635.79	13.6351	96.8214	2635.79	13.6351
U174		27386.3	96.3152	15.917	1.04927	0.0473763	0.136872	1.33426	1.22862	1.78896	0.0651328	1.19169	0.745831	826.948	10.3647	813.712	10.0294	777.684	25.5031	106.335	826.948	10.3647
U175		26901.4	65.6542	14.3306	1.17653	0.0338227	0.175429	1.33161	1.75678	1.71647	0.0726625	1.08309	0.775784	1041.95	12.8236	1029.66	11.1286	1003.64	22.5313	103.817	1003.64	22.5313
U176		37481.4	193.33	19.5523	0.316182	0.0314952	0.100449	1.4508	0.842235	1.75086	0.0608388	0.980142	0.828624	617.041	8.54335	620.378	8.13868	632.57	21.6053	97.5452	617.041	8.54335
U177		5503.97	26.6724	3.21223	0.864738	0.101501	0.104602	1.46647	0.875778	2.42091	0.0607505	1.9262	0.605754	641.32	8.95868	638.7	11.485	629.442	41.7552	101.887	641.32	8.95868
U178		12464.2	63.1134	7.89054	1.08928	0.0226915	0.103371	1.37329	0.856767	2.03487	0.0601396	1.50158	0.674881	634.131	8.3008	628.357	9.54348	607.627	32.7931	104.362	634.131	8.3008
U179		6615.37	13.9348	4.28432	2.48925	0.136364	0.190879	1.50995	1.98703	2.57084	0.0755338	2.08069	0.587336	1126.13	15.6132	1111.11	17.3812	1081.84	42.0366	104.094	1081.84	42.0366
U180		7415.43	19.736	6.14706	3.58088	0.0475177	0.165831	1.46798	1.63249	2.29602	0.0714299	1.76543	0.639359	989.098	13.4711	982.82	14.4728	968.824	36.357	102.093	989.098	13.4711
U181		28423.7	161.511	17.062	0.971556	0.676025	0.0864043	1.34363	0.665344	2.14164	0.0558734	1.66772	0.627383	534.236	6.8947	517.877	8.69512	446.34	37.3353	119.693
U182		39105.3	108.199	17.5119	0.266957	0.0288234	0.162226	1.32549	1.56731	1.63791	0.0701015	0.962196	0.809258	969.136	11.9381	957.362	10.1739	930.406	20.3429	104.163	969.136	11.9381
U183		16002.5	46.3474	7.51231	0.44038	0.0451198	0.155349	1.36905	1.49017	1.90594	0.0696017	1.326	0.71831	930.881	11.8773	926.385	11.5981	915.7	27.7103	101.658	930.881	11.8773
U184		42287.8	107.611	19.7384	0.509818	0.0215429	0.17225	1.33565	1.70765	1.64369	0.0719341	0.95799	0.812595	1024.5	12.6636	1011.4	10.5483	983.16	20.1161	104.204
U185		12631.8	56.5169	6.62757	0.616886	0.105978	0.106445	1.36083	0.897971	2.0008	0.0612112	1.46674	0.680144	652.069	8.44674	650.643	9.622	645.698	31.8533	100.987	652.069	8.44674
U186		40772.4	234.464	20.6075	0.0961095	0.016945	0.093256	1.34463	0.757407	1.64616	0.0589314	0.949646	0.816826	574.765	7.40033	572.513	7.21428	563.582	21.1845	101.984	574.765	7.40033
U187		81310.2	454.764	40.2838	0.0913903	0.00297086	0.0942362	1.32119	0.770407	1.54768	0.0593193	0.806092	0.853656	580.542	7.3414	579.996	6.84984	577.859	18.1052	100.464	580.542	7.3414
U188		282253	115.775	64.9412	0.692191	0.00979522	0.477239	1.32272	10.7513	1.49409	0.163463	0.694769	0.885304	2515.23	27.5797	2501.87	13.9836	2491.04	13.4003	100.971	2491.04	13.4003
U189		146611	105.633	50.2007	0.999098	0.00479263	0.398092	1.43687	6.79507	1.63644	0.123852	0.783153	0.878048	2160.25	26.3997	2085.08	14.5537	2011.65	15.1209	107.387	2011.65	15.1209
U195		76273.5	195.669	36.129	0.677392	0.0255756	0.164921	1.35449	1.62536	1.60838	0.07151	0.86732	0.842145	984.066	12.3727	980.064	10.1326	971.11	18.3602	101.334	984.066	12.3727
U196		15190.7	49.4454	7.77737	0.674894	0.0379393	0.142411	1.38899	1.31841	1.90686	0.067174	1.30646	0.728416	858.28	11.1713	853.816	11.0259	842.237	27.6101	101.905	858.28	11.1713
U197		82656.6	343.015	45.0763	0.795565	0.00626976	0.114933	1.35476	1.01996	1.59024	0.0643924	0.832776	0.851916	701.33	9.01053	713.894	8.16776	753.597	18.2022	93.0644	701.33	9.01053
U198		22314.3	116.064	12.1748	0.757864	0.209456	0.0914423	1.36237	0.76584	1.92102	0.0607694	1.35435	0.709191	564.061	7.36419	577.374	8.46868	630.115	29.5387	89.5173	564.061	7.36419
U199		47683.1	279.386	24.1674	0.0745245	0.0326074	0.0923104	1.31229	0.740997	1.61018	0.0582452	0.933033	0.815	569.187	7.15562	562.987	6.96911	538.012	20.913	105.794	569.187	7.15562
U200		6041.84	21.4625	3.4778	1.0832	0.115663	0.133441	1.48203	1.20079	2.31322	0.0652936	1.77611	0.64068	807.468	11.2561	800.951	12.827	782.866	37.6172	103.143	807.468	11.2561
U201		215299	70.5318	50.2416	1.46955	0.00618758	0.513963	1.32097	13.0852	1.50672	0.184732	0.724748	0.876715	2673.53	28.9439	2685.81	14.3297	2695.08	13.7528	99.2004	2695.08	13.7528
U202		3709.85	14.1638	19.1915	38.3188	0.00188497	0.118365	1.57906	1.1103	3.0318	0.0680628	2.58812	0.520834	721.146	10.7804	758.316	16.2049	869.535	53.8494	82.9347
U203		14372.9	73.597	10.4063	1.71098	0.101101	0.100646	1.39134	0.824978	2.03821	0.0594756	1.48945	0.68263	618.195	8.20835	610.822	9.36466	583.573	32.6597	105.933	618.195	8.20835
U204		237351	99.6255	50.7875	0.595821	0.00179082	0.441531	1.331	9.98717	1.50514	0.164125	0.702769	0.884303	2357.49	26.3107	2433.6	13.9902	2497.85	13.5151	94.3807	2497.85	13.5151
U205		151204	392.572	88.7657	1.86587	b.d.	0.187069	1.41764	2.42591	2.22238	0.0940949	1.71152	0.63789	1105.48	14.4137	1250.31	16.0015	1509.17	32.7727	73.2507
U206		34366.3	150.167	14.4943	0.504863	0.00450258	0.0889993	1.43377	0.787286	1.8139	0.064186	1.11109	0.790435	549.616	7.55935	589.631	8.12289	746.815	23.9492	73.5947
U207		78481.1	194.754	39.0559	0.871448	0.000353561	0.173501	1.33732	1.76613	1.57614	0.0738606	0.834132	0.848481	1031.37	12.7579	1033.1	10.2423	1036.75	17.5631	99.4811	1036.75	17.5631
U208		15149.1	48.0755	8.7851	1.10844	0.0239337	0.150751	1.37534	1.41685	1.91539	0.0681959	1.33309	0.718051	905.172	11.6248	896.041	11.4177	873.581	28.0259	103.616	905.172	11.6248
U209		80326.7	107.8	21.503	0.4457	1.55126	0.172987	1.37831	2.18613	2.08481	0.0916974	1.5642	0.661118	1028.55	13.115	1176.63	14.5468	1460.27	30.2152	70.4354
U210		24095.4	67.1131	12.9428	1.03106	0.0148766	0.160255	1.37407	1.54828	1.76336	0.0701024	1.10516	0.779235	958.193	12.2452	949.809	10.8978	930.431	23.2026	102.984	958.193	12.2452
U211		7427.89	41.2345	5.04767	1.32418	0.0746247	0.0965282	1.4226	0.791906	2.22877	0.0595269	1.7157	0.63829	594.03	8.07927	592.252	10.0093	585.446	37.5179	101.466	594.03	8.07927
U212		19393	87.9907	10.3306	0.493159	0.0413505	0.11135	1.35363	0.938852	1.81394	0.0611789	1.20749	0.746241	680.583	8.75053	672.281	8.93046	644.562	26.3592	105.588	680.583	8.75053
U213		9500.52	35.3297	5.01086	0.634986	0.0747287	0.130065	1.43042	1.15568	2.15951	0.0644718	1.61783	0.662383	788.239	10.6214	779.922	11.7674	756.197	34.4627	104.237	788.239	10.6214
U214		40685	116.989	26.2518	1.87032	0.0410875	0.160401	1.35518	1.59792	1.67581	0.0722842	0.985806	0.808674	959.004	12.0867	969.399	10.4868	993.039	20.6385	96.5727	959.004	12.0867
U215		14143.7	85.1353	7.32588	0.466899	0.0861792	0.0840674	1.44665	0.688272	2.24013	0.0594055	1.71038	0.645788	520.355	7.23725	531.762	9.28005	581.013	37.4304	89.5599	520.355	7.23725
U216		153765	79.8984	38.9294	0.547752	0.00796948	0.43432	1.32692	8.51431	1.51312	0.142244	0.727187	0.876946	2325.16	25.9315	2287.45	13.8368	2253.93	14.0235	103.16	2253.93	14.0235
U217		539225	395.937	136.603	0.0638117	0.00457241	0.349274	1.33038	5.86256	1.50061	0.121791	0.694205	0.886559	1931.13	22.2243	1955.71	13.0844	1981.83	13.7093	97.4418	1981.83	13.7093
U218		39708.5	145.356	22.2069	0.869035	0.00825649	0.132256	1.35382	1.18551	1.67825	0.0650407	0.991814	0.806686	800.721	10.2031	793.877	9.25932	774.708	21.3968	103.358	800.721	10.2031
U219		24291.3	87.1301	11.4309	0.250721	0.0319672	0.1324	1.3822	1.20272	1.76803	0.065913	1.10248	0.781771	801.54	10.4266	801.839	9.81737	802.671	23.576	99.8591	801.54	10.4266
U220		49061	167.575	22.5074	0.226012	0.0160728	0.13623	1.34314	1.24139	1.6296	0.0661192	0.922804	0.824214	823.312	10.3905	819.511	9.18125	809.209	19.8866	101.743	823.312	10.3905
U221		37556.6	126.858	20.1245	0.574416	0.00765632	0.148977	1.32406	1.37117	1.63283	0.0667829	0.955507	0.8109	895.228	11.0775	876.665	9.60588	830.072	20.4912	107.849	895.228	11.0775
U222		37977.5	146.616	17.3298	0.575192	0.00117838	0.109871	1.42685	1.02954	1.72292	0.0679913	0.965681	0.828159	672.001	9.11269	718.699	8.88787	867.357	20.5899	77.4769
U223		11595.5	43.7147	6.51561	0.837933	0.0368879	0.130321	1.36559	1.16114	2.0267	0.0646494	1.49755	0.673802	789.698	10.1585	782.492	11.0694	762	31.9221	103.635	789.698	10.1585
U224		15833.6	54.4326	7.62085	0.374514	0.081103	0.136072	1.41767	1.23543	1.97168	0.0658782	1.3703	0.719017	822.413	10.9549	816.806	11.0782	801.566	29.0965	102.601	822.413	10.9549
U225		8880.9	41.4665	4.74868	0.516855	0.094371	0.107996	1.39451	0.916332	2.11854	0.0615659	1.59485	0.658242	661.097	8.76924	660.418	10.2958	658.1	34.5106	100.455	661.097	8.76924
U226		21074.8	101.158	10.4069	0.415925	0.0856317	0.0984773	1.63875	0.793395	2.02614	0.0584584	1.19154	0.808802	605.479	9.47608	593.096	9.11043	546.004	26.4284	110.893
U227		219390	88.699	45.3501	0.214232	0.00461582	0.482897	1.31826	10.8883	1.49993	0.163607	0.715537	0.878878	2539.87	27.7067	2513.64	14.0533	2492.52	13.7063	101.9	2492.52	13.7063
U228		3246.25	16.699	1.9301	0.498491	0.0412965	0.112946	1.5609	0.855922	3.77038	0.0549864	3.43211	0.41399	689.837	10.2182	627.894	17.6611	410.665	76.8853	167.981
U229		97377.9	216.321	41.837	0.416338	b.d.	0.186567	1.32382	1.93829	1.54113	0.075384	0.789049	0.85899	1102.75	13.431	1094.41	10.3495	1077.85	16.6096	102.31	1077.85	16.6096
U230		24074.4	101.539	12.1297	0.308759	0.0326661	0.119239	1.35298	1.03895	1.77287	0.0632224	1.14565	0.763157	726.184	9.30004	723.396	9.18584	714.763	24.7848	101.598	726.184	9.30004
U231		25651.8	121.219	14.8183	0.698667	0.0279685	0.110105	1.34402	0.926832	1.77446	0.0610782	1.15858	0.757426	673.36	8.60101	665.966	8.6785	641.023	25.3389	105.045	673.36	8.60101
U232		48667.9	259.006	25.2727	0.220282	0.0129415	0.0998989	1.34757	0.821114	1.61602	0.0596399	0.891949	0.833882	613.816	7.89683	608.67	7.41005	589.561	19.8811	104.114	613.816	7.89683
U233		49469.5	282.547	25.7793	0.125767	0.0120528	0.0961158	1.31932	0.779419	1.58149	0.0588397	0.872063	0.834228	591.606	7.46446	585.152	7.04502	560.188	19.5475	105.608	591.606	7.46446
U234		18942.7	119.228	13.5693	1.46476	0.0394173	0.08503	1.36189	0.677286	1.84458	0.0577955	1.24408	0.738318	526.077	6.88578	525.133	7.57141	521.031	27.6711	100.969	526.077	6.88578
U235		62639.8	196.692	28.4434	0.277746	0.026782	0.144274	1.35864	1.36346	1.61129	0.068572	0.866236	0.843198	868.788	11.0526	873.357	9.45706	884.962	18.548	98.1723	868.788	11.0526
U236		4330.57	26.7894	3.57665	2.29516	0.0539805	0.0875854	1.49545	0.703035	2.75537	0.0582424	2.31424	0.542739	541.241	7.76891	540.602	11.5554	537.908	50.8367	100.62	541.241	7.76891
U237		10622.1	29.8954	4.96147	0.442987	0.129016	0.158784	1.40143	1.53069	2.17872	0.069948	1.66817	0.643236	950.013	12.3896	942.775	13.3961	925.905	34.6103	102.604	950.013	12.3896
U238		34180.6	200.017	17.538	0.143269	0.0164523	0.0918694	1.3252	0.741171	1.67181	0.0585385	1.0192	0.792679	566.583	7.19428	563.088	7.23605	548.993	22.7179	103.204	566.583	7.19428
U239		185361	42.9567	28.8355	0.409333	0.0283037	0.575938	1.33223	18.0446	1.53266	0.227335	0.757757	0.869231	2932.16	31.4251	2992.12	14.8849	3032.66	14.1139	96.686	3032.66	14.1139
U240		14608.3	39.1805	7.41759	0.883811	0.0546674	0.162741	1.4086	1.61394	1.89596	0.0719587	1.26907	0.742946	971.991	12.7198	975.638	11.9049	983.858	26.3006	98.7938	971.991	12.7198
U241		90810.5	454.008	49.3304	0.55951	0.0101331	0.100963	1.36385	0.856462	1.59924	0.0615516	0.835162	0.852808	620.051	8.06939	628.189	7.50361	657.6	18.5004	94.29	620.051	8.06939
U242		24975.3	125.865	13.2488	0.203411	0.0236761	0.108558	1.3235	0.907875	1.69181	0.0606818	1.05384	0.782297	664.367	8.36253	655.927	8.18661	627.005	23.1778	105.959	664.367	8.36253
U243		12154.7	45.4174	6.54249	0.703618	0.0653525	0.129727	1.3881	1.15275	2.00291	0.0644762	1.44389	0.693044	786.306	10.2839	778.54	10.903	756.339	30.8305	103.962	786.306	10.2839
U244		21000.4	118.432	11.808	0.534273	0.0165884	0.0938331	1.32102	0.765187	1.80823	0.0591706	1.23474	0.730563	578.167	7.31178	576.998	7.96869	572.399	27.2437	101.008	578.167	7.31178
U245		54806.3	146	28.1359	0.810993	0.00404963	0.169425	1.33069	1.67412	1.59491	0.0716974	0.879195	0.834339	1008.94	12.4397	998.752	10.1612	976.448	18.5809	103.328
U246		27337	115.939	14.0526	0.363541	0.0297175	0.119055	1.34412	1.0349	1.71961	0.063073	1.07257	0.781641	725.121	9.22645	721.373	8.89355	709.738	23.2796	102.167	725.121	9.22645
U247		17984.4	92.6475	9.33525	0.356732	0.0518278	0.0988816	1.36199	0.822189	1.90434	0.0603323	1.33097	0.715205	607.851	7.90725	609.269	8.73458	614.543	29.113	98.9112	607.851	7.90725
U248		48989.5	243.119	22.6885	0.311919	0.00104258	0.0927689	1.35619	0.776368	1.62681	0.0607238	0.898464	0.833654	571.892	7.42818	583.409	7.23028	628.497	19.9027	90.9936	571.892	7.42818
U249		100681	78.1973	28.5806	0.452821	0.0270849	0.336405	1.34507	5.85938	1.5761	0.126382	0.821507	0.853417	1869.35	21.8495	1955.24	13.7348	2047.44	15.7083	91.3018	2047.44	15.7083
U255		76104.8	188.567	33.8009	0.469518	0.250564	0.168819	1.31838	1.73112	1.60154	0.0744047	0.909285	0.823196	1005.6	12.2871	1020.17	10.3308	1051.56	18.9877	95.6296	1051.56	18.9877
U256		9714.18	52.2869	5.84254	0.95743	0.0483034	0.094311	1.40274	0.785089	2.18465	0.0604019	1.67482	0.642089	580.983	7.79942	588.382	9.76418	617.033	36.4502	94.1575	580.983	7.79942
U257		52566.9	42.8198	19.5049	1.33225	0.0213657	0.352141	1.32824	5.53483	1.60847	0.114047	0.907163	0.82578	1944.81	22.3234	1906.02	13.8934	1864.06	17.3745	104.332	1864.06	17.3745
U258		15383.3	39.142	7.17705	0.50125	0.0478948	0.17323	1.39952	1.73894	1.92502	0.0728374	1.32176	0.727014	1029.89	13.3324	1023.07	12.4294	1008.52	27.2599	102.118	1008.52	27.2599
U259		7357.34	23.0463	3.47808	0.471415	0.0830986	0.143642	1.41693	1.36366	2.32118	0.0688842	1.83852	0.610437	865.222	11.4818	873.444	13.6105	894.346	38.259	96.7435	865.222	11.4818
U260		28295.8	71.5566	12.6451	0.473072	0.109186	0.166358	1.35112	1.6856	1.76809	0.0735199	1.14045	0.764166	992.014	12.4342	1003.1	11.2887	1027.41	23.5918	96.5549	1027.41	23.5918
U261		22529.8	117.655	10.8236	0.00576861	0.017227	0.100109	1.34099	0.825025	1.7718	0.0597984	1.15802	0.756855	615.045	7.87337	610.848	8.14344	595.313	25.5079	103.315	615.045	7.87337
U262		8602.62	32.1247	4.89359	0.833338	0.166323	0.133452	1.42061	1.17841	2.32678	0.0640719	1.84276	0.610549	807.526	10.791	790.573	12.7916	743.053	39.2506	108.677	807.526	10.791
U263		13638.5	52.5005	5.70692	0.378989	0.418297	0.103991	1.469	1.05836	2.26563	0.0738467	1.72485	0.648385	637.754	8.92661	733.013	11.839	1036.37	35.1886	61.5371
U264		393137	320.611	103.56	0.335449	0.374591	0.300807	1.42888	5.20698	1.63755	0.125601	0.799913	0.872574	1695.31	21.3198	1853.76	14.0054	2036.48	15.368	83.2469
U265		27790.2	91.7253	13.341	0.44148	0.0747199	0.138997	1.36032	1.32043	1.75843	0.0689295	1.11428	0.773598	838.987	10.7108	854.702	10.1768	895.704	23.5006	93.6678	838.987	10.7108
U266		19613.6	94.1565	12.3744	1.46306	0.159049	0.0965283	1.37251	0.832953	2.02316	0.0626123	1.4864	0.678399	594.031	7.79523	615.249	9.34467	694.13	32.0255	85.5793
U267		56996.1	173.754	26.0802	0.517804	0.00232581	0.140396	1.36153	1.35776	1.644	0.0701718	0.921406	0.828178	846.903	10.815	870.908	9.63116	932.463	19.5256	90.8243	846.903	10.815
U268		30530.5	112.839	15.6232	0.448001	0.0221412	0.133194	1.32532	1.19321	1.67215	0.065002	1.01961	0.792587	806.061	10.0513	797.448	9.25313	773.454	21.9714	104.216	806.061	10.0513
U269		20284.5	127.123	12.9216	0.880619	0.0151472	0.0886637	1.34893	0.711464	1.78696	0.0582239	1.17201	0.754876	547.629	7.08812	545.615	7.55186	537.213	26.0446	101.939	547.629	7.08812
U270		9355.85	46.2227	5.99046	1.23808	0.0365588	0.103556	1.44971	0.869988	2.09455	0.0609584	1.51178	0.692135	635.213	8.77616	635.561	9.90394	636.798	32.8575	99.751	635.213	8.77616
RM0 (n=14)		42846.7	289.999	26.2985	0.0248	b.d.	0.0981	0.974763	0.81255	0.926302	0.0601	0.61403	0.596532	603.264	5.60327	603.878	4.20684	606.191	13.3221	99.5302	603.264	5.60327
RM1 (n=7)		39450.4	217.138	20.0636	0.303126	b.d.	0.0924214	1.33681	0.750271	1.56618	0.0589029	0.650975	0.813621	569.841	7.28324	568.381	6.82399	562.547	14.0634	101.309	569.841	7.28324
RM2 (n=7)		17074.2	136.808	9.54913	0.390912	b.d.	0.0685229	1.58642	0.518814	2.26901	0.0549371	1.27967	0.72328	427.241	6.56274	424.35	7.83264	408.632	28.7739	104.66	427.241	6.56274
RM3 (n=7)		10766.2	23.4898	4.21699	0.293945	b.d.	0.176471	1.75905	1.81414	4.29268	0.0746	3.89709	0.652246	1047.62	17.0439	1050.53	28.3385	1056.38	78.651	99.2885	1056.38	78.651
RM0
A001	GJ1	44285.6	286.872	26.021	0.0246371	0.0215686	0.09815	0.4002	0.8099	0.640906	0.05987	0.5006	0.624429	603.551	2.32829	602.39	2.94071	598.026	11.774	100.924	603.551	2.32829
A002	GJ1	45817.9	295.445	26.8395	0.025054	0.0199215	0.09823	0.430911	0.816	0.656855	0.06027	0.495755	0.656023	604.051	2.50562	605.801	3.02504	612.351	11.6584	98.6447	604.051	2.50562
A040	GJ1	44912.9	290.845	26.2436	0.0247443	0.0214467	0.09756	0.370315	0.8124	0.605319	0.06043	0.47883	0.611768	600.072	2.14602	603.82	2.78555	617.912	11.3163	97.1129	600.072	2.14602
A041	GJ1	43637.6	284.557	25.788	0.0245542	0.0222292	0.09803	0.426582	0.8102	0.634743	0.05997	0.470027	0.672055	602.854	2.47618	602.558	2.91358	601.445	11.1631	100.234	602.854	2.47618
A080	GJ1	44494.9	294.208	26.6121	0.0250258	0.0187563	0.09783	0.339675	0.8111	0.677979	0.06016	0.58675	0.501011	601.687	1.97767	603.076	3.1102	608.298	13.494	98.9132	601.687	1.97767
A081	GJ1	43609.7	286.681	26.2285	0.024952	0.0177853	0.099	0.358584	0.8157	0.576757	0.05979	0.451737	0.621724	608.537	2.10758	605.661	2.66302	594.917	10.811	102.289	608.537	2.10758
A130	GJ1	43982.9	297.97	26.9146	0.0249685	0.0213349	0.09768	0.292683	0.8112	0.608599	0.06025	0.5336	0.480913	600.824	1.70954	603.113	2.7979	611.723	12.4148	98.2184	600.824	1.70954
A131	GJ1	42025.3	282.79	25.7496	0.0243362	0.0202285	0.0985	0.345161	0.8164	0.587767	0.06014	0.475745	0.587242	605.617	2.02131	606.013	2.71381	607.494	11.2685	99.6911	605.617	2.02131
A190	GJ1	42162.7	296.767	26.9225	0.0253972	0.0206386	0.09814	0.433074	0.811	0.676283	0.05996	0.519428	0.640374	603.5	2.5158	603.001	3.10228	601.125	12.1461	100.395	603.5	2.5158
A191	GJ1	40893.8	288.487	26.0222	0.0244422	0.0202112	0.09758	0.337998	0.8082	0.679249	0.06009	0.589183	0.497605	600.211	1.96355	601.417	3.10961	605.967	13.5475	99.0501	600.211	1.96355
A250	GJ1	40232.1	282.643	25.8877	0.0249643	0.0171294	0.09909	0.406747	0.8217	0.608956	0.06017	0.453194	0.667941	609.053	2.38623	608.989	2.81958	608.752	10.8237	100.049	609.053	2.38623
A251	GJ1	40111.8	284.6	25.7139	0.0243449	0.0189085	0.09774	0.373376	0.8111	0.676732	0.06021	0.564408	0.551735	601.173	2.16715	603.096	3.10466	610.333	13.0376	98.4992	601.173	2.16715
A271	GJ1	42384.4	299.135	27.0629	0.0252295	0.0116926	0.09792	0.391578	0.8077	0.615233	0.05986	0.47453	0.636471	602.183	2.27417	601.186	2.82107	597.427	11.257	100.796	602.183	2.27417
A272	GJ1	41302.9	288.991	26.1728	0.0245498	0.0182409	0.09795	0.378806	0.8131	0.629077	0.06023	0.502238	0.602162	602.382	2.2022	604.175	2.8938	610.905	11.7891	98.6048	602.382	2.2022
		42846.7	289.999	26.2985	0.0248	b.d.	0.0981	0.974763	0.81255	0.926302	0.0601	0.61403	0.596532	603.264	5.60327	603.878	4.20684	606.191	13.3221	99.5302	603.264	5.60327
RM1
B003	BB	41649.6	220.393	20.3729	0.307228	0.0204349	0.09236	1.31504	0.7505	1.62076	0.05896	0.947384	0.811372	569.457	7.17383	568.494	7.06606	564.645	21.133	100.852	569.457	7.17383
B042	BB	39537.6	210.462	19.245	0.296026	0.0328916	0.09156	1.33232	0.7405	1.64515	0.05868	0.965115	0.809847	564.772	7.21071	562.696	7.11729	554.31	21.5444	101.887	564.772	7.21071
B082	BB	39118.4	207.539	19.1328	0.294063	0.0668979	0.09222	1.33362	0.7466	1.63671	0.05874	0.94884	0.814814	568.633	7.26491	566.243	7.11427	556.656	21.1898	102.152	568.633	7.26491
B132	BB	40461.4	223.17	20.6024	0.307147	0.0121049	0.09227	1.32699	0.7496	1.63119	0.05895	0.948622	0.813509	568.966	7.23291	568.01	7.10686	564.187	21.1608	100.847	568.966	7.23291
B192	BB	39418.2	224.835	21.0052	0.305767	0.00656646	0.09348	1.32782	0.7596	1.62468	0.05896	0.936209	0.81728	576.099	7.32419	573.779	7.13215	564.6	20.8955	102.037	576.099	7.32419
B252	BB	37414.8	215.533	20.0033	0.307161	0.0128889	0.09294	1.34614	0.7529	1.66274	0.05878	0.976022	0.809589	572.88	7.38537	569.916	7.26205	558.109	21.7643	102.647	572.88	7.38537
B273	BB	38552.8	218.037	20.0836	0.304493	0.022457	0.09212	1.35962	0.7522	1.66022	0.05925	0.952769	0.81894	568.078	7.39944	569.528	7.24742	575.319	21.2128	98.7415	568.078	7.39944
		39450.4	217.138	20.0636	0.303126	b.d.	0.0924214	1.33681	0.750271	1.56618	0.0589029	0.650975	0.813621	569.841	7.28324	568.381	6.82399	562.547	14.0634	101.309	569.841	7.28324
RM2
C004	Temora	24766.7	188.759	12.7283	0.231181	0.0293977	0.06909	1.32273	0.5241	1.75139	0.05504	1.14793	0.755246	430.659	5.51516	427.854	6.12178	412.771	26.046	104.334	430.659	5.51516
C043	Temora	19871.9	153.501	11.231	0.585755	0.0433726	0.06802	1.32287	0.5156	1.75818	0.055	1.1581	0.752409	424.214	5.43588	422.224	6.08021	411.368	26.2761	103.123	424.214	5.43588
C083	Temora	13107.1	102.666	6.85383	0.237996	0.0372925	0.06827	1.38086	0.5216	1.92222	0.05543	1.33722	0.718369	425.714	5.69319	426.188	6.69655	428.748	30.1435	99.2925	425.714	5.69319
C133	Temora	8307.6	67.3439	4.83379	0.515727	0.105938	0.06798	1.38341	0.5094	2.27413	0.05438	1.80496	0.608324	423.955	5.68086	418.064	7.79839	385.689	40.7848	109.921	423.955	5.68086
C193	Temora	20745.4	172.783	11.8343	0.283352	0.0325354	0.06922	1.34944	0.5221	1.74458	0.05473	1.1057	0.773505	431.471	5.63661	426.556	6.08315	400.084	25.1686	107.845	431.471	5.63661
C253	Temora	13520	114.682	7.92349	0.378045	0.0439222	0.06812	1.3692	0.5139	1.91342	0.05474	1.33659	0.715577	424.817	5.63366	421.101	6.60174	400.805	30.2708	105.991	424.817	5.63366
C274	Temora	19200.8	157.924	11.4391	0.504327	0.0328012	0.06896	1.35231	0.525	1.8286	0.05524	1.23087	0.739532	429.86	5.62816	428.463	6.39839	420.958	27.8369	102.115	429.86	5.62816
		17074.2	136.808	9.54913	0.390912	b.d.	0.0685229	1.58642	0.518814	2.26901	0.0549371	1.27967	0.72328	427.241	6.56274	424.35	7.83264	408.632	28.7739	104.66	427.241	6.56274
RM3
D005	91500	11063.6	23.8056	4.26051	0.293298	0.110016	0.1772	1.3965	1.814	2.13006	0.07431	1.6084	0.655615	1051.43	13.56	1050.6	13.9612	1048.86	32.8032	100.245	1048.86	32.8032
D044	91500	10869.3	23.4175	4.17809	0.291554	0.0946271	0.1767	1.40025	1.814	2.14253	0.07448	1.62165	0.653549	1048.91	13.5663	1050.47	14.0417	1053.72	33.0443	99.5429	1053.72	33.0443
D084	91500	9926.3	22.1905	3.92042	0.289969	0.204946	0.175	1.39903	1.743	2.17686	0.07228	1.66777	0.64268	1039.35	13.4406	1024.48	14.0619	992.853	34.2629	104.683
D134	91500	10406.7	23.6733	4.25497	0.294912	0.11629	0.1781	1.45327	1.804	2.16626	0.07351	1.60645	0.670865	1056.41	14.1718	1046.92	14.1694	1027.17	32.8663	102.847	1027.17	32.8663
D194	91500	10587.4	23.5201	4.28267	0.297521	0.329488	0.1785	1.40851	1.868	2.17064	0.07593	1.65159	0.648895	1059	13.7671	1069.93	14.3746	1092.26	33.4568	96.9548	1092.26	33.4568
D254	91500	9927.47	23.3305	4.12509	0.294186	0.105832	0.1749	1.42994	1.81	2.08729	0.07509	1.52054	0.685069	1039.17	13.7349	1049.15	13.6708	1070	30.9612	97.1191	1070	30.9612
D275	91500	12582.7	24.4912	4.49717	0.296177	1.56475	0.1749	1.43053	1.846	2.34879	0.0766	1.8629	0.609052	1039.09	13.7396	1062.14	15.4873	1109.8	37.5523	93.6285	1109.8	37.5523
		10766.2	23.4898	4.21699	0.293945	b.d.	0.176471	1.75905	1.81414	4.29268	0.0746	3.89709	0.652246	1047.62	17.0439	1050.53	28.3385	1056.38	78.651	99.2885	1056.38	78.651
Sequence 4 (09.2021)
grain	sample	207Pba	Ub	Pbb	Thb	206Pbcc	206Pbd	±2s	207Pbd	±2s	207Pbd	±2s	rhoe	206Pb	±2s	207Pb	±2s	207Pb	±2s	concf	Preferred age	±2s
		(cps)	(ppm)	(ppm)	U	(%)	238U	(%)	235U	(%)	206Pb	(%)		238U	(Ma)	235U	(Ma)	206Pb	(Ma)	(%)	(Ma)	(Ma)
Sample Myr 8 (Myra 1 borehole, Middle-Late Miocene)
U006		207999	408.792	41.5902	0.496611	1.55935	0.0859	1.99613	1.74511	2.51862	0.147409	1.53588	0.792548	531.243	10.1831	1025.36	16.2725	2315.31	27.094	22.9448
U007		681342	215.239	136.616	0.719566	0.0418746	0.532155	1.58614	13.1781	1.99914	0.179684	1.21685	0.793411	2750.53	35.544	2692.49	18.9558	2649.21	21.2746	103.824	2649.21	21.2746
U008		138866	107.472	49.2044	1.74378	0.0191525	0.325197	1.58716	5.1656	2.0331	0.115257	1.2706	0.78066	1815.06	25.1263	1846.97	17.3411	1883.1	23.6141	96.3866	1883.1	23.6141
U009		24916.3	86.5438	9.9914	0.789265	1.60485	0.0978983	1.61603	0.980629	2.47968	0.0726814	1.88076	0.651709	602.08	9.29482	693.927	12.4749	1004.17	38.489	59.9579
U010		256383	86.9864	52.3376	0.996647	0.000838117	0.481606	1.59557	11.9905	2.02123	0.180651	1.24078	0.789406	2534.26	33.4619	2603.67	19.0259	2658.11	21.6385	95.3405	2658.11	21.6385
U011		23025	104.849	17.8321	2.89982	b.d.	0.106424	1.62538	0.934228	2.39711	0.0636953	1.76189	0.678059	651.946	10.0844	669.857	11.7649	730.576	37.6272	89.2373
U012		82381.5	179.524	31.8251	0.205998	0.182893	0.179233	1.57283	1.83815	2.04656	0.0744145	1.30943	0.768524	1062.78	15.421	1059.2	13.4779	1051.83	26.8508	101.042	1051.83	26.8508
U013		56045.4	166.515	18.248	0.167662	2.5436	0.106889	1.5923	0.928982	2.59281	0.0630621	2.04628	0.61412	654.655	9.9184	667.099	12.687	709.369	43.7598	92.2869	654.655	9.9184
U014		27950.2	115.621	13.3537	0.297361	0.0166887	0.116136	1.59662	1.00508	2.16208	0.0627952	1.45788	0.738464	708.287	10.7162	706.386	11.015	700.344	31.3936	101.134	708.287	10.7162
U015		100350	75.137	31.4873	1.13608	b.d.	0.341706	1.59542	5.45327	2.04644	0.115797	1.28161	0.779611	1894.87	26.2129	1893.27	17.6063	1891.51	23.7861	100.178	1891.51	23.7861
U016		12318.7	60.8789	6.10472	0.39733	0.0364277	0.0984822	1.64274	0.827945	2.41021	0.0610011	1.76367	0.681575	605.508	9.49958	612.471	11.0925	638.307	38.2222	94.8615	605.508	9.49958
U017		13840.1	69.0256	6.89556	0.463226	0.0573732	0.0964174	1.63609	0.815608	2.41826	0.0613791	1.78078	0.676556	593.379	9.28022	605.595	11.0381	651.579	38.5053	91.0679	593.379	9.28022
U018		8698.95	32.7964	4.34147	0.989248	0.0769026	0.111079	1.71245	1.03048	2.73702	0.0673139	2.13513	0.625662	679.009	11.0422	719.169	14.1127	846.565	44.6653	80.2075
U019		24933.5	89.4754	10.8833	0.360363	0.094946	0.11885	1.61222	1.08208	2.26815	0.0660628	1.59538	0.710809	723.939	11.0468	744.651	11.9799	807.426	33.7265	89.6601	723.939	11.0468
U020		105389	272.245	41.3409	0.488107	0.0184686	0.141992	1.59502	1.40199	2.04103	0.0716436	1.27346	0.78148	855.914	12.7927	889.779	12.1114	974.918	26.4219	87.7935
U021		22314.2	80.1384	12.6529	1.17377	0.0055833	0.130785	1.60609	1.17799	2.19916	0.0653546	1.50226	0.73032	792.342	11.9822	790.375	12.0893	784.829	31.9081	100.957	792.342	11.9822
U022		122261	88.8452	35.7878	0.803117	0.077453	0.346249	1.59195	5.61685	2.07721	0.117706	1.33435	0.766389	1916.66	26.4143	1918.69	17.9516	1920.88	24.6334	99.7808	1920.88	24.6334
U023		15217.2	49.0415	5.63607	0.608014	2.10837	0.100296	1.68087	0.956856	3.16322	0.069224	2.67967	0.531379	616.143	9.88254	681.666	15.7122	904.496	55.4398	68.1201
U024		20339.7	47.3394	5.45552	0.229918	5.15458	0.103647	1.74894	0.848819	3.68165	0.0594228	3.23972	0.475041	635.745	10.5935	624	17.1682	581.646	70.508	109.301	635.745	10.5935
U025		21627	84.4162	10.9139	0.688205	0.0123808	0.118132	1.62179	1.03401	2.22719	0.0635114	1.52649	0.728177	719.803	11.0522	720.932	11.5068	724.444	32.7155	99.3594	719.803	11.0522
U026		4602.05	18.804	2.5647	1.60063	0.424532	0.102113	1.75965	0.973759	3.50936	0.0691937	3.03632	0.501416	626.777	10.5152	690.4	17.5861	903.593	62.774	69.365
U027		17747.7	8.63699	2.15155	0.168551	33.4689	0.139031	2.58969	1.22482	10.4259	0.0639229	10.0992	0.248389	839.178	20.382	811.978	58.2829	738.13	213.78	113.69
U028		25646.8	96.9845	13.0908	0.804642	0.00454713	0.119817	1.60989	1.05806	2.1792	0.0640746	1.46873	0.738753	729.508	11.111	732.865	11.3866	743.143	31.4124	98.1651	729.508	11.111
U029		11796.5	33.7477	3.81499	0.316195	3.30256	0.104477	1.67678	0.969875	3.49073	0.0673581	3.06164	0.480351	640.592	10.2306	688.399	17.4574	847.93	63.8435	75.5477
U030		62202.1	21.3052	8.62492	1.15986	27.7469	0.208539	2.25759	2.34295	6.55304	0.081521	6.15187	0.344511	1221.03	25.121	1225.42	46.6418	1233.15	120.807	99.0171	1233.15	120.807
U031		31990.3	124.13	14.8858	0.286789	0.0101735	0.120908	1.59607	1.05446	2.13737	0.0632803	1.42159	0.746745	735.789	11.1053	731.089	11.15	716.708	30.5518	102.662	735.789	11.1053
U032		10579.9	22.9235	3.46283	1.5444	4.8457	0.102512	1.8738	1.20155	4.79633	0.0850475	4.41516	0.390674	629.113	11.2364	801.301	26.5854	1315.75	85.7726	47.814
U033		34651.9	116.539	15.0098	0.243467	0.0320437	0.130451	1.60649	1.2048	2.12762	0.0670133	1.39498	0.755062	790.437	11.9581	802.797	11.8177	837.249	29.4482	94.4088	790.437	11.9581
U034		15987.9	58.4045	8.67731	1.84095	0.0625473	0.105354	1.6505	1.11098	2.63671	0.0765157	2.05623	0.62597	645.709	10.1469	758.647	14.0996	1107.7	41.3951	58.293
U035		81902.3	59.149	23.6191	1.08042	0.0133941	0.321939	1.64311	5.41241	2.15997	0.121986	1.40201	0.760711	1799.19	25.8137	1886.82	18.5561	1984.68	25.6466	90.6539	1984.68	25.6466
U036		12439.5	44.0586	5.89351	0.518382	0.0583053	0.127271	1.62197	1.15107	2.32242	0.0656247	1.66218	0.698396	772.279	11.8121	777.75	12.6299	793.484	35.1863	97.3275	772.279	11.8121
U037		7971.03	29.9013	3.74119	0.377643	0.166879	0.12265	1.65892	1.08639	2.73419	0.0642707	2.17343	0.606731	745.798	11.6901	746.749	14.465	749.601	46.1521	99.4927	745.798	11.6901
U038		8621.68	461.825	2.47281	0.30022	6.58058	0.00467497	1.75947	0.0328514	5.40093	0.0509881	5.1063	0.325772	30.0666	0.528025	32.8205	1.74441
U039		56635	33.0834	15.8521	1.85682	0.15857	0.334993	1.65134	6.89844	2.31907	0.14942	1.62824	0.712071	1862.54	26.7309	2098.46	20.6156	2338.53	28.5767	79.6456
U045		10486.6	36.9727	4.84291	0.351584	0.0971813	0.129354	1.66067	1.17003	2.45268	0.0656312	1.80494	0.677083	784.18	12.2689	786.658	13.4383	793.693	38.1542	98.8015	784.18	12.2689
U046		27551.1	61.5211	7.88888	1.08879	0.094174	0.105649	1.65015	1.86016	4.99912	0.127755	4.71892	0.330087	647.429	10.1705	1067.04	33.0208	2066.52	83.4068	31.3295
U047		13700.1	57.397	6.34803	0.405573	0.0869712	0.10742	1.6671	0.918012	2.40921	0.0620096	1.73927	0.69197	657.745	10.4304	661.308	11.7172	673.478	37.4893	97.6638	657.745	10.4304
U048		278909	147.622	40.2323	0.754771	14.6002	0.161699	1.83801	2.24998	3.51286	0.100963	2.99364	0.523224	966.214	16.5004	1196.78	24.7072	1641.06	55.8413	58.8775
U049		105977	52.4076	25.4124	0.634382	0.182321	0.423616	1.61386	9.50259	2.09565	0.162766	1.33686	0.7701	2276.87	30.9813	2387.8	19.3212	2483.84	23.4622	91.6674	2483.84	23.4622
U050		87529.8	294.253	28.0702	0.450944	2.40827	0.0860354	1.76225	1.02925	2.55139	0.0868039	1.84502	0.6907	532.047	9.00399	718.554	13.149	1355.28	35.9676	39.2574
U051		46476.7	89.4318	16.9979	0.468791	0.264946	0.177309	1.6208	1.91621	2.15244	0.0784163	1.41632	0.75301	1052.25	15.7459	1086.75	14.38	1156.55	28.5536	90.9824	1156.55	28.5536
U052		120120	445.641	31.7578	0.384395	0.145726	0.0659377	1.67054	0.837975	2.14409	0.0922128	1.34402	0.77914	411.635	6.66522	618.027	9.93464	1470.92	26.0738	27.9849
U053		79249.9	106.731	25.3474	0.730641	3.50302	0.196742	1.65678	2.12172	2.65256	0.0782502	2.07151	0.624597	1157.79	17.5691	1155.9	18.3227	1152.34	41.4336	100.473	1152.34	41.4336
U054		56042.4	249.892	29.6009	1.32204	0.247514	0.0922726	1.59396	0.901687	2.5919	0.070905	2.04383	0.614977	568.964	8.68567	652.629	12.4864	953.757	42.0875	59.655
U055		13177	340.033	7.77543	0.799279	0.697143	0.0198316	1.66542	0.141865	3.15019	0.0519053	2.67397	0.528673	126.591	2.08882	134.704	3.97506	280.212	61.3549	45.177
U056		23314.7	48.2824	10.364	1.08692	0.101607	0.176532	1.61758	2.00217	2.34623	0.0822947	1.69948	0.689438	1048	15.656	1116.25	15.906	1251.66	33.6543	83.7287
U057		19155.1	38.479	5.52823	0.550797	5.40856	0.119593	1.81232	1.12567	4.38155	0.0682967	3.98917	0.413624	728.222	12.4856	765.689	23.5657	876.641	82.7158	83.0696
U058		120731	135.428	33.0481	0.234415	3.24362	0.228375	1.59527	3.51031	2.39047	0.111529	1.7803	0.667345	1325.98	19.1324	1529.54	18.9195	1823.67	32.8054	72.7093
U059		1.808e+06	680.789	322.374	0.250681	b.d.	0.441829	1.5705	10.5404	1.97884	0.173101	1.20389	0.793647	2358.82	31.0496	2483.48	18.4293	2587.1	21.1603	91.1763	2587.1	21.1603
U060		21173.4	68.0632	7.39425	0.617194	2.45453	0.0927272	1.65632	0.869434	2.86882	0.0680336	2.34238	0.577352	571.646	9.06578	635.26	13.5544	868.645	48.7862	65.8089
U061		25802.5	72.5314	10.3194	0.333793	0.502551	0.138619	1.60011	1.4529	2.37922	0.0760517	1.76078	0.672535	836.847	12.5657	911.075	14.3228	1095.53	35.6037	76.3873
U062		4133.07	18.5338	1.75408	0.00246652	0.0531596	0.102664	1.74834	0.896774	2.97251	0.063381	2.40398	0.588169	630.002	10.4988	650.002	14.2767	720.085	51.24	87.4899
U063		36650.9	110.847	16.5581	0.555029	0.0397469	0.139584	1.58084	1.32949	2.19088	0.0691103	1.51687	0.721556	842.311	12.4905	858.658	12.7096	901.106	31.6519	93.4753	842.311	12.4905
U064		13483.5	31.1701	5.23101	0.376087	0.825497	0.160527	1.66339	1.6295	2.66432	0.0736546	2.08128	0.624323	959.704	14.8411	981.664	16.778	1031.11	42.3599	93.0749	1031.11	42.3599
U065		19564.2	45.5614	7.53248	0.447174	0.255881	0.156585	1.6265	1.74485	2.3876	0.0808543	1.7479	0.681226	937.768	14.2041	1025.26	15.4268	1217.02	34.7546	77.0544
U066		16380.3	47.6393	8.19834	0.844555	0.207464	0.152281	1.62158	1.4388	2.33613	0.0685568	1.68166	0.69413	913.736	13.8234	905.221	14.0078	884.503	35.1012	103.305	913.736	13.8234
U067		21592.2	109.296	11.3964	0.782776	0.00916972	0.0932029	1.62105	0.807355	2.21698	0.0628534	1.51235	0.731196	574.452	8.91458	600.969	10.064	702.318	32.531	81.7937
U068		22902.3	79.1755	11.1492	0.530819	0.0521003	0.132796	1.61235	1.19908	2.20991	0.0655176	1.5113	0.7296	803.794	12.1921	800.161	12.2473	790.058	32.0703	101.739	803.794	12.1921
U069		404332	95.7957	38.0042	1.36816	47.4462	0.113963	4.53843	1.95606	6.97028	0.124541	5.29031	0.651112	695.721	29.933	1100.53	46.8387	2021.49	93.9338	34.4163
U070		129582	76.4718	24.5064	0.670903	2.33655	0.262502	1.75847	4.94288	2.52197	0.136629	1.80779	0.697261	1502.63	23.5834	1809.61	21.3342	2184.12	32.0514	68.7979
U071		106482	298.794	26.784	0.601297	2.03828	0.0714933	2.1591	0.780625	2.79225	0.0792266	1.77059	0.773245	445.146	9.28985	585.84	12.4359	1176.91	35.3912	37.8232
U072		81039.8	248.133	28.8622	0.638208	3.08878	0.101915	1.65541	1.2425	2.84169	0.088461	2.30972	0.582545	625.624	9.87563	820.016	15.9969	1391.65	44.6335	44.9555
U073		4120.73	8.3905	1.1558	0.322372	6.4106	0.121309	1.95593	1.13792	5.26092	0.0680636	4.88382	0.371785	738.092	13.6465	771.523	28.4372	869.559	101.321	84.8811
U074		43378.6	210.463	22.1501	0.793495	0.00712957	0.0936085	1.59669	0.861321	2.13336	0.0667643	1.41486	0.748438	576.843	8.81573	630.844	10.0331	829.491	29.8915	69.5418
U075		8279.64	27.5824	4.90234	1.7226	0.12967	0.129973	1.70052	1.22051	2.96761	0.0681367	2.43207	0.573027	787.713	12.6162	810.009	16.5716	871.785	50.6118	90.3564	787.713	12.6162
U076		44309.3	246.136	14.6142	0.39522	0.0108802	0.0561916	1.89413	0.474665	2.34197	0.0612928	1.37736	0.808775	352.423	6.49889	394.406	7.659	648.56	29.941	54.3393
U077		22383.1	89.1008	10.8908	0.288693	0.00965226	0.123975	1.61399	1.07223	2.17924	0.0627548	1.46428	0.74062	753.402	11.4832	739.833	11.4605	698.974	31.5353	107.787	753.402	11.4832
U078		4795.93	13.7784	1.69639	1.37325	0.483093	0.0933548	1.85022	1.33128	4.09608	0.103473	3.65439	0.451704	575.348	10.1886	859.439	23.7578	1686.5	67.6678	34.1149
U079		21812.4	97.8434	10.7513	0.631422	0.0527439	0.101011	1.61069	0.911812	2.2664	0.0654982	1.59444	0.710682	620.333	9.53172	658.021	10.9847	789.437	33.8	78.5792
U085		49900.5	136.368	21.5367	0.989678	0.0130328	0.130931	1.61138	1.31734	2.12819	0.0730041	1.3902	0.757159	793.176	12.0335	853.346	12.2979	1013.15	28.6071	78.2878
U086		194434	99.8883	34.8623	0.588763	0.552341	0.288027	1.81033	6.02576	2.36532	0.1518	1.52231	0.765365	1631.66	26.1113	1979.57	20.6426	2365.54	26.7486	68.9763
U087		615.302	19.6738	0.142909	0.841149	12.7949	0.00516136	4.55828	0.0410959	33.3209	0.0577735	33.0077	0.136799	33.1867	1.50896	40.8935	13.3554
U088		13684.6	51.7611	6.7366	0.548192	0.00856825	0.124017	1.63098	1.11498	2.36753	0.0652348	1.71612	0.688897	753.646	11.6075	760.569	12.6837	780.972	36.378	96.501	753.646	11.6075
U089		3831.1	10.4324	1.22768	0.767078	1.41462	0.100313	1.89308	1.29199	4.20243	0.0934541	3.75189	0.450473	616.241	11.1306	842.181	24.0603	1496.26	71.1787	41.1856
U090		64741	269.7	31.1404	0.361078	0.0018703	0.114143	1.58717	0.978049	2.06308	0.0621737	1.31803	0.769319	696.762	10.4887	692.604	10.3686	679.129	28.5462	102.596	696.762	10.4887
U091		38733.3	153.851	19.2078	0.475732	0.00264384	0.120541	1.59755	1.07045	2.10184	0.0644358	1.36585	0.760074	733.675	11.0854	738.962	11.0454	755.018	29.2103	97.1733	733.675	11.0854
U092		8010.64	39.5917	5.35092	1.67228	0.0269965	0.101684	1.66613	0.868247	2.60722	0.0619559	2.0054	0.639044	624.272	9.91904	634.615	12.3107	671.626	43.1557	92.9494	624.272	9.91904
U093		121837	28.4724	23.2089	1.45861	b.d.	0.595283	1.62246	17.8137	2.06673	0.217133	1.28024	0.785034	3010.8	39.0613	2979.73	19.9729	2958.82	21.8367	101.757	2958.82	21.8367
U094		19989.1	65.4174	9.42565	0.481561	0.169975	0.136704	1.62203	1.25796	2.26894	0.0667696	1.58655	0.714882	826	12.5828	826.991	12.8475	829.657	33.4299	99.5591	826	12.5828
Sample Myr 16 (Myra 1 borehole, Early Miocene)
U095		23992.9	115.655	11.8945	0.322771	0.00417995	0.103087	1.5976	0.855445	2.16156	0.060212	1.45602	0.739098	632.474	9.63049	627.633	10.1281	610.229	31.8047	103.645	632.474	9.63049
U096		42183.5	141.723	20.0027	0.450882	0.000349458	0.136753	1.5848	1.23792	2.11237	0.0656825	1.39662	0.750245	826.274	12.2982	817.937	11.8775	795.33	29.6684	103.891	826.274	12.2982
U097		11585.7	51.6092	7.80602	1.43596	1.49516	0.115793	1.64109	0.783267	4.37996	0.0490817	4.06089	0.374682	706.307	10.9852	587.346	19.5382	150.683	95.2574	468.735
U098		38989.6	116.659	18.8735	0.554391	0.0202621	0.152681	1.59545	1.44001	2.15366	0.0684346	1.44665	0.740809	915.974	13.6319	905.726	12.9204	880.815	30.3127	103.992	915.974	13.6319
U099		409691	1016.63	34.614	0.0579608	1.04175	0.0313577	11.2911	0.469886	11.3658	0.108728	1.30086	0.993429	199.04	22.1306	391.11	36.8935	1777.4	24.4103	11.1984
U100		5311.93	22.6059	2.63953	0.475773	0.0776579	0.112449	1.6984	0.950219	2.91067	0.0613145	2.36378	0.583507	686.953	11.0732	678.217	14.4074	649.32	50.9698	105.796	686.953	11.0732
U101		73241.7	172.609	33.1744	0.882277	b.d.	0.166981	1.60872	1.70432	2.0766	0.0740591	1.31313	0.774688	995.455	14.8484	1010.15	13.3063	1042.17	26.9602	95.5175	1042.17	26.9602
U102		11644	53.9003	5.59623	0.299207	0.0224313	0.10454	1.64332	0.887769	2.43794	0.0616188	1.80086	0.674059	640.958	10.0321	645.17	11.6497	659.942	38.8808	97.1234	640.958	10.0321
U103		9305.02	29.059	5.50574	1.99074	0.156425	0.131227	1.67899	1.33123	2.69491	0.0736079	2.10797	0.623023	794.864	12.5629	859.418	15.6367	1029.83	42.9038	77.1842
U104		71029.2	57.7721	23.7896	1.25705	b.d.	0.326508	1.61521	5.08924	2.08653	0.113097	1.32087	0.774113	1821.43	25.6475	1834.31	17.7508	1848.96	24.5791	98.5114	1848.96	24.5791
U105		37871.2	56.9999	11.2811	0.663219	2.61453	0.168032	1.63179	2.26921	2.50551	0.0979887	1.90128	0.65128	1001.26	15.1423	1202.77	17.6776	1585.36	35.9683	63.1568
U106		35400.8	89.3417	21.2773	2.06746	b.d.	0.167769	1.59519	1.66518	2.10942	0.0720184	1.38022	0.756224	999.807	14.7833	995.351	13.3993	985.546	28.5198	101.447	999.807	14.7833
U107		77263.1	262.48	38.776	0.742139	0.00205929	0.132923	1.5858	1.21432	2.04268	0.0662871	1.28755	0.776334	804.516	12.0018	807.174	11.3875	814.514	27.3349	98.7725	804.516	12.0018
U108		55820.1	203.828	25.5583	0.281215	b.d.	0.126954	1.58803	1.13397	2.082	0.0648108	1.34643	0.762745	770.467	11.5397	769.643	11.2459	767.255	28.7521	100.419	770.467	11.5397
U109		15041.9	51.3936	9.92227	2.07701	0.00362875	0.134174	1.61538	1.21062	2.3602	0.065469	1.72078	0.684424	811.632	12.3268	805.478	13.1356	788.5	36.4327	102.934	811.632	12.3268
U110		15911.1	44.1636	7.71156	0.865154	0.00265695	0.153474	1.63378	1.49265	2.33176	0.0705699	1.6637	0.700663	920.405	14.0219	927.398	14.1919	944.06	34.4265	97.4944	920.405	14.0219
U111		84213.4	325.431	34.1237	0.909418	0.978316	0.0846322	1.61279	0.812021	2.32356	0.0696187	1.67267	0.694104	523.713	8.11725	603.587	10.5807	916.203	34.752	57.1612
U112		24040.4	118.571	11.7047	0.30949	0.00305315	0.0993011	1.60851	0.833075	2.1949	0.0608729	1.49341	0.732839	610.312	9.37221	615.317	10.1372	633.779	32.482	96.2972	610.312	9.37221
U113		24473.9	116.036	12.6975	0.39624	0.0077908	0.108008	1.58786	0.90381	2.18406	0.0607179	1.49961	0.727021	661.167	9.98422	653.762	10.5374	628.286	32.6426	105.233	661.167	9.98422
U114		76995.1	185.979	31.158	0.453516	0.00549999	0.159364	1.59147	1.62869	2.05195	0.0741554	1.29527	0.775589	953.242	14.1114	981.354	12.9263	1044.79	26.5964	91.2376	1044.79	26.5964
U115		42177.7	169.538	19.8551	0.677814	b.d.	0.105912	1.60391	0.963194	2.11728	0.065988	1.38215	0.757534	648.96	9.90807	684.95	10.558	805.052	29.326	80.6109
U116		467.096	2.31288	0.211433	0.00736697	0.292895	0.0988411	2.86967	0.811126	8.01881	0.0595449	7.48774	0.357868	607.614	16.6432	603.085	36.4676	586.1	162.559	103.671	607.614	16.6432
U117		71374.5	207.086	35.598	1.00313	b.d.	0.145831	1.5694	1.42188	2.04497	0.0707469	1.31107	0.767442	877.55	12.8845	898.151	12.2059	949.189	27.2757	92.4527	877.55	12.8845
U118		28870.1	124.72	14.2801	0.608566	b.d.	0.112394	1.59811	1.00321	2.2275	0.0647651	1.55171	0.717446	686.638	10.4155	705.438	11.3371	765.769	33.0324	89.6665	705.438
U119		203780	29.8032	25.9476	0.489631	0.0421782	0.706558	1.60937	28.6437	2.0392	0.294155	1.25231	0.789215	3445.47	42.9932	3441.39	20.1436	3439.01	20.9138	100.188	3439.01	20.9138
U120		5425.87	14.5771	1.84869	0.427552	3.13626	0.114558	1.80344	1.10994	4.0128	0.070302	3.58472	0.449421	699.165	11.9551	758.145	21.4404	936.264	73.6776	74.676
U121		15810.7	72.3337	9.87974	1.44687	0.030659	0.104626	1.63133	0.885629	2.34357	0.0614197	1.68259	0.696086	641.46	9.96643	644.018	11.185	652.998	36.4054	98.2332	641.46	9.96643
U122		9218.17	31.5741	5.211	1.20598	0.0160678	0.135266	1.66065	1.22487	2.52089	0.0657049	1.89661	0.658754	817.835	12.7627	812.002	14.1027	796.046	40.048	102.737	817.835	12.7627
U123		35422.3	111.896	17.5394	0.650824	0.0039149	0.144952	1.58477	1.34878	2.13257	0.0675168	1.42701	0.743128	872.602	12.9421	867.031	12.4486	852.822	30.0365	102.319	872.602	12.9421
U124		12592.4	29.9282	5.9394	0.725977	0.0111522	0.180725	1.64546	1.82418	2.41103	0.0732395	1.76225	0.682472	1070.93	16.246	1054.19	15.829	1019.68	36.0236	105.027	1019.68	36.0236
U125		28440.3	76.1205	14.3584	1.13485	0.000975933	0.156834	1.59922	1.54669	2.15117	0.0715576	1.43876	0.743419	939.159	13.9854	949.174	13.2814	972.469	29.7501	96.5748	939.159	13.9854
U126		18623.8	42.8683	9.67831	1.41888	0.0106328	0.176695	1.60731	1.80989	2.2589	0.074323	1.5872	0.711545	1048.89	15.569	1049.04	14.791	1049.35	32.3786	99.9568	1049.35	32.3786
U127		33036.4	111.665	14.7256	0.143328	0.0156284	0.137691	1.59184	1.25248	2.12574	0.0660026	1.40882	0.748844	831.592	12.4273	824.525	12.015	805.515	29.875	103.237	831.592	12.4273
U128		5165.55	15.2566	1.99526	0.175639	0.761354	0.132286	1.75689	1.25606	3.13304	0.0688951	2.59409	0.560762	800.895	13.2388	826.134	17.7204	894.671	53.7639	89.5183	800.895	13.2388
U129		36003.7	128.386	17.5235	0.512886	0.00334955	0.130015	1.59926	1.17015	2.1357	0.0653046	1.41548	0.748822	787.949	11.8692	786.715	11.7051	783.219	30.1144	100.604	787.949	11.8692
U135		18675.9	78.6704	9.23033	0.262474	0.0166068	0.119398	1.6041	1.02802	2.2203	0.0624742	1.53512	0.72247	727.098	11.0365	717.939	11.4385	689.422	33.0778	105.465	727.098	11.0365
U136		3751.93	9.44781	2.01377	1.1252	0.181316	0.180011	1.89376	1.74927	3.572	0.0705101	3.02867	0.530168	1067.04	18.632	1026.89	23.0876	942.323	62.2461	113.235
U137		165149	66.9354	40.9157	1.4342	b.d.	0.458803	1.5831	10.2239	2.02842	0.161691	1.26817	0.780463	2434.27	32.1228	2455.25	18.8353	2472.66	22.3709	98.4473	2472.66	22.3709
U138		41710.2	93.8805	16.7275	0.279432	0.00675684	0.178354	1.58922	1.83673	2.07971	0.0747232	1.34149	0.764152	1057.98	15.5167	1058.69	13.6919	1060.16	27.454	99.7941	1060.16	27.454
U139		247921	219.743	70.6914	0.719585	b.d.	0.279726	1.63412	4.33473	2.0543	0.112441	1.24492	0.79546	1589.98	23.0416	1699.99	16.9884	1838.42	23.2715	86.4861
U140		42168.3	185.743	21.5174	0.405052	b.d.	0.115438	1.59363	0.990363	2.09555	0.06225	1.36076	0.760482	704.253	10.6385	698.906	10.5981	681.747	29.4354	103.301	704.253	10.6385
U141		146422	54.4535	33.0565	1.21943	0.00271384	0.472057	1.60048	10.9943	2.04797	0.168992	1.27775	0.781495	2492.58	33.1124	2522.65	19.1381	2546.93	22.4	97.866	2546.93	22.4
U142		18506.5	58.5576	8.82577	0.562947	0.00781981	0.141912	1.60983	1.32981	2.2873	0.0679928	1.62487	0.703811	855.468	12.905	858.797	13.2692	867.402	34.026	98.6241	855.468	12.905
U143		46779	171.048	23.156	0.629148	0.00433925	0.12543	1.58394	1.1229	2.08407	0.0649584	1.35444	0.760019	761.74	11.3872	764.363	11.2053	772.041	28.8976	98.6657	761.74	11.3872
U144		42555.4	105.567	18.7914	0.522813	0.00363725	0.168431	1.58561	1.67665	2.10665	0.0722292	1.38701	0.752669	1003.46	14.7442	999.71	13.4162	991.492	28.6317	101.207
U145		4400.47	22.6085	2.90578	1.57045	0.0117584	0.0985279	1.73626	0.814762	2.84074	0.060002	2.24838	0.6112	605.776	10.044	605.122	12.9566	602.675	48.8739	100.515	605.776	10.044
U146		31753	151.548	15.8862	0.26709	0.0080736	0.106704	1.58915	0.890082	2.18432	0.0605263	1.49862	0.727524	653.577	9.88332	646.413	10.4539	621.472	32.6572	105.166	653.577	9.88332
U147		68269.1	169.238	27.63	0.132796	0.00333218	0.170141	1.57355	1.69126	2.05377	0.0721268	1.31982	0.766175	1012.89	14.7591	1005.24	13.1228	988.604	27.2979	102.456
U148		19407.9	110.222	12.0539	1.00447	b.d.	0.0940155	1.60571	0.754504	2.24323	0.0582313	1.56646	0.715801	579.241	8.9007	570.835	9.80285	537.492	34.5748	107.768	579.241	8.9007
U149		253970	82.1133	57.8365	1.18047	0.0206758	0.55397	1.66437	13.7335	2.06976	0.179883	1.23036	0.804135	2841.66	38.2784	2731.51	19.6775	2651.04	21.4849	107.19	2651.04	21.4849
U150		200118	124.846	55.3774	0.853103	b.d.	0.376861	1.57439	6.62552	2.00023	0.127565	1.23378	0.787106	2061.6	27.8013	2062.75	17.7022	2063.9	22.5758	99.889	2063.9	22.5758
U151		6221.03	24.7752	3.20283	0.604329	0.0482439	0.121125	1.74111	1.06243	2.81223	0.0636443	2.20844	0.619119	737.034	12.1326	735.018	14.7181	728.877	47.0425	101.119	737.034	12.1326
U152		53509.8	130.539	26.9942	1.11314	b.d.	0.173075	1.59297	1.77272	2.09841	0.0743193	1.36593	0.759132	1029.03	15.1608	1035.52	13.6406	1049.24	27.9804	98.0734	1049.24	27.9804
U153		48352	128.87	23.0535	0.783008	0.00147341	0.160558	1.58076	1.58628	2.08648	0.0716871	1.36183	0.75762	959.877	14.1071	964.837	13.0107	976.153	28.1891	98.3326	959.877	14.1071
U154		8139.28	29.5798	5.46986	2.00531	0.0194179	0.130679	1.66837	1.16631	2.61331	0.0647593	2.01146	0.638412	791.737	12.4374	784.916	14.2961	765.579	42.6426	103.417	791.737	12.4374
U155		12438.3	30.5612	6.78532	1.42875	0.00885167	0.174869	1.66341	1.76492	2.42674	0.0732327	1.76695	0.685451	1038.88	15.97	1032.65	15.7444	1019.49	36.1189	101.902	1019.49	36.1189
U156		16395.1	79.2581	8.77669	0.610824	0.0821902	0.102942	1.62235	0.870328	2.42299	0.0613454	1.79969	0.669565	631.63	9.76707	635.745	11.4566	650.402	38.9155	97.1137	631.63	9.76707
U157		15131.2	54.4431	7.92446	0.692625	b.d.	0.134061	1.63062	1.20217	2.2941	0.0650668	1.61367	0.710791	810.991	12.4338	801.589	12.7279	775.55	34.2731	104.57	810.991	12.4338
U158		192820	65.1322	41.3331	0.994212	b.d.	0.509349	1.59478	12.5188	2.02909	0.178336	1.25454	0.785958	2653.85	34.7223	2644.14	19.1635	2636.71	21.8879	100.65	2636.71	21.8879
U159		74854.1	360.283	36.7655	0.3313	0.0108735	0.101579	1.59471	0.85983	2.06945	0.0614188	1.31891	0.770596	623.658	9.48545	630.03	9.72401	652.967	28.6816	95.5114	623.658	9.48545
U160		91836.3	54.8617	22.1081	0.33793	0.010947	0.379395	1.59132	7.12542	2.04528	0.136274	1.28486	0.778045	2073.46	28.2367	2127.23	18.2689	2179.59	23.1984	95.1305	2179.59	23.1984
U161		30992.4	145.996	15.5655	0.31742	0.0043443	0.106901	1.59152	0.894502	2.13633	0.0607146	1.42513	0.744976	654.726	9.91459	648.785	10.2515	628.168	31.0552	104.228	654.726	9.91459
U162		12578.9	45.8087	6.57593	0.820004	0.0360533	0.127837	1.64969	1.17256	2.51803	0.0665542	1.90236	0.655151	775.512	12.0611	787.844	13.8096	822.914	40.0009	94.2397	775.512	12.0611
U163		19049.1	60.3213	10.0783	0.926443	0.00617094	0.146233	1.61971	1.36987	2.26991	0.0679712	1.59029	0.713556	879.815	13.329	876.106	13.336	866.745	33.3199	101.508	879.815	13.329
U164		8678.12	26.5351	4.42755	0.944064	0.0303435	0.144089	1.77644	1.37719	2.55722	0.0693517	1.83948	0.694674	867.745	14.4299	879.241	15.0547	908.292	38.1981	95.536	867.745	14.4299
U165		17137.5	39.8548	8.09482	0.85035	0.0143453	0.178453	1.61436	1.82491	2.28464	0.0742014	1.6166	0.706617	1058.52	15.7693	1054.45	15.0031	1046.04	32.9799	101.192	1046.04	32.9799
U166		37626.2	138.945	22.8249	1.70872	b.d.	0.123424	1.59962	1.16859	2.14507	0.0686997	1.42918	0.745718	750.241	11.3361	785.983	11.7491	888.808	29.9206	84.4099
U167		11129.4	49.6901	5.39347	0.229827	0.0373302	0.111249	1.62626	0.951217	2.34945	0.0620411	1.69564	0.692188	679.995	10.5015	678.736	11.6389	674.563	36.5572	100.805	679.995	10.5015
U168		160951	639.115	28.3397	0.196252	5.77011	0.0352391	2.74123	0.299118	3.85627	0.0615901	2.71228	0.71085	223.255	6.01635	265.711	9.01733	658.943	58.3344	33.8808
U169		50187.3	115.565	22.2215	0.566368	0.00197462	0.180325	1.58686	1.85316	2.08024	0.0745677	1.3451	0.762822	1068.75	15.6387	1064.55	13.7383	1055.97	27.5415	101.21	1055.97	27.5415
U170		8896.04	43.8675	5.14083	0.983825	0.0812383	0.100996	1.67019	0.884138	2.85547	0.0635198	2.31607	0.584907	620.244	9.88205	643.215	13.6125	724.728	49.3456	85.583
U171		12890	34.2371	5.47665	0.268453	0.0517445	0.160914	1.63866	1.57673	2.36748	0.0710979	1.70873	0.692155	961.853	14.6511	961.08	14.7242	959.312	35.2603	100.265	961.853	14.6511
U172		24232.3	14.6137	3.92601	1.76876	23.6289	0.128489	2.30917	1.6936	6.43422	0.0956397	6.00557	0.358889	779.241	16.9541	1006.12	41.0831	1539.86	113.079	50.6047
U173		16655	40.0508	7.42148	0.638768	0.0514003	0.169799	1.61737	1.74805	2.29637	0.0746986	1.63016	0.704317	1011	15.1436	1026.44	14.8484	1059.5	33.1864	95.4227	1059.5	33.1864
U174		57667.9	44.7582	18.3282	0.982094	0.0127652	0.342163	1.61547	5.46669	2.10529	0.115927	1.35001	0.767336	1897.07	26.5681	1895.38	18.117	1893.53	24.9758	100.187	1893.53	24.9758
U175		136426	90.656	37.6849	0.586935	0.00599996	0.374863	1.57812	6.38659	2.01824	0.12362	1.2581	0.781929	2052.24	27.7595	2030.43	17.7722	2008.33	23.1103	102.187	2008.33	23.1103
U176		9259.62	40.5091	5.05002	0.69706	0.0405922	0.114135	1.63501	0.97601	2.50264	0.0620485	1.89472	0.653314	696.715	10.8038	691.557	12.5602	674.817	40.7815	103.245	696.715	10.8038
U177		13855.4	32.8592	6.04782	0.497282	0.0241731	0.175116	1.63489	1.78224	2.3665	0.0738471	1.71098	0.690848	1040.24	15.7153	1039	15.4086	1036.38	34.9112	100.372	1036.38	34.9112
U178		28450.3	155.284	21.9859	1.72558	0.181057	0.108764	1.59791	0.906785	2.38288	0.0604944	1.76771	0.67058	665.563	10.1108	655.347	11.5149	620.335	38.4198	107.291	665.563	10.1108
U179		15104.5	80.7445	8.06969	0.423548	0.013396	0.0979449	1.61268	0.80559	2.31569	0.0596797	1.66183	0.696416	602.354	9.27961	599.977	10.4986	591.005	36.3249	101.92	602.354	9.27961
U180		9490.24	54.2818	5.27414	0.601592	0.0499501	0.0911378	1.6224	0.743722	2.54645	0.0592115	1.96272	0.63712	562.263	8.7408	564.575	11.0347	573.904	42.9255	97.9716	562.263	8.7408
U181		156672	107.781	47.0297	1.02385	b.d.	0.360557	1.58318	6.05582	2.01759	0.121869	1.25068	0.784689	1984.81	27.067	1983.91	17.6345	1982.96	23.0389	100.093	1982.96	23.0389
U182		15345.4	34.8415	6.64831	0.454064	0.0332667	0.183337	1.62944	1.87751	2.2938	0.0743067	1.61444	0.71037	1085.18	16.2845	1073.19	15.2142	1048.9	32.9234	103.458	1048.9	32.9234
U183		6487.9	32.6419	3.47127	0.824209	0.355593	0.0928388	1.68921	0.80903	3.02015	0.0632309	2.50358	0.559312	572.304	9.25576	601.91	13.7205	715.05	53.3886	80.037
U184		62357	261.069	31.2918	0.450188	b.d.	0.116203	1.58608	1.01787	2.05913	0.0635575	1.31316	0.770266	708.675	10.6511	712.842	10.5578	725.986	28.2383	97.6155	708.675	10.6511
U185		42678.9	114.985	20.0358	1.23222	b.d.	0.154079	1.59308	1.61666	2.14669	0.0761322	1.43887	0.742113	923.789	13.7198	976.694	13.4833	1097.65	29.2298	84.1607
U186		123867	107.377	47.6789	1.86381	b.d.	0.31455	1.58129	4.81356	2.01822	0.111038	1.25409	0.783506	1763.06	24.4099	1787.27	17.0112	1815.66	23.4875	97.1029	1815.66	23.4875
U187		41053.1	195.431	22.9414	0.774364	b.d.	0.105934	1.61565	0.894254	2.1048	0.0612521	1.34902	0.767603	649.089	9.9824	648.652	10.099	647.132	29.3465	100.302	649.089	9.9824
U188		3811.77	18.6433	1.90891	0.360685	0.134309	0.101735	1.74916	0.843389	3.22377	0.060152	2.70797	0.542583	624.571	10.4176	621.014	14.9823	608.073	58.731	102.713	624.571	10.4176
U189		20943.2	102.89	10.5706	0.296519	0.0147045	0.103533	1.60246	0.865294	2.25654	0.0606427	1.58874	0.710142	635.081	9.69766	633.009	10.6376	625.614	34.5598	101.513	635.081	9.69766
U195		99006.6	60.1357	29.8154	1.18298	b.d.	0.39839	1.60769	7.18717	2.05576	0.130901	1.28121	0.782039	2161.62	29.5483	2134.91	18.3817	2109.3	23.2846	102.48	2109.3	23.2846
U196		6786.37	22.6023	3.66349	0.938361	0.225062	0.139	1.68799	1.28909	2.86134	0.0672918	2.3104	0.58993	839.004	13.287	840.892	16.3713	845.882	48.2962	99.1868	839.004	13.287
U197		25361	67.5322	11.2074	0.428701	0.00298674	0.160463	1.60444	1.59872	2.18791	0.0722924	1.48752	0.73332	959.348	14.3108	969.711	13.6829	993.27	30.6392	96.5848	959.348	14.3108
U198		24572.4	64.9521	10.62	0.452394	0.00754185	0.158232	1.63075	1.58871	2.21431	0.0728528	1.49794	0.736459	946.943	14.3706	965.793	13.8141	1008.95	30.7788	93.8545	1008.95	30.7788
U199		17302.6	42.1617	8.11257	0.788691	0.0517685	0.170523	1.6243	1.77064	2.28493	0.0753426	1.60703	0.710875	1014.99	15.2638	1034.75	14.8437	1076.75	32.6462	94.2643	1076.75	32.6462
U200		27929	43.6005	14.8236	2.21746	b.d.	0.234234	1.63393	2.89432	2.21348	0.0896582	1.49325	0.73817	1356.65	20.0027	1380.43	16.7304	1417.4	29.0441	95.7141	1417.4	29.0441
U201		55724.1	129.843	24.8825	0.559556	0.000643447	0.179775	1.58294	1.85104	2.06425	0.0747105	1.32493	0.766835	1065.74	15.5598	1063.8	13.6275	1059.82	27.1275	100.559	1059.82	27.1275
U202		397090	408.686	116.935	0.56271	0.00261632	0.25774	1.60075	3.93944	2.021	0.110904	1.23371	0.792057	1478.27	21.1609	1621.82	16.4035	1813.47	23.1342	81.5161
U203		232867	68.7986	41.2261	0.28552	0.00106347	0.54696	1.57405	14.5856	2.0011	0.193492	1.23562	0.786593	2812.52	35.9083	2788.6	19.1094	2771.34	21.3972	101.486	2771.34	21.3972
U204		43699.4	246.526	22.6921	0.323469	0.108397	0.0914238	1.61242	0.760548	2.16585	0.0603617	1.44603	0.744476	563.952	8.71211	574.326	9.50832	615.593	31.5639	91.6112	563.952	8.71211
U205		52991.3	42.7555	17.9912	1.2326	0.0906312	0.32991	1.62472	5.28063	2.12583	0.116141	1.37092	0.764278	1837.94	26.0005	1865.74	18.1928	1896.84	25.333	96.8951	1896.84	25.333
U206		42116.9	103.488	20.6059	0.837487	b.d.	0.176713	1.59924	1.79049	2.10425	0.0735189	1.36759	0.760003	1048.99	15.4922	1042.01	13.7277	1027.38	28.0995	102.103	1027.38	28.0995
U207		12984.9	72.659	7.17356	0.574746	0.00987982	0.0929012	1.62987	0.759109	2.30625	0.0592894	1.63167	0.706716	572.673	8.93647	573.496	10.1128	576.762	35.759	99.2911	572.673	8.93647
U208		10528.1	38.07	8.12363	2.7563	0.0074528	0.132891	1.6881	1.20143	2.42789	0.0655992	1.74498	0.695296	804.337	12.7723	801.248	13.4651	792.668	36.9125	101.472	804.337	12.7723
U209		29685.3	100.908	15.1847	0.864932	0.143411	0.13085	1.61053	1.25916	2.29875	0.0698232	1.64025	0.700612	792.716	12.0206	827.531	13.0215	922.235	34.0611	85.9559
U210		14591.5	71.5875	7.32483	0.31703	0.0851021	0.102216	1.62475	0.880257	2.38497	0.0624863	1.74593	0.681244	627.382	9.71885	641.122	11.3456	689.835	37.5327	90.9467	627.382	9.71885
U211		41871.5	189.003	19.3457	0.00195432	0.0109833	0.111312	1.5866	0.946561	2.09406	0.0617023	1.36667	0.757667	680.362	10.251	676.31	10.3497	662.843	29.6475	102.643	680.362	10.251
U212		30027.9	76.6234	13.2508	0.321991	0.00637091	0.172053	1.59876	1.71086	2.15287	0.0721516	1.4418	0.742622	1023.41	15.1392	1012.61	13.8132	989.306	29.739	103.448
U213		303986	194.425	90.0164	0.966682	0.000600286	0.385134	1.58103	6.79409	2.00408	0.128001	1.23154	0.788905	2100.22	28.3609	2084.95	17.7949	2069.91	22.5254	101.464	2069.91	22.5254
U214		157544	108.731	49.7111	1.1905	0.00480031	0.364021	1.57713	6.20604	2.01589	0.123704	1.25558	0.782349	2001.2	27.1537	2005.3	17.6811	2009.52	23.0643	99.586	2009.52	23.0643
U215		11611.6	57.2614	5.97602	0.295565	0.0541635	0.105362	1.63195	0.876522	2.43888	0.0603633	1.81242	0.669141	645.756	10.0338	639.103	11.5754	615.65	39.4077	104.89	645.756	10.0338
U216		81806.4	30.3508	24.3074	2.40204	0.00498779	0.520656	1.62313	12.1218	2.08861	0.168932	1.31443	0.777134	2701.96	35.8545	2613.88	19.6716	2546.34	22.9891	106.112	2546.34	22.9891
U217		12766.2	66.5392	8.23282	1.18802	0.00884269	0.102264	1.62866	0.837704	2.41457	0.0594379	1.78259	0.674513	627.661	9.74634	617.878	11.1839	582.198	38.9799	107.809	627.661	9.74634
U218		54156.9	39.6587	19.9498	1.84116	b.d.	0.363378	1.60925	6.03013	2.09584	0.12041	1.3427	0.767833	1998.17	27.67	1980.2	18.3033	1961.5	24.6776	101.869	1961.5	24.6776
U219		54276.7	130.453	24.275	0.515862	0.000817813	0.17628	1.59153	1.79382	2.07856	0.0738361	1.33696	0.765686	1046.62	15.3855	1043.21	13.5696	1036.08	27.4564	101.017	1036.08	27.4564
U220		300054	118.053	64.6762	0.605667	0.00741355	0.476072	1.5861	10.9277	2.00221	0.166551	1.22194	0.792174	2510.13	33.0046	2516.99	18.7041	2522.53	21.546	99.5088	2522.53	21.546
U221		12715.3	53.7191	7.11196	1.35253	0.684112	0.103384	1.65899	0.951288	2.84538	0.0667655	2.3117	0.583045	634.211	10.0262	678.773	14.0927	829.529	48.446	76.4544
U222		164015	282.182	63.5748	0.430346	0.00816322	0.216761	1.63615	2.89864	2.15853	0.0970302	1.40793	0.757994	1264.74	18.8018	1381.56	16.3226	1566.96	26.9493	80.7131
U223		32109	141.175	17.2719	0.528709	0.0151281	0.116268	1.58901	0.992157	2.13969	0.0619177	1.43294	0.742637	709.047	10.6761	699.82	10.8307	670.304	31.0142	105.78	709.047	10.6761
U224		10287.9	64.1988	5.4552	0.324052	0.0364752	0.0851799	1.65092	0.680119	2.57643	0.0579351	1.97799	0.64078	526.967	8.35849	526.846	10.596	526.323	43.5982	100.122	526.967	8.35849
Sample Myr 14 (Myra 1 borehole, Early Miocene)
U225		37463.9	181.373	20.9059	0.83029	0.000291846	0.10176	1.59141	0.857508	2.12925	0.0611444	1.41461	0.747403	624.713	9.48108	628.761	9.9899	643.349	30.7569	97.1032	624.713	9.48108
U226		3946.09	20.4983	2.23995	0.937467	0.0811772	0.093377	1.76694	0.777876	3.23561	0.0604455	2.71056	0.54609	575.479	9.73255	584.271	14.3801	618.591	58.6848	93.0306	575.479	9.73255
U227		16975	59.4921	9.22714	1.02896	b.d.	0.13157	1.61854	1.20226	2.25453	0.0663038	1.56947	0.717905	796.813	12.139	801.63	12.5092	815.041	33.1512	97.7636	796.813	12.139
U228		18873.6	117.617	10.3855	0.527966	0.00505841	0.0841745	1.60802	0.669857	2.28203	0.0577425	1.61924	0.704645	520.992	8.05289	520.626	9.30184	519.019	35.8288	100.38	520.992	8.05289
U229		4605.45	16.51	2.1621	0.436246	0.0527439	0.127143	1.8063	1.15385	3.02319	0.0658491	2.42424	0.597482	771.547	13.1412	779.059	16.4533	800.641	51.0121	96.3662	771.547	13.1412
U230		115181	92.3934	34.2956	0.71043	b.d.	0.327423	1.58193	5.17357	2.02696	0.11465	1.26731	0.780445	1825.88	25.1728	1848.28	17.2933	1873.59	23.5794	97.4536	1873.59	23.5794
U231		159639	301.57	63.0279	0.811986	2.19095	0.179654	1.7464	2.23539	2.73743	0.0902843	2.10799	0.63797	1065.08	17.1547	1192.21	19.2215	1430.69	40.5843	74.4453
U232		19169.6	48.8633	12.1173	2.27779	b.d.	0.167178	1.60166	1.666	2.2403	0.0723088	1.56641	0.714932	996.543	14.7983	995.665	14.2313	993.73	32.2208	100.283	996.543	14.7983
[truncated: 329 more rows]

## Sheet: U-Pb Metadata
	LA-ICP-MS U-Th-Pb data report
	Laboratory & Sample Preparation
	Laboratory name	FIERCE, Frankfurt Isotope & Element Research Center Goethe Univesität, Frankfurt am Main
	Sample type/mineral	Zircon
	Sample preparation	25 mm polished resin mounts
	Imaging	SEM- BSE + CL
	Laser ablation system
	Make, Model & type	RESOlution ArF excimer laser (COMpex Pro 102)
	Ablation cell	Two-volume ablation cell (Laurin Technic S155)
	Laser wavelength	193 nm
	Pulse width	20 ns
	Fluence	6-9 J/cm2
	Repetition rate	6 Hz
	Pre-ablation	4 pulses (same parameters as main ablation)
	Ablation duration	16 s
	Ablation rate	~ 0.6 μm/s
	Spot shape & size	Round, 23-26 mm
	Sampling mode	Static spot ablation
	Gasses	Sample cell: He. Funnel: He + Ar. Tubbing: He + Ar + N
	Gas flows	He (300 ml/min), Ar (1000 ml/min), N (8 ml/min).
	ICP-MS Instrument
	Make, Model & type	ThermoScientific ElementXr sector field ICP-MS
	Sample introduction	Ablation aerosol
	RF power	1300 W
	Detection system	Secondary electron multiplier (with conversion dynode at -8kV). Simultaneous analogue and counting (pulse) modes of detection (conversion factors calculated per mass and applied offline). Magnetic field fixed. Detection by peak jumping with electrostatic analyzer.
	Masses measured	202, 204, 206, 207, 208, 232, 238
	Dwell times	206: 1 ms, 207: 5 ms, 208: 9 ms, 232: 2.1 ms, 238: 1.5 ms
	Samples per peak/integration type	4 for all masses/average
	Total time per run	99 ms
	Number of runs/total time	370 / 36.6 s
	Acquisition mode	Trigger from laser (20 s after pre-ablation), background: 18 s, ablation: 18 s
	Dead time	22 ns
	Data Processing
	Gas blank	20 s on-peak zero subtracted.
	Calibration strategy	- Primary RM: GJ-1 - Validation RM: 91500, BB-16, Monastery, Temora
	Reference Material (RM) information	Soda-lime glass NIST SRM-614, WC-1 (Roberts et al., 2017), ASH15D (Vaks et al., 2003), NAMA (in-house dolomite RM), Calgrun (in-house calcite RM).
	Data processing / LIEF correction	In-house VBA spreadsheet program (Gerdes and Zeh, 2006, 2009). Intercept method for LIEF correction.
	Mass discrimination	²⁰⁷Pb/²⁰⁶Pb (-0.11%) and ²⁰⁶Pb/²³⁸U (-12.72%) normalised to primary RM.
	Common-Pb correction	208 based common lead correction on all refrence materials and unknonws			²⁰⁷	²⁰⁶	²³⁸
	Uncertainty level & propagation	Uncertainties are quoted at 2δ absolute and are propagated by quadratic addition of the within run precision, counting statistics, background, common Pb correction and the excess of scatter (calculated from the primary RM). In addition, an excess of variance of 0.48 % (1δ), calculated from the offset RM, was added quadratically to the ²⁰⁶Pb/²³⁸U ratios. Systematic uncertainties are reported as an…
	Other information

## Sheet: Lu-Hf LA-MC-ICP-MS data
Sample / U-Pb analysis	176Yb/177Hf a	±2s	176Lu/177Hf a	±2s	178Hf/177Hf	SigHf b	176Hf/177Hf	±2s c	176Hf/177Hf(t)d	eHf(t) d	±2s c	TNC e	age f	±2s
						(V)						(Ga)	(Ma)
Sample Kar 17 (Karish North 1 borehole, Early Miocene)
Kar 17 - Seq 3b U006	0.0497003	40.4257	0.00135637	8.2124	1.4672	18.1114	0.280796	16.0104	0.280714	-1.76711	0.570245	3.55372	3128.74	12.7514
U036	0.0279149	24.3982	0.000793945	5.09864	1.46724	14.7181	0.282647	16.9314	0.282638	8.59398	0.599565	0.926209	617.483	8.08318
U045	0.00381777	6.61055	0.000109983	1.48934	1.46722	16.5756	0.281827	17.6193	0.281825	-11.8683	0.624442	2.35399	986.844	12.379
U050	0.0255397	22.5224	0.000676193	4.47305	1.46723	15.936	0.282091	16.2053	0.282082	-10.1829	0.573905	1.99151	657.925	8.22679
U056	0.0116313	10.5509	0.000392407	2.65922	1.46723	14.6232	0.281522	21.6919	0.281516	-28.4396	0.768346	3.04174	737.344	9.28455
U062	0.0245032	19.9505	0.000747384	4.73967	1.46722	16.1941	0.281696	15.4165	0.28167	2.91884	0.547486	2.27307	1875.84	16.434
U087	0.0288107	25.0078	0.000925443	6.09342	1.4672	12.2762	0.282596	20.2446	0.282584	8.58677	0.717024	0.996512	702.443	9.15692
U088	0.0284325	25.8559	0.000797981	5.61582	1.4672	13.7747	0.282618	17.2412	0.282606	11.4431	0.610777	0.913256	794.262	10.1117
U089	0.0326749	27.6271	0.000885418	5.76875	1.46724	11.2028	0.282395	22.1533	0.282384	1.77197	0.784651	1.38367	714.936	9.57114
U090	0.020091	16.692	0.000555087	3.63556	1.46727	14.7365	0.281727	15.7983	0.281704	10.8362	0.561418	2.06994	2164.68	16.1632
U091	0.0408795	63.8511	0.00115625	16.8624	1.46725	16.2598	0.281462	19.3948	0.281449	-34.0361	0.686759	3.22138	593.534	7.87411
U094	0.00331263	3.94041	8.79488e-05	0.979345	1.46727	13.894	0.282444	16.8324	0.282443	1.33886	0.596039	1.31495	602.465	7.74862
U098	0.0403798	37.7727	0.00112121	8.93176	1.46726	11.6124	0.282629	17.981	0.282612	12.632	0.637046	0.883131	838.188	10.9652
U099	0.0235877	21.1855	0.000703335	5.30182	1.46721	13.2805	0.282484	15.2425	0.282474	4.8571	0.539868	1.20871	709.256	9.03048
U101	0.0367736	30.4262	0.000979493	6.23638	1.46717	14.5159	0.281191	15.9473	0.281176	-38.8865	0.56496	3.65625	808.886	10.4735
U102	0.0197413	16.2106	0.000654894	4.20708	1.4672	14.2383	0.282494	18.5807	0.282481	12.4518	0.658586	1.05475	1034.89	19.5642
U103	0.0205962	16.7448	0.000579115	3.61789	1.46723	12.6673	0.282148	16.8576	0.282139	-5.01242	0.597194	1.8244	797.721	10.1051
U106	0.0245252	20.9982	0.000709939	4.80892	1.46723	9.59195	0.282612	18.9593	0.282598	16.3084	0.671987	0.828755	1021.98	29.1631
U108	0.0486897	46.0272	0.0014735	11.8733	1.46723	14.0521	0.281394	19.1413	0.281377	-35.7259	0.677842	3.34359	632.885	8.33386
U109	0.00404577	3.6003	0.000113597	0.824829	1.46725	13.1801	0.282083	18.3205	0.282082	-12.6387	0.648652	2.0347	548.326	7.085
U111	0.0160899	12.9456	0.000465597	2.89926	1.46723	12.2177	0.281167	19.3762	0.281143	2.73276	0.689381	2.93382	2672.31	13.2998
U112	0.0299092	25.613	0.000972289	6.12095	1.46719	12.3826	0.281182	17.9104	0.281168	-41.0733	0.634382	3.70158	723.772	9.45232
U113	0.0199764	16.6302	0.000581063	3.72782	1.46726	11.8584	0.282617	19.3414	0.282611	6.94822	0.684857	0.992699	587.399	7.47938
U114	0.0210869	17.8507	0.000611954	4.09445	1.46724	11.6349	0.28204	19.2307	0.282033	-13.6845	0.680926	2.11668	578.926	7.67142
U115	0.0189886	15.7311	0.000520912	3.47269	1.46719	14.0837	0.281909	23.8961	0.281902	-15.3034	0.84638	2.31632	714.701	9.70329
U116	0.0174181	15.6944	0.000598344	4.20503	1.46723	14.4586	0.282635	17.2719	0.282628	8.41255	0.611631	0.942408	624.934	8.15889
U117	0.0290511	23.4941	0.000888444	5.45722	1.46721	11.7499	0.282641	16.8759	0.282627	13.0959	0.597892	0.854791	835.17	10.6888
U118	0.0253987	21.2113	0.000695836	4.54876	1.46726	13.0948	0.282103	15.7851	0.282095	-10.423	0.558983	1.97967	627.679	7.97144
U121	0.0202398	23.7189	0.000562421	6.39286	1.46721	10.8711	0.282103	16.4561	0.282092	-1.52774	0.583269	1.82147	1026.49	18.6636
U122	0.017022	15.7219	0.000565734	3.74897	1.46724	11.7109	0.281807	20.8668	0.281798	-15.7219	0.739323	2.45831	859.573	10.8806
U123	0.066021	69.5243	0.00163693	14.1794	1.46721	12.1212	0.282412	20.6049	0.282391	1.4261	0.729763	1.38085	688.358	8.68781
U125	0.0247828	22.061	0.000725468	5.06585	1.46726	14.0595	0.282498	16.853	0.282485	10.1103	0.597201	1.09442	924.47	11.7778
U126	0.0365192	29.7057	0.00113255	6.88006	1.46723	9.65839	0.281937	24.3585	0.281923	-16.0419	0.862624	2.30084	647.398	8.69769
U127	0.0424782	35.1124	0.00116799	7.57978	1.46719	11.9044	0.282569	19.8591	0.282557	4.41906	0.703144	1.10935	559.13	7.25083
U128	0.0296542	34.8836	0.000841623	9.07599	1.46712	11.0936	0.282324	19.8593	0.282311	1.5827	0.703565	1.48105	820.618	10.7858
U129	0.0217484	22.1646	0.000675881	5.96565	1.46721	13.9597	0.282536	16.9167	0.282528	5.61197	0.599099	1.12491	658.151	8.44519
U136	0.0335232	29.5247	0.000931384	6.1819	1.46721	13.551	0.282585	18.07	0.282575	5.55627	0.639831	1.06481	581.396	7.44666
U138	0.0301852	24.8095	0.000871206	5.54637	1.46719	11.5807	0.281496	17.4021	0.281483	-28.0362	0.616496	3.07846	808.048	10.3218
U140	0.00108418	1.32837	2.06161e-05	0.200084	1.46719	15.5278	0.281655	14.9041	0.281655	-26.5825	0.527755	2.83073	601.953	8.19901
Sample Kar 15 (Karish North 1 borehole, Early Miocene)
Kar 15 - Seq 3 U327	0.0204876	16.5573	0.000627415	3.90061	1.46722	17.83	0.282271	17.0005	0.282259	3.70431	0.602527	1.50819	995.995	12.6972
U328	0.0217013	20.8631	0.000601736	4.60448	1.46721	13.8519	0.282229	18.4125	0.282221	-4.60528	0.652115	1.71153	687.686	10.1147
U329	0.0178051	17.3349	0.000536833	4.34079	1.46719	13.3795	0.28118	21.7397	0.281153	2.00882	0.773388	2.93571	2625.56	23.165
U331	0.00375197	3.48634	9.37695e-05	0.682953	1.46717	14.5915	0.281312	15.4771	0.281309	-7.44326	0.549773	2.92958	1982.25	25.2839
U332	0.0165517	14.3761	0.000478706	3.12115	1.46719	9.21231	0.282594	22.7031	0.282589	7.19846	0.803977	1.01663	633.316	9.21811
U333	0.0587725	54.0321	0.00153649	11.2011	1.46715	15.8411	0.2818	16.4252	0.281774	-15.6504	0.582011	2.48818	900.559	15.0988
U336	0.047849	40.8298	0.00136419	9.21073	1.4672	11.7526	0.282641	15.0801	0.282622	10.5848	0.534142	0.908988	730.99	10.9667
U337	0.0276026	53.5768	0.000651695	10.9536	1.46721	15.9813	0.281822	17.7992	0.281816	-22.7485	0.630154	2.55614	518.408	7.54161
U338	0.0206486	18.6589	0.000686275	5.32553	1.4672	13.4884	0.281273	16.7898	0.28124	1.98099	0.597111	2.82881	2492.6	23.6313
U340	0.0139104	11.6613	0.000361092	2.26636	1.46719	15.4242	0.282539	16.325	0.282535	2.41985	0.577944	1.17503	504.898	6.74743
U341	0.00899724	7.79068	0.000251754	1.77311	1.46724	14.4141	0.282488	16.4136	0.282485	3.10442	0.581224	1.22796	615.026	8.73285
U342	0.069732	102.911	0.00195249	21.9463	1.46723	8.0936	0.281789	24.1095	0.281759	-18.5118	0.854093	2.5568	796.012	11.9659
U343	0.0487384	39.6478	0.00140038	8.8371	1.46718	12.9067	0.282481	19.2591	0.282455	9.84701	0.682518	1.13793	959.627	14.0421
U344	0.015502	12.7709	0.000426896	2.6569	1.46724	11.9504	0.282416	18.5503	0.282411	0.468087	0.656886	1.37179	613.274	8.95687
U345	0.026153	43.8028	0.00072397	11.7335	1.46723	10.0713	0.281054	25.8201	0.281019	-5.54732	0.918291	3.2546	2506.85	22.0517
U346	0.0172475	15.0581	0.000465386	3.28121	1.46725	13.9149	0.282075	23.2781	0.282065	-1.81647	0.825123	1.8609	1055.17	42.8919
U349	0.0493597	56.0654	0.00142159	13.2572	1.46716	9.72463	0.282505	17.5388	0.282484	7.59074	0.62135	1.14493	815.732	11.7201
U350	0.0172616	14.3275	0.000497241	3.13842	1.46721	10.0653	0.282551	23.9029	0.282545	7.15919	0.846592	1.07437	700.855	11.3885
U351	0.100805	81.9057	0.0028468	17.6039	1.46717	6.46549	0.282593	28.4907	0.282554	8.03467	1.00914	1.04583	725.155	9.87343
U353	0.0159868	13.9591	0.000466661	3.10833	1.46721	14.5322	0.281482	15.3405	0.281473	-24.3495	0.543681	3.02787	986.411	15.1246
U354	0.0167196	13.7421	0.000453512	2.82557	1.4672	10.8124	0.282241	16.3351	0.282235	-4.66575	0.578506	1.69376	662.078	9.92418
U355	0.0194885	15.8283	0.000533	3.33254	1.46717	12.7722	0.281206	18.4698	0.281185	-9.08277	0.656259	3.11692	2101.75	23.3718
U356	0.0440951	35.6939	0.00129582	7.98755	1.46719	12.6414	0.281636	18.0678	0.281591	-1.66296	0.641524	2.46157	1797.66	26.8405
U357	0.0183102	15.3773	0.000549629	3.80471	1.4672	10.4705	0.28203	19.589	0.282019	-3.37018	0.694367	1.94977	1059.54	38.5531
U358	0.0737355	115.901	0.00203209	29.4551	1.46715	11.7024	0.282462	20.4092	0.282428	7.41902	0.723171	1.21981	895.237	13.1621
U359	0.0037261	3.35106	8.34355e-05	0.60771	1.46719	13.6289	0.281221	18.3434	0.281218	-7.95837	0.651766	3.05374	2099.58	32.3426
Sample Kar 13 (Karish Main 2 borehole, Early Miocene)
Kar 13 - U196	0.0223662	19.6315	0.000727687	5.24888	1.46722	13.5196	0.282265	18.3371	0.282251	3.71521	0.649915	1.51758	1008.17	31.8991
U197	0.00987574	13.1131	0.000314167	4.08823	1.46717	12.7078	0.28251	21.0047	0.282506	3.53613	0.743773	1.19161	599.813	8.95026
U199	0.0139228	11.9085	0.000452633	2.91935	1.46721	8.25141	0.282002	23.893	0.281997	-15.6242	0.845955	2.19777	549.792	7.39254
U202	0.0412119	35.2072	0.00111541	7.15274	1.46721	16.2878	0.282341	17.6734	0.282323	2.94118	0.626186	1.44045	862.334	14.3655
U203	0.0152516	14.2855	0.000421291	3.14671	1.46722	11.2287	0.281998	22.1796	0.281992	-10.6521	0.785696	2.11662	778.813	9.91375
U204	0.000980016	1.25723	2.45964e-05	0.222413	1.46722	10.5488	0.281611	21.3575	0.28161	-21.6099	0.756766	2.80373	893.048	11.9818
U205	0.0237774	20.398	0.000690331	4.92682	1.46723	10.9271	0.282406	24.7693	0.282397	1.59483	0.877247	1.36941	685.744	8.93103
U207	0.0248582	21.1489	0.000743076	4.7483	1.46718	14.5664	0.281041	18.0581	0.281006	-6.19334	0.642226	3.28371	2499.15	22.7055
U211	0.0294286	25.1328	0.000937641	6.0708	1.46723	12.7655	0.28097	16.8848	0.280917	0.544447	0.601091	3.25677	2920.4	21.017
U212	0.0225746	18.1772	0.000649852	3.95359	1.46721	15.5488	0.281688	16.4237	0.281676	-16.8743	0.582089	2.63599	999.668	32.4437
U213	0.0212143	28.1387	0.000618763	6.8019	1.46722	16.9628	0.28237	15.9591	0.28236	3.45459	0.565399	1.38272	826.605	13.2198
U214	0.0267554	24.651	0.000786875	5.60111	1.46719	12.1478	0.282555	18.4272	0.282543	9.00495	0.652778	1.04133	785.163	10.4961
U215	0.0140214	11.4386	0.000393778	2.40803	1.46718	14.3166	0.282076	18.021	0.282069	-3.02147	0.638692	1.87853	996.145	13.0789
U217	0.0276757	30.3923	0.000812136	7.33815	1.46722	16.8213	0.281461	18.2056	0.281431	-3.29383	0.646679	2.69537	1973.82	23.6878
U218	0.0128351	10.4374	0.000377879	2.30016	1.46723	14.3476	0.281231	16.7718	0.281213	0.291879	0.596426	2.8966	2461.47	21.3673
U219	0.021859	18.1346	0.000601119	3.84413	1.46719	13.4416	0.280962	17.8355	0.280934	-9.21516	0.634279	3.43278	2479.36	26.4134
U220	0.0650058	54.3023	0.0020239	13.0547	1.46725	10.4045	0.282207	23.4776	0.282169	0.593078	0.832089	1.68284	999.739	12.9641
U221	0.0146764	23.2537	0.000472036	6.08969	1.46721	14.1015	0.282524	15.4957	0.282518	7.37148	0.54889	1.10518	752.613	10.5791
U222	0.00859644	11.1356	0.000260986	2.61028	1.46726	12.4178	0.280945	22.0027	0.280932	-6.45397	0.7827	3.38124	2601.17	22.6155
U224	0.0370786	30.8385	0.00112791	7.83473	1.46713	9.47926	0.281254	21.4971	0.2812	1.11977	0.764564	2.89658	2517.4	23.5678
U225	0.0195201	21.8124	0.000532489	5.31142	1.46717	12.6281	0.281029	17.3749	0.281004	-7.2341	0.61787	3.30734	2458.32	26.3861
U227	0.0156383	12.9478	0.000469319	2.90594	1.46717	13.2242	0.281248	17.4364	0.281225	1.15595	0.620087	2.86388	2479.77	22.196
U228	0.0243591	27.2736	0.000578706	6.03934	1.46722	16.3205	0.282214	18.1586	0.282208	-7.16884	0.642985	1.77445	593.907	7.74709
U229	0.0263479	21.3152	0.000837194	5.22642	1.46722	12.3909	0.281295	24.0251	0.281253	6.33881	0.85476	2.7235	2659.31	26.0874
U230	0.0807927	126.1	0.0018038	25.4065	1.46723	10.7133	0.282036	32.5379	0.282016	-13.9646	1.15215	2.14441	594.134	8.06351
U231	0.0779151	64.8004	0.00221106	14.1924	1.46724	12.153	0.28265	19.7307	0.282619	11.1746	0.698918	0.902239	762.687	10.9993
U233	0.048159	92.3667	0.00142341	25.1713	1.46725	15.7029	0.28281	17.9849	0.282793	14.7542	0.636911	0.608129	647.718	9.20405
U234	0.055995	46.7688	0.00157747	10.5402	1.4672	10.5757	0.282277	20.1469	0.28225	1.34401	0.713892	1.56438	905.95	13.0918
U236	0.091136	106.753	0.00244655	24.2807	1.46723	18.1429	0.282083	26.0384	0.282038	-4.69899	0.92279	1.94975	970.939	13.409
U237	0.0139599	12.413	0.000388166	2.92515	1.46718	12.921	0.282456	18.5097	0.282451	2.85256	0.655511	1.27634	656.917	8.6699
U239	0.0488794	57.8271	0.00132689	14.1354	1.4672	11.7594	0.28232	17.3307	0.282303	-1.39574	0.613818	1.547	701.629	10.5076
U240	0.0171493	14.8171	0.000508881	3.31659	1.46722	11.5787	0.281993	18.4953	0.281984	-6.74475	0.655456	2.05629	964.414	13.2624
U241	0.0549509	56.5118	0.0015201	13.5903	1.46721	14.3152	0.282312	17.5701	0.282295	-4.62038	0.622115	1.61483	569.277	7.84462
U242	0.0333891	26.8966	0.000917406	5.55907	1.4672	11.8848	0.281872	21.4124	0.281857	-13.7764	0.758642	2.34685	852.27	12.3773
U243	0.0169541	16.0592	0.000449679	3.2569	1.46719	12.0715	0.281972	20.1743	0.281968	-17.1479	0.714257	2.2622	527.986	8.01862
U244	0.0268393	21.8421	0.000765168	4.76226	1.46721	10.9727	0.28243	21.1794	0.282416	8.18467	0.75055	1.22035	947.57	14.0018
U246	0.0192733	62.7471	0.000454119	14.9413	1.46719	17.8712	0.282315	44.4907	0.28231	-3.69219	1.57537	1.57949	588.087	7.99543
U247	0.0238893	43.0668	0.000705845	12.6219	1.46717	16.6793	0.281473	25.7614	0.281466	-34.318	0.912117	3.20436	554.78	8.07265
U249	0.0535861	50.438	0.00146614	10.2594	1.46719	9.45992	0.28206	18.5255	0.28204	-10.1098	0.656177	2.0456	728.412	10.5443
U255	0.0141617	15.2915	0.000388354	3.57808	1.46719	10.6821	0.281134	22.0891	0.281116	-2.59645	0.785563	3.0759	2486.34	22.6968
U256	0.0392021	38.8329	0.00112533	8.61833	1.46722	15.2031	0.282589	18.6424	0.282573	10.0106	0.6604	0.983802	783.145	11.2611
U257	0.019474	19.6475	0.00068579	6.38452	1.46721	11.4615	0.282491	20.0058	0.282481	7.95035	0.708782	1.14196	836.372	12.4127
U258	0.0264354	25.7005	0.000853103	6.99986	1.4672	10.5245	0.28107	21.37	0.281027	-2.53221	0.760233	3.18431	2623.54	21.1328
U260	0.0212382	17.9919	0.000568273	3.64128	1.46721	17.3	0.282246	16.961	0.282238	-2.63599	0.600788	1.6527	747.327	10.4929
U261	0.0299074	26.1478	0.000801286	5.6467	1.46721	14.2615	0.281326	17.9176	0.281298	-11.1207	0.636254	3.01321	1839.37	22.5501
U262	0.0229945	20.0889	0.000616434	4.3617	1.46716	12.9414	0.281998	20.2369	0.281992	-16.8071	0.716436	2.22509	505.33	7.85723
U263	0.0441451	89.8453	0.00109631	21.8742	1.46719	13.8478	0.282271	21.0101	0.282258	-4.21047	0.744046	1.6567	647.351	8.72312
U264	0.0206165	18.2571	0.000612757	4.02761	1.46722	17.1002	0.282377	15.3766	0.282365	8.71812	0.54504	1.27628	1051.71	28.9342
U266	0.00957708	7.9491	0.000271527	1.68118	1.46718	15.3983	0.280674	15.5446	0.280663	-27.3291	0.552338	4.11374	2114.03	30.018
U268	0.0294689	23.6933	0.000830111	5.01976	1.46721	11.893	0.28212	20.4948	0.282105	-1.74363	0.726369	1.80883	996.682	15.1869
U269	0.032844	31.4551	0.000909655	6.9949	1.46722	13.2679	0.281203	19.2565	0.281171	-15.5698	0.683802	3.25679	1841.63	24.0661
U273	0.0318303	28.7609	0.000986362	6.9003	1.46719	14.7418	0.282302	14.7124	0.282285	3.61014	0.521378	1.4767	951.355	94.4919
U274	0.0185203	15.0722	0.000555011	3.51513	1.4672	10.2971	0.281847	21.8392	0.281837	-11.7305	0.77398	2.33623	974.363	16.1353
U275	0.0976455	82.7088	0.00241737	15.6448	1.46718	11.6018	0.282598	21.7759	0.282561	10.044	0.771436	0.997674	802.28	11.1645
U276	0.0239728	19.5026	0.000655922	4.05005	1.46716	12.6449	0.281904	16.8871	0.281891	-8.28016	0.598568	2.20463	1042.85	33.7975
U277	0.0456388	41.2322	0.00122017	8.54954	1.46719	13.2055	0.282156	19.115	0.282134	-1.18702	0.677434	1.76121	975.957	31.0482
U279	0.0363438	29.1647	0.00104722	6.35992	1.46722	13.7566	0.282281	12.8315	0.282261	3.48175	0.454756	1.50932	982.424	13.0863
U280	0.0257343	23.9747	0.000794685	6.86618	1.46724	16.5787	0.281729	13.3258	0.281715	-16.5392	0.472242	2.58002	953.69	12.3413
U282	0.0510706	46.1416	0.00140337	9.50318	1.46719	15.3694	0.282164	17.9617	0.282136	0.872325	0.636689	1.71963	1063.22	28.3055
U283	0.0203512	44.0173	0.000483761	8.96789	1.46718	13.4156	0.282263	17.5333	0.282258	-5.63128	0.620831	1.68156	583.141	8.21944
U284	0.0257607	24.0139	0.000688423	5.08491	1.46722	14.235	0.280985	15.9577	0.280951	-6.71291	0.567607	3.36205	2560.29	20.8029
U285	0.026466	22.2537	0.000752571	4.99823	1.46718	11.1838	0.282321	22.1481	0.28231	0.766215	0.784592	1.49719	785.565	12.3093
U286	0.0257415	22.4158	0.000763204	5.23411	1.46715	14.111	0.281917	17.9973	0.281903	-9.53096	0.637811	2.21103	967.702	12.6931
U287	0.0123295	12.7118	0.000343298	2.8285	1.4672	14.2564	0.282093	18.4967	0.282089	-10.2524	0.655032	1.98393	644.127	8.31906
U288	0.00939305	20.6173	0.000250937	5.36283	1.46722	13.0407	0.282465	22.2133	0.282462	2.54448	0.786615	1.26739	625.4	8.83907
U289	0.05644	47.553	0.00163815	10.8022	1.46719	13.0405	0.282345	15.5561	0.282314	5.43195	0.55132	1.40393	985.351	41.3534
U290	0.0290525	24.4478	0.00078167	4.9221	1.46718	17.4384	0.281952	16.6788	0.28194	-11.999	0.590863	2.20846	801.396	11.1193
U291	0.0340878	51.5943	0.0010016	14.2841	1.46718	12.2391	0.282573	17.5112	0.28256	7.46229	0.620197	1.04918	690.649	10.7234
U292	0.0189467	16.5621	0.000543292	3.6894	1.4672	12.9271	0.282321	22.5534	0.282311	4.55914	0.799248	1.425	952.25	13.5396
U294	0.0714777	58.2951	0.00188758	11.5458	1.46722	11.4938	0.282016	21.394	0.281988	-10.2789	0.757907	2.1157	802.363	10.7746
U295	0.0378891	40.3262	0.00111456	10.4428	1.46714	11.6492	0.281993	18.8919	0.28198	-14.4516	0.669003	2.19922	628.607	9.85189
U297	0.0284081	26.3566	0.000818767	6.23345	1.46724	11.814	0.282345	22.9982	0.28233	5.26653	0.815014	1.38662	953.148	13.9792
U298	0.0258513	21.5672	0.000858103	5.69543	1.46719	11.8092	0.281087	18.9623	0.281041	1.64118	0.674827	3.08184	2779.95	22.0134
U299	0.0077137	7.30861	0.000206591	1.55315	1.46718	14.1019	0.281928	19.365	0.281926	-18.0716	0.685639	2.3324	552.601	8.46154
U305	0.00915194	7.62502	0.000280086	1.75933	1.4672	12.0769	0.281149	18.3743	0.281135	-2.02137	0.653444	3.03983	2480.88	29.1602
U307	0.0187518	35.025	0.00060825	10.9632	1.46713	13.7164	0.281364	32.4927	0.281354	-31.7235	1.15121	3.30729	846.881	15.2043
U308	0.00681243	6.48933	0.000208809	1.36744	1.46721	15.6809	0.281619	14.0125	0.281616	-27.7231	0.496196	2.8996	611.453	8.03095
U309	0.0237374	21.169	0.000627439	4.62948	1.46719	11.4455	0.282408	21.1122	0.282402	-1.22219	0.747501	1.41492	552.801	9.94094
U311	0.0186992	33.4626	0.000481497	6.78253	1.4672	13.7141	0.281247	16.4481	0.281224	1.16084	0.584941	2.8651	2481.59	28.1358
U312	0.00976503	7.8921	0.000255954	1.5468	1.46715	12.4543	0.282241	20.5939	0.282238	-6.0878	0.729219	1.71583	594.44	8.80112
U313	0.0406513	32.9987	0.00108871	6.6129	1.4672	13.1332	0.280985	18.504	0.280935	-10.1632	0.657989	3.45049	2437.7	24.8143
U314	0.0186512	22.2459	0.000511154	5.08677	1.46714	10.0768	0.281116	18.2697	0.281095	-12.5132	0.649133	3.29491	2090.85	24.5917
U315	0.00900655	7.2316	0.000273382	1.64286	1.46721	14.8843	0.282506	16.9955	0.282503	4.10838	0.601851	1.18514	630.343	9.77966
U316	0.0246846	21.8277	0.00066416	4.75184	1.46713	14.3527	0.282294	17.6394	0.28228	6.68412	0.625308	1.42372	1093.85	42.3542
U317	0.0132759	13.1968	0.000426896	3.33199	1.46722	15.9435	0.282577	14.7305	0.282572	5.8147	0.521604	1.06376	597.49	8.09231
U319	0.0194899	16.2672	0.000547947	3.62536	1.46718	12.4184	0.281953	16.9085	0.281944	-11.2347	0.599036	2.18897	828.185	11.291
U320	0.0162356	13.1625	0.000504588	3.14077	1.46719	14.731	0.280967	17.7931	0.280943	-8.6791	0.632786	3.41135	2488.96	23.7316
U321	0.0505235	136.024	0.00132886	32.818	1.4672	12.5435	0.282545	18.7105	0.282524	9.5196	0.662895	1.05662	838.531	11.8617
U322	0.0207367	17.8749	0.000561242	3.67435	1.46716	15.8005	0.282276	15.6206	0.282267	-0.241013	0.553386	1.57121	808.168	11.3749
U323	0.0350254	60.5364	0.000875929	12.3769	1.46723	17.365	0.281096	16.9193	0.28105	-0.0400168	0.601999	3.10492	2694.44	20.0493
U325	0.0339073	28.046	0.000953442	5.90709	1.46725	12.157	0.282472	20.8921	0.282461	2.84709	0.739855	1.26347	640.915	9.57702
Sample Kar 7 (Karish North 1 borehole, Middle-Late Miocene)
Kar 7 - Seq 3 U115	0.0447315	39.1681	0.001244	8.10691	1.46719	14.0132	0.281945	17.4995	0.281921	-8.48497	0.620195	2.16894	985.859	31.8824
U117	0.0310024	34.6762	0.000855303	8.55003	1.46715	9.3715	0.282517	22.9602	0.282507	4.24518	0.813076	1.17826	631.167	12.7499
U118	0.0211957	17.1026	0.000600161	3.64537	1.46719	13.7852	0.281977	19.2337	0.281967	-7.88926	0.681588	2.09975	941.271	12.0128
U119	0.0223489	19.9583	0.000677287	4.87167	1.46722	10.5923	0.282349	19.6603	0.282337	5.04025	0.696692	1.38218	932.518	13.4497
U121	0.049665	48.6067	0.00156449	12.8515	1.46717	12.4749	0.282525	19.2792	0.2825	9.04813	0.683067	1.0964	855.065	12.9115
U122	0.025585	22.5091	0.000748724	5.18016	1.46718	12.1295	0.281204	19.8217	0.281176	-11.8959	0.704119	3.18201	1993.95	32.7728
U123	0.0614653	56.7623	0.00182322	13.056	1.46722	9.83462	0.282604	23.1059	0.28258	8.7741	0.818395	0.998384	717.36	9.8015
U125	0.0151861	23.8774	0.000398839	5.72397	1.46723	14.3739	0.282628	18.6428	0.282623	8.76362	0.660212	0.942028	648.149	9.83145
U126	0.0113299	10.1394	0.000336297	2.50832	1.4672	13.8113	0.281385	19.2972	0.281372	-4.01086	0.685551	2.78325	2033.13	21.9602
U127	0.0352207	28.5544	0.00100359	6.20129	1.46713	11.0864	0.281692	19.2795	0.281657	1.81479	0.684627	2.31077	1847.43	28.7782
U128	0.100442	122.72	0.00210528	22.2186	1.46716	17.5638	0.281197	16.049	0.281098	-3.64086	0.570733	3.1185	2468.24	20.7489
U129	0.028495	28.9742	0.000701987	5.89111	1.46718	13.5076	0.282261	16.944	0.282253	-5.30391	0.599992	1.68186	605.239	8.31716
U135	0.0236896	41.3858	0.000572228	8.4971	1.4672	12.5595	0.282602	19.9955	0.282596	6.65842	0.708035	1.01759	598.139	8.29085
U136	0.00852342	6.87388	0.000260499	1.56563	1.46723	13.4214	0.281162	17.4674	0.281149	-1.93229	0.621165	3.02054	2463.25	28.9627
U137	0.00986358	15.8346	0.000304522	4.43235	1.46719	13.3767	0.281632	17.999	0.281629	-28.4273	0.637285	2.89487	560.098	7.15414
U138	0.0215226	19.319	0.000632382	4.49244	1.46722	14.6372	0.282431	16.4154	0.282421	6.01496	0.58159	1.25623	844.917	11.1835
U139	0.00842264	6.94143	0.000235499	1.45606	1.46716	13.4439	0.281411	18.9535	0.281402	-2.33739	0.673382	2.71288	2059.44	22.7212
U140	0.0202706	25.6668	0.000597749	6.4224	1.4672	17.0237	0.281516	15.4317	0.281505	-22.8698	0.546931	2.96154	1002.4	35.4314
U142	0.028454	24.7388	0.000770974	5.26073	1.46718	12.1323	0.282253	21.9187	0.282244	-5.16751	0.776185	1.69209	626.708	8.85872
U144	0.0321855	35.5657	0.00103706	9.46597	1.46723	11.2238	0.282521	20.5658	0.282503	10.128	0.728722	1.07128	897.507	13.8014
U145	0.0119751	10.2132	0.000334833	2.20387	1.46719	14.542	0.281859	19.0685	0.281854	-14.9889	0.675522	2.37208	803.077	10.3223
U146	0.0338058	31.2913	0.000922668	6.90689	1.46715	9.39885	0.282115	22.653	0.282104	-9.86421	0.80221	1.95789	638.164	9.68771
U147	0.0133983	10.7851	0.000396951	2.44459	1.4672	14.9443	0.282528	19.02	0.282521	9.95822	0.673893	1.05117	861.56	12.5469
U149	0.0228783	18.3232	0.00064388	3.86635	1.46723	11.9825	0.282267	20.1952	0.282258	-1.73837	0.715364	1.61075	756.212	10.0232
U150	0.0214695	20.5359	0.000594144	5.18947	1.46727	10.7547	0.281989	25.2025	0.28198	-9.47356	0.892921	2.1114	850.426	12.5905
U151	0.0278896	23.0805	0.000820685	5.14362	1.46726	10.8786	0.281864	21.1585	0.281849	-11.4987	0.749841	2.31639	965.568	13.2639
U152	0.147385	119.38	0.00427164	26.7824	1.46722	8.24595	0.282163	24.1831	0.282107	-8.54741	0.856499	1.92964	690.981	9.71136
U156	0.0792923	99.4912	0.00210297	23.8524	1.46717	14.3446	0.282493	15.0223	0.28246	7.47901	0.532237	1.17803	848.454	13.3318
U157	0.0368536	31.9073	0.00105496	7.24868	1.46719	13.1314	0.28254	19.5802	0.282524	8.79189	0.693655	1.06947	805.003	11.3508
U158	0.0203641	18.3067	0.000537453	3.74217	1.46723	16.5341	0.281127	18.2637	0.281101	-2.13878	0.649583	3.08514	2528.5	22.5834
U159	0.0295823	38.7528	0.000805956	9.03423	1.46715	16.0605	0.281063	13.9806	0.281023	-3.11604	0.497335	3.20094	2604.58	21.4732
U160	0.0214521	17.3798	0.000671848	4.18712	1.46719	13.0265	0.281422	17.7043	0.28141	-27.3494	0.627409	3.1616	953.538	13.4254
U161	0.04239	49.8968	0.00122248	13.0872	1.46715	9.09198	0.28263	22.9551	0.282616	7.44139	0.81284	0.97643	600.834	9.77094
U162	0.0611093	55.0597	0.001703	12.154	1.46721	11.5173	0.282658	19.2917	0.282637	8.99662	0.683176	0.919583	636.59	9.33773
U163	0.0800973	111.432	0.00199681	23.2453	1.46721	13.424	0.282258	20.7975	0.282225	-0.357801	0.736885	1.6283	869.768	12.7832
U164	0.0478537	38.8606	0.00126037	7.82604	1.46716	12.5015	0.282581	16.0356	0.282566	6.38782	0.56786	1.06141	633.176	8.38224
U165	0.0140598	12.7564	0.000413113	3.08164	1.46724	11.8019	0.282432	19.4863	0.282425	6.37588	0.690403	1.24342	853.635	12.4644
U166	0.0211494	16.9657	0.000606346	3.66589	1.46716	12.4427	0.281391	17.284	0.281368	-5.2728	0.613962	2.81277	1984.66	24.4155
U167	0.0513832	54.6806	0.00154487	14.5311	1.46725	7.78064	0.281653	35.4694	0.281593	4.47811	1.26016	2.33857	2061.35	23.9056
U168	0.00878321	18.2	0.000208796	4.11725	1.46716	11.7186	0.282162	18.1299	0.282159	-8.2749	0.64201	1.85718	621.06	8.80065
U169	0.0270948	21.8497	0.000763864	4.60685	1.46724	11.5415	0.281814	17.3167	0.281803	-17.5228	0.613419	2.48273	770.944	12.252
U170	0.0953567	90.3721	0.00249247	18.7714	1.46723	11.3889	0.281693	17.017	0.281606	-0.0737894	0.604279	2.41207	1844	31.4168
U171	0.0358444	29.8534	0.00111607	6.97754	1.46719	15.0724	0.282409	13.1772	0.282389	7.32401	0.466973	1.27189	952.192	13.3891
U172	0.026507	21.6701	0.000784992	4.92133	1.4672	16.0145	0.281736	20.5185	0.281721	-15.3388	0.72721	2.54996	996.136	13.6221
U173	0.0291161	32.5381	0.000985773	10.0896	1.46721	14.639	0.282613	16.6179	0.282599	10.0181	0.588626	0.94937	741.78	9.95845
U174	0.015114	12.4916	0.000470673	2.86769	1.4672	13.6298	0.28241	18.441	0.282403	4.73053	0.653311	1.30295	815.314	12.3748
U176	0.0307664	26.8478	0.00085124	5.99178	1.46722	14.4496	0.282602	19.1802	0.282592	7.05889	0.679201	1.01443	621.25	8.53636
U177	0.113918	117.353	0.00307883	28.9294	1.46723	10.3987	0.282536	22.9207	0.282488	7.99178	0.812035	1.13117	826.043	11.1392
U178	0.0351663	29.5019	0.000922264	5.93824	1.46723	7.97684	0.28232	28.35	0.282309	-2.5082	1.00397	1.55867	641.62	9.76304
U179	0.0201374	18.4468	0.000539791	3.7051	1.46724	12.1717	0.282568	20.9371	0.282562	5.74905	0.741402	1.07871	611.242	9.97236
U180	0.0341287	29.5291	0.000956551	6.32618	1.46718	12.1099	0.281953	19.1553	0.281935	-6.94207	0.678953	2.12378	1033.38	49.7563
U181	0.0161124	21.1027	0.000501586	6.24215	1.46722	8.10578	0.282306	27.0867	0.2823	-4.03216	0.959114	1.5981	588.059	9.50329
U182	0.0212125	27.3931	0.000599728	5.51914	1.46722	9.73391	0.28184	24.0988	0.281832	-17.8052	0.853552	2.44988	712.56	10.5169
U184	0.0137916	11.169	0.000388388	2.35187	1.4672	15.7544	0.282417	16.1235	0.282413	0.63065	0.570956	1.36719	618.552	8.7583
U186	0.0391904	68.0668	0.00106354	17.334	1.46729	9.59476	0.282358	27.3922	0.282341	2.82093	0.970454	1.41917	828.39	11.3006
U187	0.020762	22.4371	0.000644004	5.41851	1.46721	14.819	0.282472	17.4645	0.282463	6.56518	0.618699	1.19146	803.196	14.4016
U189	0.0321314	32.5589	0.000895156	7.45661	1.46717	13.4617	0.281357	16.7982	0.281323	-6.15344	0.596749	2.88696	2016.39	27.2585
Sample Myr 17 (Myra 1 borehole, Late Oligocene)
Myr 17 - Seq 3b U141	0.0367403	38.769	0.00102802	9.02967	1.46723	11.7846	0.282492	18.5234	0.282481	2.67601	0.655916	1.24083	601.953	8.19901
U142	0.0129712	10.5305	0.000361853	2.1905	1.4672	13.3562	0.282392	20.6817	0.282388	-0.691275	0.732336	1.42365	598.82	7.85113
U143	0.0267764	25.1102	0.000769894	5.76514	1.46722	11.8176	0.282495	23.8581	0.282485	4.47783	0.844955	1.20143	674.937	8.56383
U144	0.0258872	21.9507	0.000715787	4.70935	1.4672	16.8469	0.282315	19.5371	0.282303	3.29183	0.692288	1.45906	908.514	11.2653
U145	0.019378	16.5819	0.000560313	3.83591	1.46727	13.2198	0.28154	12.9387	0.281519	0.774527	0.459639	2.50484	2014.51	15.7753
U146	0.0156752	14.8625	0.000441124	3.27262	1.46727	10.9829	0.28212	24.0318	0.282111	-0.32978	0.851828	1.77413	1049.02	35.3879
U148	0.0687072	73.8661	0.00200539	18.738	1.46722	12.2473	0.282675	17.6382	0.282649	10.2328	0.62467	0.880664	672.758	8.66121
U150	0.0225835	18.1243	0.000637247	3.88742	1.46721	12.4476	0.282155	18.0607	0.282147	-7.32519	0.639646	1.85623	682.815	9.22538
U151	0.0235056	22.4909	0.000655611	4.74739	1.46719	8.50179	0.282097	22.3914	0.282085	-3.7802	0.793482	1.87192	937.517	12.3947
U152	0.077248	61.8697	0.00211467	12.7823	1.46721	8.70824	0.282588	20.3563	0.282555	10.3652	0.721184	0.999237	825.907	10.4911
U153	0.0180656	15.7036	0.000513375	3.46673	1.46717	9.2697	0.281235	19.2873	0.281211	1.88979	0.685996	2.86727	2533.57	13.5317
U154	0.0148392	12.2283	0.000407635	2.64998	1.46725	15.2896	0.282147	23.7496	0.282143	-10.3977	0.840882	1.91674	552.998	7.13841
U155	0.020691	17.8405	0.000665301	4.56409	1.46717	15.3649	0.282207	16.7451	0.282195	-0.24216	0.593374	1.66411	921.045	12.1719
U156	0.0232832	30.929	0.000621587	7.51946	1.46724	14.0401	0.282233	19.0468	0.282224	-4.06294	0.674607	1.69705	706.164	9.0782
U157	0.0185945	23.2719	0.000609977	6.57064	1.46723	10.1248	0.282536	24.1556	0.282527	9.00605	0.855754	1.0625	810.992	11.2537
U158	0.0512406	46.6695	0.00138105	10.081	1.4672	17.3256	0.281688	16.6595	0.281673	-26.1209	0.589904	2.79888	593.318	7.47924
U159	0.0227024	18.9999	0.000604263	3.84217	1.46728	10.1969	0.28232	20.1678	0.282313	-2.83751	0.714173	1.55966	620.893	8.1524
U160	0.010126	21.5358	0.000265807	4.97488	1.4672	10.9732	0.282461	17.4736	0.282457	2.21503	0.618764	1.27966	618.238	8.06416
U161	0.0120511	9.73878	0.000337392	2.07076	1.46721	14.5649	0.282279	18.4785	0.282275	-4.52702	0.654331	1.63965	605.607	7.79615
U162	0.0118983	13.5442	0.000349757	3.17765	1.46716	10.0925	0.282472	28.7293	0.282467	5.89806	1.01768	1.19805	766.303	10.3924
U163	0.0208016	20.1374	0.000589137	4.37211	1.46714	4.42688	0.28186	49.7755	0.281852	-17.8984	1.76285	2.42583	677.271	9.06168
U164	0.0425022	37.0725	0.00116555	8.49606	1.46724	13.0572	0.281181	21.4619	0.281123	0.347674	0.763461	3.00776	2601.49	13.9661
U165	0.0213572	26.3568	0.000585709	6.44011	1.46716	10.3401	0.281745	19.0973	0.281734	-14.8934	0.676839	2.52599	996.328	26.0452
U166	0.0236539	19.6137	0.000675786	4.16394	1.4672	14.2691	0.280959	16.3085	0.280925	-6.42767	0.580155	3.38918	2612.67	13.1839
U167	0.00260564	3.09273	7.76887e-05	0.842003	1.46719	25.0031	0.282572	13.8455	0.282571	7.87866	0.490368	1.02663	691.305	9.40219
U168	0.0252029	23.5294	0.000691449	5.61601	1.46717	10.232	0.281793	27.1481	0.281781	-14.7173	0.962029	2.46241	930.664	11.4817
U169	0.016841	15.3075	0.000464255	3.27379	1.46724	12.1323	0.280969	18.4895	0.280947	-8.70711	0.657541	3.40618	2480.75	13.5439
U170	0.0416249	39.3041	0.00117593	9.24807	1.46717	10.2371	0.282688	24.2261	0.282679	5.63297	0.857501	0.928862	421.471	5.80065
U171	0.00164239	1.61583	3.56811e-05	0.263059	1.46719	12.2855	0.282295	15.9731	0.282294	-2.27715	0.565702	1.57393	675.551	8.43123
U172	0.0240402	19.5919	0.000699016	4.31319	1.46718	16.5356	0.281567	15.7767	0.28156	-31.0373	0.558594	3.0281	552.75	6.99297
U173	0.0131574	10.6698	0.000388902	2.37084	1.46723	15.5486	0.281098	16.0093	0.281079	-0.41225	0.569544	3.07762	2635.79	13.6351
U174	0.0230624	20.9607	0.000673709	5.10863	1.46718	12.4766	0.281754	19.4823	0.281743	-18.3796	0.690219	2.57514	826.948	10.3647
U175	0.0559807	59.6275	0.00179233	16.3794	1.46724	12.1677	0.281638	18.8041	0.281604	-19.3446	0.66646	2.77271	1003.64	22.5313
U176	0.0241631	19.5028	0.000734758	4.44889	1.46716	14.3821	0.282643	18.9661	0.282635	8.45832	0.671615	0.933374	617.041	8.54335
U177	0.0187764	17.0706	0.000548892	3.78907	1.4672	11.4749	0.282617	22.6423	0.28261	8.13979	0.801838	0.971023	641.32	8.95868
U178	0.0162099	15.6743	0.0004435	3.45731	1.46722	11.8696	0.282255	19.09	0.282249	-4.79553	0.676027	1.67784	634.131	8.3008
U179	0.0346811	32.2883	0.000965243	7.10654	1.46726	14.4372	0.282007	16.6691	0.281987	-3.97743	0.590893	2.00138	1081.84	42.0366
U180	0.0267067	25.6458	0.000769068	5.83353	1.46725	13.1169	0.281912	16.0191	0.281898	-9.24691	0.567733	2.21315	989.098	13.4711
U182	0.0319528	26.3982	0.00092476	5.80421	1.46724	13.6903	0.28208	22.8266	0.282063	-3.84325	0.808963	1.90138	969.136	11.9381
U183	0.0215083	17.8513	0.000589932	3.70006	1.46727	10.0992	0.282201	19.419	0.282191	-0.189869	0.688138	1.66932	930.881	11.8773
U184	0.0460836	37.0977	0.00130962	7.93899	1.46719	12.5471	0.282048	18.7872	0.282023	-4.93265	0.665829	1.97259	983.16	20.1161
U185	0.0204285	19.7353	0.000588693	5.02105	1.46722	9.80703	0.28232	18.8853	0.282313	-2.13383	0.668806	1.54673	652.069	8.44674
U186	0.00426208	3.99676	9.505e-05	0.660803	1.46724	18.9215	0.282122	91.2469	0.282121	-10.6886	3.23086	1.95051	574.765	7.40033
U187	0.053902	65.0062	0.00146205	15.2474	1.46722	13.5645	0.282365	16.6834	0.28235	-2.45312	0.590731	1.50534	580.542	7.3414
U188	0.0622628	54.9881	0.00162629	11.7054	1.46722	13.1254	0.28134	21.3566	0.281262	2.73741	0.759521	2.78574	2491.04	13.4003
U189	0.0177616	15.0869	0.000503	3.22548	1.46717	11.0713	0.281298	21.6085	0.281278	-7.84254	0.767623	2.97547	2011.65	15.1209
U195	0.0520352	63.8668	0.001318	13.6003	1.46725	11.0394	0.28181	20.7984	0.281785	-13.3487	0.737108	2.43212	984.066	12.3727
U196	0.0215867	18.106	0.000619054	4.1033	1.46723	9.24519	0.281661	40.0425	0.281651	-20.9427	1.41873	2.73917	858.28	11.1713
U197	0.017834	20.1938	0.000516544	5.34257	1.46726	10.7124	0.282473	21.1586	0.282466	4.3978	0.749397	1.22757	701.33	9.01053
U198	0.0101952	8.55569	0.00028815	1.87562	1.4672	13.1081	0.281706	17.9074	0.281703	-25.7251	0.634048	2.75354	564.061	7.36419
U199	0.0141017	11.658	0.000416757	2.60621	1.46722	8.42479	0.281603	24.9592	0.281599	-29.2938	0.883744	2.94866	569.187	7.15562
U200	0.0201577	21.1111	0.00056675	5.2762	1.46714	11.6267	0.28211	19.1155	0.282101	-6.13482	0.677194	1.89382	807.468	11.2561
U201	0.0391738	34.0736	0.00111753	7.39602	1.46721	9.96233	0.281194	21.1863	0.281136	3.03441	0.753824	2.93569	2695.08	13.7528
U203	0.0236702	50.222	0.000621801	12.1403	1.46724	11.1239	0.282601	19.819	0.282594	7.05147	0.701817	1.01233	618.195	8.20835
U204	0.0164558	38.6282	0.000502798	10.4318	1.46722	12.3631	0.281241	18.8844	0.281217	1.28184	0.671611	2.87169	2497.85	13.5151
U207	0.0676571	69.4868	0.00167643	13.9965	1.46717	5.59742	0.281809	40.4191	0.281776	-12.4815	1.43265	2.42837	1036.75	17.5631
U208	0.0343169	31.0271	0.000976276	6.9677	1.46721	12.8607	0.282569	15.8749	0.282552	12.0516	0.562515	0.970517	905.172	11.6248
U210	0.0234826	25.3004	0.000649783	4.66515	1.46717	4.25549	0.282551	36.8245	0.282539	12.7683	1.30501	0.974129	958.193	12.2452
U212	0.0164675	13.2366	0.000486146	2.9655	1.4672	11.7457	0.282574	18.5908	0.282568	7.53982	0.65842	1.0366	680.583	8.75053
U213	0.0317737	25.9456	0.000926622	5.67203	1.46719	9.7757	0.282508	22.5638	0.282494	7.34151	0.799323	1.13614	788.239	10.6214
U214	0.0224903	20.1573	0.000593174	4.07652	1.46718	13.5896	0.281887	16.1974	0.281876	-10.702	0.574015	2.26764	959.004	12.0867
U215	0.0305575	32.5331	0.000834694	7.35451	1.4672	11.0117	0.282409	20.4653	0.282401	-1.97026	0.724547	1.42926	520.355	7.23725
U216	0.0386437	41.678	0.00102577	8.08231	1.46719	9.52408	0.281337	20.0704	0.281293	-1.69373	0.713383	2.83648	2253.93	14.0235
U217	0.09395	88.3784	0.00278619	22.2417	1.46714	14.1606	0.281532	18.0091	0.281427	-3.25406	0.639713	2.69974	1981.83	13.7093
U218	0.088438	71.2831	0.00229984	13.8574	1.46713	8.39796	0.281914	19.4124	0.28188	-14.1442	0.687702	2.32436	800.721	10.2031
U219	0.0120521	9.94218	0.000370666	2.24665	1.46716	15.1374	0.282457	20.1827	0.282451	6.12302	0.714992	1.21458	801.54	10.4266
U220	0.0268028	25.1996	0.000937048	6.92954	1.46717	12.0097	0.28251	18.639	0.282495	8.17321	0.660338	1.11886	823.312	10.3905
U221	0.045055	48.9452	0.00142101	13.8002	1.46718	10.4915	0.282557	24.8483	0.282533	11.1372	0.880464	1.01326	895.228	11.0775
U223	0.0595957	52.1009	0.00157056	10.8904	1.46723	11.202	0.282085	20.8725	0.282061	-7.95456	0.739408	1.97859	789.698	10.1585
U224	0.0130137	10.6228	0.000376268	2.40046	1.46722	11.8568	0.282497	18.9342	0.282491	8.0098	0.670793	1.12719	822.413	10.9549
U225	0.0209764	18.1148	0.00064029	4.35181	1.46722	11.2172	0.282626	20.877	0.282618	8.85604	0.739355	0.947552	661.097	8.76924
U227	0.00608413	6.83745	0.000160651	1.66619	1.46722	10.5102	0.281262	22.8534	0.281254	2.47662	0.812755	2.80136	2492.52	13.7063
HF seq 4
U229	0.0375512	36.2708	0.00108994	8.39435	1.46714	12.9878	0.281858	18.2741	0.281836	-9.44663	0.647784	2.29702	1077.85	16.6096
U230	0.0306599	24.9795	0.000928217	5.64269	1.46716	12.3059	0.282636	18.045	0.282624	10.5299	0.639154	0.90809	726.184	9.30004
U231	0.0361829	40.0083	0.00104514	10.2037	1.46716	9.79531	0.282575	19.8233	0.282562	7.14183	0.702057	1.05272	673.36	8.60101
U232	0.0190191	15.3241	0.000589079	3.58023	1.46713	16.2511	0.282411	17.7319	0.282404	0.236144	0.627906	1.385	613.816	7.89683
U233	0.0303381	24.5828	0.000921162	5.67653	1.46713	13.1462	0.282388	17.0472	0.282377	-1.22341	0.603629	1.44695	591.606	7.46446
U234	0.0143022	11.769	0.000408169	2.50549	1.46713	14.8333	0.281926	19.6034	0.281922	-18.818	0.69404	2.35081	526.077	6.88578
U235	0.0087367	7.01251	0.000250385	1.51813	1.46708	16.3196	0.281858	17.3293	0.281854	-13.5247	0.614	2.3468	868.788	11.0526
U236	0.0186058	16.6002	0.000536089	3.67153	1.46711	13.3936	0.281743	16.943	0.281738	-24.9921	0.59987	2.69542	541.241	7.76891
U237	0.027897	22.3684	0.000848629	5.10928	1.46708	13.2069	0.282399	17.0814	0.282384	7.08066	0.605329	1.28358	950.013	12.3896
U238	0.0126139	28.8835	0.000313675	7.10163	1.4671	11.2408	0.28141	20.2265	0.281407	-36.1526	0.716166	3.31149	566.583	7.19428
U239	0.0822665	164.348	0.00241634	46.7151	1.46715	13.0876	0.281016	46.8725	0.280875	1.69315	1.66908	3.28473	3032.66	14.1139
U240	0.0109794	10.2582	0.000323842	2.15339	1.46717	10.306	0.282048	19.0328	0.282042	-4.50805	0.674517	1.94015	971.991	12.7198
U241	0.0429185	37.0115	0.00134652	8.89921	1.46716	15.5511	0.281844	14.6343	0.281828	-20.0223	0.518222	2.49325	620.051	8.06939
U242	0.0161743	13.5519	0.000469095	2.94974	1.4671	12.1341	0.282517	20.7603	0.282512	5.16705	0.735228	1.15463	664.367	8.36253
U243	0.0283131	22.7121	0.000892646	5.45259	1.46719	8.67437	0.281967	24.1925	0.281954	-11.8315	0.857016	2.18693	786.306	10.2839
U244	0.00248271	2.7147	6.18821e-05	0.546145	1.46716	16.0727	0.281836	16.4314	0.281835	-20.7217	0.581808	2.49639	578.167	7.31178
U245	0.0149886	12.9031	0.000520579	3.42623	1.46713	15.0537	0.281728	19.5164	0.281718	-15.8929	0.691663	2.56377	976.448	18.5809
U246	0.0347106	33.6531	0.000926717	6.7179	1.46708	17.2357	0.282611	17.1595	0.282598	9.5961	0.607789	0.959119	725.121	9.22645
U247	0.0111744	10.8362	0.000355167	2.67912	1.46717	10.0227	0.282536	21.421	0.282532	4.62681	0.758531	1.13798	607.851	7.90725
U248	0.0700122	211.412	0.00178047	50.7544	1.46719	13.2201	0.282579	21.9269	0.28256	4.81676	0.776382	1.09788	571.892	7.42818
U255	0.0160502	13.3164	0.000463224	2.93649	1.46711	14.5445	0.28177	17.2036	0.281761	-12.6967	0.609801	2.45224	1051.56	18.9877
U256	0.0463861	37.3059	0.00135461	8.21972	1.46716	13.0816	0.282567	18.0538	0.282552	4.73231	0.639255	1.11003	580.983	7.79942
U257	0.0324201	29.4877	0.001002	7.88606	1.46719	9.39233	0.281495	23.2469	0.28146	-4.81387	0.825544	2.6889	1864.06	17.3745
U258	0.0257892	20.7553	0.000763788	4.68925	1.46711	16.7528	0.282344	13.926	0.28233	6.49702	0.493575	1.364	1008.52	27.2599
U259	0.0305546	29.8937	0.00104782	8.85484	1.46716	11.9113	0.282444	16.3757	0.282427	6.69203	0.580211	1.23543	865.222	11.4818
U260	0.0443212	43.0024	0.00128841	10.0968	1.46716	13.5566	0.282431	18.4764	0.282407	8.84957	0.654826	1.21996	992.014	12.4342
U261	0.0106379	21.0507	0.000298819	5.60299	1.46714	18.1936	0.28179	16.8254	0.281787	-21.6079	0.595807	2.57452	615.045	7.87337
U262	0.0404363	64.4325	0.00116015	17.358	1.46712	13.444	0.282195	22.7547	0.282178	-3.42905	0.80612	1.74574	807.526	10.791
U265	0.0214278	17.3739	0.000621795	3.81229	1.46715	10.092	0.282402	17.4397	0.282393	4.89145	0.617872	1.31352	838.987	10.7108
U267	0.0573488	54.4721	0.00162194	12.2042	1.46718	11.5096	0.282533	21.9319	0.282508	9.14122	0.777038	1.08452	846.903	10.815
U268	0.041395	35.7856	0.00124257	8.40829	1.46709	13.5309	0.282477	17.7339	0.282458	6.46068	0.628247	1.1996	806.061	10.0513
U269	0.0126908	14.2934	0.000377525	3.92209	1.46718	11.0381	0.282318	18.7756	0.282314	-4.46104	0.664764	1.58827	547.629	7.08812
U270	0.0198293	16.8368	0.000558874	3.53886	1.46714	11.7312	0.282317	15.6871	0.28231	-2.61577	0.555522	1.55929	635.213	8.77616
Sample Dol 20 (Dolphin 1 borehole, Early Miocene)
Dol 20 - U444	0.021908	20.0047	0.000668065	4.62185	1.46714	15.994	0.282511	16.411	0.2825	9.82254	0.581491	1.08174	889.574	9.58353
U445	0.00996434	9.81676	0.000355591	2.933	1.46713	15.0377	0.282348	18.2236	0.282341	8.82601	0.646017	1.30439	1093.23	45.5016
U447	0.0111717	9.31353	0.00036559	2.34374	1.46711	15.4348	0.281837	15.9903	0.281832	-19.4343	0.566267	2.47804	640.049	5.52745
U448	0.0120403	10.2376	0.000382341	2.43858	1.46717	15.4721	0.282602	16.3337	0.282597	9.88506	0.578557	0.954669	739.233	7.14846
U449	0.0177673	22.9588	0.000535904	6.46537	1.46714	14.7543	0.282238	17.7007	0.282228	0.554561	0.627211	1.60667	904.512	10.1899
U450	0.0146128	11.7523	0.00042839	2.62145	1.46716	15.547	0.282071	14.9316	0.282063	-3.71453	0.529173	1.89874	974.508	8.96884
U451	0.0713172	64.5891	0.00193373	13.6911	1.46711	11.4665	0.281288	24.542	0.281196	0.394733	0.872804	2.91524	2491.25	15.0151
U452	0.0221005	17.7436	0.00069198	4.19692	1.46713	15.0969	0.282632	18.9612	0.282624	7.8713	0.671427	0.958113	607.537	7.23593
U453	0.0293765	25.3109	0.000870286	5.73574	1.46712	15.0557	0.282642	16.6502	0.28263	10.5682	0.589739	0.898723	717.385	7.73314
U455	0.0193379	16.4904	0.00054419	3.59071	1.46716	9.707	0.282255	22.8248	0.282249	-5.55073	0.808229	1.69238	601.615	7.39604
U456	0.0211353	32.4417	0.000599922	8.29901	1.46709	15.9019	0.282026	17.0843	0.282017	-9.77808	0.605196	2.06851	778.167	7.38405
U457	0.013727	14.4687	0.000374143	3.25873	1.46718	12.2971	0.282495	18.6546	0.282491	3.19561	0.660572	1.21799	609.031	6.40564
U458	0.0136642	11.6187	0.000456179	2.89446	1.4671	12.9626	0.281831	18.4613	0.281824	-15.6432	0.654039	2.42257	821.343	7.93692
U459	0.0451482	37.2872	0.00119676	7.53515	1.46714	15.8917	0.282178	15.1459	0.282162	-6.2043	0.536447	1.8161	708.449	6.99138
U460	0.0253403	21.0076	0.000779825	4.9028	1.46713	11.4725	0.281671	20.5097	0.28166	-22.0273	0.72657	2.747	796.924	10.323
U461	0.0309743	26.1821	0.000966268	6.25553	1.46718	13.006	0.28241	18.8515	0.282399	0.420326	0.667578	1.38855	630.434	6.63596
U462	0.0271466	22.1265	0.000783567	4.84209	1.4671	11.0354	0.282239	18.8085	0.282228	-3.03691	0.666229	1.67403	746.519	8.70162
U464	0.0301391	25.8002	0.000809262	5.58809	1.46714	15.2491	0.282336	14.8733	0.282321	5.19969	0.527095	1.39999	964.921	9.00515
U465	0.00884765	10.094	0.000306868	3.34589	1.46716	12.3566	0.28158	18.4641	0.281574	-21.936	0.654307	2.85574	934.896	8.54998
U466	0.00515805	5.34829	0.000150932	1.24855	1.46714	13.3501	0.281639	22.3625	0.281638	-27.8813	0.791803	2.87461	570.917	7.8969
U467	0.0970642	160.594	0.00240392	36.6325	1.46712	13.581	0.282667	25.3142	0.282643	6.78083	0.896231	0.953367	528.361	6.17463
U468	0.0338462	30.1581	0.000935683	6.41111	1.46716	14.7286	0.282068	18.9986	0.282051	-4.60671	0.673274	1.93042	953.579	8.83524
U469	0.0231493	18.5986	0.000692674	4.16531	1.46718	12.3545	0.282469	19.0592	0.282459	4.28263	0.675047	1.23879	707.229	6.36962
U470	0.0153801	12.3361	0.000437606	2.66554	1.46718	13.4629	0.2811	18.9641	0.28108	-4.45405	0.674385	3.15724	2461.02	20.1294
U472	0.0466631	37.9813	0.00124026	7.77998	1.46713	10.0532	0.282125	20.649	0.282103	-2.59192	0.731778	1.82708	962.229	8.46121
U473	0.0281861	29.231	0.000865192	7.57887	1.46714	11.6516	0.281675	21.844	0.281662	-21.9114	0.773838	2.74161	797.952	8.38318
U474	0.0259426	23.3782	0.000814476	5.97512	1.46716	13.1485	0.282522	15.6563	0.282511	6.76541	0.55456	1.12545	736.421	7.75513
U476	0.0620778	59.3939	0.00186409	14.6821	1.46718	10.0098	0.282655	20.8079	0.282628	11.7421	0.737094	0.879594	773.565	7.84076
U477	0.0203055	49.2644	0.000638336	13.7091	1.46715	10.8785	0.282622	18.9774	0.282615	7.51533	0.671999	0.97692	606.409	5.39408
U478	0.0322178	28.2804	0.000918933	6.6721	1.46715	13.1859	0.282329	16.9488	0.282312	5.37317	0.600677	1.40767	985.944	9.58943
U479	0.023735	20.3454	0.000831788	5.61798	1.46715	12.8742	0.282334	17.9461	0.282318	7.2556	0.636132	1.36484	1060.73	36.906
U485	0.0340274	30.88	0.000999527	7.43259	1.46715	11.3867	0.281579	17.8128	0.281538	4.00098	0.632949	2.41618	2124	22.0338
U486	0.0189556	16.1275	0.000574595	3.68352	1.46718	10.7142	0.282151	24.115	0.282145	-9.12746	0.853924	1.89147	606.261	6.17643
U487	0.0253834	29.1178	0.00069467	6.84549	1.46715	12.0654	0.281728	21.9648	0.28172	-24.3425	0.777771	2.70766	598.313	7.21113
U488	0.0215474	19.1554	0.000621093	4.25143	1.46719	11.1948	0.282431	19.0082	0.282422	4.89437	0.673373	1.27523	792.632	6.86366
U489	0.0143946	32.8177	0.000429416	8.9117	1.46716	13.7352	0.282566	16.6578	0.282561	6.4413	0.58991	1.06715	643.74	7.1662
U491	0.0269924	23.2072	0.000752058	4.94175	1.46714	17.6062	0.28218	13.9294	0.28217	-6.50506	0.49333	1.81167	683.1	7.33862
U492	0.0294396	24.9112	0.000880972	5.7739	1.46718	6.1009	0.282412	25.5765	0.282397	5.90433	0.906226	1.28844	876.641	8.02223
U493	0.0428336	41.9383	0.00122684	10.238	1.46717	12.7404	0.282144	23.1302	0.282122	-2.01187	0.819703	1.79213	958.455	9.08106
U494	0.015869	13.1161	0.00049685	3.06105	1.46711	12.1762	0.28152	21.7813	0.2815	2.65284	0.773966	2.49184	2125.39	18.6987
U495	0.00161692	3.05783	3.73286e-05	0.603745	1.46711	15.6256	0.282608	15.5242	0.282608	9.31671	0.549831	0.951704	697.238	5.5628
U496	0.0152626	14.6047	0.000483205	4.10134	1.46714	12.3848	0.282631	19.6837	0.282625	10.0363	0.697161	0.916295	702.797	7.26329
U497	0.0122299	10.206	0.000372647	2.359	1.46713	16.6574	0.28213	13.8017	0.282123	0.906032	0.489254	1.73581	1085.18	33.7911
U498	0.0546959	44.0236	0.00154973	9.53537	1.46719	10.3127	0.28259	25.1018	0.282571	6.66188	0.888926	1.04938	637.001	7.62407
U499	0.0110641	9.04411	0.000335829	2.05855	1.46716	13.2955	0.282445	17.6038	0.282441	-0.261468	0.623255	1.34607	533.322	5.66166
U500	0.0342553	32.4315	0.00108253	8.34819	1.46715	10.8461	0.281638	21.8973	0.281618	-18.9808	0.776077	2.74794	997.398	8.39962
U501	0.00245498	2.80701	7.18801e-05	0.663143	1.46719	9.8438	0.282508	18.1177	0.282507	5.20025	0.641651	1.15964	672.685	5.75231
U502	0.0191091	15.3248	0.000581766	3.49626	1.46717	10.8283	0.282407	17.8271	0.2824	0.296	0.63129	1.38927	623.008	6.14035
U503	0.0274603	23.1987	0.000775238	5.23235	1.46712	9.57868	0.281955	19.4029	0.281944	-12.3514	0.687333	2.20975	779.705	7.18466
U504	0.02706	49.5951	0.000784427	11.5534	1.46712	11.3034	0.281015	21.8888	0.280975	-4.04307	0.778714	3.27909	2637.98	14.0694
U506	0.0177257	16.3296	0.000501239	3.56026	1.46717	13.3063	0.281057	17.7351	0.281031	-1.26214	0.630993	3.15319	2671.06	15.634
U507	0.0185201	30.7445	0.00052902	6.35766	1.46719	14.5159	0.280964	19.1621	0.280939	-8.33579	0.681503	3.40933	2509.47	15.2394
U508	0.0427863	37.1925	0.00138455	9.5813	1.46713	12.8922	0.281523	18.0515	0.281473	-3.84967	0.641075	2.65314	1884.96	18.7591
U509	0.0209527	17.5403	0.000615815	3.93831	1.46715	13.7388	0.282167	19.1015	0.282161	-10.8177	0.67624	1.89983	504.76	4.4824
U510	0.00487038	5.25584	0.00011098	0.94536	1.46712	15.3614	0.281916	20.1017	0.281914	-16.1524	0.71189	2.31467	656.918	7.22514
U511	0.0509851	42.2544	0.00150062	9.32457	1.46718	12.1801	0.28225	20.877	0.282227	-1.07427	0.739645	1.63917	835.097	7.78852
U512	0.0219412	21.4915	0.000624956	5.13802	1.46718	12.2733	0.281615	19.417	0.281604	-20.8554	0.688077	2.79894	936.572	10.0574
U513	0.0202906	16.4172	0.000627562	3.80043	1.46713	16.9163	0.282339	15.7616	0.28233	0.141944	0.558275	1.4826	726.079	7.15236
U514	0.0613277	49.3412	0.00189711	11.5288	1.46714	11.4179	0.282465	17.8531	0.28243	9.54242	0.632728	1.17706	986.645	31.1706
U515	0.0100602	12.521	0.000302962	3.1145	1.46711	12.5987	0.281283	18.8672	0.281269	2.88308	0.670982	2.77452	2487.15	17.8921
U516	0.0268913	27.4798	0.000801795	6.95121	1.46716	12.4588	0.281771	21.8323	0.281762	-22.7761	0.773084	2.62602	601.325	6.46158
U517	0.0247037	20.0974	0.000715887	4.34524	1.46709	13.4636	0.282219	18.2798	0.28221	-4.98581	0.647415	1.73269	688.088	5.90707
U518	0.0203562	25.2465	0.000725812	7.72265	1.46719	10.6214	0.282463	18.7474	0.282451	7.37788	0.664228	1.19065	856.986	7.00599
U519	0.0231966	18.6103	0.000705183	4.23456	1.46708	12.4925	0.281982	18.0697	0.28197	-7.27733	0.640373	2.08483	963.746	9.3148
U520	0.0220594	17.705	0.000640298	3.89034	1.46708	15.4307	0.282321	17.2178	0.282309	5.50524	0.610227	1.40911	996.593	8.38259
U521	0.00761152	7.95992	0.000236561	2.09131	1.46713	12.4684	0.282496	17.6978	0.282493	2.79556	0.62666	1.22222	587.357	6.27336
U522	0.0104508	8.42146	0.000327915	2.01371	1.46715	16.1067	0.282103	12.9509	0.282099	-10.1784	0.458624	1.96951	631.51	6.01057
U523	0.0124587	10.2271	0.000382349	2.46108	1.46716	11.6668	0.281973	17.3754	0.281967	-9.49276	0.615636	2.12881	870.307	9.85916
U524	0.0346759	28.5253	0.00105046	6.70953	1.46718	15.1841	0.282472	16.2895	0.282453	9.63669	0.57727	1.1456	954.729	8.99004
U525	0.0375173	58.3101	0.00110413	16.3821	1.46714	9.49635	0.282519	19.49	0.282505	4.90907	0.690238	1.16743	662.584	7.25975
U526	0.012249	11.4327	0.000330992	2.49762	1.46716	8.70502	0.281742	19.5213	0.281738	-23.5768	0.691256	2.67164	604.475	6.4459
U528	0.0263445	22.0149	0.000813849	5.16556	1.46709	13.5926	0.282597	16.7355	0.282587	7.8223	0.592689	1.00672	663.301	6.0197
U529	0.0127859	12.7129	0.000382753	2.88091	1.46713	15.8169	0.280905	14.5702	0.280886	-7.85927	0.518316	3.46537	2610.03	15.5
[truncated: 1,295 more rows]

## Sheet: Lu-Hf Metadata
	LA-ICP-MS Lu-Hf data report
[truncated: 37 more rows]
