# Supplementary material
Source: publisher figshare collection journal article supplement (https://gsapubs.figshare.com/articles/dataset/_/23638812)
Supplement: Supplementary file 1 [file 1]

Glazer, A., Avigad, D., Morag, N., and Gerdes, A., 2023, Tracing Oligocene–Miocene source-to-sink systems in the deep Levant Basin: A sandstone provenance study: GSA Bulletin, <https://doi.org/10.1130/B36864.1>

## Supplemental Material

**Table S1.** Sampling information. This table provides the location of the studied borehole sections and the depth and age of the sampled intervals from each section.

**Table S2.** Zircon single grain (LA-ICP-MS) U-Pb and (LA-MC-ICP-MS) Lu-Hf analytical data. Tab 1 – “U-Pb LA-ICP-MS data” provides all the data obtained during the different analytical sessions, including discordant zircon ages. Tab 2 – “U-Pb Metadata” provides the LA-ICP-MS U-Pb analyses metadata report. Tab 3 – “Lu-Hf LA-MC-ICP-MS data” provides the Lu-Hf data obtained for previously dated zircon grains. Tab 4 – “Lu-Hf Metadata” provides the LA-MC-ICP-MS Lu-Hf analyses metadata report.

**Table S3.** Heavy mineral assemblage analyses data. This table provides the full heavy mineral assemblage analyses data.
